# Supplementary material for: CircParser: a novel streamlined pipeline for circular RNA structure and host gene prediction in non-model organisms
Source: PeerJ. 2020 Mar 16;8:e8757. doi: 10.7717/peerj.8757 (PMC7081776; doi:10.7717/peerj.8757)
Supplement: Table S3 [file peerj-08-8757-s003.xlsx]

## Sheet: circexplorer
Gene ID	Gene coordinates start	Gene coordinates end	Host gene for circRNAs ID	Host gene for circRNAs	Number of circRNAs	Minimum size, bp	Maximum size, bp	Structure
NC_031987.2	35819239	35836495	gi|1434971648|ref|XM_019353050.2|	PREDICTED: Oreochromis niloticus ras-associated and pleckstrin homology domains-containing protein 1 (LOC100710818), mRNA	1	17287	17287	exon-intron-exon-intron-exon-intron-intron-exon-intron-exon-intron-exon-intron-exon-intron-exon-intron-exon-intron-exon-
NC_031987.2	3424075	3424478	gi|1434974748|ref|XM_025904114.1|	PREDICTED: Oreochromis niloticus cyclin-T2 (LOC100698210), transcript variant X6, mRNA	1	432	432	intron-exon-exon-intron-
NC_031987.2	33880079	33880385	gi|1434972051|ref|XM_025903599.1|	PREDICTED: Oreochromis niloticus titin (LOC100702396), transcript variant X22, mRNA	1	337	337	intron-exon-
NC_031987.2	27189185	27201070	gi|1434974608|ref|XM_005475351.3|	PREDICTED: Oreochromis niloticus CD209 antigen-like protein A (LOC102078188), mRNA	1	11916	11916	intron-exon-exon-intron-
NC_031987.2	22316258	22317046	gi|1434972940|ref|XM_005475492.4|	PREDICTED: Oreochromis niloticus ABI family member 3 binding protein (abi3bp), transcript variant X4, mRNA	1	819	819	exon-exon-intron-exon-intron-
NC_031987.2	19104416	19106638	gi|1434974019|ref|XM_019352623.2|	PREDICTED: Oreochromis niloticus nectin-3 (LOC102080174), transcript variant X2, mRNA	1	2253	2253	exon-intron-exon-intron-exon-intron-
NC_031987.2	106679	109303	gi|1434973249|ref|XM_003458380.4|	PREDICTED: Oreochromis niloticus activin receptor type-2A (LOC100694010), mRNA	1	2651	2651	intron-exon-intron-exon-intron-exon-intron-exon-intron-exon-
NC_031986.2	6418944	6422515	gi|1434996686|ref|XM_003454734.4|	PREDICTED: Oreochromis niloticus cyclic nucleotide-gated channel cone photoreceptor subunit alpha (LOC100697819), mRNA	1	3600	3600	intron-exon-intron-exon-intron-exon-intron-exon-
NC_031986.2	42443744	42447945	gi|1434994096|ref|XM_005479056.4|	PREDICTED: Oreochromis niloticus SH2 domain-containing adapter protein D (LOC100709134), transcript variant X4, mRNA	1	4232	4232	exon-intron-exon-intron-
NC_031986.2	40703280	40705456	gi|923813959|ref|XM_005734017.2|	PREDICTED: Pundamilia nyererei midnolin-like (LOC102213195), mRNA	1	2207	2207	exon-intron-exon-intron-exon-intron-
NC_031986.2	3950836	3954216	gi|1434993584|ref|XM_025902687.1|	PREDICTED: Oreochromis niloticus dystrophin (LOC100694991), transcript variant X4, mRNA	1	3409	3409	intron-exon-intron-exon-
NC_031986.2	32846652	32931119	gi|1079800919|ref|XM_018669888.1|	PREDICTED: Lates calcarifer lipoma-preferred partner homolog (LOC108878886), transcript variant X3, mRNA	1	84498	84498	intron-exon-exon-exon-intron-exon-exon-exon-intron-exon-intron-intron-intron-intron-
NC_031986.2	2525331	2526568	gi|1434995047|ref|XM_025902986.1|	PREDICTED: Oreochromis niloticus dystrophin (LOC100700501), transcript variant X6, mRNA	1	1266	1266	exon-intron-exon-exon-intron-
NC_031986.2	11290351	11291278	gi|1434993398|ref|XM_005450058.4|	PREDICTED: Oreochromis niloticus muscleblind-like protein 2a (LOC100695201), transcript variant X15, mRNA	1	958	958	exon-intron-
NC_031986.2	11263254	11266860	gi|1434993398|ref|XM_005450058.4|	PREDICTED: Oreochromis niloticus muscleblind-like protein 2a (LOC100695201), transcript variant X15, mRNA	1	3637	3637	intron-exon-intron-exon-exon-intron-exon-
NC_031985.2	35529286	35529646	gi|674749515|gb|KF601827.1|	Oreochromis niloticus thioredoxin-interacting protein mRNA, complete cds	1	391	391	intron-exon-
NC_031985.2	23901712	23902275	gi|930743201|ref|XM_014335584.1|	PREDICTED: Haplochromis burtoni sorting nexin 13 (snx13), transcript variant X2, mRNA	1	594	594	intron-exon-intron-exon-intron-exon-
NC_031985.2	20668217	20669684	gi|1434992789|ref|XM_005478489.4|	PREDICTED: Oreochromis niloticus zinc finger protein 704 (znf704), transcript variant X2, mRNA	1	1498	1498	exon-intron-exon-intron-
NC_031984.2	28871774	28879522	gi|1434989738|ref|XM_003449124.5|	PREDICTED: Oreochromis niloticus catenin beta like 1 (ctnnbl1), mRNA	1	7779	7779	exon-intron-exon-intron-exon-intron-exon-intron-exon-intron-
NC_031984.2	20039485	20039976	gi|1434986526|ref|XM_003448235.5|	PREDICTED: Oreochromis niloticus calcium voltage-gated channel subunit alpha1 S (cacna1s), transcript variant X2, mRNA	1	522	522	intron-exon-intron-exon-intron-exon-
NC_031984.2	15224198	15225087	gi|1434987775|ref|XM_025901766.1|	PREDICTED: Oreochromis niloticus glutamate receptor-interacting protein 2 (LOC100699182), transcript variant X7, mRNA	1	920	920	intron-exon-exon-intron-exon-
NC_031983.2	9786805	9788646	gi|548423190|ref|XM_005742730.1|	PREDICTED: Pundamilia nyererei RAS guanyl releasing protein 1 (calcium and DAG-regulated) (rasgrp1), mRNA	1	1870	1870	intron-exon-intron-exon-intron-exon-
NC_031983.2	4961482	4975778	gi|1434997324|ref|XM_025903455.1|	PREDICTED: Oreochromis niloticus neoverrucotoxin subunit alpha-like (LOC112843957), mRNA	1	14325	14325	exon-intron-exon-exon-intron-intron-
NC_031983.2	30813627	30814989	gi|1434942737|ref|XM_003444416.5|	PREDICTED: Oreochromis niloticus sarcosine dehydrogenase (sardh), transcript variant X2, mRNA	1	1393	1393	intron-exon-intron-exon-intron-exon-intron-exon-intron-exon-
NC_031983.2	27294262	27294465	gi|1539176576|emb|LR132041.1|	NOT ASSIGNED	1	234	234	intron-
NC_031983.2	22346988	22348856	gi|1434985360|ref|XM_005477470.4|	PREDICTED: Oreochromis niloticus solute carrier family 8 member A3 (slc8a3), transcript variant X3, mRNA	1	1899	1899	exon-exon-intron-
NC_031983.2	17043882	17046949	gi|1434969166|ref|XM_019346046.2|	PREDICTED: Oreochromis niloticus fibrinogen-binding protein (LOC109194861), transcript variant X5, mRNA	1	3098	3098	intron-exon-intron-exon-intron-exon-intron-exon-intron-exon-intron-exon-intron-exon-intron-exon-intron-exon-intron-exon-
NC_031983.2	17042674	17046949	gi|1434969166|ref|XM_019346046.2|	PREDICTED: Oreochromis niloticus fibrinogen-binding protein (LOC109194861), transcript variant X5, mRNA	1	4306	4306	intron-exon-intron-exon-intron-exon-intron-exon-intron-exon-intron-exon-intron-exon-intron-exon-intron-exon-intron-exon-intron-exon-intron-exon-intron-exon-intron-exon-intron-exon-
NC_031982.2	34117602	34118973	gi|1434979728|ref|XM_005464201.4|	PREDICTED: Oreochromis niloticus ras GTPase-activating protein nGAP (LOC100701601), mRNA	1	1402	1402	intron-exon-intron-exon-intron-exon-
NC_031982.2	25218380	25221416	gi|1434981777|ref|XM_019347941.2|	PREDICTED: Oreochromis niloticus zinc finger FYVE-type containing 9 (zfyve9), transcript variant X6, mRNA	1	3067	3067	intron-exon-intron-exon-intron-exon-
NC_031982.2	23105200	23105671	gi|1434980878|ref|XM_003448490.4|	PREDICTED: Oreochromis niloticus complexin-4 (LOC100705335), transcript variant X1, mRNA	1	502	502	exon-exon-exon-
NC_031982.2	16980758	16986758	gi|930723540|ref|XM_014332625.1|	PREDICTED: Haplochromis burtoni zinc finger protein 521 (znf521), transcript variant X5, mRNA	1	6031	6031	exon-intron-exon-intron-
NC_031982.2	15091151	15093159	gi|1434978762|ref|XM_005476264.4|	PREDICTED: Oreochromis niloticus glypican-5 (LOC102077503), transcript variant X3, mRNA	1	2039	2039	exon-intron-exon-intron-exon-intron-
NC_031982.2	15066733	15106042	gi|1434978762|ref|XM_005476264.4|	PREDICTED: Oreochromis niloticus glypican-5 (LOC102077503), transcript variant X3, mRNA	1	39340	39340	exon-exon-intron-exon-intron-exon-intron-exon-intron-intron-
NC_031981.2	37978521	37981100	gi|1434977029|ref|XM_003449744.5|	PREDICTED: Oreochromis niloticus SET binding factor 1 (sbf1), transcript variant X5, mRNA	1	2610	2610	exon-intron-exon-intron-exon-intron-exon-intron-exon-intron-exon-intron-exon-intron-exon-intron-
NC_031981.2	33800910	33801496	gi|1434977580|ref|XM_005457086.4|	PREDICTED: Oreochromis niloticus receptor tyrosine kinase like orphan receptor 1 (ror1), transcript variant X1, mRNA	1	617	617	exon-exon-intron-exon-exon-intron-
NC_031981.2	32616549	32617575	gi|1434976301|ref|XM_025899546.1|	PREDICTED: Oreochromis niloticus synapse defective Rho GTPase homolog 2 (syde2), transcript variant X2, mRNA	1	1057	1057	intron-exon-intron-exon-
NC_031981.2	27267346	27267889	gi|1434976297|ref|XM_003457295.5|	PREDICTED: Oreochromis niloticus GDP-mannose 4,6-dehydratase (gmds), mRNA	1	574	574	exon-intron-exon-intron-
NC_031981.2	2606845	2610814	gi|1434978232|ref|XM_005451837.4|	PREDICTED: Oreochromis niloticus influenza virus NS1A binding protein (ivns1abp), transcript variant X2, mRNA	1	3998	3998	intron-exon-intron-exon-intron-exon-intron-exon-intron-exon-intron-exon-intron-exon-
NC_031981.2	12846841	12855976	gi|1434975392|ref|XM_003444948.5|	PREDICTED: Oreochromis niloticus staphylococcal nuclease and tudor domain containing 1 (snd1), transcript variant X1, mRNA	1	9166	9166	exon-intron-exon-intron-exon-intron-exon-intron-
NC_031981.2	12545455	12549945	gi|1434976347|ref|XM_019347071.2|	PREDICTED: Oreochromis niloticus voltage-dependent calcium channel subunit alpha-2/delta-1 (LOC100705144), transcript variant X6, mRNA	1	4521	4521	exon-intron-exon-intron-exon-intron-
NC_031981.2	11770507	11771010	gi|1434978006|ref|XM_019346817.2|	PREDICTED: Oreochromis niloticus ATPase plasma membrane Ca2+ transporting 1 (atp2b1), transcript variant X3, mRNA	1	534	534	exon-intron-
NC_031981.2	10272055	10281829	gi|1434976700|ref|XR_003214533.1|	PREDICTED: Oreochromis niloticus ELKS/Rab6-interacting/CAST family member 1 (LOC100690550), transcript variant X11, misc_RNA	1	9805	9805	exon-exon-intron-exon-intron-exon-intron-intron-
NC_031980.2	896113	897054	gi|930729063|ref|XM_005917127.2|	PREDICTED: Haplochromis burtoni serine/threonine-protein kinase MRCK alpha-like (LOC102297448), transcript variant X4, mRNA	1	968	968	intron-exon-intron-exon-intron-exon-intron-exon-
NC_031980.2	7546933	7547656	gi|1434968558|ref|XM_005449592.3|	PREDICTED: Oreochromis niloticus neuroblastoma amplified sequence (nbas), transcript variant X2, mRNA	1	752	752	intron-exon-intron-exon-
NC_031980.2	32787026	32789391	gi|583993873|ref|XM_006792024.1|	PREDICTED: Neolamprologus brichardi trimeric intracellular cation channel type A-like (LOC102777740), mRNA	1	2396	2396	intron-exon-intron-exon-intron-exon-intron-exon-
NC_031980.2	31400422	31430226	gi|329556156|gb|JF284171.1|	Oreochromis aureus female-specific RAPD marker OauF1488 genomic sequence	1	29835	29835	exon-intron-exon-exon-intron-intron-
NC_031980.2	17242067	17248216	gi|554842449|ref|XM_005931565.1|	PREDICTED: Haplochromis burtoni mitogen-activated protein kinase kinase kinase 5 (map3k5), mRNA	1	6180	6180	intron-exon-intron-exon-intron-exon-
NC_031979.2	6667235	6669122	gi|1434965347|ref|XM_005460993.4|	PREDICTED: Oreochromis niloticus putative serine protease K12H4.7 (LOC100705895), mRNA	1	1916	1916	intron-exon-exon-intron-exon-intron-
NC_031979.2	5328820	5337764	gi|313150351|dbj|AB505452.1|	Rana rugosa got1 gene for glutamate oxaloacetate transaminase, partial cds	1	8973	8973	intron-exon-intron-exon-intron-exon-intron-exon-intron-exon-
NC_031979.2	35013861	35016025	gi|923847711|ref|XM_013913810.1|	PREDICTED: Pundamilia nyererei hypoxia-inducible factor 1-alpha-like (LOC102195817), mRNA	1	2195	2195	exon-intron-exon-intron-
NC_031979.2	3312023	3324963	gi|1434966285|ref|XM_019367617.2|	PREDICTED: Oreochromis niloticus BCAS3, microtubule associated cell migration factor (bcas3), transcript variant X8, mRNA	1	12969	12969	intron-exon-intron-exon-intron-exon-intron-exon-intron-exon-intron-exon-
NC_031979.2	24409388	24409559	gi|1434964732|ref|XM_025898110.1|	PREDICTED: Oreochromis niloticus muscleblind like splicing regulator 1 (mbnl1), transcript variant X11, mRNA	1	202	202	intron-exon-
NC_031979.2	23188463	23189463	gi|1434963974|ref|XM_005459369.4|	PREDICTED: Oreochromis niloticus cut like homeobox 1 (cux1), transcript variant X2, mRNA	1	1031	1031	intron-exon-intron-exon-intron-exon-
NC_031979.2	21538325	21542264	gi|1434965116|ref|XM_025898165.1|	PREDICTED: Oreochromis niloticus dedicator of cytokinesis 10 (dock10), transcript variant X7, mRNA	1	3970	3970	intron-exon-intron-exon-intron-exon-intron-exon-intron-exon-intron-exon-intron-exon-intron-exon-intron-exon-intron-exon-
NC_031979.2	12145212	12146591	gi|1434965898|ref|XM_005454337.4|	PREDICTED: Oreochromis niloticus protein yippee-like 2 (LOC100702550), mRNA	1	1410	1410	exon-intron-exon-intron-exon-intron-
NC_031978.2	97181	105225	gi|584031099|ref|XM_006809945.1|	PREDICTED: Neolamprologus brichardi LIM domain-binding protein 3-like (LOC102797234), mRNA	1	8070	8070	intron-exon-exon-intron-exon-intron-exon-intron-exon-intron-
NC_031978.2	7765312	7778076	gi|1434963114|ref|XM_013268458.3|	PREDICTED: Oreochromis niloticus E3 ubiquitin-protein ligase pellino homolog 1 (LOC100711439), mRNA	1	12793	12793	intron-exon-intron-intron-exon-intron-exon-intron-exon-exon-
NC_031978.2	32513160	32517038	gi|1434942737|ref|XM_003444416.5|	PREDICTED: Oreochromis niloticus sarcosine dehydrogenase (sardh), transcript variant X2, mRNA	1	3909	3909	exon-intron-exon-intron-
NC_031978.2	31138246	31168862	gi|930732484|ref|XM_014332900.1|	PREDICTED: Haplochromis burtoni von Willebrand factor D and EGF domain-containing protein-like (LOC102310096), transcript variant X2, mRNA	1	30647	30647	exon-intron-exon-intron-exon-intron-exon-exon-intron-exon-intron-exon-exon-intron-exon-intron-intron-intron-
NC_031978.2	30759709	30763908	gi|1434961369|ref|XM_005461429.4|	PREDICTED: Oreochromis niloticus piezo type mechanosensitive ion channel component 1 (piezo1), mRNA	1	4230	4230	intron-exon-intron-exon-intron-exon-intron-exon-intron-exon-
NC_031978.2	30702660	30704116	gi|1434961369|ref|XM_005461429.4|	PREDICTED: Oreochromis niloticus piezo type mechanosensitive ion channel component 1 (piezo1), mRNA	1	1487	1487	intron-exon-exon-intron-
NC_031978.2	24459427	24459724	gi|1434962053|ref|XM_025897571.1|	PREDICTED: Oreochromis niloticus protein tyrosine kinase 7 (inactive) (ptk7), transcript variant X3, mRNA	1	328	328	intron-exon-
NC_031978.2	23649286	23651517	gi|1434960578|ref|XM_025897281.1|	PREDICTED: Oreochromis niloticus AT-rich interaction domain 4B (arid4b), mRNA	1	2262	2262	intron-exon-intron-exon-intron-exon-intron-exon-intron-exon-intron-exon-intron-exon-
NC_031978.2	22413738	22415927	gi|1434963172|ref|XM_003441017.5|	PREDICTED: Oreochromis niloticus calpain-1 catalytic subunit (LOC100691068), transcript variant X2, mRNA	1	2220	2220	intron-exon-intron-exon-intron-exon-
NC_031978.2	102601	105225	gi|118495715|dbj|AB270897.1|	Oreochromis niloticus MHC class IA antigen UBA1, UBA2, UAA1 genes, partial cds, UAA3 and UAA2 pseudogenes, UAA4, UAA5 and UAA6 pseudogene fragments	1	2651	2651	intron-exon-intron-exon-
NC_031977.2	6195083	6195494	gi|930758364|ref|XM_005940570.2|	PREDICTED: Haplochromis burtoni RAB35, member RAS oncogene family (rab35), transcript variant X1, mRNA	1	440	440	exon-intron-exon-intron-
NC_031977.2	37738521	37739187	gi|1434960004|ref|XM_005460110.4|	PREDICTED: Oreochromis niloticus hamartin (LOC100705892), transcript variant X3, mRNA	1	697	697	intron-exon-intron-exon-intron-exon-
NC_031977.2	30892679	30896142	gi|930774176|ref|XM_005952579.2|	PREDICTED: Haplochromis burtoni calcium/calmodulin-dependent protein kinase type II subunit beta-like (LOC102306429), mRNA	1	3494	3494	intron-exon-intron-exon-intron-exon-intron-exon-intron-exon-
NC_031977.2	22286250	22293892	gi|1434957902|ref|XM_005452117.4|	PREDICTED: Oreochromis niloticus phosphodiesterase 4D (pde4d), transcript variant X8, mRNA	1	7673	7673	exon-intron-exon-intron-exon-intron-exon-intron-exon-intron-
NC_031976.2	95035	95722	gi|1434954410|ref|XR_003222178.1|	PREDICTED: Oreochromis niloticus centrosomal protein 162 (cep162), transcript variant X11, misc_RNA	1	712	712	intron-exon-intron-exon-
NC_031976.2	4617930	4618143	gi|1434952765|ref|XM_013266543.3|	PREDICTED: Oreochromis niloticus SNF related kinase (snrk), transcript variant X4, mRNA	1	242	242	intron-exon-
NC_031976.2	4608762	4618143	gi|118495715|dbj|AB270897.1|	Oreochromis niloticus MHC class IA antigen UBA1, UBA2, UAA1 genes, partial cds, UAA3 and UAA2 pseudogenes, UAA4, UAA5 and UAA6 pseudogene fragments	1	9410	9410	exon-intron-exon-intron-
NC_031976.2	36016594	36018688	gi|1434954002|ref|XM_013275037.3|	PREDICTED: Oreochromis niloticus lamin A/C (lmna), transcript variant X2, mRNA	1	2125	2125	exon-intron-exon-intron-
NC_031976.2	349406	351650	gi|1434953734|ref|XM_005459408.4|	PREDICTED: Oreochromis niloticus activating signal cointegrator 1 complex subunit 3 (ascc3), transcript variant X7, mRNA	1	2271	2271	intron-exon-intron-exon-
NC_031976.2	20002178	20003557	gi|1434954376|ref|XM_003450933.4|	PREDICTED: Oreochromis niloticus pyruvate dehyrogenase phosphatase catalytic subunit 1 (pdp1), transcript variant X2, mRNA	1	1410	1410	intron-exon-intron-exon-intron-exon-
NC_031975.2	6608330	6611100	gi|1434952665|ref|XM_003456125.5|	PREDICTED: Oreochromis niloticus myotubularin related protein 4 (mtmr4), transcript variant X2, mRNA	1	2799	2799	intron-exon-intron-exon-intron-exon-intron-exon-intron-exon-
NC_031975.2	30861142	30861328	gi|930742334|ref|XM_005927883.2|	PREDICTED: Haplochromis burtoni sarcoglycan, delta (35kDa dystrophin-associated glycoprotein) (sgcd), transcript variant X4, mRNA	1	217	217	exon-intron-
NC_031974.2	3677057	3677501	gi|1434947568|ref|XM_013265285.3|	PREDICTED: Oreochromis niloticus enoyl-CoA delta isomerase 2 (eci2), transcript variant X3, mRNA	1	473	473	intron-exon-intron-exon-intron-exon-
NC_031974.2	33279230	33289842	gi|1434948660|ref|XM_025910436.1|	PREDICTED: Oreochromis niloticus microtubule-associated protein 4 (LOC100711676), transcript variant X11, mRNA	1	10643	10643	intron-exon-intron-exon-intron-exon-intron-exon-
NC_031974.2	29771389	29774852	gi|1434948134|ref|XM_005471630.4|	PREDICTED: Oreochromis niloticus zinc finger protein 438 (znf438), transcript variant X3, mRNA	1	3494	3494	exon-exon-intron-exon-
NC_031974.2	29672184	29679769	gi|1434947421|ref|XM_019362957.2|	PREDICTED: Oreochromis niloticus supervillin (svil), transcript variant X16, mRNA	1	7616	7616	intron-exon-intron-exon-intron-exon-intron-exon-intron-exon-
NC_031974.2	29670436	29679769	gi|1434947416|ref|XM_005471638.4|	PREDICTED: Oreochromis niloticus supervillin (svil), transcript variant X6, mRNA	1	9364	9364	intron-exon-exon-intron-exon-intron-exon-intron-exon-intron-exon-intron-exon-intron-
NC_031974.2	2839849	2852685	gi|118495715|dbj|AB270897.1|	Oreochromis niloticus MHC class IA antigen UBA1, UBA2, UAA1 genes, partial cds, UAA3 and UAA2 pseudogenes, UAA4, UAA5 and UAA6 pseudogene fragments	1	12865	12865	exon-intron-exon-intron-exon-intron-exon-exon-intron-intron-
NC_031974.2	2251333	2254201	gi|118495715|dbj|AB270897.1|	Oreochromis niloticus MHC class IA antigen UBA1, UBA2, UAA1 genes, partial cds, UAA3 and UAA2 pseudogenes, UAA4, UAA5 and UAA6 pseudogene fragments	1	2897	2897	intron-exon-intron-exon-intron-exon-intron-exon-intron-exon-intron-exon-
NC_031974.2	17036610	17037165	gi|1434948410|ref|XM_005448919.4|	PREDICTED: Oreochromis niloticus DLG associated protein 1 (dlgap1), transcript variant X4, mRNA	1	586	586	exon-intron-exon-intron-
NC_031973.2	9903732	9905025	gi|1434943742|ref|XM_019362446.2|	PREDICTED: Oreochromis niloticus eukaryotic elongation factor 2 kinase (eef2k), transcript variant X8, mRNA	1	1322	1322	intron-exon-intron-exon-intron-exon-intron-exon-
NC_031973.2	6562612	6563106	gi|1228981745|ref|XM_022199279.1|	PREDICTED: Acanthochromis polyacanthus ankyrin-3-like (LOC110954653), mRNA	1	523	523	intron-
NC_031973.2	6541345	6542303	gi|1434944303|ref|XM_019362294.2|	PREDICTED: Oreochromis niloticus ankyrin-3 (LOC100703272), transcript variant X13, mRNA	1	987	987	intron-exon-intron-exon-exon-
NC_031973.2	4664929	4672518	gi|1434945945|ref|XM_025909900.1|	PREDICTED: Oreochromis niloticus microtubule-associated protein tau (LOC100696807), transcript variant X27, mRNA	1	7618	7618	intron-exon-intron-exon-intron-exon-intron-exon-exon-intron-exon-intron-
NC_031973.2	3593091	3593378	gi|1434945303|ref|XM_003448623.5|	PREDICTED: Oreochromis niloticus NPL4 homolog, ubiquitin recognition factor (nploc4), mRNA	1	316	316	intron-exon-intron-exon-
NC_031973.2	28425173	28426156	gi|1434945067|ref|XR_269440.4|	PREDICTED: Oreochromis niloticus RFNG O-fucosylpeptide 3-beta-N-acetylglucosaminyltransferase (rfng), transcript variant X2, misc_RNA	1	1014	1014	intron-exon-intron-exon-intron-exon-intron-exon-
NC_031973.2	25289301	25292744	gi|1434944139|ref|XM_019362085.2|	PREDICTED: Oreochromis niloticus C-Jun-amino-terminal kinase-interacting protein 4 (LOC100690161), transcript variant X3, mRNA	1	3474	3474	exon-intron-exon-intron-exon-intron-exon-intron-
NC_031973.2	23874354	23875251	gi|930759894|ref|XM_014339880.1|	PREDICTED: Haplochromis burtoni ubiquitin carboxyl-terminal hydrolase 22 (LOC102314523), transcript variant X3, mRNA	1	928	928	intron-exon-intron-exon-
NC_031973.2	21793230	21795462	gi|1434944831|ref|XM_019362793.2|	PREDICTED: Oreochromis niloticus sorting nexin 29 (snx29), mRNA	1	2263	2263	exon-intron-exon-intron-exon-intron-
NC_031973.2	21757046	21795462	gi|1434944858|ref|XM_019362262.2|	PREDICTED: Oreochromis niloticus regulator of G protein signaling 9 (rgs9), transcript variant X1, mRNA	1	38447	38447	intron-exon-exon-exon-intron-exon-intron-exon-intron-intron-
NC_031973.2	1854459	1854640	gi|1434945996|ref|XM_025909909.1|	NOT ASSIGNED	1	210	210	intron-exon-exon-
NC_031973.2	10931166	10933059	gi|1434943805|ref|XM_019362507.2|	PREDICTED: Oreochromis niloticus protein tyrosine phosphatase, receptor type E (ptpre), transcript variant X7, mRNA	1	1924	1924	intron-exon-intron-exon-intron-exon-exon-intron-exon-
NC_031973.2	10480214	10481188	gi|1434944732|ref|XM_003441759.5|	PREDICTED: Oreochromis niloticus protein phosphatase 1B (LOC100708510), mRNA	1	1005	1005	intron-exon-intron-exon-
NC_031972.2	9033629	9035959	gi|1434942082|ref|XM_005449455.4|	PREDICTED: Oreochromis niloticus myocyte-specific enhancer factor 2C (LOC100706088), transcript variant X5, mRNA	1	2359	2359	intron-exon-intron-exon-
NC_031972.2	61867818	61878007	gi|1434940381|ref|XM_019361921.2|	PREDICTED: Oreochromis niloticus FYVE, RhoGEF and PH domain-containing protein 4 (LOC100693441), transcript variant X8, mRNA	1	10220	10220	exon-intron-exon-intron-exon-intron-exon-intron-exon-intron-
NC_031972.2	61245142	61245486	gi|1434936877|ref|XM_025908740.1|	PREDICTED: Oreochromis niloticus protein-methionine sulfoxide oxidase mical3a (LOC100695036), transcript variant X30, mRNA	1	375	375	exon-exon-intron-
NC_031972.2	52746507	52750889	gi|1434942889|ref|XM_019361621.2|	PREDICTED: Oreochromis niloticus tropomyosin 1 (tpm1), transcript variant X11, mRNA	1	4413	4413	intron-exon-intron-exon-exon-exon-intron-exon-intron-exon-intron-exon-
NC_031972.2	48411676	48413963	gi|930743823|ref|XM_014335746.1|	PREDICTED: Haplochromis burtoni CUGBP Elav-like family member 2 (LOC102310863), mRNA	1	2318	2318	intron-exon-intron-exon-intron-exon-
NC_031972.2	48409309	48413963	gi|930743823|ref|XM_014335746.1|	PREDICTED: Haplochromis burtoni CUGBP Elav-like family member 2 (LOC102310863), mRNA	1	4685	4685	intron-exon-intron-exon-intron-exon-intron-exon-intron-exon-
NC_031972.2	41189269	41189586	gi|1434940305|ref|XM_025909126.1|	PREDICTED: Oreochromis niloticus suppression of tumorigenicity 7 (st7), transcript variant X7, mRNA	1	348	348	intron-exon-exon-intron-
NC_031972.2	39783834	39788844	gi|1059791593|gb|AH013711.2|	Oreochromis niloticus KLR3 (KLR3) gene, exons 2 through 7; KLR2 pseudogene, partial sequence; KLR1 gene, complete sequence; KLR4 (KLR4) gene, exons 2 through 7; KLR5 (KLR5) gene, exons 1 through 7; KLR6 and KLR7 pseudogenes, complete sequence; KLR9 (KLR10) pseudogene, exons 4 through 7; KLR8 pseudogene, partial sequence; KLR9 (KLR9) gene, exons 1 through 7; C-type lectin (CLECT2)-like protein gen…	1	5041	5041	intron-exon-intron-exon-intron-exon-intron-exon-intron-exon-intron-exon-intron-exon-
NC_031972.2	3584467	3590213	gi|15076659|dbj|AB067589.1|	Melanochromis joanjohnsonae DNA, SINE sequence, locus:1613	1	5775	5775	intron-exon-intron-exon-intron-exon-intron-exon-intron-exon-exon-intron-exon-intron-exon-intron-exon-intron-exon-intron-
NC_031972.2	3583994	3584608	gi|1434936045|ref|XM_005449241.3|	PREDICTED: Oreochromis niloticus troponin T, fast skeletal muscle isoforms (LOC100707421), transcript variant X5, mRNA	1	643	643	intron-exon-intron-exon-
NC_031972.2	3497909	3499132	gi|1434940081|ref|XM_025909097.1|	PREDICTED: Oreochromis niloticus troponin I, fast skeletal muscle (LOC100706619), transcript variant X2, mRNA	1	1252	1252	intron-exon-exon-intron-exon-intron-exon-
NC_031972.2	32935903	32936219	gi|1434941338|ref|XM_003440194.5|	NOT ASSIGNED	1	347	347	intron-exon-intron-exon-
NC_031972.2	16393608	16398923	gi|1434941958|ref|XM_025909222.1|	PREDICTED: Oreochromis niloticus CDK5 regulatory subunit associated protein 2 (cdk5rap2), transcript variant X6, mRNA	1	5346	5346	intron-exon-intron-exon-intron-exon-intron-exon-intron-exon-intron-exon-intron-exon-intron-exon-intron-exon-intron-exon-exon-intron-exon-intron-exon-intron-exon-
NC_031971.2	4834406	4841830	gi|28849242|dbj|AB104861.1|	Oreochromis niloticus GnRH1 gene for seabream-type gonadotropin-releasing hormone precursor, complete cds	1	7453	7453	intron-exon-intron-exon-intron-exon-intron-exon-intron-exon-intron-exon-intron-exon-intron-exon-intron-exon-intron-exon-intron-exon-
NC_031971.2	42021772	42028544	gi|118495715|dbj|AB270897.1|	Oreochromis niloticus MHC class IA antigen UBA1, UBA2, UAA1 genes, partial cds, UAA3 and UAA2 pseudogenes, UAA4, UAA5 and UAA6 pseudogene fragments	1	6803	6803	intron-exon-intron-exon-exon-intron-exon-intron-
NC_031971.2	4075464	4076159	gi|1434931636|ref|XM_005461334.4|	PREDICTED: Oreochromis niloticus endoplasmic reticulum oxidoreductase 1 beta (ero1b), transcript variant X2, mRNA	1	724	724	intron-exon-intron-exon-
NC_031971.2	30305629	30307437	gi|1434929402|ref|XM_025907908.1|	PREDICTED: Oreochromis niloticus gamma-adducin (LOC100699311), transcript variant X9, mRNA	1	1839	1839	intron-exon-intron-exon-intron-exon-
NC_031971.2	27059185	27061091	gi|583984586|ref|XM_006787490.1|	PREDICTED: Neolamprologus brichardi ubinuclein-2-like (LOC102799674), mRNA	1	1937	1937	intron-exon-intron-exon-intron-exon-
NC_031971.2	25666302	25666706	gi|1434932087|ref|XM_013272986.3|	PREDICTED: Oreochromis niloticus septin-9 (LOC100703172), transcript variant X8, mRNA	1	435	435	intron-exon-intron-exon-
NC_031971.2	16934304	16952556	gi|118495715|dbj|AB270897.1|	Oreochromis niloticus MHC class IA antigen UBA1, UBA2, UAA1 genes, partial cds, UAA3 and UAA2 pseudogenes, UAA4, UAA5 and UAA6 pseudogene fragments	1	18283	18283	exon-intron-exon-exon-intron-exon-intron-intron-
NC_031971.2	14134754	14145218	gi|1434933317|ref|XM_025908384.1|	PREDICTED: Oreochromis niloticus sorbin and SH3 domain containing 2 (sorbs2), transcript variant X20, mRNA	1	10495	10495	intron-exon-exon-intron-
NC_031970.2	32666105	32668191	gi|1434926028|ref|XM_005450143.4|	PREDICTED: Oreochromis niloticus PDZ domain containing ring finger 3 (pdzrn3), transcript variant X2, mRNA	1	2117	2117	exon-intron-exon-intron-
NC_031970.2	24262376	24264783	gi|1317083159|ref|XM_023420114.1|	PREDICTED: Seriola lalandi dorsalis zinc finger protein 148-like (LOC111665193), mRNA	1	2438	2438	intron-exon-intron-exon-intron-exon-intron-exon-intron-exon-
NC_031969.2	9156347	9157313	gi|1434919439|ref|XM_025906771.1|	PREDICTED: Oreochromis niloticus RNA binding protein fox-1 homolog 2 (LOC100692969), transcript variant X8, mRNA	1	995	995	intron-exon-intron-exon-intron-exon-
NC_031969.2	3374248	3374450	gi|1434918953|ref|XR_001224518.3|	PREDICTED: Oreochromis niloticus endo-beta-N-acetylglucosaminidase (engase), transcript variant X2, misc_RNA	1	231	231	intron-exon-
NC_031967.2	17263035	17268992	gi|1434912565|ref|XM_003458877.5|	PREDICTED: Oreochromis niloticus acyl-CoA dehydrogenase very long chain (acadvl), mRNA	1	5988	5988	intron-exon-intron-exon-intron-exon-intron-exon-intron-exon-intron-exon-intron-exon-intron-exon-exon-intron-exon-intron-
NC_031967.2	10565665	10581723	gi|1434911592|ref|XM_005468083.3|	PREDICTED: Oreochromis niloticus pyruvate carboxylase (pc), transcript variant X4, mRNA	1	16089	16089	intron-exon-exon-intron-exon-intron-exon-intron-exon-intron-exon-intron-exon-intron-exon-intron-
NC_031966.2	29940844	29941924	gi|1434906544|ref|XM_005467991.4|	PREDICTED: Oreochromis niloticus SH3 domain and tetratricopeptide repeat-containing protein 2 (LOC100706213), transcript variant X2, mRNA	1	1111	1111	intron-exon-intron-exon-
NC_031966.2	2346241	2346622	gi|1434904306|ref|XM_019362711.2|	PREDICTED: Oreochromis niloticus casein kinase 1 alpha 1 (csnk1a1), transcript variant X5, mRNA	1	410	410	exon-intron-exon-intron-
NC_031966.2	21354416	21356032	gi|583971973|ref|XM_006781341.1|	PREDICTED: Neolamprologus brichardi probable E3 ubiquitin-protein ligase MID2-like (LOC102785246), transcript variant X5, mRNA	1	1647	1647	exon-intron-exon-intron-
NC_031966.2	19855867	19856269	gi|1434905358|ref|XM_005467457.4|	PREDICTED: Oreochromis niloticus phosphatidylinositol 3,4,5-trisphosphate 5-phosphatase 2B (LOC100706013), transcript variant X2, mRNA	1	433	433	intron-exon-intron-exon-
NC_031966.2	17389008	17402230	gi|1434905127|ref|XM_019364388.2|	PREDICTED: Oreochromis niloticus multidrug resistance-associated protein 5 (LOC100710139), transcript variant X2, mRNA	1	13253	13253	intron-exon-intron-exon-intron-exon-intron-exon-intron-exon-intron-exon-intron-exon-intron-exon-intron-intron-exon-intron-exon-intron-exon-intron-exon-intron-exon-intron-exon-intron-exon-exon-
NC_031965.2	38718394	38718628	gi|930737382|ref|XM_005923979.2|	PREDICTED: Haplochromis burtoni elongation factor Tu GTP binding domain containing 1 (eftud1), transcript variant X2, mRNA	1	265	265	intron-exon-intron-exon-
NC_031965.2	38339312	38339627	gi|930737366|ref|XM_014334106.1|	PREDICTED: Haplochromis burtoni gamma-aminobutyric acid receptor-associated protein-like 2 (LOC102302824), mRNA	1	346	346	exon-intron-exon-intron-
NC_031965.2	37448920	37453960	gi|1434903713|ref|XM_025908301.1|	PREDICTED: Oreochromis niloticus puratrophin-1 (LOC100709838), transcript variant X5, mRNA	1	5071	5071	intron-exon-intron-exon-intron-exon-intron-exon-intron-exon-intron-exon-intron-exon-intron-exon-intron-exon-
NC_031965.2	37435819	37436209	gi|1434903713|ref|XM_025908301.1|	PREDICTED: Oreochromis niloticus puratrophin-1 (LOC100709838), transcript variant X5, mRNA	1	421	421	intron-exon-intron-exon-
NC_031965.2	30922236	30922649	gi|1434903350|ref|XM_025907584.1|	PREDICTED: Oreochromis niloticus chromodomain helicase DNA binding protein 9 (chd9), transcript variant X7, mRNA	1	444	444	intron-exon-
NC_031965.2	28586862	28589424	gi|1434903121|ref|XM_013275277.3|	PREDICTED: Oreochromis niloticus unconventional myosin-Va (LOC100704034), transcript variant X7, mRNA	1	2593	2593	intron-exon-intron-exon-intron-exon-intron-exon-intron-exon-intron-exon-intron-exon-intron-exon-
NC_031965.2	14691610	14694528	gi|927621733|gb|KT656911.1|	Telmatochromis sp. 'dhonti yellow' ultra conserved element locus uce-1072 genomic sequence	1	2949	2949	intron-exon-exon-intron-exon-intron-exon-intron-exon-
NC_031965.2	10928954	10929278	gi|1434901729|ref|XM_019354114.2|	PREDICTED: Oreochromis niloticus neogenin 1 (neo1), transcript variant X11, mRNA	1	355	355	exon-intron-
NC_031965.2	1017806	1018564	gi|1434901065|ref|XM_019363023.2|	PREDICTED: Oreochromis niloticus zinc finger protein 408 (znf408), mRNA	1	787	787	exon-intron-

## Sheet: circfinder
Gene ID	Gene coordinates start	Gene coordinates end	Host gene for circRNAs ID	Host gene for circRNAs	Number of circRNAs	Minimum size, bp	Maximum size, bp	Structure
NC_031987.2	7708398	7708532	gi|584018188|ref|XM_006803755.1|	PREDICTED: Neolamprologus brichardi E3 ubiquitin-protein ligase TRIM63-like (LOC102793986), mRNA	1	163	163	exon-
NC_031987.2	7708386	7708520	gi|584018188|ref|XM_006803755.1|	PREDICTED: Neolamprologus brichardi E3 ubiquitin-protein ligase TRIM63-like (LOC102793986), mRNA	1	163	163	exon-
NC_031987.2	7708254	7708525	gi|584018188|ref|XM_006803755.1|	PREDICTED: Neolamprologus brichardi E3 ubiquitin-protein ligase TRIM63-like (LOC102793986), mRNA	1	300	300	exon-
NC_031987.2	7581882	7582196	gi|584026237|ref|XM_006807634.1|	PREDICTED: Neolamprologus brichardi collagen alpha-3(VI) chain-like (LOC102783379), mRNA	1	343	343	exon-
NC_031987.2	6583699	6584966	gi|1434973042|ref|XM_013266549.3|	PREDICTED: Oreochromis niloticus sterol 26-hydroxylase, mitochondrial (LOC100691854), mRNA	1	1296	1296	exon-intron-exon-intron-exon-intron-exon-intron-
NC_031987.2	6583690	6584957	gi|1434973042|ref|XM_013266549.3|	PREDICTED: Oreochromis niloticus sterol 26-hydroxylase, mitochondrial (LOC100691854), mRNA	1	1296	1296	exon-intron-exon-intron-exon-intron-exon-
NC_031987.2	578783	578989	gi|1434971523|ref|XM_025903492.1|	PREDICTED: Oreochromis niloticus titin (LOC100695257), mRNA	1	233	233	exon-
NC_031987.2	550844	551598	gi|1434971523|ref|XM_025903492.1|	PREDICTED: Oreochromis niloticus titin (LOC100695257), mRNA	1	781	781	exon-
NC_031987.2	547066	547395	gi|1434971523|ref|XM_025903492.1|	PREDICTED: Oreochromis niloticus titin (LOC100695257), mRNA	1	356	356	exon-
NC_031987.2	540415	540684	gi|1434971523|ref|XM_025903492.1|	PREDICTED: Oreochromis niloticus titin (LOC100695257), mRNA	1	296	296	exon-
NC_031987.2	526808	533890	gi|1434971523|ref|XM_025903492.1|	PREDICTED: Oreochromis niloticus titin (LOC100695257), mRNA	1	7109	7109	intron-exon-intron-exon-intron-exon-intron-exon-intron-exon-intron-exon-intron-exon-intron-exon-intron-exon-intron-exon-intron-exon-intron-exon-intron-exon-intron-exon-exon-
NC_031987.2	526276	526485	gi|1434971523|ref|XM_025903492.1|	PREDICTED: Oreochromis niloticus titin (LOC100695257), mRNA	1	236	236	exon-
NC_031987.2	5199735	5199935	gi|1434973326|ref|XM_025903908.1|	PREDICTED: Oreochromis niloticus striated muscle preferentially expressed protein kinase (LOC100707609), transcript variant X5, mRNA	1	229	229	exon-
NC_031987.2	501585	502291	gi|1434971523|ref|XM_025903492.1|	PREDICTED: Oreochromis niloticus titin (LOC100695257), mRNA	1	733	733	exon-intron-exon-intron-exon-
NC_031987.2	429706	430068	gi|1434971523|ref|XM_025903492.1|	PREDICTED: Oreochromis niloticus titin (LOC100695257), mRNA	1	389	389	exon-
NC_031987.2	35819240	35836495	gi|1434971648|ref|XM_019353050.2|	PREDICTED: Oreochromis niloticus ras-associated and pleckstrin homology domains-containing protein 1 (LOC100710818), mRNA	1	17286	17286	exon-intron-exon-intron-exon-intron-intron-exon-intron-exon-intron-exon-intron-exon-intron-exon-intron-exon-exon-
NC_031987.2	3424076	3424478	gi|1434974748|ref|XM_025904114.1|	PREDICTED: Oreochromis niloticus cyclin-T2 (LOC100698210), transcript variant X6, mRNA	1	431	431	exon-exon-intron-
NC_031987.2	33996286	34010847	gi|1059791593|gb|AH013711.2|	Oreochromis niloticus KLR3 (KLR3) gene, exons 2 through 7; KLR2 pseudogene, partial sequence; KLR1 gene, complete sequence; KLR4 (KLR4) gene, exons 2 through 7; KLR5 (KLR5) gene, exons 1 through 7; KLR6 and KLR7 pseudogenes, complete sequence; KLR9 (KLR10) pseudogene, exons 4 through 7; KLR8 pseudogene, partial sequence; KLR9 (KLR9) gene, exons 1 through 7; C-type lectin (CLECT2)-like protein gen…	1	14592	14592	exon-exon-intron-exon-intron-exon-intron-exon-exon-intron-
NC_031987.2	33887686	33887957	gi|1434972051|ref|XM_025903599.1|	PREDICTED: Oreochromis niloticus titin (LOC100702396), transcript variant X22, mRNA	1	302	302	exon-
NC_031987.2	33880080	33880385	gi|1434972051|ref|XM_025903599.1|	PREDICTED: Oreochromis niloticus titin (LOC100702396), transcript variant X22, mRNA	1	336	336	exon-
NC_031987.2	33875928	33878037	gi|1434972051|ref|XM_025903599.1|	PREDICTED: Oreochromis niloticus titin (LOC100702396), transcript variant X22, mRNA	1	2140	2140	exon-intron-exon-intron-exon-intron-exon-intron-exon-
NC_031987.2	33869135	33869274	gi|1434972051|ref|XM_025903599.1|	PREDICTED: Oreochromis niloticus titin (LOC100702396), transcript variant X22, mRNA	1	170	170	exon-
NC_031987.2	33868922	33869310	gi|1434972051|ref|XM_025903599.1|	PREDICTED: Oreochromis niloticus titin (LOC100702396), transcript variant X22, mRNA	1	419	419	exon-intron-exon-
NC_031987.2	33862415	33862573	gi|1434972051|ref|XM_025903599.1|	PREDICTED: Oreochromis niloticus titin (LOC100702396), transcript variant X22, mRNA	1	189	189	exon-
NC_031987.2	33862409	33862567	gi|1434972051|ref|XM_025903599.1|	PREDICTED: Oreochromis niloticus titin (LOC100702396), transcript variant X22, mRNA	1	189	189	exon-
NC_031987.2	33861374	33863912	gi|1434972051|ref|XM_025903599.1|	PREDICTED: Oreochromis niloticus titin (LOC100702396), transcript variant X22, mRNA	1	2569	2569	intron-exon-intron-exon-intron-exon-exon-
NC_031987.2	33860561	33860776	gi|1434972051|ref|XM_025903599.1|	PREDICTED: Oreochromis niloticus titin (LOC100702396), transcript variant X22, mRNA	1	246	246	exon-
NC_031987.2	33857784	33861317	gi|1434972051|ref|XM_025903599.1|	PREDICTED: Oreochromis niloticus titin (LOC100702396), transcript variant X22, mRNA	1	3564	3564	exon-
NC_031987.2	33857780	33861313	gi|1434972051|ref|XM_025903599.1|	PREDICTED: Oreochromis niloticus titin (LOC100702396), transcript variant X22, mRNA	1	3564	3564	exon-
NC_031987.2	33849196	33856157	gi|1434972051|ref|XM_025903599.1|	PREDICTED: Oreochromis niloticus titin (LOC100702396), transcript variant X22, mRNA	1	6992	6992	exon-
NC_031987.2	33848566	33848707	gi|930766879|ref|XM_014329240.1|	PREDICTED: Haplochromis burtoni titin-like (LOC102303117), mRNA	1	172	172	exon-
NC_031987.2	33830814	33831270	gi|1434972051|ref|XM_025903599.1|	PREDICTED: Oreochromis niloticus titin (LOC100702396), transcript variant X22, mRNA	1	487	487	exon-intron-exon-
NC_031987.2	33830175	33830369	gi|1434972051|ref|XM_025903599.1|	PREDICTED: Oreochromis niloticus titin (LOC100702396), transcript variant X22, mRNA	1	225	225	exon-
NC_031987.2	33829461	33829778	gi|1434972051|ref|XM_025903599.1|	PREDICTED: Oreochromis niloticus titin (LOC100702396), transcript variant X22, mRNA	1	348	348	exon-
NC_031987.2	33821601	33823859	gi|1434972051|ref|XM_025903599.1|	PREDICTED: Oreochromis niloticus titin (LOC100702396), transcript variant X22, mRNA	1	2289	2289	exon-intron-exon-intron-exon-
NC_031987.2	33808721	33808906	gi|1434972051|ref|XM_025903599.1|	PREDICTED: Oreochromis niloticus titin (LOC100702396), transcript variant X22, mRNA	1	216	216	exon-
NC_031987.2	33808715	33808900	gi|1434972051|ref|XM_025903599.1|	PREDICTED: Oreochromis niloticus titin (LOC100702396), transcript variant X22, mRNA	1	216	216	exon-
NC_031987.2	33808233	33866663	gi|1434972051|ref|XM_025903599.1|	PREDICTED: Oreochromis niloticus titin (LOC100702396), transcript variant X22, mRNA	1	58461	58461	exon-intron-exon-intron-exon-intron-exon-intron-exon-intron-exon-intron-exon-intron-exon-intron-exon-intron-exon-intron-exon-intron-exon-intron-exon-intron-exon-intron-exon-intron-exon-intron-exon-intron-exon-intron-exon-intron-exon-exon-intron-exon-intron-exon-intron-exon-intron-exon-intron-exon-intron-exon-intron-exon-intron-exon-intron-exon-intron-exon-intron-exon-intron-exon-intron-exon-intro…
NC_031987.2	33808079	33808281	gi|1434972051|ref|XM_025903599.1|	PREDICTED: Oreochromis niloticus titin (LOC100702396), transcript variant X22, mRNA	1	233	233	exon-
NC_031987.2	33747474	33751637	gi|1434972051|ref|XM_025903599.1|	PREDICTED: Oreochromis niloticus titin (LOC100702396), transcript variant X22, mRNA	1	4194	4194	exon-intron-exon-intron-exon-intron-exon-intron-intron-exon-intron-exon-exon-
NC_031987.2	33736891	33737121	gi|1434972045|ref|XM_025903596.1|	PREDICTED: Oreochromis niloticus titin (LOC100702396), transcript variant X19, mRNA	1	261	261	exon-intron-exon-
NC_031987.2	33700594	33700993	gi|1434972051|ref|XM_025903599.1|	PREDICTED: Oreochromis niloticus titin (LOC100702396), transcript variant X22, mRNA	1	430	430	exon-intron-exon-
NC_031987.2	33687669	33688555	gi|1434972051|ref|XM_025903599.1|	PREDICTED: Oreochromis niloticus titin (LOC100702396), transcript variant X22, mRNA	1	917	917	exon-intron-exon-
NC_031987.2	2816850	2819600	gi|1434972935|ref|XM_005450418.4|	PREDICTED: Oreochromis niloticus neuropilin-2 (LOC100695821), transcript variant X3, mRNA	1	2779	2779	exon-exon-intron-exon-intron-
NC_031987.2	27189186	27201070	gi|1434974608|ref|XM_005475351.3|	PREDICTED: Oreochromis niloticus CD209 antigen-like protein A (LOC102078188), mRNA	1	11915	11915	exon-exon-intron-
NC_031987.2	27041120	27064827	gi|1434973801|ref|XM_025903966.1|	PREDICTED: Oreochromis niloticus interleukin-1 receptor type 2-like (LOC112844175), mRNA	1	23738	23738	exon-intron-exon-intron-exon-intron-exon-intron-exon-intron-exon-intergenic-exon-exon-exon-intron-exon-intron-exon-exon-intron-exon-intron-exon-intron-exon-intron-
NC_031987.2	27041002	27064198	gi|1434973801|ref|XM_025903966.1|	PREDICTED: Oreochromis niloticus interleukin-1 receptor type 2-like (LOC112844175), mRNA	1	23227	23227	exon-intron-exon-intron-exon-intron-exon-intron-exon-intron-exon-intergenic-exon-exon-exon-intron-exon-intron-exon-exon-intron-exon-intron-exon-intron-
NC_031987.2	27028699	27041119	gi|1434973799|ref|XM_019353065.2|	PREDICTED: Oreochromis niloticus interleukin-1 receptor type 2 (LOC109197618), transcript variant X1, mRNA	1	12451	12451	exon-intron-exon-intron-exon-intron-exon-intron-exon-intron-exon-intron-exon-intergenic-exon-intron-exon-intron-exon-intron-exon-exon-exon-
NC_031987.2	26813882	26814395	gi|1434971482|ref|XM_019352997.2|	PREDICTED: Oreochromis niloticus nebulin (neb), transcript variant X8, mRNA	1	544	544	exon-intron-exon-intron-
NC_031987.2	26813873	26814386	gi|584008559|ref|XM_006799177.1|	PREDICTED: Neolamprologus brichardi nebulin-like (LOC102775746), mRNA	1	544	544	exon-intron-exon-
NC_031987.2	26806591	26807094	gi|1434971483|ref|XM_025903481.1|	PREDICTED: Oreochromis niloticus nebulin (neb), transcript variant X9, mRNA	1	534	534	exon-intron-exon-
NC_031987.2	26795589	26798122	gi|1434971483|ref|XM_025903481.1|	PREDICTED: Oreochromis niloticus nebulin (neb), transcript variant X9, mRNA	1	2564	2564	exon-intron-exon-intron-exon-intron-exon-intron-exon-intron-exon-intron-exon-intron-exon-intron-exon-
NC_031987.2	26795511	26798044	gi|1434971483|ref|XM_025903481.1|	PREDICTED: Oreochromis niloticus nebulin (neb), transcript variant X9, mRNA	1	2564	2564	exon-intron-exon-intron-exon-intron-exon-intron-exon-intron-exon-intron-exon-intron-exon-intron-exon-
NC_031987.2	26791601	26792855	gi|1434971483|ref|XM_025903481.1|	PREDICTED: Oreochromis niloticus nebulin (neb), transcript variant X9, mRNA	1	1285	1285	exon-intron-exon-intron-exon-intron-exon-intron-exon-
NC_031987.2	26788886	26794052	gi|1434971483|ref|XM_025903481.1|	PREDICTED: Oreochromis niloticus nebulin (neb), transcript variant X9, mRNA	1	5197	5197	exon-intron-exon-intron-exon-intron-exon-intron-exon-intron-exon-intron-exon-intron-exon-intron-exon-intron-exon-intron-exon-intron-exon-intron-exon-intron-exon-intron-exon-intron-exon-intron-exon-
NC_031987.2	26788856	26792503	gi|1434971483|ref|XM_025903481.1|	PREDICTED: Oreochromis niloticus nebulin (neb), transcript variant X9, mRNA	1	3678	3678	exon-intron-exon-intron-exon-intron-exon-intron-exon-intron-exon-intron-exon-intron-exon-intron-exon-intron-exon-intron-exon-intron-exon-
NC_031987.2	26788856	26791360	gi|1434971483|ref|XM_025903481.1|	PREDICTED: Oreochromis niloticus nebulin (neb), transcript variant X9, mRNA	1	2535	2535	exon-intron-exon-intron-exon-intron-exon-intron-exon-intron-exon-intron-exon-intron-exon-
NC_031987.2	26788856	26789953	gi|1434971483|ref|XM_025903481.1|	PREDICTED: Oreochromis niloticus nebulin (neb), transcript variant X9, mRNA	1	1128	1128	exon-intron-exon-intron-exon-intron-exon-
NC_031987.2	26781440	26782549	gi|1434971483|ref|XM_025903481.1|	PREDICTED: Oreochromis niloticus nebulin (neb), transcript variant X9, mRNA	1	1140	1140	exon-intron-exon-intron-exon-intron-exon-intron-exon-
NC_031987.2	26382388	26389810	gi|1434972481|ref|XR_003216718.1|	PREDICTED: Oreochromis niloticus semaphorin 5B (sema5b), transcript variant X7, misc_RNA	1	7453	7453	exon-intron-exon-intron-exon-intron-exon-
NC_031987.2	22316259	22317046	gi|1434972940|ref|XM_005475492.4|	PREDICTED: Oreochromis niloticus ABI family member 3 binding protein (abi3bp), transcript variant X4, mRNA	1	818	818	exon-exon-intron-exon-
NC_031987.2	22238802	22239470	gi|1434971965|ref|XM_019353008.2|	PREDICTED: Oreochromis niloticus discoidin, CUB and LCCL domain containing 2 (dcbld2), transcript variant X1, mRNA	1	699	699	exon-exon-exon-exon-intron-exon-intron-exon-exon-
NC_031987.2	21798241	21798386	gi|1434973120|ref|XM_003451548.5|	PREDICTED: Oreochromis niloticus SPRY domain containing 7 (spryd7), mRNA	1	176	176	exon-
NC_031987.2	21667160	21673355	gi|118495715|dbj|AB270897.1|	Oreochromis niloticus MHC class IA antigen UBA1, UBA2, UAA1 genes, partial cds, UAA3 and UAA2 pseudogenes, UAA4, UAA5 and UAA6 pseudogene fragments	1	6226	6226	exon-intron-exon-intron-exon-
NC_031987.2	20729185	20729364	gi|1434972618|ref|XM_005457840.4|	PREDICTED: Oreochromis niloticus DDB1 and CUL4 associated factor 6 (dcaf6), transcript variant X9, mRNA	1	210	210	exon-
NC_031987.2	20601587	20604686	gi|1434971640|ref|XM_003452923.5|	PREDICTED: Oreochromis niloticus X-linked Kx blood group (xk), mRNA	1	3130	3130	exon-exon-intron-exon-intron-exon-
NC_031987.2	17270371	17271616	gi|1434974810|ref|XM_025904123.1|	PREDICTED: Oreochromis niloticus dedicator of cytokinesis 9 (dock9), transcript variant X13, mRNA	1	1276	1276	exon-intron-exon-intron-exon-intron-exon-intron-exon-
NC_031987.2	15126096	15134055	gi|1434974171|ref|XM_025904011.1|	PREDICTED: Oreochromis niloticus tetratricopeptide repeat, ankyrin repeat and coiled-coil containing 1 (tanc1), transcript variant X7, mRNA	1	7990	7990	exon-intron-exon-intron-exon-
NC_031987.2	13530517	13530903	gi|1434974528|ref|XM_005451907.4|	PREDICTED: Oreochromis niloticus transmembrane protein 198-B (LOC100707447), mRNA	1	417	417	exon-exon-
NC_031987.2	13524658	13524879	gi|1434974524|ref|XM_003445295.5|	PREDICTED: Oreochromis niloticus desmin (LOC100695476), mRNA	1	252	252	exon-
NC_031987.2	11360556	11362298	gi|1434974521|ref|XM_003445310.5|	PREDICTED: Oreochromis niloticus tumor protein, translationally-controlled 1 (tpt1), mRNA	1	1773	1773	exon-intron-exon-
NC_031987.2	11141197	11142730	gi|1434972147|ref|XM_019353261.2|	PREDICTED: Oreochromis niloticus alsin (LOC100694505), transcript variant X4, mRNA	1	1564	1564	exon-intron-exon-intron-exon-exon-intron-exon-
NC_031986.2	6418945	6422515	gi|1434996686|ref|XM_003454734.4|	PREDICTED: Oreochromis niloticus cyclic nucleotide-gated channel cone photoreceptor subunit alpha (LOC100697819), mRNA	1	3599	3599	exon-intron-exon-intron-exon-intron-exon-
NC_031986.2	45446980	45454070	gi|1434994128|ref|XM_019351843.2|	PREDICTED: Oreochromis niloticus ubiquitin specific peptidase 13 (usp13), transcript variant X4, mRNA	1	7121	7121	exon-intron-intron-exon-exon-
NC_031986.2	45119249	45119970	gi|1434996481|ref|XM_013268343.3|	PREDICTED: Oreochromis niloticus nexilin F-actin binding protein (nexn), transcript variant X3, mRNA	1	752	752	exon-intron-exon-
NC_031986.2	44706228	44706703	gi|1434994225|ref|XM_013266777.3|	PREDICTED: Oreochromis niloticus insulin receptor (LOC100697854), mRNA	1	506	506	exon-
NC_031986.2	44654383	44654931	gi|1434994225|ref|XM_013266777.3|	PREDICTED: Oreochromis niloticus insulin receptor (LOC100697854), mRNA	1	579	579	exon-
NC_031986.2	42802105	42850692	gi|927599563|gb|KT634745.1|	Neolamprologus pulcher voucher Matthew D. McGee:4405 ultra conserved element locus uce-375 genomic sequence	1	48618	48618	intron-exon-intron-exon-intron-exon-intron-exon-intron-exon-intron-intron-exon-intron-intron-exon-intron-exon-intron-exon-intron-exon-intron-exon-intron-exon-intron-exon-intron-exon-intron-exon-intron-exon-exon-intron-exon-intron-exon-intron-exon-intron-exon-intron-exon-intron-exon-intron-exon-intron-exon-exon-exon-intron-
NC_031986.2	42443745	42447945	gi|1434994096|ref|XM_005479056.4|	PREDICTED: Oreochromis niloticus SH2 domain-containing adapter protein D (LOC100709134), transcript variant X4, mRNA	1	4231	4231	exon-intron-exon-
NC_031986.2	40778612	40779537	gi|1434996726|ref|XM_003439856.5|	PREDICTED: Oreochromis niloticus follistatin like 3 (fstl3), mRNA	1	956	956	exon-intergenic-
NC_031986.2	40703281	40705456	gi|923813959|ref|XM_005734017.2|	PREDICTED: Pundamilia nyererei midnolin-like (LOC102213195), mRNA	1	2206	2206	exon-intron-exon-intron-exon-
NC_031986.2	39540392	39552090	gi|1434996225|ref|XM_003439880.5|	PREDICTED: Oreochromis niloticus cytochrome P450 2J2 (LOC100699634), mRNA	1	11729	11729	exon-intergenic-exon-intron-exon-intron-exon-intron-exon-intron-exon-intron-exon-intron-exon-exon-intron-exon-intron-
NC_031986.2	3950837	3954216	gi|1434993584|ref|XM_025902687.1|	PREDICTED: Oreochromis niloticus dystrophin (LOC100694991), transcript variant X4, mRNA	1	3408	3408	exon-intron-exon-
NC_031986.2	39139925	39142505	gi|548368607|ref|XM_005732201.1|	PREDICTED: Pundamilia nyererei Ral GEF with PH domain and SH3 binding motif 2 (ralgps2), transcript variant X4, mRNA	1	2611	2611	exon-intron-exon-intron-exon-exon-intron-
NC_031986.2	3902038	3925004	gi|1381369009|ref|XM_004573540.2|	PREDICTED: Maylandia zebra high affinity immunoglobulin epsilon receptor subunit beta (LOC101463824), mRNA	1	22995	22995	exon-intron-exon-intron-exon-intron-exon-intron-exon-intron-exon-exon-intron-exon-intron-exon-intron-exon-intron-
NC_031986.2	3872741	3886611	gi|1434909132|ref|XR_002058664.2|	PREDICTED: Oreochromis niloticus polymeric immunoglobulin receptor (LOC102079294), transcript variant X10, misc_RNA	1	13899	13899	exon-intron-exon-exon-intron-
NC_031986.2	38361744	38362856	gi|1434995039|ref|XM_003439908.5|	PREDICTED: Oreochromis niloticus phospholipid phosphatase 3 (plpp3), transcript variant X2, mRNA	1	1143	1143	exon-intron-exon-intron-exon-
NC_031986.2	37062632	37064168	gi|1434994545|ref|XM_005478848.4|	PREDICTED: Oreochromis niloticus palladin, cytoskeletal associated protein (palld), transcript variant X4, mRNA	1	1567	1567	exon-intron-exon-intron-exon-
NC_031986.2	37062595	37064273	gi|1434994545|ref|XM_005478848.4|	PREDICTED: Oreochromis niloticus palladin, cytoskeletal associated protein (palld), transcript variant X4, mRNA	1	1709	1709	exon-intron-exon-intron-exon-
NC_031986.2	36545663	36546418	gi|548370439|ref|XM_005732440.1|	PREDICTED: Pundamilia nyererei Nance-Horan syndrome (congenital cataracts and dental anomalies) (nhs), mRNA	1	786	786	exon-exon-intron-exon-
NC_031986.2	36486458	36486631	gi|1434995030|ref|XM_005478826.4|	PREDICTED: Oreochromis niloticus Scm polycomb group protein like 2 (LOC100700345), transcript variant X5, mRNA	1	204	204	exon-
NC_031986.2	35942086	35948290	gi|1434993362|ref|XM_003451333.4|	PREDICTED: Oreochromis niloticus dihydrolipoamide branched chain transacylase E2 (dbt), mRNA	1	6235	6235	exon-intron-exon-intron-exon-intron-exon-intron-exon-intron-exon-intron-exon-intron-exon-intron-exon-intron-intergenic-exon-exon-exon-
NC_031986.2	34591144	34594246	gi|1434995155|ref|XM_013275090.3|	PREDICTED: Oreochromis niloticus elongation factor for RNA polymerase II (ell), transcript variant X2, mRNA	1	3133	3133	exon-intron-exon-intron-exon-intron-exon-
NC_031986.2	33213581	33213744	gi|930732210|ref|XM_014332834.1|	PREDICTED: Haplochromis burtoni ATPase, Na+/K+ transporting, beta 1 polypeptide (atp1b1), mRNA	1	194	194	exon-
NC_031986.2	32846653	32931119	gi|1079800919|ref|XM_018669888.1|	PREDICTED: Lates calcarifer lipoma-preferred partner homolog (LOC108878886), transcript variant X3, mRNA	1	84497	84497	exon-exon-exon-intron-exon-exon-exon-intron-exon-intron-intron-intron-intron-
NC_031986.2	32302695	32305731	gi|1434993314|ref|XM_013270736.3|	PREDICTED: Oreochromis niloticus bcl-2-related ovarian killer protein homolog A (LOC100689837), transcript variant X2, mRNA	1	3067	3067	exon-exon-intron-exon-
NC_031986.2	30909916	30942364	gi|1434995685|ref|XM_019351519.2|	PREDICTED: Oreochromis niloticus aldehyde dehydrogenase family 9 member A1-like (LOC109196929), mRNA	1	32479	32479	exon-intron-exon-intron-exon-intron-exon-intron-exon-intron-exon-intron-exon-intron-exon-exon-intron-exon-intron-exon-intron-exon-intron-exon-intron-exon-intron-exon-intron-exon-intron-exon-intron-exon-intron-exon-intron-exon-intergenic-exon-intron-exon-intron-exon-intron-exon-intron-exon-exon-intron-exon-intron-exon-intron-exon-intron-exon-intron-intron-exon-intron-exon-intron-exon-intron-exon-i…
NC_031986.2	30909696	30941602	gi|1434995685|ref|XM_019351519.2|	PREDICTED: Oreochromis niloticus aldehyde dehydrogenase family 9 member A1-like (LOC109196929), mRNA	1	31937	31937	exon-intron-exon-intron-exon-intron-exon-intron-exon-intron-exon-intron-exon-intron-exon-intron-exon-exon-intron-exon-intron-exon-intron-exon-intron-exon-intron-exon-intron-exon-intron-exon-intron-exon-intron-exon-intron-exon-intron-exon-intergenic-exon-intron-exon-intron-exon-intron-exon-intron-exon-exon-intron-exon-intron-exon-intron-exon-intron-exon-intron-intron-exon-intron-exon-intron-exon-i…
NC_031986.2	30909696	30930005	gi|1434995685|ref|XM_019351519.2|	PREDICTED: Oreochromis niloticus aldehyde dehydrogenase family 9 member A1-like (LOC109196929), mRNA	1	20340	20340	exon-intron-exon-intron-exon-intron-exon-intron-exon-intron-exon-intron-exon-intron-exon-intron-exon-exon-intron-exon-intron-exon-intron-exon-intron-exon-intron-exon-intron-exon-intron-exon-intron-exon-intron-exon-intron-exon-intron-exon-intergenic-exon-intron-exon-intron-exon-intron-exon-intron-exon-exon-intron-exon-intron-exon-intron-exon-intergenic-
NC_031986.2	30909696	30918261	gi|1434995686|ref|XM_019351516.2|	PREDICTED: Oreochromis niloticus aldehyde dehydrogenase family 9 member A1 (LOC109194280), transcript variant X1, mRNA	1	8596	8596	exon-intron-exon-intron-exon-intron-exon-intron-exon-intron-exon-intron-exon-intron-exon-intron-exon-exon-intron-exon-intron-exon-intergenic-
NC_031986.2	30908555	30917233	gi|1434995686|ref|XM_019351516.2|	PREDICTED: Oreochromis niloticus aldehyde dehydrogenase family 9 member A1 (LOC109194280), transcript variant X1, mRNA	1	8709	8709	exon-intron-exon-intron-exon-intron-exon-intron-exon-intron-exon-intron-exon-intron-exon-intron-exon-intron-exon-intron-exon-exon-intergenic-
NC_031986.2	3001681	3003540	gi|1434993642|ref|XM_005463665.4|	PREDICTED: Oreochromis niloticus CD99 antigen (LOC100705374), transcript variant X1, mRNA	1	1888	1888	exon-intron-exon-intron-exon-
NC_031986.2	27911515	27915550	gi|1468919737|ref|XM_026159550.1|	PREDICTED: Astatotilapia calliptera sodium channel subunit beta-4-like (LOC113016612), mRNA	1	4066	4066	exon-intron-exon-intron-exon-intergenic-exon-intron-
NC_031986.2	26567053	26645842	gi|118495715|dbj|AB270897.1|	Oreochromis niloticus MHC class IA antigen UBA1, UBA2, UAA1 genes, partial cds, UAA3 and UAA2 pseudogenes, UAA4, UAA5 and UAA6 pseudogene fragments	1	78820	78820	intron-exon-intron-exon-intron-exon-exon-intron-exon-intron-exon-intron-exon-intron-exon-intron-exon-intron-exon-exon-exon-exon-intron-exon-intron-exon-intron-exon-intron-exon-intron-exon-intron-exon-intron-exon-intron-exon-intron-intron-intron-intron-
NC_031986.2	25260123	25260577	gi|1381407315|ref|XM_024798603.1|	PREDICTED: Maylandia zebra NLR family CARD domain-containing protein 3 (LOC101474066), transcript variant X7, mRNA	1	485	485	intron-
NC_031986.2	2525332	2526568	gi|1434995047|ref|XM_025902986.1|	PREDICTED: Oreochromis niloticus dystrophin (LOC100700501), transcript variant X6, mRNA	1	1265	1265	exon-intron-exon-exon-
NC_031986.2	23702373	23703131	gi|1434996322|ref|XM_005459176.2|	PREDICTED: Oreochromis niloticus nucleotide-binding oligomerization domain-containing protein 1 (LOC102077803), mRNA	1	789	789	exon-
NC_031986.2	22142703	22142847	gi|1434995373|ref|XM_003453183.4|	PREDICTED: Oreochromis niloticus myosin light chain 3, skeletal muscle isoform (LOC100698429), mRNA	1	175	175	exon-
NC_031986.2	1866924	1872657	gi|118495715|dbj|AB270897.1|	Oreochromis niloticus MHC class IA antigen UBA1, UBA2, UAA1 genes, partial cds, UAA3 and UAA2 pseudogenes, UAA4, UAA5 and UAA6 pseudogene fragments	1	5762	5762	exon-exon-intron-exon-intron-exon-intron-exon-exon-intron-exon-intron-
NC_031986.2	17834135	17836723	gi|1434996107|ref|XM_019352040.2|	PREDICTED: Oreochromis niloticus collagen alpha-1(XVIII) chain (LOC100712198), transcript variant X7, mRNA	1	2619	2619	exon-intron-exon-intron-exon-intron-exon-intron-exon-intron-exon-
NC_031986.2	17688	43760	gi|1434974018|ref|XM_019352622.2|	PREDICTED: Oreochromis niloticus nectin-3 (LOC102080174), transcript variant X1, mRNA	1	26097	26097	exon-intron-exon-exon-intron-exon-intron-
NC_031986.2	17684	43756	gi|1434974018|ref|XM_019352622.2|	PREDICTED: Oreochromis niloticus nectin-3 (LOC102080174), transcript variant X1, mRNA	1	26097	26097	exon-intron-exon-exon-intron-exon-intron-
NC_031986.2	14355978	14361756	gi|1434984769|ref|XM_025901110.1|	PREDICTED: Oreochromis niloticus transmembrane protein 151B (LOC100699592), transcript variant X1, mRNA	1	5809	5809	exon-intron-exon-intergenic-exon-intron-exon-intron-exon-intron-exon-
NC_031986.2	14355772	14361506	gi|1434984769|ref|XM_025901110.1|	PREDICTED: Oreochromis niloticus transmembrane protein 151B (LOC100699592), transcript variant X1, mRNA	1	5765	5765	exon-intron-exon-intron-exon-intergenic-exon-intron-exon-intron-exon-intron-
NC_031986.2	14355770	14361504	gi|1434984769|ref|XM_025901110.1|	PREDICTED: Oreochromis niloticus transmembrane protein 151B (LOC100699592), transcript variant X1, mRNA	1	5765	5765	exon-intron-exon-intron-exon-intergenic-exon-intron-exon-intron-exon-
NC_031986.2	14153825	14154106	gi|1434994035|ref|XM_005463087.3|	PREDICTED: Oreochromis niloticus thymosin beta 4 X-linked (tmsb4x), mRNA	1	312	312	exon-
NC_031986.2	12928478	12928815	gi|1434996699|ref|XM_025903298.1|	PREDICTED: Oreochromis niloticus probable uridine nucleosidase 1 (LOC100704461), transcript variant X5, mRNA	1	368	368	exon-intron-exon-
NC_031986.2	12789514	12789651	gi|1110929704|ref|XM_003455881.4|	PREDICTED: Oreochromis niloticus importin 5 (ipo5), mRNA	1	168	168	exon-
NC_031986.2	12535289	12555365	gi|723802023|tpe|BN000676.1|	TPA: Xenopus tropicalis Tc1-like transposon, Beagle	1	20107	20107	exon-intron-exon-exon-exon-exon-intron-exon-intron-exon-intron-exon-intron-exon-intron-exon-intron-exon-intron-intron-intron-
NC_031986.2	11717194	11728432	gi|1434995374|ref|XM_019351906.2|	PREDICTED: Oreochromis niloticus ATP-binding cassette sub-family B member 6, mitochondrial (LOC100696961), mRNA	1	11269	11269	exon-intron-exon-intron-exon-intron-exon-intron-exon-intron-exon-intron-exon-intron-exon-intron-exon-intron-exon-intron-exon-intergenic-exon-intron-exon-intron-exon-intron-exon-intron-exon-intron-exon-intron-exon-intron-exon-intron-exon-
NC_031986.2	11263255	11266860	gi|1434993398|ref|XM_005450058.4|	PREDICTED: Oreochromis niloticus muscleblind-like protein 2a (LOC100695201), transcript variant X15, mRNA	1	3636	3636	exon-intron-exon-exon-intron-exon-
NC_031985.2	8236224	8238088	gi|908527113|ref|XM_013265948.1|	PREDICTED: Oreochromis niloticus retinoic acid receptor RXR-beta-A (LOC100534499), transcript variant X11, mRNA	1	1893	1893	exon-intron-exon-intron-exon-
NC_031985.2	5722361	5722540	gi|908538825|ref|XM_013276099.1|	PREDICTED: Oreochromis niloticus voltage-dependent calcium channel gamma-6 subunit (LOC100708105), transcript variant X1, mRNA	1	208	208	exon-
NC_031985.2	38119256	38122001	gi|1434991078|ref|XM_019350937.2|	PREDICTED: Oreochromis niloticus erythrocyte membrane protein band 4.1 (epb41), transcript variant X16, mRNA	1	2776	2776	exon-intron-exon-exon-intron-exon-intron-exon-
NC_031985.2	37485977	37493045	gi|1434990655|ref|XM_013266007.3|	PREDICTED: Oreochromis niloticus PHD finger protein 14 (phf14), transcript variant X6, mRNA	1	7099	7099	exon-exon-intron-exon-exon-intron-
NC_031985.2	37429999	37430174	gi|1434990655|ref|XM_013266007.3|	PREDICTED: Oreochromis niloticus PHD finger protein 14 (phf14), transcript variant X6, mRNA	1	206	206	exon-intron-
NC_031985.2	35529287	35529646	gi|674749515|gb|KF601827.1|	Oreochromis niloticus thioredoxin-interacting protein mRNA, complete cds	1	390	390	exon-
NC_031985.2	32786723	32787209	gi|1434990453|ref|XM_025902130.1|	PREDICTED: Oreochromis niloticus trafficking protein particle complex 9 (trappc9), transcript variant X2, mRNA	1	517	517	exon-intron-exon-
NC_031985.2	32704422	32723708	gi|118495715|dbj|AB270897.1|	Oreochromis niloticus MHC class IA antigen UBA1, UBA2, UAA1 genes, partial cds, UAA3 and UAA2 pseudogenes, UAA4, UAA5 and UAA6 pseudogene fragments	1	19317	19317	exon-exon-intron-
NC_031985.2	27873879	27878181	gi|1434991872|ref|XM_019350589.2|	PREDICTED: Oreochromis niloticus glutathione S-transferase A (LOC100700381), mRNA	1	4333	4333	exon-intron-exon-intron-exon-intron-exon-intron-exon-intergenic-exon-exon-
NC_031985.2	27852201	27859323	gi|498972233|ref|XM_004547784.1|	PREDICTED: Maylandia zebra glutathione S-transferase A (LOC101475730), mRNA	1	7153	7153	exon-exon-intron-exon-intron-exon-intron-exon-intron-exon-intergenic-
NC_031985.2	27837715	27859323	gi|1434991880|ref|XM_019350598.2|	PREDICTED: Oreochromis niloticus glutathione S-transferase A (LOC102075633), mRNA	1	21639	21639	exon-exon-exon-intergenic-exon-intron-exon-intron-exon-intron-exon-intron-exon-intron-exon-exon-intron-exon-intron-exon-intron-exon-intron-exon-intergenic-
NC_031985.2	27079468	27085263	gi|1434991516|ref|XM_025902309.1|	PREDICTED: Oreochromis niloticus CUB and Sushi multiple domains 2 (csmd2), transcript variant X2, mRNA	1	5826	5826	exon-exon-intron-
NC_031985.2	24436073	24436424	gi|930743217|ref|XM_014335585.1|	PREDICTED: Haplochromis burtoni collagen, type I, alpha 2 (col1a2), transcript variant X2, mRNA	1	382	382	exon-
NC_031985.2	24435673	24435837	gi|544583476|ref|NM_001282897.1|	Oreochromis niloticus collagen type I alpha 2 chain (col1a2), mRNA	1	195	195	exon-
NC_031985.2	24418953	24423104	gi|544583476|ref|NM_001282897.1|	Oreochromis niloticus collagen type I alpha 2 chain (col1a2), mRNA	1	4182	4182	exon-intron-exon-intron-exon-intron-exon-intron-exon-intron-exon-
NC_031985.2	24414362	24415297	gi|1434990806|ref|XR_267500.4|	NOT ASSIGNED	1	966	966	exon-
NC_031985.2	23901713	23902275	gi|930743201|ref|XM_014335584.1|	PREDICTED: Haplochromis burtoni sorting nexin 13 (snx13), transcript variant X2, mRNA	1	593	593	exon-intron-exon-intron-exon-
NC_031985.2	21231534	21233444	gi|1434991330|ref|XM_003444072.5|	PREDICTED: Oreochromis niloticus cyclase associated actin cytoskeleton regulatory protein 2 (cap2), mRNA	1	1941	1941	exon-intron-exon-intron-exon-
NC_031985.2	21224875	21231611	gi|1434991330|ref|XM_003444072.5|	PREDICTED: Oreochromis niloticus cyclase associated actin cytoskeleton regulatory protein 2 (cap2), mRNA	1	6767	6767	exon-intron-exon-intron-exon-intron-exon-
NC_031985.2	21224871	21231607	gi|1434991330|ref|XM_003444072.5|	PREDICTED: Oreochromis niloticus cyclase associated actin cytoskeleton regulatory protein 2 (cap2), mRNA	1	6767	6767	intron-exon-intron-exon-intron-exon-intron-exon-
NC_031985.2	21204618	21204995	gi|1434991251|ref|XM_005478518.4|	PREDICTED: Oreochromis niloticus nucleoporin 153 (nup153), transcript variant X2, mRNA	1	408	408	exon-intergenic-
NC_031985.2	20948128	20954652	gi|1434992801|ref|XM_019350449.2|	PREDICTED: Oreochromis niloticus tyrosyl-DNA phosphodiesterase 2 (LOC102081942), transcript variant X3, mRNA	1	6555	6555	exon-intergenic-exon-intron-exon-intron-exon-intron-exon-intron-exon-intron-exon-
NC_031985.2	20668218	20669684	gi|1434992789|ref|XM_005478489.4|	PREDICTED: Oreochromis niloticus zinc finger protein 704 (znf704), transcript variant X2, mRNA	1	1497	1497	exon-intron-exon-
NC_031985.2	19823323	19823650	gi|1434992590|ref|XM_003444101.5|	PREDICTED: Oreochromis niloticus zinc finger protein 706 (LOC100712275), mRNA	1	358	358	exon-
NC_031985.2	17999800	18033314	gi|118495715|dbj|AB270897.1|	Oreochromis niloticus MHC class IA antigen UBA1, UBA2, UAA1 genes, partial cds, UAA3 and UAA2 pseudogenes, UAA4, UAA5 and UAA6 pseudogene fragments	1	33545	33545	intron-exon-exon-intergenic-exon-intron-exon-intron-intron-exon-intron-exon-intron-exon-intron-exon-intron-exon-intron-exon-intron-exon-intron-exon-intergenic-exon-intron-exon-intron-exon-intron-exon-intron-exon-intron-exon-intron-exon-intron-exon-exon-intron-exon-intron-exon-intron-exon-intergenic-exon-intron-exon-exon-intron-exon-intron-exon-intron-exon-intron-exon-intron-exon-intron-exon-intro…
NC_031985.2	17999800	18024129	gi|118495715|dbj|AB270897.1|	Oreochromis niloticus MHC class IA antigen UBA1, UBA2, UAA1 genes, partial cds, UAA3 and UAA2 pseudogenes, UAA4, UAA5 and UAA6 pseudogene fragments	1	24360	24360	intron-exon-exon-intergenic-exon-intron-exon-intron-intron-exon-intron-exon-intron-exon-intron-exon-intron-exon-intron-exon-intron-exon-intron-exon-intergenic-exon-intron-exon-intron-exon-intron-exon-intron-exon-intron-exon-intron-exon-intron-exon-exon-intron-exon-intron-exon-exon-intron-
NC_031985.2	17999800	18010857	gi|1381403333|ref|XM_014413907.2|	PREDICTED: Maylandia zebra cytosolic non-specific dipeptidase (LOC101468783), mRNA	1	11088	11088	intron-exon-exon-intergenic-exon-intron-exon-intron-intron-exon-intron-exon-intron-exon-intron-exon-intron-exon-intron-exon-intron-exon-exon-
NC_031985.2	17610887	17611731	gi|1434992149|ref|XM_003452454.4|	PREDICTED: Oreochromis niloticus NADH:ubiquinone oxidoreductase core subunit V1 (ndufv1), mRNA	1	875	875	exon-intron-exon-intron-exon-intron-exon-
NC_031985.2	17420582	17420872	gi|1434993145|ref|XM_003452490.5|	PREDICTED: Oreochromis niloticus tol-Pal system protein TolA (LOC100709534), mRNA	1	321	321	exon-
NC_031985.2	16377729	16409682	gi|923835093|ref|XM_005740715.2|	PREDICTED: Pundamilia nyererei RNA-binding motif, single-stranded-interacting protein 3-like (LOC102200034), transcript variant X3, mRNA	1	31984	31984	exon-exon-exon-intron-intron-
NC_031985.2	15925504	15926010	gi|1434992206|ref|XM_003452426.5|	PREDICTED: Oreochromis niloticus tetranectin (LOC100691741), mRNA	1	537	537	exon-exon-
NC_031985.2	1203752	1204108	gi|1434991204|ref|XM_025902259.1|	PREDICTED: Oreochromis niloticus CDC42 small effector 1 (cdc42se1), transcript variant X3, mRNA	1	385	385	exon-
NC_031985.2	11610427	11639753	gi|699017842|gb|KM264000.1|	Neolamprologus sexfasciatus isolate Neosex_fhl2b_AFC-SINE- fhl2b gene upstream region genomic sequence	1	29357	29357	exon-intron-exon-intron-exon-intron-exon-exon-exon-exon-exon-intron-exon-intron-exon-intron-exon-intron-intergenic-
NC_031985.2	11606407	11639753	gi|699017842|gb|KM264000.1|	Neolamprologus sexfasciatus isolate Neosex_fhl2b_AFC-SINE- fhl2b gene upstream region genomic sequence	1	33377	33377	exon-intron-exon-intron-exon-intron-exon-intron-exon-intron-exon-intron-exon-intron-exon-intron-exon-intron-exon-intron-exon-intron-exon-intron-exon-exon-exon-exon-exon-intron-exon-intron-exon-intron-exon-intron-intergenic-
NC_031985.2	11606407	11609906	gi|525343124|ref|NM_001279647.1|	Oreochromis niloticus elongation factor 1a (ef-1a), mRNA	1	3530	3530	exon-intron-exon-intron-exon-intron-exon-intron-exon-intron-exon-intron-exon-intron-exon-intron-exon-
NC_031985.2	11597770	11602646	gi|1434991305|ref|XM_019350634.2|	PREDICTED: Oreochromis niloticus elongation factor 1-alpha (LOC106096996), mRNA	1	4907	4907	exon-exon-intron-exon-intron-
NC_031984.2	8860985	8861164	gi|1434986002|ref|XM_005448435.3|	PREDICTED: Oreochromis niloticus C4b-binding protein alpha chain (LOC100710376), transcript variant X7, mRNA	1	208	208	exon-
NC_031984.2	8778754	8793185	gi|1434985953|ref|XM_025901378.1|	PREDICTED: Oreochromis niloticus membrane-associated guanylate kinase, WW and PDZ domain-containing protein 3 (LOC100709574), transcript variant X3, mRNA	1	14460	14460	exon-exon-intron-exon-intron-
NC_031984.2	8614962	8617459	gi|1434986997|ref|XM_025901623.1|	PREDICTED: Oreochromis niloticus heparan sulfate proteoglycan 2 (hspg2), transcript variant X13, mRNA	1	2526	2526	exon-intron-exon-intron-exon-intron-exon-intron-exon-intron-exon-intron-exon-
NC_031984.2	6755086	6755388	gi|583997916|ref|XM_006793985.1|	PREDICTED: Neolamprologus brichardi probable Bax inhibitor 1-like (LOC102798441), transcript variant X3, mRNA	1	331	331	exon-intergenic-
NC_031984.2	4531533	4532595	gi|1434989026|ref|XM_019349722.2|	PREDICTED: Oreochromis niloticus sodium- and chloride-dependent creatine transporter 1 (LOC100704248), transcript variant X3, mRNA	1	1091	1091	exon-intron-exon-intron-exon-
NC_031984.2	4519550	4524223	gi|1434989026|ref|XM_019349722.2|	PREDICTED: Oreochromis niloticus sodium- and chloride-dependent creatine transporter 1 (LOC100704248), transcript variant X3, mRNA	1	4702	4702	exon-exon-intron-exon-intron-
NC_031984.2	37049258	37070704	gi|927653526|gb|KT688694.1|	Cheilochromis euchilus voucher C. Darrin Hulsey:4812 ultra conserved element locus uce-575 genomic sequence	1	21477	21477	exon-exon-exon-intron-exon-intron-
NC_031984.2	35582665	35589644	gi|1059791593|gb|AH013711.2|	Oreochromis niloticus KLR3 (KLR3) gene, exons 2 through 7; KLR2 pseudogene, partial sequence; KLR1 gene, complete sequence; KLR4 (KLR4) gene, exons 2 through 7; KLR5 (KLR5) gene, exons 1 through 7; KLR6 and KLR7 pseudogenes, complete sequence; KLR9 (KLR10) pseudogene, exons 4 through 7; KLR8 pseudogene, partial sequence; KLR9 (KLR9) gene, exons 1 through 7; C-type lectin (CLECT2)-like protein gen…	1	7010	7010	exon-exon-intron-exon-intron-
NC_031984.2	34388516	34389012	gi|1434987557|ref|XM_019349810.2|	PREDICTED: Oreochromis niloticus vacuolar protein sorting 13 homolog D (vps13d), transcript variant X3, mRNA	1	527	527	exon-intron-exon-
NC_031984.2	30085287	30087210	gi|1434988714|ref|XM_005454081.4|	PREDICTED: Oreochromis niloticus solute carrier family 41 member 3 (LOC100695043), transcript variant X5, mRNA	1	1954	1954	exon-intron-exon-intron-exon-
NC_031984.2	28871775	28879522	gi|1434989738|ref|XM_003449124.5|	PREDICTED: Oreochromis niloticus catenin beta like 1 (ctnnbl1), mRNA	1	7778	7778	exon-intron-exon-intron-exon-intron-exon-intron-exon-
NC_031984.2	28380301	28410421	gi|1468907580|ref|XM_026153218.1|	PREDICTED: Astatotilapia calliptera angiopoietin like 7 (angptl7), mRNA	1	30151	30151	exon-intron-exon-intron-exon-intron-exon-intron-exon-intron-exon-intron-exon-intron-exon-exon-intron-exon-intron-exon-intron-exon-intron-exon-exon-intron-intron-
NC_031984.2	28004379	28005239	gi|1434989654|ref|XM_005454131.3|	PREDICTED: Oreochromis niloticus adenosine monophosphate deaminase 1 (ampd1), transcript variant X3, mRNA	1	891	891	exon-intron-exon-intron-exon-
NC_031984.2	23834008	23835346	gi|1434988642|ref|XM_013271151.3|	PREDICTED: Oreochromis niloticus PR/SET domain 16 (prdm16), mRNA	1	1369	1369	exon-intron-exon-intron-exon-intron-exon-
NC_031984.2	22067641	22068248	gi|1434988765|ref|XM_003444805.5|	PREDICTED: Oreochromis niloticus calsyntenin 1 (clstn1), transcript variant X4, mRNA	1	638	638	exon-intron-exon-
NC_031984.2	20052013	20054158	gi|31088221|dbj|AB097255.1|	Oryzias latipes mRNA for SMC1 alpha, partial cds	1	2176	2176	exon-intron-exon-intron-exon-intron-exon-exon-intron-
NC_031984.2	20039486	20039976	gi|1434986526|ref|XM_003448235.5|	PREDICTED: Oreochromis niloticus calcium voltage-gated channel subunit alpha1 S (cacna1s), transcript variant X2, mRNA	1	521	521	exon-intron-exon-intron-exon-
NC_031984.2	18225407	18225553	gi|1434986378|ref|XM_003448205.5|	PREDICTED: Oreochromis niloticus mitochondrial glutamate carrier 1 (LOC100696012), mRNA	1	177	177	exon-
NC_031984.2	16974198	17057133	gi|1434909765|ref|XM_019356931.2|	PREDICTED: Oreochromis niloticus retrovirus-related Pol polyprotein from transposon 412 (LOC102082344), transcript variant X1, mRNA	1	82966	82966	exon-intron-exon-intron-exon-intron-exon-intron-exon-intron-exon-intergenic-exon-intron-exon-intron-exon-intron-exon-intron-exon-intron-exon-intron-exon-intron-exon-intron-exon-intron-exon-intron-exon-intron-exon-intron-exon-intron-exon-intron-exon-intron-exon-exon-intron-exon-intron-exon-exon-intron-exon-intron-exon-intron-exon-intron-exon-intron-exon-exon-intron-exon-intron-exon-intron-intron-i…
NC_031984.2	16613478	16615601	gi|1434987242|ref|XM_019349560.2|	PREDICTED: Oreochromis niloticus zinc fingers and homeoboxes protein 3 (LOC100704314), transcript variant X3, mRNA	1	2154	2154	intron-exon-exon-
NC_031984.2	15224199	15225087	gi|1434987775|ref|XM_025901766.1|	PREDICTED: Oreochromis niloticus glutamate receptor-interacting protein 2 (LOC100699182), transcript variant X7, mRNA	1	919	919	exon-exon-intron-exon-
NC_031984.2	13024270	13026867	gi|930740112|ref|XM_005926162.2|	PREDICTED: Haplochromis burtoni death inducer-obliterator 1 (dido1), transcript variant X3, mRNA	1	2628	2628	exon-intron-exon-intron-intron-exon-exon-intron-exon-exon-intron-exon-exon-
NC_031984.2	12581166	12583985	gi|1434989004|ref|XM_003438803.5|	PREDICTED: Oreochromis niloticus glutaminase kidney isoform, mitochondrial (LOC100704850), mRNA	1	2850	2850	exon-intron-exon-exon-intron-exon-intron-exon-intron-
NC_031983.2	9786806	9788646	gi|548423190|ref|XM_005742730.1|	PREDICTED: Pundamilia nyererei RAS guanyl releasing protein 1 (calcium and DAG-regulated) (rasgrp1), mRNA	1	1869	1869	exon-intron-exon-intron-exon-
NC_031983.2	5617587	5618696	gi|1468902803|ref|XM_026152943.1|	PREDICTED: Astatotilapia calliptera spectrin repeat containing nuclear envelope protein 2 (syne2), mRNA	1	1138	1138	exon-intron-
NC_031983.2	4961483	4975778	gi|1434997324|ref|XM_025903455.1|	PREDICTED: Oreochromis niloticus neoverrucotoxin subunit alpha-like (LOC112843957), mRNA	1	14324	14324	exon-intron-exon-exon-intron-
NC_031983.2	30813628	30814989	gi|1434942737|ref|XM_003444416.5|	PREDICTED: Oreochromis niloticus sarcosine dehydrogenase (sardh), transcript variant X2, mRNA	1	1392	1392	exon-intron-exon-intron-exon-intron-exon-intron-exon-
NC_031983.2	28298946	28304643	gi|1434983808|ref|XM_019349011.2|	PREDICTED: Oreochromis niloticus collagen alpha-1(XII) chain (LOC100698485), transcript variant X5, mRNA	1	5728	5728	exon-intron-exon-intron-exon-intron-exon-intron-exon-intron-exon-intron-exon-
NC_031983.2	2716368	2720714	gi|1434985152|ref|XM_013266070.3|	PREDICTED: Oreochromis niloticus bromodomain adjacent to zinc finger domain 1A (baz1a), transcript variant X3, mRNA	1	4375	4375	exon-intron-exon-intron-exon-intron-exon-exon-intron-exon-intron-exon-intron-exon-intron-
NC_031983.2	26911851	26994236	gi|1434984061|ref|XM_013271953.3|	PREDICTED: Oreochromis niloticus BSD domain containing 1 (bsdc1), mRNA	1	82416	82416	intron-exon-exon-intron-exon-intron-exon-intron-exon-intron-exon-intron-exon-intron-exon-intron-exon-intergenic-
NC_031983.2	26804436	26810832	gi|1434983599|ref|XM_005477608.4|	PREDICTED: Oreochromis niloticus apoptosis-stimulating of p53 protein 1 (LOC100705495), transcript variant X3, mRNA	1	6427	6427	exon-intron-exon-intron-exon-
NC_031983.2	23355273	23360374	gi|1434982755|ref|XM_013271503.3|	PREDICTED: Oreochromis niloticus ribokinase (rbks), transcript variant X4, mRNA	1	5132	5132	exon-intron-exon-intron-exon-intron-exon-
NC_031983.2	22346989	22348856	gi|1434985360|ref|XM_005477470.4|	PREDICTED: Oreochromis niloticus solute carrier family 8 member A3 (slc8a3), transcript variant X3, mRNA	1	1898	1898	exon-exon-
NC_031983.2	21185948	21186086	gi|930766783|ref|XM_005947302.2|	PREDICTED: Haplochromis burtoni potassium channel, two pore domain subfamily K, member 9 (kcnk9), mRNA	1	169	169	intron-
NC_031983.2	21185941	21186079	gi|1434928439|ref|XM_019359783.2|	PREDICTED: Oreochromis niloticus ubiquitin carboxyl-terminal hydrolase 26-like (LOC102080914), transcript variant X3, mRNA	1	169	169	intron-
NC_031983.2	20826614	20826749	gi|584007517|ref|XM_006798667.1|	PREDICTED: Neolamprologus brichardi beta-taxilin-like (LOC102779663), mRNA	1	166	166	exon-
NC_031983.2	19155011	19184161	gi|1434984527|ref|XM_003443030.5|	PREDICTED: Oreochromis niloticus cysteine-rich protein 2 (LOC100695290), mRNA	1	29181	29181	exon-intron-exon-intron-exon-exon-intergenic-
NC_031983.2	10572422	10620160	gi|118495715|dbj|AB270897.1|	Oreochromis niloticus MHC class IA antigen UBA1, UBA2, UAA1 genes, partial cds, UAA3 and UAA2 pseudogenes, UAA4, UAA5 and UAA6 pseudogene fragments	1	47769	47769	exon-intron-exon-intron-exon-intergenic-exon-intron-exon-intron-exon-intron-exon-intron-exon-intron-exon-intergenic-exon-intron-exon-intron-exon-intron-exon-intron-exon-intron-exon-exon-intron-exon-intron-exon-intron-exon-intron-exon-intron-exon-intergenic-exon-intron-exon-intron-exon-intron-exon-intron-exon-intron-exon-exon-intron-exon-intron-exon-intron-exon-intergenic-exon-intron-exon-exon-int…
NC_031982.2	8631817	8642086	gi|1434982073|ref|XM_019347438.2|	PREDICTED: Oreochromis niloticus transferrin receptor protein 1 (LOC102081239), mRNA	1	10298	10298	exon-intron-exon-intron-exon-intron-exon-intron-exon-exon-exon-exon-intron-exon-intron-exon-intron-exon-intron-exon-intron-exon-intron-exon-intron-exon-intron-exon-intron-exon-intron-exon-intron-
NC_031982.2	4981461	4988278	gi|1434978596|ref|XM_005464960.4|	PREDICTED: Oreochromis niloticus amylo-alpha-1, 6-glucosidase, 4-alpha-glucanotransferase (agl), transcript variant X3, mRNA	1	6846	6846	exon-intron-exon-intron-exon-intron-exon-intron-exon-intron-exon-intron-exon-intron-exon-intron-exon-intron-exon-intron-exon-intron-exon-
NC_031982.2	34894964	34895533	gi|1434979746|ref|XM_005476858.4|	PREDICTED: Oreochromis niloticus pre-mRNA 3' end processing protein WDR33 (LOC100693575), transcript variant X3, mRNA	1	600	600	exon-intron-exon-intron-exon-
NC_031982.2	34117603	34118973	gi|1434979728|ref|XM_005464201.4|	PREDICTED: Oreochromis niloticus ras GTPase-activating protein nGAP (LOC100701601), mRNA	1	1401	1401	exon-intron-exon-intron-exon-
NC_031982.2	34113913	34127018	gi|1434979728|ref|XM_005464201.4|	PREDICTED: Oreochromis niloticus ras GTPase-activating protein nGAP (LOC100701601), mRNA	1	13136	13136	exon-intron-exon-intron-exon-intron-exon-intron-exon-intron-exon-intron-exon-intron-exon-intron-exon-
NC_031982.2	31549359	31549492	gi|1434980556|ref|XM_003459075.5|	PREDICTED: Oreochromis niloticus mammalian ependymin-related protein 1 (LOC100695618), mRNA	1	164	164	exon-
NC_031982.2	27199427	27203702	gi|1434978853|ref|XM_019348045.2|	PREDICTED: Oreochromis niloticus supervillin (LOC100703985), transcript variant X13, mRNA	1	4306	4306	exon-intron-exon-intron-exon-intron-exon-intron-exon-intron-exon-intron-exon-
NC_031982.2	26971821	26972038	gi|1434980260|ref|XM_005476752.4|	PREDICTED: Oreochromis niloticus myelin protein zero (mpz), transcript variant X3, mRNA	1	248	248	exon-
NC_031982.2	26429583	26429868	gi|1434981903|ref|XM_005476731.3|	PREDICTED: Oreochromis niloticus zinc finger protein 184 (LOC102082686), transcript variant X2, mRNA	1	316	316	exon-exon-
NC_031982.2	25980059	26026998	gi|1381384467|ref|XM_012920245.3|	PREDICTED: Maylandia zebra microtubule-associated protein futsch (LOC101470030), transcript variant X6, mRNA	1	46970	46970	exon-intron-exon-intron-exon-intron-exon-intron-exon-intron-exon-intron-exon-intron-exon-intron-exon-intron-exon-intron-exon-intron-exon-intron-exon-intron-exon-exon-intron-exon-intron-exon-intron-exon-intron-exon-intron-exon-intron-exon-exon-intergenic-exon-intron-exon-intron-exon-intron-exon-intron-exon-intron-exon-intron-exon-intron-exon-exon-intron-exon-intron-exon-intron-exon-intron-exon-int…
NC_031982.2	25294887	25297910	gi|1434981823|ref|XM_003448450.4|	PREDICTED: Oreochromis niloticus DnaJ heat shock protein family (Hsp40) member B4 (dnajb4), mRNA	1	3054	3054	exon-exon-intron-
NC_031982.2	25218381	25221416	gi|1434981777|ref|XM_019347941.2|	PREDICTED: Oreochromis niloticus zinc finger FYVE-type containing 9 (zfyve9), transcript variant X6, mRNA	1	3066	3066	exon-intron-exon-intron-exon-
NC_031982.2	23105205	23105675	gi|1434980878|ref|XM_003448490.4|	PREDICTED: Oreochromis niloticus complexin-4 (LOC100705335), transcript variant X1, mRNA	1	501	501	exon-exon-exon-intron-
NC_031982.2	23105201	23105671	gi|1434980878|ref|XM_003448490.4|	PREDICTED: Oreochromis niloticus complexin-4 (LOC100705335), transcript variant X1, mRNA	1	501	501	exon-exon-exon-
NC_031982.2	22933984	22934532	gi|1434979108|ref|XM_005476595.4|	PREDICTED: Oreochromis niloticus insulin receptor (LOC100696191), mRNA	1	579	579	exon-
NC_031982.2	2148833	2163108	gi|118495715|dbj|AB270897.1|	Oreochromis niloticus MHC class IA antigen UBA1, UBA2, UAA1 genes, partial cds, UAA3 and UAA2 pseudogenes, UAA4, UAA5 and UAA6 pseudogene fragments	1	14304	14304	exon-intron-exon-intron-exon-intron-exon-intron-exon-intron-exon-intron-exon-intron-exon-exon-intron-
NC_031982.2	21330874	21331033	gi|1434981244|ref|XM_025900479.1|	PREDICTED: Oreochromis niloticus EMILIN-2 (LOC102078517), transcript variant X2, mRNA	1	190	190	exon-
NC_031982.2	19077768	19078862	gi|1434981712|ref|XM_025900576.1|	PREDICTED: Oreochromis niloticus obscurin, cytoskeletal calmodulin and titin-interacting RhoGEF (obscn), transcript variant X14, mRNA	1	1125	1125	exon-intron-exon-intron-exon-
NC_031982.2	19077768	19078446	gi|1434981712|ref|XM_025900576.1|	PREDICTED: Oreochromis niloticus obscurin, cytoskeletal calmodulin and titin-interacting RhoGEF (obscn), transcript variant X14, mRNA	1	709	709	exon-intron-exon-
NC_031982.2	19077768	19078034	gi|1434981712|ref|XM_025900576.1|	PREDICTED: Oreochromis niloticus obscurin, cytoskeletal calmodulin and titin-interacting RhoGEF (obscn), transcript variant X14, mRNA	1	297	297	exon-
NC_031982.2	16980759	16986758	gi|930723540|ref|XM_014332625.1|	PREDICTED: Haplochromis burtoni zinc finger protein 521 (znf521), transcript variant X5, mRNA	1	6030	6030	exon-intron-exon-
NC_031982.2	15091152	15106042	gi|1434978762|ref|XM_005476264.4|	PREDICTED: Oreochromis niloticus glypican-5 (LOC102077503), transcript variant X3, mRNA	1	14921	14921	exon-intron-exon-intron-exon-intron-exon-
NC_031982.2	15091152	15093159	gi|1434978762|ref|XM_005476264.4|	PREDICTED: Oreochromis niloticus glypican-5 (LOC102077503), transcript variant X3, mRNA	1	2038	2038	exon-intron-exon-intron-exon-
NC_031982.2	15066734	15106042	gi|1434978762|ref|XM_005476264.4|	PREDICTED: Oreochromis niloticus glypican-5 (LOC102077503), transcript variant X3, mRNA	1	39339	39339	exon-exon-intron-exon-intron-exon-intron-exon-intron-
NC_031982.2	15053320	15093159	gi|313150351|dbj|AB505452.1|	Rana rugosa got1 gene for glutamate oxaloacetate transaminase, partial cds	1	39870	39870	exon-exon-exon-intron-exon-intron-exon-intron-intron-
NC_031982.2	13474530	13474896	gi|1434980904|ref|XM_005476191.4|	PREDICTED: Oreochromis niloticus myomegalin (LOC100703940), transcript variant X9, mRNA	1	397	397	exon-intron-exon-intron-
NC_031982.2	13474527	13474893	gi|1434980904|ref|XM_005476191.4|	PREDICTED: Oreochromis niloticus myomegalin (LOC100703940), transcript variant X9, mRNA	1	397	397	exon-intron-exon-
NC_031982.2	11237776	11238071	gi|1434978910|ref|XM_025900041.1|	PREDICTED: Oreochromis niloticus anoctamin-8 (LOC100696049), transcript variant X6, mRNA	1	326	326	exon-exon-
NC_031981.2	9968664	9970229	gi|930741544|ref|XM_005927247.2|	PREDICTED: Haplochromis burtoni round spermatid basic protein 1-like protein (LOC102308177), mRNA	1	1594	1594	exon-intron-exon-
NC_031981.2	9648631	9650693	gi|1434976568|ref|XM_005451704.4|	PREDICTED: Oreochromis niloticus anoctamin 6 (ano6), mRNA	1	2091	2091	exon-exon-intron-exon-intron-
NC_031981.2	9574942	9575613	gi|583970574|ref|XM_006780659.1|	PREDICTED: Neolamprologus brichardi ankyrin repeat and SOCS box protein 15-like (LOC102794655), mRNA	1	700	700	exon-intron-exon-intron-
NC_031981.2	9574939	9575610	gi|583970574|ref|XM_006780659.1|	PREDICTED: Neolamprologus brichardi ankyrin repeat and SOCS box protein 15-like (LOC102794655), mRNA	1	700	700	exon-intron-exon-
NC_031981.2	8027590	8028709	gi|583971540|ref|XM_006781129.1|	PREDICTED: Neolamprologus brichardi aldose reductase-like (LOC102797778), mRNA	1	1148	1148	exon-intron-exon-exon-intron-exon-intron-exon-intron-
NC_031981.2	519652	520499	gi|1434977304|ref|XM_003455636.5|	PREDICTED: Oreochromis niloticus beta-2-microglobulin (LOC100697370), mRNA	1	874	874	exon-intron-exon-
NC_031981.2	4034321	4047908	gi|1434975109|ref|XM_019346793.2|	PREDICTED: Oreochromis niloticus sodium-coupled monocarboxylate transporter 1 (LOC100708619), transcript variant X3, mRNA	1	13616	13616	exon-intron-exon-intergenic-exon-intron-exon-intergenic-exon-exon-exon-intron-exon-intron-exon-exon-intron-exon-intron-exon-intron-exon-intron-exon-intron-exon-intron-exon-intron-exon-intron-exon-intron-exon-intron-exon-exon-intron-exon-exon-intron-
NC_031981.2	37978522	37981100	gi|1434977029|ref|XM_003449744.5|	PREDICTED: Oreochromis niloticus SET binding factor 1 (sbf1), transcript variant X5, mRNA	1	2609	2609	exon-intron-exon-intron-exon-intron-exon-intron-exon-intron-exon-intron-exon-intron-exon-
NC_031981.2	37978522	37979543	gi|1434977029|ref|XM_003449744.5|	PREDICTED: Oreochromis niloticus SET binding factor 1 (sbf1), transcript variant X5, mRNA	1	1052	1052	exon-intron-exon-intron-exon-intron-exon-
NC_031981.2	3357628	3357793	gi|1434976288|ref|XM_003445045.5|	PREDICTED: Oreochromis niloticus metalloproteinase inhibitor 3 (LOC100696712), mRNA	1	194	194	exon-
NC_031981.2	32621271	32625908	gi|657578001|ref|XM_008294634.1|	PREDICTED: Stegastes partitus serine/threonine-protein phosphatase 2B catalytic subunit alpha isoform-like (LOC103366803), mRNA	1	4668	4668	intron-
NC_031981.2	32616550	32617575	gi|1434976301|ref|XM_025899546.1|	PREDICTED: Oreochromis niloticus synapse defective Rho GTPase homolog 2 (syde2), transcript variant X2, mRNA	1	1056	1056	exon-intron-exon-
NC_031981.2	31006425	31009796	gi|930737239|ref|XM_005923860.2|	PREDICTED: Haplochromis burtoni phosphatidylinositol-4,5-bisphosphate 3-kinase, catalytic subunit alpha (pik3ca), mRNA	1	3402	3402	exon-intron-exon-intron-exon-intron-exon-
NC_031981.2	27501135	27530082	gi|723802023|tpe|BN000676.1|	TPA: Xenopus tropicalis Tc1-like transposon, Beagle	1	28978	28978	exon-intergenic-exon-intron-exon-exon-exon-exon-intron-exon-intron-exon-intron-exon-exon-exon-intron-exon-intron-exon-intron-exon-intron-exon-exon-intergenic-intron-
NC_031981.2	27267347	27267889	gi|1434976297|ref|XM_003457295.5|	PREDICTED: Oreochromis niloticus GDP-mannose 4,6-dehydratase (gmds), mRNA	1	573	573	exon-intron-exon-
NC_031981.2	2606846	2610814	gi|1434978232|ref|XM_005451837.4|	PREDICTED: Oreochromis niloticus influenza virus NS1A binding protein (ivns1abp), transcript variant X2, mRNA	1	3997	3997	exon-intron-exon-intron-exon-intron-exon-intron-exon-intron-exon-intron-exon-
NC_031981.2	25243808	25298182	gi|118495715|dbj|AB270897.1|	Oreochromis niloticus MHC class IA antigen UBA1, UBA2, UAA1 genes, partial cds, UAA3 and UAA2 pseudogenes, UAA4, UAA5 and UAA6 pseudogene fragments	1	54405	54405	exon-intron-exon-intron-exon-intron-exon-intron-exon-intron-exon-exon-intron-exon-intron-exon-intron-exon-intron-exon-intron-intergenic-intergenic-
NC_031981.2	24626978	24627441	gi|1434977245|ref|XM_019346730.2|	PREDICTED: Oreochromis niloticus myomegalin (LOC102082068), transcript variant X10, mRNA	1	494	494	exon-intron-exon-
NC_031981.2	23170761	23180585	gi|1434977806|ref|XM_019346739.2|	PREDICTED: Oreochromis niloticus protein DENND6B (LOC106097677), mRNA	1	9855	9855	exon-intron-exon-intron-exon-intron-exon-intron-exon-intron-exon-exon-intron-exon-intron-exon-intron-exon-intron-exon-intron-exon-intron-exon-intron-exon-intron-exon-intron-exon-intron-exon-intron-exon-intron-exon-intron-exon-intron-exon-exon-exon-intron-exon-intron-exon-intron-exon-intron-exon-intron-exon-intron-exon-exon-intron-exon-intron-exon-intron-exon-
NC_031981.2	21430072	21442596	gi|1434976856|ref|XM_025899666.1|	PREDICTED: Oreochromis niloticus NACHT, LRR and PYD domains-containing protein 12 (LOC100692765), mRNA	1	12555	12555	exon-exon-intron-exon-intron-exon-intron-exon-intergenic-intron-
NC_031981.2	17253398	17256840	gi|723802023|tpe|BN000676.1|	TPA: Xenopus tropicalis Tc1-like transposon, Beagle	1	3473	3473	exon-intron-exon-intron-exon-intron-exon-
NC_031981.2	16326813	16329059	gi|1434976528|ref|XR_002056906.2|	PREDICTED: Oreochromis niloticus liprin-beta-1 (LOC100695320), transcript variant X2, misc_RNA	1	2277	2277	exon-intron-exon-
NC_031981.2	12846846	12855980	gi|1434975392|ref|XM_003444948.5|	PREDICTED: Oreochromis niloticus staphylococcal nuclease and tudor domain containing 1 (snd1), transcript variant X1, mRNA	1	9165	9165	exon-intron-exon-intron-exon-intron-exon-intron-
NC_031981.2	12846842	12855976	gi|1434975392|ref|XM_003444948.5|	PREDICTED: Oreochromis niloticus staphylococcal nuclease and tudor domain containing 1 (snd1), transcript variant X1, mRNA	1	9165	9165	exon-intron-exon-intron-exon-intron-exon-
NC_031981.2	12545456	12549945	gi|1434976347|ref|XM_019347071.2|	PREDICTED: Oreochromis niloticus voltage-dependent calcium channel subunit alpha-2/delta-1 (LOC100705144), transcript variant X6, mRNA	1	4520	4520	exon-intron-exon-intron-exon-
NC_031981.2	11770508	11771010	gi|1434978006|ref|XM_019346817.2|	PREDICTED: Oreochromis niloticus ATPase plasma membrane Ca2+ transporting 1 (atp2b1), transcript variant X3, mRNA	1	533	533	exon-
NC_031981.2	10991738	10992018	gi|1434976402|ref|XM_003445007.5|	PREDICTED: Oreochromis niloticus ubiquitin conjugating enzyme E2 H (ube2h), mRNA	1	311	311	exon-
NC_031981.2	10272056	10281829	gi|1434976700|ref|XR_003214533.1|	PREDICTED: Oreochromis niloticus ELKS/Rab6-interacting/CAST family member 1 (LOC100690550), transcript variant X11, misc_RNA	1	9804	9804	exon-exon-intron-exon-intron-exon-intron-
NC_031981.2	10238150	10281829	gi|1434976128|ref|XM_005451686.4|	PREDICTED: Oreochromis niloticus trichohyalin-like (LOC102077753), mRNA	1	43710	43710	exon-exon-exon-intron-exon-intron-exon-intron-intron-
NC_031980.2	9975182	9975434	gi|1434970462|ref|XM_003449857.5|	PREDICTED: Oreochromis niloticus N-lysine methyltransferase SMYD2 (LOC100693266), mRNA	1	281	281	exon-
NC_031980.2	896114	897054	gi|930729063|ref|XM_005917127.2|	PREDICTED: Haplochromis burtoni serine/threonine-protein kinase MRCK alpha-like (LOC102297448), transcript variant X4, mRNA	1	967	967	exon-intron-exon-intron-exon-intron-exon-
NC_031980.2	8249090	8257030	gi|1434971376|ref|XM_025899307.1|	PREDICTED: Oreochromis niloticus deleted in malignant brain tumors 1 protein (LOC102083301), transcript variant X4, mRNA	1	7969	7969	exon-intron-exon-intron-exon-intergenic-exon-exon-exon-intron-exon-intron-exon-intron-exon-intron-
NC_031980.2	7546934	7547656	gi|1434968558|ref|XM_005449592.3|	PREDICTED: Oreochromis niloticus neuroblastoma amplified sequence (nbas), transcript variant X2, mRNA	1	751	751	exon-intron-exon-
NC_031980.2	6660212	6662876	gi|1434967913|ref|XM_013268824.3|	PREDICTED: Oreochromis niloticus tumor protein D52 like 1 (tpd52l1), transcript variant X7, mRNA	1	2693	2693	exon-intron-exon-intron-exon-
NC_031980.2	6495031	6495347	gi|1434907202|ref|XM_025898949.1|	PREDICTED: Oreochromis niloticus protocadherin alpha-8-like (LOC112842411), mRNA	1	345	345	intron-
NC_031980.2	6476381	6500453	gi|1434907202|ref|XM_025898949.1|	PREDICTED: Oreochromis niloticus protocadherin alpha-8-like (LOC112842411), mRNA	1	24101	24101	exon-intron-exon-intron-exon-exon-intron-exon-intron-exon-intron-exon-exon-intron-
NC_031980.2	6361994	6362293	gi|1434968563|ref|XM_005449659.4|	PREDICTED: Oreochromis niloticus A-kinase anchoring protein 7 (akap7), transcript variant X3, mRNA	1	328	328	exon-
NC_031980.2	5312258	5312472	gi|923785186|ref|XM_013908748.1|	PREDICTED: Pundamilia nyererei heat shock protein HSP 90-alpha 1 (LOC102211074), transcript variant X3, mRNA	1	243	243	intron-
NC_031980.2	5312230	5312444	gi|923785186|ref|XM_013908748.1|	PREDICTED: Pundamilia nyererei heat shock protein HSP 90-alpha 1 (LOC102211074), transcript variant X3, mRNA	1	243	243	exon-intron-
NC_031980.2	4842699	4843004	gi|1434968434|ref|XM_003440652.5|	PREDICTED: Oreochromis niloticus FAU, ubiquitin like and ribosomal protein S30 fusion (fau), mRNA	1	334	334	exon-intron-exon-
NC_031980.2	36591399	36607322	gi|1434967557|ref|XM_025898628.1|	PREDICTED: Oreochromis niloticus adhesion G protein-coupled receptor L2 (adgrl2), transcript variant X32, mRNA	1	15954	15954	exon-exon-intron-
NC_031980.2	32787027	32789391	gi|583993873|ref|XM_006792024.1|	PREDICTED: Neolamprologus brichardi trimeric intracellular cation channel type A-like (LOC102777740), mRNA	1	2395	2395	exon-intron-exon-intron-exon-intron-exon-
NC_031980.2	32787027	32788634	gi|583993873|ref|XM_006792024.1|	PREDICTED: Neolamprologus brichardi trimeric intracellular cation channel type A-like (LOC102777740), mRNA	1	1638	1638	exon-intron-exon-intron-exon-
NC_031980.2	32035591	32036179	gi|1434967583|ref|XM_003449031.5|	PREDICTED: Oreochromis niloticus arrestin domain containing 2 (arrdc2), transcript variant X3, mRNA	1	619	619	exon-
NC_031980.2	31689518	31695092	gi|930773658|ref|XM_014331134.1|	PREDICTED: Haplochromis burtoni CD2-associated protein-like (LOC102289305), mRNA	1	5605	5605	exon-intron-exon-intron-exon-
NC_031980.2	31599424	31604012	gi|1434969814|ref|XM_025899049.1|	PREDICTED: Oreochromis niloticus TNF receptor superfamily member 21 (tnfrsf21), transcript variant X2, mRNA	1	4619	4619	exon-intron-exon-
NC_031980.2	30988345	30992115	gi|1434970356|ref|XM_019345682.2|	PREDICTED: Oreochromis niloticus REV3 like, DNA directed polymerase zeta catalytic subunit (rev3l), transcript variant X2, mRNA	1	3801	3801	exon-intron-exon-intron-exon-intron-exon-
NC_031980.2	2895479	2928861	gi|118495715|dbj|AB270897.1|	Oreochromis niloticus MHC class IA antigen UBA1, UBA2, UAA1 genes, partial cds, UAA3 and UAA2 pseudogenes, UAA4, UAA5 and UAA6 pseudogene fragments	1	33411	33411	exon-intron-exon-intron-exon-intron-exon-intron-exon-intron-exon-intron-exon-intron-exon-intron-exon-intergenic-intron-exon-intron-exon-intron-exon-intron-exon-intron-exon-intron-exon-intron-exon-intron-exon-exon-exon-intron-exon-intron-exon-intron-exon-intron-exon-intron-exon-intron-exon-intron-exon-exon-intergenic-exon-exon-intron-exon-intron-exon-intron-exon-intron-exon-intron-exon-intron-exon…
NC_031980.2	26941650	26950427	gi|1434968783|ref|XM_005460228.4|	PREDICTED: Oreochromis niloticus ankyrin repeat and SOCS box protein 2 (LOC100706505), transcript variant X5, mRNA	1	8808	8808	exon-intron-exon-intron-exon-intron-exon-intron-exon-intron-exon-intron-exon-
NC_031980.2	26908108	26910014	gi|1434968764|ref|XM_025898869.1|	PREDICTED: Oreochromis niloticus putative E3 ubiquitin-protein ligase UBR7 (LOC100699512), transcript variant X5, mRNA	1	1937	1937	exon-intron-exon-intron-exon-
NC_031980.2	24574048	24574187	gi|1434970550|ref|XM_003446678.5|	PREDICTED: Oreochromis niloticus taxilin beta (txlnb), transcript variant X3, mRNA	1	170	170	exon-
NC_031980.2	24570073	24570237	gi|1434970550|ref|XM_003446678.5|	PREDICTED: Oreochromis niloticus taxilin beta (txlnb), transcript variant X3, mRNA	1	195	195	exon-
NC_031980.2	24569080	24569221	gi|1434970550|ref|XM_003446678.5|	PREDICTED: Oreochromis niloticus taxilin beta (txlnb), transcript variant X3, mRNA	1	172	172	exon-
NC_031980.2	22065317	22066199	gi|1434968556|ref|XM_013272260.3|	PREDICTED: Oreochromis niloticus AN1-type zinc finger protein 3 (LOC100698322), mRNA	1	913	913	exon-
NC_031980.2	21553142	21553361	gi|1049260762|ref|XM_017714695.1|	PREDICTED: Pygocentrus nattereri hydroperoxide isomerase ALOXE3-like (LOC108437541), mRNA	1	250	250	intergenic-
NC_031980.2	20917080	20917286	gi|1434967928|ref|XM_025898699.1|	PREDICTED: Oreochromis niloticus triadin (LOC106096953), transcript variant X6, mRNA	1	237	237	exon-
NC_031980.2	15616139	15623949	gi|1434968573|ref|XM_019345954.2|	PREDICTED: Oreochromis niloticus laminin subunit alpha 2 (lama2), transcript variant X9, mRNA	1	7841	7841	exon-intron-exon-intron-exon-exon-intron-exon-intron-exon-intron-exon-
NC_031979.2	6667236	6669122	gi|1434965347|ref|XM_005460993.4|	PREDICTED: Oreochromis niloticus putative serine protease K12H4.7 (LOC100705895), mRNA	1	1915	1915	exon-exon-intron-exon-intron-
NC_031979.2	5822571	5822817	gi|1434966483|ref|XM_005461019.4|	PREDICTED: Oreochromis niloticus large neutral amino acids transporter small subunit 4 (LOC100708831), transcript variant X3, mRNA	1	275	275	exon-
NC_031979.2	5190613	5198088	gi|1468910919|ref|XM_026154972.1|	PREDICTED: Astatotilapia calliptera tripartite motif-containing protein 54-like (LOC113013803), transcript variant X7, mRNA	1	7504	7504	exon-exon-intron-exon-intron-
NC_031979.2	4492615	4495075	gi|1468879654|ref|XM_026193492.1|	PREDICTED: Astatotilapia calliptera Na(+)/H(+) exchange regulatory cofactor NHE-RF3-like (LOC113036904), mRNA	1	2489	2489	exon-intron-exon-intron-exon-intron-exon-
NC_031979.2	39586020	39592536	gi|118495715|dbj|AB270897.1|	Oreochromis niloticus MHC class IA antigen UBA1, UBA2, UAA1 genes, partial cds, UAA3 and UAA2 pseudogenes, UAA4, UAA5 and UAA6 pseudogene fragments	1	6547	6547	exon-intron-exon-intron-exon-
NC_031979.2	35037535	35037730	gi|1434965342|ref|XM_005461143.4|	PREDICTED: Oreochromis niloticus WD repeat-containing protein 20 (LOC100709106), mRNA	1	226	226	exon-
NC_031979.2	35013862	35016025	gi|923847711|ref|XM_013913810.1|	PREDICTED: Pundamilia nyererei hypoxia-inducible factor 1-alpha-like (LOC102195817), mRNA	1	2194	2194	exon-intron-exon-
NC_031979.2	34741435	34746324	gi|1434964535|ref|XM_003456381.4|	PREDICTED: Oreochromis niloticus creatine kinase M-type (LOC100702938), mRNA	1	4920	4920	exon-intron-exon-intron-exon-intron-exon-intron-exon-intron-exon-intron-exon-intron-exon-intron-exon-
NC_031979.2	34495886	34496046	gi|1434964182|ref|XM_025897982.1|	PREDICTED: Oreochromis niloticus neuroblast differentiation-associated protein AHNAK (LOC109205095), transcript variant X2, mRNA	1	191	191	exon-
NC_031979.2	34493900	34494100	gi|1434964182|ref|XM_025897982.1|	PREDICTED: Oreochromis niloticus neuroblast differentiation-associated protein AHNAK (LOC109205095), transcript variant X2, mRNA	1	231	231	exon-
NC_031979.2	34481867	34482001	gi|1434963946|ref|XM_019367204.2|	PREDICTED: Oreochromis niloticus neuroblast differentiation-associated protein AHNAK (LOC100705366), mRNA	1	165	165	exon-
NC_031979.2	33567608	33590573	gi|1434964623|ref|XM_019345203.2|	PREDICTED: Oreochromis niloticus ryanodine receptor 1 (LOC100709030), transcript variant X19, mRNA	1	22996	22996	exon-intron-exon-intron-exon-intron-exon-intron-exon-intron-exon-intron-exon-intron-exon-intron-exon-intron-exon-exon-intron-exon-intron-exon-intron-exon-intron-exon-intron-exon-intron-exon-intron-exon-intron-exon-intron-exon-intron-exon-intron-exon-intron-exon-intron-exon-intron-exon-intron-exon-intron-exon-intron-exon-intron-exon-intron-exon-intron-exon-intron-exon-exon-intron-exon-intron-exon-…
NC_031979.2	33566995	33567331	gi|1434964623|ref|XM_019345203.2|	PREDICTED: Oreochromis niloticus ryanodine receptor 1 (LOC100709030), transcript variant X19, mRNA	1	367	367	exon-intron-exon-
NC_031979.2	33563554	33563820	gi|1434964623|ref|XM_019345203.2|	PREDICTED: Oreochromis niloticus ryanodine receptor 1 (LOC100709030), transcript variant X19, mRNA	1	297	297	exon-
NC_031979.2	3312024	3324963	gi|1434966285|ref|XM_019367617.2|	PREDICTED: Oreochromis niloticus BCAS3, microtubule associated cell migration factor (bcas3), transcript variant X8, mRNA	1	12968	12968	exon-intron-exon-intron-exon-intron-exon-intron-exon-intron-exon-
NC_031979.2	28108141	28109987	gi|118495715|dbj|AB270897.1|	Oreochromis niloticus MHC class IA antigen UBA1, UBA2, UAA1 genes, partial cds, UAA3 and UAA2 pseudogenes, UAA4, UAA5 and UAA6 pseudogene fragments	1	1877	1877	exon-intron-exon-intron-
NC_031979.2	28051026	28074886	gi|1381374453|ref|XM_004544086.2|	PREDICTED: Maylandia zebra C5a anaphylatoxin chemotactic receptor 1-like (LOC101484375), mRNA	1	23891	23891	exon-intergenic-exon-intron-exon-exon-intron-exon-intron-exon-intergenic-exon-intron-exon-intron-exon-intron-exon-intron-exon-intron-exon-intergenic-
NC_031979.2	28044122	28074886	gi|1381374453|ref|XM_004544086.2|	PREDICTED: Maylandia zebra C5a anaphylatoxin chemotactic receptor 1-like (LOC101484375), mRNA	1	30795	30795	exon-exon-intergenic-exon-intron-exon-intron-exon-intron-exon-intron-exon-intron-intron-exon-intergenic-exon-intron-exon-exon-intron-exon-intron-exon-intergenic-exon-intron-exon-intron-exon-intron-exon-intron-exon-intron-exon-intergenic-exon-
NC_031979.2	24606047	24609702	gi|1434964710|ref|XM_005459297.4|	PREDICTED: Oreochromis niloticus membrane metalloendopeptidase (mme), transcript variant X3, mRNA	1	3686	3686	exon-intron-exon-intron-exon-exon-intron-
NC_031979.2	24409389	24409559	gi|1434964732|ref|XM_025898110.1|	PREDICTED: Oreochromis niloticus muscleblind like splicing regulator 1 (mbnl1), transcript variant X11, mRNA	1	201	201	exon-
NC_031979.2	24300625	24300883	gi|1434966321|ref|XM_005459308.4|	PREDICTED: Oreochromis niloticus immunoglobulin superfamily member 10 (igsf10), mRNA	1	289	289	exon-
NC_031979.2	23987345	23987768	gi|1434964414|ref|XM_019367582.2|	PREDICTED: Oreochromis niloticus intraflagellar transport 80 (ift80), transcript variant X3, mRNA	1	454	454	exon-exon-intron-exon-
NC_031979.2	23188464	23189463	gi|1434963974|ref|XM_005459369.4|	PREDICTED: Oreochromis niloticus cut like homeobox 1 (cux1), transcript variant X2, mRNA	1	1030	1030	exon-intron-exon-intron-exon-
NC_031979.2	22623675	22623874	gi|1434965610|ref|XM_003450830.5|	PREDICTED: Oreochromis niloticus bone morphogenetic protein 2 (LOC100711855), mRNA	1	230	230	exon-
NC_031979.2	21538326	21542264	gi|1434965116|ref|XM_025898165.1|	PREDICTED: Oreochromis niloticus dedicator of cytokinesis 10 (dock10), transcript variant X7, mRNA	1	3969	3969	exon-intron-exon-intron-exon-intron-exon-intron-exon-intron-exon-intron-exon-intron-exon-intron-exon-intron-exon-
NC_031979.2	20060401	20087906	gi|118495715|dbj|AB270897.1|	Oreochromis niloticus MHC class IA antigen UBA1, UBA2, UAA1 genes, partial cds, UAA3 and UAA2 pseudogenes, UAA4, UAA5 and UAA6 pseudogene fragments	1	27536	27536	exon-intergenic-exon-intron-exon-intron-exon-intron-exon-exon-intron-exon-intron-exon-exon-intron-exon-exon-intron-exon-intron-exon-intron-exon-intron-exon-intron-exon-intron-exon-intron-exon-intron-exon-intron-exon-intron-exon-intron-exon-intron-exon-exon-intron-exon-intron-exon-intron-exon-intron-exon-intron-exon-intron-exon-intron-exon-intron-exon-intron-exon-intron-exon-intron-exon-intron-exo…
NC_031979.2	18294020	18294275	gi|1395226785|gb|CP026245.1|	NOT ASSIGNED	1	286	286	intron-
NC_031979.2	18110572	18110902	gi|1434964694|ref|XR_003213768.1|	PREDICTED: Oreochromis niloticus sarcolipin (sln), transcript variant X2, misc_RNA	1	361	361	exon-
NC_031979.2	15964322	15973211	gi|1434965515|ref|XM_005474600.4|	PREDICTED: Oreochromis niloticus Fli-1 proto-oncogene, ETS transcription factor (fli1), transcript variant X6, mRNA	1	8920	8920	exon-intron-exon-exon-intron-exon-intron-exon-
NC_031979.2	15964322	15966507	gi|1434965513|ref|XM_005474597.4|	PREDICTED: Oreochromis niloticus Fli-1 proto-oncogene, ETS transcription factor (fli1), transcript variant X4, mRNA	1	2216	2216	exon-intron-exon-exon-intron-exon-
NC_031979.2	13301603	13305188	gi|1381374697|ref|XM_014408648.3|	PREDICTED: Maylandia zebra acetylcholinesterase (LOC101487581), transcript variant X3, mRNA	1	3616	3616	exon-exon-intron-exon-intron-
NC_031979.2	12145213	12146591	gi|1434965898|ref|XM_005454337.4|	PREDICTED: Oreochromis niloticus protein yippee-like 2 (LOC100702550), mRNA	1	1409	1409	exon-intron-exon-intron-exon-
NC_031979.2	11810479	11810951	gi|1331035470|emb|LT972179.1|	NOT ASSIGNED	1	503	503	intron-
NC_031979.2	11810477	11810949	gi|1331035470|emb|LT972179.1|	NOT ASSIGNED	1	503	503	intron-
NC_031978.2	97182	105225	gi|584031099|ref|XM_006809945.1|	PREDICTED: Neolamprologus brichardi LIM domain-binding protein 3-like (LOC102797234), mRNA	1	8069	8069	exon-exon-intron-exon-intron-exon-intron-exon-intron-
NC_031978.2	7765313	7778076	gi|1434963114|ref|XM_013268458.3|	PREDICTED: Oreochromis niloticus E3 ubiquitin-protein ligase pellino homolog 1 (LOC100711439), mRNA	1	12792	12792	exon-intron-intron-exon-intron-exon-intron-exon-exon-
NC_031978.2	6981533	6983829	gi|1434961271|ref|XM_003438241.5|	PREDICTED: Oreochromis niloticus cadherin-5 (LOC100711438), mRNA	1	2325	2325	exon-intron-exon-intron-exon-intron-exon-intron-exon-
NC_031978.2	5187511	5188391	gi|1434962319|ref|XM_003438253.5|	PREDICTED: Oreochromis niloticus endothelial PAS domain protein 1 (epas1), transcript variant X2, mRNA	1	909	909	exon-intron-exon-intron-exon-
NC_031978.2	32513161	32517038	gi|1434942737|ref|XM_003444416.5|	PREDICTED: Oreochromis niloticus sarcosine dehydrogenase (sardh), transcript variant X2, mRNA	1	3908	3908	exon-intron-exon-
NC_031978.2	31138247	31168862	gi|930732484|ref|XM_014332900.1|	PREDICTED: Haplochromis burtoni von Willebrand factor D and EGF domain-containing protein-like (LOC102310096), transcript variant X2, mRNA	1	30646	30646	exon-intron-exon-intron-exon-intron-exon-exon-intron-exon-intron-exon-exon-intron-exon-intron-intron-
NC_031978.2	30759710	30763908	gi|1434961369|ref|XM_005461429.4|	PREDICTED: Oreochromis niloticus piezo type mechanosensitive ion channel component 1 (piezo1), mRNA	1	4229	4229	exon-intron-exon-intron-exon-intron-exon-intron-exon-
NC_031978.2	30702661	30704116	gi|1434961369|ref|XM_005461429.4|	PREDICTED: Oreochromis niloticus piezo type mechanosensitive ion channel component 1 (piezo1), mRNA	1	1486	1486	exon-exon-intron-
NC_031978.2	24459428	24459724	gi|1434962053|ref|XM_025897571.1|	PREDICTED: Oreochromis niloticus protein tyrosine kinase 7 (inactive) (ptk7), transcript variant X3, mRNA	1	327	327	exon-
NC_031978.2	24063273	24066113	gi|1434962073|ref|XM_019366913.2|	PREDICTED: Oreochromis niloticus spectrin beta chain, non-erythrocytic 1 (LOC100697858), transcript variant X5, mRNA	1	2871	2871	exon-intron-exon-
NC_031978.2	23864359	23867766	gi|584026337|ref|XM_006807683.1|	PREDICTED: Neolamprologus brichardi disrupted in schizophrenia 1 protein-like (LOC102797615), mRNA	1	3438	3438	exon-intron-exon-intron-exon-
NC_031978.2	20937830	20938185	gi|1434961343|ref|XM_003441142.5|	PREDICTED: Oreochromis niloticus proteasome activator subunit 4 (psme4), transcript variant X2, mRNA	1	386	386	exon-intron-exon-
NC_031978.2	19601556	19601690	gi|1110892550|ref|XM_003440993.3|	PREDICTED: Oreochromis niloticus kelch like family member 31 (klhl31), mRNA	1	165	165	exon-
NC_031978.2	19601553	19601693	gi|1110892550|ref|XM_003440993.3|	PREDICTED: Oreochromis niloticus kelch like family member 31 (klhl31), mRNA	1	171	171	exon-
NC_031978.2	17986054	17986280	gi|1434962865|ref|XM_003451922.5|	PREDICTED: Oreochromis niloticus secreted frizzled related protein 5 (sfrp5), mRNA	1	257	257	exon-
NC_031978.2	15970673	15971222	gi|1434961162|ref|XM_003451964.5|	PREDICTED: Oreochromis niloticus voltage dependent anion channel 2 (vdac2), mRNA	1	580	580	exon-exon-
NC_031978.2	102602	105225	gi|118495715|dbj|AB270897.1|	Oreochromis niloticus MHC class IA antigen UBA1, UBA2, UAA1 genes, partial cds, UAA3 and UAA2 pseudogenes, UAA4, UAA5 and UAA6 pseudogene fragments	1	2650	2650	exon-intron-exon-
NC_031978.2	10233147	10250619	gi|61097721|emb|AJ889574.1|	Oreochromis mossambicus partial vtg gene for vitellogenin, promoter and exon 1	1	17503	17503	exon-intron-exon-intron-exon-intron-exon-intron-exon-intron-exon-exon-intron-exon-intron-exon-intron-exon-intron-exon-intron-
NC_031977.2	9813835	9883111	gi|1434956867|ref|XM_019365555.2|	PREDICTED: Oreochromis niloticus glutathione hydrolase 5 proenzyme (LOC102081842), transcript variant X6, mRNA	1	69305	69305	exon-exon-intron-exon-intron-exon-intron-exon-intron-exon-intron-exon-intron-exon-intergenic-exon-exon-intron-exon-intron-exon-intergenic-exon-intron-exon-intron-exon-intron-exon-intron-exon-intron-exon-intron-exon-intron-exon-intron-exon-intron-exon-exon-intron-exon-intron-exon-intergenic-exon-intron-exon-intergenic-exon-intron-exon-intron-exon-intron-exon-intron-exon-intergenic-intron-exon-intr…
NC_031977.2	8572124	8574599	gi|1434959564|ref|XM_003445575.5|	PREDICTED: Oreochromis niloticus musashi RNA binding protein 1 (msi1), transcript variant X3, mRNA	1	2504	2504	intron-exon-intron-exon-intron-exon-intron-exon-
NC_031977.2	3891775	3950294	gi|118495715|dbj|AB270897.1|	Oreochromis niloticus MHC class IA antigen UBA1, UBA2, UAA1 genes, partial cds, UAA3 and UAA2 pseudogenes, UAA4, UAA5 and UAA6 pseudogene fragments	1	58548	58548	exon-intron-exon-intron-exon-exon-intron-exon-intron-exon-intron-exon-exon-intron-exon-intron-exon-intron-exon-intron-exon-intron-exon-intron-exon-intron-exon-exon-intron-exon-intron-exon-intron-exon-exon-exon-intron-exon-intron-intron-intron-intron-
NC_031977.2	37920563	37921585	gi|1434958029|ref|XM_013264273.3|	PREDICTED: Oreochromis niloticus far upstream element-binding protein 3 (LOC100704289), transcript variant X3, mRNA	1	1053	1053	exon-intron-exon-intron-exon-
NC_031977.2	37738522	37739187	gi|1434960004|ref|XM_005460110.4|	PREDICTED: Oreochromis niloticus hamartin (LOC100705892), transcript variant X3, mRNA	1	696	696	exon-intron-exon-intron-exon-
NC_031977.2	35910389	35915393	gi|1434960111|ref|XM_003444482.4|	PREDICTED: Oreochromis niloticus fructose-1,6-bisphosphatase isozyme 2 (LOC100703707), mRNA	1	5035	5035	exon-intron-exon-intron-exon-exon-intron-
NC_031977.2	32797485	32803686	gi|1434959627|ref|XM_003444520.5|	PREDICTED: Oreochromis niloticus SH2 domain-containing protein 3C (LOC100691262), transcript variant X2, mRNA	1	6232	6232	exon-intron-exon-intron-exon-intron-exon-exon-intergenic-
NC_031977.2	30892680	30896142	gi|930774176|ref|XM_005952579.2|	PREDICTED: Haplochromis burtoni calcium/calmodulin-dependent protein kinase type II subunit beta-like (LOC102306429), mRNA	1	3493	3493	exon-intron-exon-intron-exon-intron-exon-intron-exon-
NC_031977.2	30864209	30896142	gi|930774176|ref|XM_005952579.2|	PREDICTED: Haplochromis burtoni calcium/calmodulin-dependent protein kinase type II subunit beta-like (LOC102306429), mRNA	1	31964	31964	exon-exon-intron-exon-intron-exon-intron-exon-intron-exon-exon-exon-intron-exon-intron-exon-intron-exon-intron-exon-intron-exon-intron-exon-intron-intron-
NC_031977.2	30864205	30896138	gi|930774176|ref|XM_005952579.2|	PREDICTED: Haplochromis burtoni calcium/calmodulin-dependent protein kinase type II subunit beta-like (LOC102306429), mRNA	1	31964	31964	intron-exon-exon-intron-exon-intron-exon-intron-exon-intron-exon-exon-exon-intron-exon-intron-exon-intron-exon-intron-exon-intron-exon-intron-exon-intron-intron-
NC_031977.2	25941759	25942024	gi|1434959140|ref|XM_019366089.2|	PREDICTED: Oreochromis niloticus voltage-dependent anion-selective channel protein 2 (LOC100698339), transcript variant X4, mRNA	1	296	296	exon-
NC_031977.2	25938508	25939798	gi|1434959140|ref|XM_019366089.2|	PREDICTED: Oreochromis niloticus voltage-dependent anion-selective channel protein 2 (LOC100698339), transcript variant X4, mRNA	1	1321	1321	exon-intron-exon-intron-exon-intron-exon-
NC_031977.2	25938506	25939796	gi|1434959140|ref|XM_019366089.2|	PREDICTED: Oreochromis niloticus voltage-dependent anion-selective channel protein 2 (LOC100698339), transcript variant X4, mRNA	1	1321	1321	intron-exon-intron-exon-intron-exon-intron-exon-
NC_031977.2	24608897	24610025	gi|939311954|ref|XM_004547096.2|	PREDICTED: Maylandia zebra semaphorin 6A (sema6a), transcript variant X3, mRNA	1	1159	1159	exon-intron-exon-
NC_031977.2	23332000	23332361	gi|1434958651|ref|XM_013271867.3|	PREDICTED: Oreochromis niloticus selenoprotein P (selenop), mRNA	1	392	392	exon-
NC_031977.2	23331757	23331925	gi|1434958651|ref|XM_013271867.3|	PREDICTED: Oreochromis niloticus selenoprotein P (selenop), mRNA	1	199	199	exon-
NC_031977.2	23331757	23331888	gi|923838246|ref|XM_013913071.1|	PREDICTED: Pundamilia nyererei selenoprotein P, plasma, 1 (sepp1), transcript variant X2, mRNA	1	162	162	exon-
NC_031977.2	22286251	22293892	gi|1434957902|ref|XM_005452117.4|	PREDICTED: Oreochromis niloticus phosphodiesterase 4D (pde4d), transcript variant X8, mRNA	1	7672	7672	exon-intron-exon-intron-exon-intron-exon-intron-exon-
NC_031977.2	22104491	22115249	gi|1434959031|ref|XM_019365984.2|	PREDICTED: Oreochromis niloticus macrophage-expressed gene 1 protein (LOC100697252), mRNA	1	10789	10789	exon-intergenic-exon-intron-exon-
NC_031977.2	18786982	18787356	gi|1434957013|ref|XM_025911959.1|	PREDICTED: Oreochromis niloticus oxysterol-binding protein 2 (LOC100703285), transcript variant X3, mRNA	1	405	405	exon-
NC_031977.2	17286339	17286718	gi|1434957887|ref|XM_003451759.5|	PREDICTED: Oreochromis niloticus thrombospondin-4-B (LOC100693277), mRNA	1	410	410	exon-intron-exon-
NC_031977.2	17258122	17258270	gi|1434957886|ref|XM_013275396.3|	PREDICTED: Oreochromis niloticus cardiomyopathy-associated protein 5 (LOC100693549), transcript variant X2, mRNA	1	179	179	exon-
NC_031977.2	15722348	15722913	gi|930735982|ref|XM_014333732.1|	PREDICTED: Haplochromis burtoni rho-related BTB domain-containing protein 2-like (LOC102296660), transcript variant X6, mRNA	1	596	596	exon-intron-exon-
NC_031977.2	14560386	14563298	gi|1434957729|ref|XM_005457484.4|	PREDICTED: Oreochromis niloticus arrestin domain containing 3 (arrdc3), transcript variant X2, mRNA	1	2943	2943	exon-intron-exon-intron-exon-intron-exon-intron-exon-intron-exon-intron-exon-exon-
NC_031977.2	13355695	13362207	gi|1434959493|ref|XM_005457429.4|	PREDICTED: Oreochromis niloticus PDZ and LIM domain protein 2 (LOC100702294), transcript variant X5, mRNA	1	6543	6543	exon-intron-exon-intron-exon-intron-exon-intron-exon-
NC_031977.2	12271913	12272385	gi|930735904|ref|XM_005922759.2|	PREDICTED: Haplochromis burtoni zinc finger, AN1-type domain 5 (zfand5), transcript variant X1, mRNA	1	503	503	intergenic-
NC_031977.2	12178761	12178946	gi|1434958941|ref|XM_025897033.1|	PREDICTED: Oreochromis niloticus major facilitator superfamily domain containing 3 (mfsd3), transcript variant X3, mRNA	1	216	216	exon-
NC_031977.2	11787196	11787384	gi|584022518|ref|XM_006805851.1|	PREDICTED: Neolamprologus brichardi TBC1 domain family member 10A-like (LOC102790521), mRNA	1	219	219	exon-intergenic-
NC_031977.2	111168	114997	gi|927636414|gb|KT671588.1|	Variabilichromis moorii voucher Matthew D. McGee:4237 ultra conserved element locus uce-516 genomic sequence	1	3856	3856	exon-intron-exon-intron-exon-exon-intron-
NC_031977.2	10458669	10475950	gi|1434959879|ref|XM_005473081.4|	PREDICTED: Oreochromis niloticus nuclear receptor corepressor 2 (ncor2), transcript variant X3, mRNA	1	17312	17312	exon-intron-exon-intron-exon-exon-intron-exon-intron-
NC_031977.2	10283077	10284718	gi|913402340|ref|NM_001311315.1|	Oreochromis niloticus fibroblast growth factor receptor 1-A-like (LOC100698136), mRNA	1	1672	1672	exon-intron-exon-intron-exon-intron-exon-
NC_031976.2	95036	95722	gi|1434954410|ref|XR_003222178.1|	PREDICTED: Oreochromis niloticus centrosomal protein 162 (cep162), transcript variant X11, misc_RNA	1	711	711	exon-intron-exon-
NC_031976.2	4617931	4618143	gi|1434952765|ref|XM_013266543.3|	PREDICTED: Oreochromis niloticus SNF related kinase (snrk), transcript variant X4, mRNA	1	241	241	exon-
NC_031976.2	4608763	4618143	gi|118495715|dbj|AB270897.1|	Oreochromis niloticus MHC class IA antigen UBA1, UBA2, UAA1 genes, partial cds, UAA3 and UAA2 pseudogenes, UAA4, UAA5 and UAA6 pseudogene fragments	1	9409	9409	exon-intron-exon-
NC_031976.2	4314381	4316945	gi|1434952685|ref|XM_005463992.4|	PREDICTED: Oreochromis niloticus transforming growth factor beta 2 (tgfb2), transcript variant X1, mRNA	1	2593	2593	exon-intron-exon-intron-exon-intron-exon-intron-exon-exon-
NC_031976.2	37837631	37838049	gi|930758967|ref|XM_014339635.1|	PREDICTED: Haplochromis burtoni sodium bicarbonate cotransporter 3-like (LOC102290558), mRNA	1	449	449	exon-intron-exon-
NC_031976.2	36846463	36851307	gi|1468864578|ref|XM_026185832.1|	PREDICTED: Astatotilapia calliptera membrane-spanning 4-domains subfamily A member 4A-like (LOC113032754), transcript variant X3, mRNA	1	4875	4875	exon-intron-exon-intron-exon-exon-exon-exon-intron-exon-intergenic-exon-intron-intron-
NC_031976.2	36846457	36851301	gi|1468864578|ref|XM_026185832.1|	PREDICTED: Astatotilapia calliptera membrane-spanning 4-domains subfamily A member 4A-like (LOC113032754), transcript variant X3, mRNA	1	4875	4875	exon-intron-exon-intron-exon-exon-exon-exon-intron-exon-intergenic-exon-intron-
NC_031976.2	36016595	36018688	gi|1434954002|ref|XM_013275037.3|	PREDICTED: Oreochromis niloticus lamin A/C (lmna), transcript variant X2, mRNA	1	2124	2124	exon-intron-exon-
NC_031976.2	349407	351650	gi|1434953734|ref|XM_005459408.4|	PREDICTED: Oreochromis niloticus activating signal cointegrator 1 complex subunit 3 (ascc3), transcript variant X7, mRNA	1	2270	2270	exon-intron-exon-
NC_031976.2	30134711	30144109	gi|1434953284|ref|XM_003456416.5|	PREDICTED: Oreochromis niloticus myocyte enhancer factor 2D (mef2d), transcript variant X9, mRNA	1	9429	9429	exon-intron-exon-
NC_031976.2	28772006	28780804	gi|1434953028|ref|XM_003451112.5|	PREDICTED: Oreochromis niloticus persulfide dioxygenase ETHE1, mitochondrial (LOC100698874), transcript variant X1, mRNA	1	8829	8829	exon-intron-exon-intron-exon-intron-exon-intron-exon-intron-exon-intron-exon-intron-exon-intron-exon-intron-exon-intron-exon-intron-exon-intron-exon-exon-intergenic-exon-
NC_031976.2	283826	284149	gi|1434953733|ref|XM_005459407.4|	PREDICTED: Oreochromis niloticus activating signal cointegrator 1 complex subunit 3 (ascc3), transcript variant X6, mRNA	1	350	350	exon-intron-exon-
NC_031976.2	27995918	27996070	gi|542234515|ref|XR_266608.1|	NOT ASSIGNED	1	183	183	exon-
NC_031976.2	27050457	27050591	gi|1434954491|ref|XM_013274576.3|	PREDICTED: Oreochromis niloticus G protein nucleolar 2 (gnl2), mRNA	1	165	165	exon-
NC_031976.2	25058302	25070403	gi|1434954473|ref|XM_025911502.1|	PREDICTED: Oreochromis niloticus C-X-C chemokine receptor type 3 (LOC109204161), transcript variant X3, mRNA	1	12132	12132	exon-intron-exon-intron-exon-intron-exon-intergenic-exon-intron-exon-intron-exon-intron-exon-intron-exon-intergenic-exon-exon-intron-exon-exon-intron-exon-intron-
NC_031976.2	25058302	25065962	gi|1434954473|ref|XM_025911502.1|	PREDICTED: Oreochromis niloticus C-X-C chemokine receptor type 3 (LOC109204161), transcript variant X3, mRNA	1	7691	7691	exon-intron-exon-intron-exon-intron-exon-intergenic-exon-intron-exon-intron-exon-intron-exon-intron-exon-intergenic-exon-exon-
NC_031976.2	23764111	23765478	gi|1434954287|ref|XM_005455498.4|	PREDICTED: Oreochromis niloticus discoidin domain receptor tyrosine kinase 1 (ddr1), transcript variant X5, mRNA	1	1398	1398	exon-intron-exon-
NC_031976.2	22980651	22982460	gi|1434955850|ref|XM_005455415.4|	PREDICTED: Oreochromis niloticus chloride voltage-gated channel 1 (clcn1), mRNA	1	1840	1840	exon-intron-exon-intron-exon-
NC_031976.2	22324576	22324720	gi|1434956322|ref|XM_003450609.5|	PREDICTED: Oreochromis niloticus ubiquitin conjugating enzyme E2 S (ube2s), mRNA	1	175	175	exon-
NC_031976.2	22227024	22231590	gi|1434906574|ref|XM_005468006.4|	PREDICTED: Oreochromis niloticus protein Wnt-8a (LOC100704879), transcript variant X2, mRNA	1	4597	4597	exon-intron-exon-
NC_031976.2	20746886	20747448	gi|1434955400|ref|XM_003450965.4|	PREDICTED: Oreochromis niloticus tuftelin 1 (tuft1), mRNA	1	593	593	exon-exon-intron-exon-exon-intron-exon-exon-
NC_031976.2	20002179	20003557	gi|1434954376|ref|XM_003450933.4|	PREDICTED: Oreochromis niloticus pyruvate dehyrogenase phosphatase catalytic subunit 1 (pdp1), transcript variant X2, mRNA	1	1409	1409	exon-intron-exon-intron-exon-
NC_031976.2	18765005	18765397	gi|1434955109|ref|XM_013276996.3|	PREDICTED: Oreochromis niloticus kinesin family member 13A (kif13a), transcript variant X6, mRNA	1	423	423	exon-intron-exon-
NC_031976.2	1773467	1774455	gi|1434955294|ref|XM_013268385.3|	PREDICTED: Oreochromis niloticus phosphatidylinositide phosphatase SAC1-A (LOC100707989), transcript variant X4, mRNA	1	1017	1017	exon-intron-exon-exon-intron-exon-
NC_031976.2	17480771	17481259	gi|1434954848|ref|XM_019364835.2|	PREDICTED: Oreochromis niloticus heat shock cognate 71 kDa protein (LOC100707311), mRNA	1	519	519	exon-intron-exon-
NC_031976.2	13601181	13601436	gi|1434953210|ref|XM_025911261.1|	PREDICTED: Oreochromis niloticus plectin (LOC100704602), transcript variant X27, mRNA	1	286	286	exon-
NC_031976.2	13596457	13596603	gi|1434953210|ref|XM_025911261.1|	PREDICTED: Oreochromis niloticus plectin (LOC100704602), transcript variant X27, mRNA	1	177	177	exon-
NC_031976.2	13596223	13596561	gi|1434953210|ref|XM_025911261.1|	PREDICTED: Oreochromis niloticus plectin (LOC100704602), transcript variant X27, mRNA	1	369	369	exon-
NC_031976.2	10373687	10376021	gi|1434954124|ref|XM_005450575.3|	PREDICTED: Oreochromis niloticus growth factor receptor-bound protein 10 (LOC100703704), transcript variant X5, mRNA	1	2365	2365	exon-intron-exon-exon-
NC_031975.2	996205	996411	gi|1434950648|ref|XM_003458052.5|	PREDICTED: Oreochromis niloticus DEAH-box helicase 33 (dhx33), mRNA	1	233	233	exon-
NC_031975.2	6849935	6869489	gi|1434951386|ref|XM_025910889.1|	PREDICTED: Oreochromis niloticus peripheral-type benzodiazepine receptor-associated protein 1-like (LOC112841777), transcript variant X9, mRNA	1	19583	19583	exon-intron-exon-exon-intron-
NC_031975.2	6608331	6611100	gi|1434952665|ref|XM_003456125.5|	PREDICTED: Oreochromis niloticus myotubularin related protein 4 (mtmr4), transcript variant X2, mRNA	1	2798	2798	exon-intron-exon-intron-exon-intron-exon-intron-exon-
NC_031975.2	5836855	5845643	gi|118495715|dbj|AB270897.1|	Oreochromis niloticus MHC class IA antigen UBA1, UBA2, UAA1 genes, partial cds, UAA3 and UAA2 pseudogenes, UAA4, UAA5 and UAA6 pseudogene fragments	1	8817	8817	exon-intron-exon-intron-exon-intron-exon-intron-exon-intron-exon-intron-exon-
NC_031975.2	531120	549980	gi|157429631|gb|EF526075.2|	Astatotilapia burtoni BAC 99M12 Gsh2 (gsh2), Pdgfra (pdgfra), and Kita (kita) genes, complete cds; Kdrb (kdrb) gene, partial cds; and Clock (clock) gene, complete cds	1	18887	18887	exon-intron-exon-intron-exon-exon-intron-
NC_031975.2	3586348	3586913	gi|1110883229|ref|XM_003449801.3|	PREDICTED: Oreochromis niloticus creatine kinase M-type (LOC100701380), mRNA	1	594	594	exon-intron-exon-intron-exon-
NC_031975.2	31995505	32001195	gi|1434950413|ref|XM_003459528.5|	PREDICTED: Oreochromis niloticus histone H2B 1/2 (LOC100694569), mRNA	1	5721	5721	intergenic-intergenic-exon-exon-
NC_031975.2	30861143	30861328	gi|930742334|ref|XM_005927883.2|	PREDICTED: Haplochromis burtoni sarcoglycan, delta (35kDa dystrophin-associated glycoprotein) (sgcd), transcript variant X4, mRNA	1	216	216	exon-
NC_031975.2	2380920	2391610	gi|583987916|ref|XM_006789122.1|	PREDICTED: Neolamprologus brichardi UV radiation resistance-associated gene protein-like (LOC102777255), mRNA	1	10719	10719	exon-intron-exon-
NC_031975.2	19390394	19392880	gi|923794682|ref|XM_005727934.2|	PREDICTED: Pundamilia nyererei cytoplasmic polyadenylation element binding protein 4 (cpeb4), mRNA	1	2517	2517	exon-intron-exon-intron-exon-intron-exon-intron-exon-
NC_031975.2	18882514	18882682	gi|1434951777|ref|XM_005452631.4|	PREDICTED: Oreochromis niloticus beta-2 adrenergic receptor (LOC100711747), mRNA	1	199	199	exon-
NC_031975.2	15663222	15663473	gi|1434950929|ref|XM_003446872.5|	PREDICTED: Oreochromis niloticus periostin (LOC100695303), transcript variant X3, mRNA	1	282	282	exon-
NC_031975.2	11139723	11158453	gi|1434952238|ref|XM_019364003.2|	PREDICTED: Oreochromis niloticus E3 ubiquitin-protein ligase RNF167 (LOC100707667), transcript variant X3, mRNA	1	18761	18761	exon-intron-exon-intron-exon-exon-intron-exon-intergenic-exon-exon-intron-exon-intron-exon-intron-exon-intron-intron-
NC_031975.2	10572081	10572768	gi|1434952261|ref|XM_019363847.2|	PREDICTED: Oreochromis niloticus mitochondrial uncoupling protein 2 (LOC100702672), transcript variant X2, mRNA	1	718	718	exon-intron-exon-exon-intron-exon-
NC_031975.2	10571737	10572101	gi|1434952261|ref|XM_019363847.2|	PREDICTED: Oreochromis niloticus mitochondrial uncoupling protein 2 (LOC100702672), transcript variant X2, mRNA	1	395	395	exon-intron-exon-
NC_031974.2	5238696	5265148	gi|1059791593|gb|AH013711.2|	Oreochromis niloticus KLR3 (KLR3) gene, exons 2 through 7; KLR2 pseudogene, partial sequence; KLR1 gene, complete sequence; KLR4 (KLR4) gene, exons 2 through 7; KLR5 (KLR5) gene, exons 1 through 7; KLR6 and KLR7 pseudogenes, complete sequence; KLR9 (KLR10) pseudogene, exons 4 through 7; KLR8 pseudogene, partial sequence; KLR9 (KLR9) gene, exons 1 through 7; C-type lectin (CLECT2)-like protein gen…	1	26481	26481	exon-intron-exon-exon-intron-exon-intergenic-
NC_031974.2	5186003	5265148	gi|1059791593|gb|AH013711.2|	Oreochromis niloticus KLR3 (KLR3) gene, exons 2 through 7; KLR2 pseudogene, partial sequence; KLR1 gene, complete sequence; KLR4 (KLR4) gene, exons 2 through 7; KLR5 (KLR5) gene, exons 1 through 7; KLR6 and KLR7 pseudogenes, complete sequence; KLR9 (KLR10) pseudogene, exons 4 through 7; KLR8 pseudogene, partial sequence; KLR9 (KLR9) gene, exons 1 through 7; C-type lectin (CLECT2)-like protein gen…	1	79174	79174	exon-intron-exon-exon-exon-intron-exon-intron-exon-exon-exon-exon-exon-intron-exon-intron-exon-intron-exon-intron-exon-intron-exon-exon-exon-intron-exon-intron-exon-exon-exon-intron-exon-intron-exon-exon-intron-exon-intergenic-intergenic-intron-intergenic-
NC_031974.2	5165149	5265148	gi|1059791593|gb|AH013711.2|	Oreochromis niloticus KLR3 (KLR3) gene, exons 2 through 7; KLR2 pseudogene, partial sequence; KLR1 gene, complete sequence; KLR4 (KLR4) gene, exons 2 through 7; KLR5 (KLR5) gene, exons 1 through 7; KLR6 and KLR7 pseudogenes, complete sequence; KLR9 (KLR10) pseudogene, exons 4 through 7; KLR8 pseudogene, partial sequence; KLR9 (KLR9) gene, exons 1 through 7; C-type lectin (CLECT2)-like protein gen…	1	100028	100028	exon-exon-intron-exon-exon-intron-exon-intron-exon-exon-exon-intron-exon-intron-exon-exon-exon-exon-exon-intron-exon-intron-exon-intron-exon-intron-exon-intron-exon-exon-exon-intron-exon-intron-exon-exon-exon-intron-exon-intron-exon-exon-intron-exon-intergenic-intergenic-intergenic-intron-intergenic-
NC_031974.2	3677058	3677501	gi|1434947568|ref|XM_013265285.3|	PREDICTED: Oreochromis niloticus enoyl-CoA delta isomerase 2 (eci2), transcript variant X3, mRNA	1	472	472	exon-intron-exon-intron-exon-
NC_031974.2	3674865	3677161	gi|1434947568|ref|XM_013265285.3|	PREDICTED: Oreochromis niloticus enoyl-CoA delta isomerase 2 (eci2), transcript variant X3, mRNA	1	2325	2325	exon-intron-exon-intron-exon-intron-exon-intron-exon-intron-exon-
NC_031974.2	3672689	3676049	gi|1434947568|ref|XM_013265285.3|	PREDICTED: Oreochromis niloticus enoyl-CoA delta isomerase 2 (eci2), transcript variant X3, mRNA	1	3389	3389	exon-intron-exon-intron-exon-intron-exon-intron-exon-intron-exon-intron-exon-
NC_031974.2	33775136	33776976	gi|1434947902|ref|XM_005456481.4|	PREDICTED: Oreochromis niloticus sorting nexin 7 (snx7), mRNA	1	1871	1871	exon-intron-exon-intron-exon-
NC_031974.2	33279235	33289846	gi|1434948660|ref|XM_025910436.1|	PREDICTED: Oreochromis niloticus microtubule-associated protein 4 (LOC100711676), transcript variant X11, mRNA	1	10642	10642	exon-intron-exon-intron-exon-intron-exon-intron-
NC_031974.2	33279231	33289842	gi|1434948660|ref|XM_025910436.1|	PREDICTED: Oreochromis niloticus microtubule-associated protein 4 (LOC100711676), transcript variant X11, mRNA	1	10642	10642	exon-intron-exon-intron-exon-intron-exon-
NC_031974.2	33263545	33282836	gi|1434948664|ref|XM_025910438.1|	PREDICTED: Oreochromis niloticus microtubule-associated protein 4 (LOC100711676), transcript variant X13, mRNA	1	19322	19322	exon-exon-intron-exon-intron-exon-intron-exon-intron-
NC_031974.2	29771390	29774852	gi|1434948134|ref|XM_005471630.4|	PREDICTED: Oreochromis niloticus zinc finger protein 438 (znf438), transcript variant X3, mRNA	1	3493	3493	exon-exon-intron-exon-
NC_031974.2	29672185	29679769	gi|1434947421|ref|XM_019362957.2|	PREDICTED: Oreochromis niloticus supervillin (svil), transcript variant X16, mRNA	1	7615	7615	exon-intron-exon-intron-exon-intron-exon-intron-exon-
NC_031974.2	29670437	29679769	gi|1434947416|ref|XM_005471638.4|	PREDICTED: Oreochromis niloticus supervillin (svil), transcript variant X6, mRNA	1	9363	9363	exon-exon-intron-exon-intron-exon-intron-exon-intron-exon-intron-exon-intron-
NC_031974.2	28863725	28865202	gi|1434947119|ref|XM_003450218.5|	PREDICTED: Oreochromis niloticus integrin subunit beta 1 (itgb1), transcript variant X3, mRNA	1	1508	1508	exon-intron-exon-intron-exon-intron-exon-intron-exon-
NC_031974.2	2830519	2852685	gi|118495715|dbj|AB270897.1|	Oreochromis niloticus MHC class IA antigen UBA1, UBA2, UAA1 genes, partial cds, UAA3 and UAA2 pseudogenes, UAA4, UAA5 and UAA6 pseudogene fragments	1	22195	22195	exon-intron-exon-exon-intron-exon-intron-exon-intron-exon-exon-intron-intron-
NC_031974.2	27005253	27006569	gi|1434947583|ref|XM_019354840.2|	PREDICTED: Oreochromis niloticus mucin-5AC (LOC102082342), transcript variant X4, mRNA	1	1347	1347	exon-
NC_031974.2	23340061	23351009	gi|930760747|ref|XM_014340112.1|	PREDICTED: Haplochromis burtoni pleckstrin homology-like domain family B member 2 (LOC102301890), transcript variant X6, mRNA	1	10979	10979	exon-intron-exon-intron-exon-intergenic-intergenic-
NC_031974.2	23340061	23345678	gi|930760747|ref|XM_014340112.1|	PREDICTED: Haplochromis burtoni pleckstrin homology-like domain family B member 2 (LOC102301890), transcript variant X6, mRNA	1	5648	5648	intergenic-
NC_031974.2	23340028	23350976	gi|930760747|ref|XM_014340112.1|	PREDICTED: Haplochromis burtoni pleckstrin homology-like domain family B member 2 (LOC102301890), transcript variant X6, mRNA	1	10979	10979	exon-intron-exon-intron-exon-intergenic-intergenic-
NC_031974.2	23340028	23345645	gi|930760747|ref|XM_014340112.1|	PREDICTED: Haplochromis burtoni pleckstrin homology-like domain family B member 2 (LOC102301890), transcript variant X6, mRNA	1	5648	5648	intergenic-
NC_031974.2	2251334	2254201	gi|118495715|dbj|AB270897.1|	Oreochromis niloticus MHC class IA antigen UBA1, UBA2, UAA1 genes, partial cds, UAA3 and UAA2 pseudogenes, UAA4, UAA5 and UAA6 pseudogene fragments	1	2896	2896	exon-intron-exon-intron-exon-intron-exon-intron-exon-intron-exon-
NC_031974.2	21238481	21240279	gi|1434948386|ref|XM_003443483.3|	PREDICTED: Oreochromis niloticus membrane associated ring-CH-type finger 6 (march6), mRNA	1	1829	1829	exon-intron-exon-intron-exon-intron-exon-
NC_031974.2	19985849	19986183	gi|1434948715|ref|XM_019363242.2|	PREDICTED: Oreochromis niloticus EYA transcriptional coactivator and phosphatase 1 (eya1), transcript variant X6, mRNA	1	365	365	exon-exon-
NC_031974.2	18953996	18962182	gi|1434946792|ref|XM_025910068.1|	PREDICTED: Oreochromis niloticus receptor-type tyrosine-protein kinase FLT3 (LOC102078401), transcript variant X6, mRNA	1	8217	8217	exon-intron-exon-intron-exon-intron-exon-intron-exon-exon-intron-exon-exon-intron-exon-intron-exon-exon-intron-exon-exon-intron-intron-
NC_031974.2	18953274	19001240	gi|1434946779|ref|XM_005471898.3|	PREDICTED: Oreochromis niloticus trichohyalin-like (LOC102082957), mRNA	1	47997	47997	exon-intron-exon-intron-exon-intron-exon-intron-exon-intron-exon-intron-exon-intron-exon-exon-intron-exon-exon-intron-exon-intron-exon-exon-intron-exon-exon-intron-exon-intron-exon-intron-exon-intron-exon-intron-exon-intron-exon-exon-exon-exon-exon-exon-exon-exon-intron-exon-intron-exon-exon-exon-intron-exon-intron-exon-intron-exon-intron-exon-exon-intron-exon-intron-exon-exon-intron-exon-intron-…
NC_031974.2	17225161	17225582	gi|1434949242|ref|XM_005448905.2|	PREDICTED: Oreochromis niloticus U2 snRNP associated SURP domain containing (u2surp), transcript variant X3, mRNA	1	452	452	exon-intron-exon-
NC_031974.2	17172163	17174628	gi|584000168|ref|XM_006795079.1|	PREDICTED: Neolamprologus brichardi sickle tail protein homolog (LOC102783605), transcript variant X6, mRNA	1	2496	2496	exon-exon-intron-exon-exon-intron-exon-
NC_031974.2	17041291	17043827	gi|1434948410|ref|XM_005448919.4|	PREDICTED: Oreochromis niloticus DLG associated protein 1 (dlgap1), transcript variant X4, mRNA	1	2567	2567	exon-intron-exon-intron-exon-
NC_031974.2	17036611	17037165	gi|1434948410|ref|XM_005448919.4|	PREDICTED: Oreochromis niloticus DLG associated protein 1 (dlgap1), transcript variant X4, mRNA	1	585	585	exon-intron-exon-
NC_031973.2	9903733	9905025	gi|1434943742|ref|XM_019362446.2|	PREDICTED: Oreochromis niloticus eukaryotic elongation factor 2 kinase (eef2k), transcript variant X8, mRNA	1	1321	1321	exon-intron-exon-intron-exon-intron-exon-
NC_031973.2	9724280	9724710	gi|1434943733|ref|XM_003441735.5|	PREDICTED: Oreochromis niloticus tripartite motif containing 8 (trim8), mRNA	1	459	459	exon-
NC_031973.2	7573564	7573697	gi|930724652|ref|XM_005913568.2|	PREDICTED: Haplochromis burtoni collagen alpha-1(I) chain-like (LOC102304089), transcript variant X2, mRNA	1	162	162	exon-
NC_031973.2	6541346	6542303	gi|1434944303|ref|XM_019362294.2|	PREDICTED: Oreochromis niloticus ankyrin-3 (LOC100703272), transcript variant X13, mRNA	1	986	986	exon-intron-exon-exon-
NC_031973.2	4820953	4828959	gi|927599563|gb|KT634745.1|	Neolamprologus pulcher voucher Matthew D. McGee:4405 ultra conserved element locus uce-375 genomic sequence	1	8035	8035	exon-exon-intron-exon-intron-exon-intron-exon-intron-exon-
NC_031973.2	4664930	4672518	gi|1434945945|ref|XM_025909900.1|	PREDICTED: Oreochromis niloticus microtubule-associated protein tau (LOC100696807), transcript variant X27, mRNA	1	7617	7617	exon-intron-exon-intron-exon-intron-exon-exon-intron-exon-intron-
NC_031973.2	3593092	3593378	gi|1434945303|ref|XM_003448623.5|	PREDICTED: Oreochromis niloticus NPL4 homolog, ubiquitin recognition factor (nploc4), mRNA	1	315	315	exon-intron-exon-
NC_031973.2	29573237	29573753	gi|1434946574|ref|XM_013276815.3|	PREDICTED: Oreochromis niloticus RNA binding protein fox-1 homolog 3 (LOC100698083), transcript variant X12, mRNA	1	547	547	exon-intron-
NC_031973.2	29426332	29433584	gi|118495715|dbj|AB270897.1|	Oreochromis niloticus MHC class IA antigen UBA1, UBA2, UAA1 genes, partial cds, UAA3 and UAA2 pseudogenes, UAA4, UAA5 and UAA6 pseudogene fragments	1	7283	7283	exon-intron-exon-intron-exon-intron-exon-intron-exon-intron-exon-intron-exon-intron-exon-
NC_031973.2	2786240	2789907	gi|1434945250|ref|XM_025909750.1|	PREDICTED: Oreochromis niloticus synapse defective Rho GTPase homolog 1 (syde1), transcript variant X2, mRNA	1	3696	3696	exon-intron-exon-intron-exon-intron-exon-intron-exon-intron-exon-intron-exon-intron-exon-
NC_031973.2	26163121	26166477	gi|1434944198|ref|XM_005447927.4|	PREDICTED: Oreochromis niloticus dual specificity mitogen-activated protein kinase kinase 4 (LOC100711257), transcript variant X4, mRNA	1	3387	3387	exon-
NC_031973.2	26159330	26159830	gi|930737102|ref|XM_005923763.2|	PREDICTED: Haplochromis burtoni dual specificity mitogen-activated protein kinase kinase 4-like (LOC102293557), transcript variant X6, mRNA	1	531	531	exon-intron-exon-intron-exon-
NC_031973.2	25289302	25292744	gi|1434944139|ref|XM_019362085.2|	PREDICTED: Oreochromis niloticus C-Jun-amino-terminal kinase-interacting protein 4 (LOC100690161), transcript variant X3, mRNA	1	3473	3473	exon-intron-exon-intron-exon-intron-exon-
NC_031973.2	23874355	23875251	gi|930759894|ref|XM_014339880.1|	PREDICTED: Haplochromis burtoni ubiquitin carboxyl-terminal hydrolase 22 (LOC102314523), transcript variant X3, mRNA	1	927	927	exon-intron-exon-
NC_031973.2	21757047	21795462	gi|1434944858|ref|XM_019362262.2|	PREDICTED: Oreochromis niloticus regulator of G protein signaling 9 (rgs9), transcript variant X1, mRNA	1	38446	38446	exon-exon-exon-intron-exon-intron-exon-intron-intron-
NC_031973.2	20644650	20645537	gi|1434944615|ref|XM_013274026.3|	PREDICTED: Oreochromis niloticus parvalbumin beta (LOC100707505), mRNA	1	918	918	exon-intron-exon-intron-exon-
NC_031973.2	20644370	20645522	gi|1434944615|ref|XM_013274026.3|	PREDICTED: Oreochromis niloticus parvalbumin beta (LOC100707505), mRNA	1	1183	1183	exon-intron-exon-intron-exon-
NC_031973.2	20644367	20645519	gi|1434944615|ref|XM_013274026.3|	PREDICTED: Oreochromis niloticus parvalbumin beta (LOC100707505), mRNA	1	1183	1183	exon-intron-exon-intron-exon-
NC_031973.2	20520221	20520630	gi|584012227|ref|XM_006800957.1|	PREDICTED: Neolamprologus brichardi cytochrome b-c1 complex subunit 2, mitochondrial-like (LOC102789526), transcript variant X2, mRNA	1	440	440	exon-intron-exon-
NC_031973.2	19539782	19544652	gi|1110957666|ref|XM_019362739.1|	PREDICTED: Oreochromis niloticus low affinity immunoglobulin gamma Fc region receptor II-a (LOC102080655), mRNA	1	4901	4901	exon-exon-intron-exon-exon-intergenic-exon-intron-exon-intron-exon-intron-exon-
NC_031973.2	1854460	1854640	gi|1434945996|ref|XM_025909909.1|	NOT ASSIGNED	1	209	209	exon-exon-
NC_031973.2	16918808	16919520	gi|1434944070|ref|XM_003438483.4|	PREDICTED: Oreochromis niloticus fructose-bisphosphate aldolase A (ald), mRNA	1	743	743	exon-intron-exon-
NC_031973.2	16918804	16919148	gi|1434944070|ref|XM_003438483.4|	PREDICTED: Oreochromis niloticus fructose-bisphosphate aldolase A (ald), mRNA	1	375	375	exon-
NC_031973.2	16793864	16795450	gi|1434945696|ref|XM_025909836.1|	PREDICTED: Oreochromis niloticus sodium channel protein type 4 subunit alpha B (LOC100704400), transcript variant X6, mRNA	1	1617	1617	exon-intron-exon-intron-exon-intron-exon-intron-intron-
NC_031973.2	16592971	16595187	gi|1434945134|ref|XM_019362622.2|	PREDICTED: Oreochromis niloticus MYC associated zinc finger protein (maz), transcript variant X1, mRNA	1	2247	2247	exon-exon-intron-exon-intron-exon-exon-
NC_031973.2	16446813	16447271	gi|1110957238|ref|XM_013266483.2|	PREDICTED: Oreochromis niloticus sarcoplasmic/endoplasmic reticulum calcium ATPase 1 (LOC100706607), transcript variant X2, mRNA	1	489	489	exon-
NC_031973.2	16446689	16447072	gi|1110957238|ref|XM_013266483.2|	PREDICTED: Oreochromis niloticus sarcoplasmic/endoplasmic reticulum calcium ATPase 1 (LOC100706607), transcript variant X2, mRNA	1	414	414	exon-
NC_031973.2	16442896	16443445	gi|923863343|ref|XM_013914954.1|	PREDICTED: Pundamilia nyererei sarcoplasmic/endoplasmic reticulum calcium ATPase 1 (LOC102214567), transcript variant X2, mRNA	1	580	580	exon-intron-exon-
NC_031973.2	16442893	16443442	gi|923863343|ref|XM_013914954.1|	PREDICTED: Pundamilia nyererei sarcoplasmic/endoplasmic reticulum calcium ATPase 1 (LOC102214567), transcript variant X2, mRNA	1	580	580	exon-intron-exon-
NC_031973.2	16441310	16443440	gi|1110957238|ref|XM_013266483.2|	PREDICTED: Oreochromis niloticus sarcoplasmic/endoplasmic reticulum calcium ATPase 1 (LOC100706607), transcript variant X2, mRNA	1	2161	2161	exon-intron-exon-intron-exon-intron-exon-intron-exon-intron-exon-
NC_031973.2	16441134	16442428	gi|1110957238|ref|XM_013266483.2|	PREDICTED: Oreochromis niloticus sarcoplasmic/endoplasmic reticulum calcium ATPase 1 (LOC100706607), transcript variant X2, mRNA	1	1325	1325	exon-intron-exon-intron-exon-intron-exon-
NC_031973.2	16440679	16447177	gi|1110957238|ref|XM_013266483.2|	PREDICTED: Oreochromis niloticus sarcoplasmic/endoplasmic reticulum calcium ATPase 1 (LOC100706607), transcript variant X2, mRNA	1	6529	6529	exon-intron-exon-intron-exon-intron-exon-intron-exon-intron-exon-intron-exon-intron-exon-intron-exon-intron-exon-intron-exon-intron-exon-intron-exon-intron-exon-intron-exon-intron-exon-
NC_031973.2	16438042	16439063	gi|1110957238|ref|XM_013266483.2|	PREDICTED: Oreochromis niloticus sarcoplasmic/endoplasmic reticulum calcium ATPase 1 (LOC100706607), transcript variant X2, mRNA	1	1052	1052	exon-intron-exon-
NC_031973.2	16438034	16439063	gi|1110957238|ref|XM_013266483.2|	PREDICTED: Oreochromis niloticus sarcoplasmic/endoplasmic reticulum calcium ATPase 1 (LOC100706607), transcript variant X2, mRNA	1	1060	1060	exon-intron-exon-
NC_031973.2	16435281	16435442	gi|1110957238|ref|XM_013266483.2|	PREDICTED: Oreochromis niloticus sarcoplasmic/endoplasmic reticulum calcium ATPase 1 (LOC100706607), transcript variant X2, mRNA	1	192	192	exon-
NC_031973.2	15631590	15632166	gi|1434946038|ref|XM_005471245.4|	PREDICTED: Oreochromis niloticus zinc finger protein 281 (LOC100690362), transcript variant X4, mRNA	1	607	607	exon-
NC_031973.2	13461966	13465680	gi|55057188|emb|CR846318.1|	Takifugu rubripes DNA, highly conserved vertebrate non-coding sequence, element ID CNE214	1	3745	3745	exon-intron-exon-intron-exon-
NC_031973.2	12902722	12910554	gi|1434946220|ref|XM_003441815.5|	PREDICTED: Oreochromis niloticus zinc finger protein 503 (LOC100700352), mRNA	1	7863	7863	exon-intron-exon-intergenic-intergenic-
NC_031973.2	11135532	11153291	gi|1434944126|ref|XM_019362509.2|	PREDICTED: Oreochromis niloticus dedicator of cytokinesis 1 (dock1), transcript variant X2, mRNA	1	17790	17790	exon-exon-intron-exon-intron-exon-intron-exon-intron-exon-intron-exon-intron-
NC_031973.2	10931167	10933059	gi|1434943805|ref|XM_019362507.2|	PREDICTED: Oreochromis niloticus protein tyrosine phosphatase, receptor type E (ptpre), transcript variant X7, mRNA	1	1923	1923	exon-intron-exon-intron-exon-exon-intron-exon-
NC_031973.2	10308924	10315155	gi|1434945504|ref|XM_013269531.2|	PREDICTED: Oreochromis niloticus LIM domain-binding protein 3 (LOC100707522), transcript variant X2, mRNA	1	6262	6262	exon-intron-exon-intron-exon-intron-exon-intron-exon-
NC_031973.2	10107427	10107672	gi|1434943703|ref|XM_013269537.3|	PREDICTED: Oreochromis niloticus SEC24 homolog C, COPII coat complex component (sec24c), transcript variant X4, mRNA	1	276	276	exon-
NC_031972.2	9053108	9053349	gi|1434942082|ref|XM_005449455.4|	PREDICTED: Oreochromis niloticus myocyte-specific enhancer factor 2C (LOC100706088), transcript variant X5, mRNA	1	270	270	exon-
NC_031972.2	9033630	9035959	gi|1434942082|ref|XM_005449455.4|	PREDICTED: Oreochromis niloticus myocyte-specific enhancer factor 2C (LOC100706088), transcript variant X5, mRNA	1	2358	2358	exon-intron-exon-
NC_031972.2	64604445	64605952	gi|584001667|ref|XM_006795805.1|	PREDICTED: Neolamprologus brichardi UPF0183 protein C16orf70 homolog (LOC102792389), transcript variant X2, mRNA	1	1538	1538	exon-intron-exon-intron-exon-intron-exon-intron-exon-intron-exon-exon-
NC_031972.2	61867819	61878007	gi|1434940381|ref|XM_019361921.2|	PREDICTED: Oreochromis niloticus FYVE, RhoGEF and PH domain-containing protein 4 (LOC100693441), transcript variant X8, mRNA	1	10219	10219	exon-intron-exon-intron-exon-intron-exon-intron-exon-
NC_031972.2	61245143	61245486	gi|1434936877|ref|XM_025908740.1|	PREDICTED: Oreochromis niloticus protein-methionine sulfoxide oxidase mical3a (LOC100695036), transcript variant X30, mRNA	1	374	374	exon-exon-
NC_031972.2	61139037	61140216	gi|1434936886|ref|XM_003447065.5|	PREDICTED: Oreochromis niloticus homeodomain-interacting protein kinase 2 (LOC100701827), mRNA	1	1210	1210	exon-
NC_031972.2	59916280	59917564	gi|1434943550|ref|XM_025909482.1|	PREDICTED: Oreochromis niloticus titin (LOC106097813), mRNA	1	1315	1315	intron-exon-intron-exon-exon-
NC_031972.2	58530805	58530949	gi|1434941352|ref|XM_003440499.5|	PREDICTED: Oreochromis niloticus peptidase domain containing associated with muscle regeneration 1 (pamr1), mRNA	1	175	175	exon-
NC_031972.2	55921304	55921575	gi|1434942214|ref|XM_013268638.3|	PREDICTED: Oreochromis niloticus carnitine O-palmitoyltransferase 1, liver isoform (LOC100698825), transcript variant X4, mRNA	1	302	302	exon-
NC_031972.2	55920981	55921575	gi|1434942214|ref|XM_013268638.3|	PREDICTED: Oreochromis niloticus carnitine O-palmitoyltransferase 1, liver isoform (LOC100698825), transcript variant X4, mRNA	1	625	625	exon-
NC_031972.2	55355000	55355198	gi|1434938256|ref|XM_005470846.4|	PREDICTED: Oreochromis niloticus RNA binding motif protein 28 (rbm28), mRNA	1	229	229	intron-exon-
NC_031972.2	52841210	52863052	gi|1434938106|ref|XM_025908905.1|	PREDICTED: Oreochromis niloticus S-phase cyclin A associated protein in the ER (scaper), transcript variant X3, mRNA	1	21873	21873	exon-intron-exon-intron-exon-intron-exon-intron-exon-intron-exon-intron-exon-intron-exon-intron-exon-intron-exon-intron-exon-intron-exon-intron-exon-exon-intron-exon-intron-exon-intron-exon-intron-exon-intron-exon-intron-exon-intron-exon-intron-
NC_031972.2	52750455	52754068	gi|1434942885|ref|XM_019361620.2|	PREDICTED: Oreochromis niloticus tropomyosin 1 (tpm1), transcript variant X7, mRNA	1	3644	3644	exon-intron-exon-intron-exon-intron-exon-intron-exon-intron-exon-intron-exon-exon-exon-
NC_031972.2	52225351	52226002	gi|1434935885|ref|XM_003440433.5|	PREDICTED: Oreochromis niloticus Krueppel-like factor 13 (LOC100690800), mRNA	1	682	682	exon-
NC_031972.2	49696925	49699506	gi|542222757|ref|XM_003443869.2|	PREDICTED: Oreochromis niloticus pyruvate kinase PKM (LOC100534543), mRNA	1	2612	2612	exon-intron-exon-intron-exon-intron-exon-intron-exon-intron-exon-intron-exon-
NC_031972.2	49696925	49699088	gi|542222757|ref|XM_003443869.2|	PREDICTED: Oreochromis niloticus pyruvate kinase PKM (LOC100534543), mRNA	1	2194	2194	exon-intron-exon-intron-exon-intron-exon-intron-exon-
NC_031972.2	48411677	48413963	gi|930743823|ref|XM_014335746.1|	PREDICTED: Haplochromis burtoni CUGBP Elav-like family member 2 (LOC102310863), mRNA	1	2317	2317	exon-intron-exon-intron-exon-
NC_031972.2	48409310	48413963	gi|930743823|ref|XM_014335746.1|	PREDICTED: Haplochromis burtoni CUGBP Elav-like family member 2 (LOC102310863), mRNA	1	4684	4684	exon-intron-exon-intron-exon-intron-exon-intron-exon-
NC_031972.2	46436059	46440800	gi|1434936030|ref|XM_019361775.2|	PREDICTED: Oreochromis niloticus peroxisome proliferator-activated receptor alpha (LOC100709869), transcript variant X4, mRNA	1	4772	4772	exon-intron-exon-
NC_031972.2	45699594	45727467	gi|1434939919|ref|XM_019361796.2|	PREDICTED: Oreochromis niloticus mannose-binding protein C (LOC109194373), mRNA	1	27904	27904	exon-intron-exon-intron-exon-intron-exon-intergenic-exon-intron-exon-intron-exon-intron-exon-intron-exon-intergenic-exon-exon-intergenic-
NC_031972.2	45273117	45325820	gi|1434935127|ref|XM_003447521.5|	PREDICTED: Oreochromis niloticus catalase (LOC100712286), mRNA	1	52734	52734	exon-intron-exon-intron-exon-intron-exon-intron-exon-intron-exon-intron-exon-intron-exon-intron-exon-exon-exon-exon-intron-exon-intron-exon-intron-exon-intergenic-intron-intergenic-
NC_031972.2	45271772	45322487	gi|1434935127|ref|XM_003447521.5|	PREDICTED: Oreochromis niloticus catalase (LOC100712286), mRNA	1	50746	50746	exon-intron-exon-intron-exon-intron-exon-intron-exon-intron-exon-intron-exon-intron-exon-intron-exon-intron-exon-intron-exon-exon-exon-exon-intron-exon-intergenic-intron-intergenic-
NC_031972.2	43736378	43740327	gi|1434938972|ref|XM_019361688.2|	PREDICTED: Oreochromis niloticus inositol hexakisphosphate and diphosphoinositol-pentakisphosphate kinase 1 (LOC100701407), transcript variant X7, mRNA	1	3980	3980	exon-intron-exon-intron-exon-intron-exon-intron-exon-intron-exon-intron-exon-intron-exon-intron-exon-
NC_031972.2	43601595	43601741	gi|1434939006|ref|XM_003455401.4|	PREDICTED: Oreochromis niloticus apoptosis-enhancing nuclease (LOC100699779), mRNA	1	177	177	exon-
NC_031972.2	42756205	42778451	gi|930752083|ref|XM_005935572.2|	PREDICTED: Haplochromis burtoni transcription intermediary factor 1-alpha-like (LOC102298140), transcript variant X3, mRNA	1	22277	22277	exon-exon-intron-exon-intron-exon-exon-intron-exon-intron-exon-intron-exon-intron-exon-exon-intergenic-exon-intron-
NC_031972.2	41189270	41189586	gi|1434940305|ref|XM_025909126.1|	PREDICTED: Oreochromis niloticus suppression of tumorigenicity 7 (st7), transcript variant X7, mRNA	1	347	347	exon-exon-intron-
NC_031972.2	40797375	40798506	gi|1434939098|ref|XM_003449214.5|	PREDICTED: Oreochromis niloticus ceramide kinase (LOC100699400), transcript variant X2, mRNA	1	1162	1162	exon-intron-exon-intron-exon-intron-
NC_031972.2	39903955	39908497	gi|1434936930|ref|XM_025908753.1|	PREDICTED: Oreochromis niloticus A-kinase anchor protein 13 (LOC100704265), transcript variant X9, mRNA	1	4573	4573	exon-intron-exon-intron-exon-
NC_031972.2	3593439	3593575	gi|1434936051|ref|XM_005449247.4|	PREDICTED: Oreochromis niloticus troponin T, fast skeletal muscle isoforms (LOC100707421), transcript variant X11, mRNA	1	165	165	exon-
NC_031972.2	3584468	3590213	gi|15076659|dbj|AB067589.1|	Melanochromis joanjohnsonae DNA, SINE sequence, locus:1613	1	5774	5774	exon-intron-exon-intron-exon-intron-exon-intron-exon-exon-intron-exon-intron-exon-intron-exon-intron-exon-intron-
NC_031972.2	3583995	3586696	gi|15076659|dbj|AB067589.1|	Melanochromis joanjohnsonae DNA, SINE sequence, locus:1613	1	2730	2730	exon-intron-exon-intron-exon-
NC_031972.2	3583995	3584608	gi|1434936045|ref|XM_005449241.3|	PREDICTED: Oreochromis niloticus troponin T, fast skeletal muscle isoforms (LOC100707421), transcript variant X5, mRNA	1	642	642	exon-intron-exon-
NC_031972.2	3583989	3584602	gi|1434936045|ref|XM_005449241.3|	PREDICTED: Oreochromis niloticus troponin T, fast skeletal muscle isoforms (LOC100707421), transcript variant X5, mRNA	1	642	642	intron-exon-intron-exon-
NC_031972.2	3500318	3500473	gi|1434940081|ref|XM_025909097.1|	PREDICTED: Oreochromis niloticus troponin I, fast skeletal muscle (LOC100706619), transcript variant X2, mRNA	1	184	184	exon-
NC_031972.2	3499043	3500428	gi|1434940081|ref|XM_025909097.1|	PREDICTED: Oreochromis niloticus troponin I, fast skeletal muscle (LOC100706619), transcript variant X2, mRNA	1	1414	1414	exon-intron-exon-intron-exon-
NC_031972.2	34989853	34993388	gi|1434941163|ref|XM_003440107.5|	PREDICTED: Oreochromis niloticus histone-lysine N-methyltransferase SMYD1 (LOC100691245), mRNA	1	3566	3566	exon-intron-exon-intron-exon-intron-exon-intron-exon-intron-exon-intron-exon-
NC_031972.2	3497910	3499132	gi|1434940081|ref|XM_025909097.1|	PREDICTED: Oreochromis niloticus troponin I, fast skeletal muscle (LOC100706619), transcript variant X2, mRNA	1	1251	1251	exon-exon-intron-exon-intron-exon-
NC_031972.2	3488786	3500485	gi|1434940073|ref|XR_003220926.1|	PREDICTED: Oreochromis niloticus troponin I, fast skeletal muscle (LOC100706087), transcript variant X2, misc_RNA	1	11728	11728	exon-intergenic-exon-intron-exon-intron-exon-intron-exon-intron-exon-intron-exon-intron-exon-exon-exon-exon-exon-intron-exon-exon-intron-exon-intron-exon-intron-exon-intron-exon-exon-exon-
NC_031972.2	32935904	32936219	gi|583973488|ref|XM_006782086.1|	NOT ASSIGNED	1	346	346	exon-intron-exon-
NC_031972.2	32106218	32106497	gi|1434901520|ref|XM_005463526.4|	PREDICTED: Oreochromis niloticus pleckstrin homology domain containing O2 (plekho2), mRNA	1	310	310	exon-
NC_031972.2	2737716	2737880	gi|1434937295|ref|XM_003439381.5|	PREDICTED: Oreochromis niloticus peptide deformylase, mitochondrial (pdf), mRNA	1	193	193	exon-
NC_031972.2	26752938	26753662	gi|1434939392|ref|XM_005451411.4|	PREDICTED: Oreochromis niloticus sorting nexin family member 30 (snx30), transcript variant X2, mRNA	1	755	755	exon-intron-exon-
NC_031972.2	25108327	25120358	gi|1434942754|ref|XM_005451367.4|	PREDICTED: Oreochromis niloticus ER degradation-enhancing alpha-mannosidase-like protein 3 (LOC100706542), transcript variant X1, mRNA	1	12062	12062	exon-intron-exon-intron-exon-intron-exon-intron-exon-intron-exon-intron-exon-intron-exon-intron-exon-intron-exon-intron-exon-intron-exon-intron-exon-intron-exon-intron-exon-intron-exon-intron-exon-intron-exon-exon-exon-intron-exon-intron-exon-intergenic-exon-intron-
NC_031972.2	2092228	2093976	gi|1434935708|ref|XM_019360965.2|	PREDICTED: Oreochromis niloticus fibroblast growth factor receptor substrate 2 (frs2), mRNA	1	1777	1777	exon-intron-exon-intron-exon-
NC_031972.2	20473070	20473290	gi|583987593|ref|XM_006788963.1|	PREDICTED: Neolamprologus brichardi UPF0184 protein C9orf16 homolog (LOC102786748), mRNA	1	251	251	exon-intron-
NC_031972.2	1900940	1901222	gi|1434935716|ref|XM_025908585.1|	PREDICTED: Oreochromis niloticus protein LSM14 homolog A (LOC100693305), mRNA	1	311	311	exon-
NC_031972.2	16393609	16398923	gi|1434941958|ref|XM_025909222.1|	PREDICTED: Oreochromis niloticus CDK5 regulatory subunit associated protein 2 (cdk5rap2), transcript variant X6, mRNA	1	5345	5345	exon-intron-exon-intron-exon-intron-exon-intron-exon-intron-exon-intron-exon-intron-exon-intron-exon-intron-exon-exon-intron-exon-intron-exon-intron-exon-
NC_031972.2	16393096	16395347	gi|1434941958|ref|XM_025909222.1|	PREDICTED: Oreochromis niloticus CDK5 regulatory subunit associated protein 2 (cdk5rap2), transcript variant X6, mRNA	1	2282	2282	exon-exon-intron-exon-intron-exon-intron-exon-intron-exon-intron-exon-intron-exon-intron-exon-
NC_031972.2	1474071	1490744	gi|923882741|ref|XM_013908102.1|	PREDICTED: Pundamilia nyererei dynein heavy chain 6, axonemal-like (LOC102215540), partial mRNA	1	16702	16702	intergenic-exon-exon-exon-exon-
NC_031972.2	14526194	14528871	gi|930729148|ref|XM_005917207.2|	PREDICTED: Haplochromis burtoni formin binding protein 1 (fnbp1), transcript variant X19, mRNA	1	2708	2708	exon-intron-exon-intron-exon-intron-exon-intron-exon-
NC_031972.2	14171217	14172066	gi|1434941079|ref|XM_013274073.3|	PREDICTED: Oreochromis niloticus basic transcription factor 3 (btf3), transcript variant X1, mRNA	1	880	880	exon-intron-exon-intron-exon-
NC_031972.2	14008991	14017846	gi|1434936801|ref|XM_005454502.4|	PREDICTED: Oreochromis niloticus transportin 1 (tnpo1), transcript variant X4, mRNA	1	8886	8886	exon-intron-exon-intron-exon-intron-exon-intron-exon-
NC_031972.2	13997888	13998018	gi|1434936802|ref|XM_003449653.5|	PREDICTED: Oreochromis niloticus MOB kinase activator 1B (LOC100706667), mRNA	1	161	161	exon-
NC_031972.2	12583615	12585940	gi|1434934728|ref|XM_019360672.2|	PREDICTED: Oreochromis niloticus adaptor related protein complex 3 subunit beta 1 (ap3b1), transcript variant X2, mRNA	1	2356	2356	exon-intron-exon-intron-exon-
NC_031972.2	10808675	10811044	gi|1110949483|ref|XM_003452968.4|	PREDICTED: Oreochromis niloticus creatine kinase S-type, mitochondrial (LOC100709269), mRNA	1	2400	2400	exon-intron-exon-intron-exon-intron-exon-intron-exon-
NC_031972.2	10411641	10412030	gi|1434940876|ref|XM_005449513.4|	PREDICTED: Oreochromis niloticus hydroxymethylglutaryl-CoA synthase, cytoplasmic (LOC100712075), transcript variant X2, mRNA	1	420	420	exon-
NC_031971.2	9252955	9253751	gi|1434930482|ref|XM_003459356.5|	PREDICTED: Oreochromis niloticus activating transcription factor 4 (atf4), transcript variant X2, mRNA	1	825	825	exon-exon-
NC_031971.2	6119526	6119804	gi|1434933225|ref|XM_003454134.5|	PREDICTED: Oreochromis niloticus aspartate aminotransferase, cytoplasmic (LOC100691210), mRNA	1	307	307	exon-
NC_031971.2	5760083	5760236	gi|930757602|ref|XM_005939974.2|	PREDICTED: Haplochromis burtoni hexokinase-1-like (LOC102301388), mRNA	1	182	182	intron-exon-intron-exon-
NC_031971.2	5727367	5731113	gi|548494229|ref|XM_005749611.1|	PREDICTED: Pundamilia nyererei myomesin 2 (myom2), mRNA	1	3775	3775	intron-exon-intron-exon-intron-exon-intron-exon-intron-
NC_031971.2	5715744	5715908	gi|1434931870|ref|XM_025908185.1|	PREDICTED: Oreochromis niloticus myomesin-2 (LOC100703741), transcript variant X6, mRNA	1	193	193	exon-
NC_031971.2	4834407	4841830	gi|28849242|dbj|AB104861.1|	Oreochromis niloticus GnRH1 gene for seabream-type gonadotropin-releasing hormone precursor, complete cds	1	7452	7452	exon-intron-exon-intron-exon-intron-exon-intron-exon-intron-exon-intron-exon-intron-exon-intron-exon-intron-exon-intron-exon-
NC_031971.2	4316374	4316630	gi|1434931634|ref|XM_003456545.5|	PREDICTED: Oreochromis niloticus interferon regulatory factor 2-binding protein 2-B (LOC100702762), mRNA	1	285	285	exon-
NC_031971.2	4316365	4316621	gi|1434931634|ref|XM_003456545.5|	PREDICTED: Oreochromis niloticus interferon regulatory factor 2-binding protein 2-B (LOC100702762), mRNA	1	285	285	exon-
NC_031971.2	42021773	42028544	gi|118495715|dbj|AB270897.1|	Oreochromis niloticus MHC class IA antigen UBA1, UBA2, UAA1 genes, partial cds, UAA3 and UAA2 pseudogenes, UAA4, UAA5 and UAA6 pseudogene fragments	1	6802	6802	exon-intron-exon-exon-intron-exon-intron-
NC_031971.2	4075465	4076159	gi|1434931636|ref|XM_005461334.4|	PREDICTED: Oreochromis niloticus endoplasmic reticulum oxidoreductase 1 beta (ero1b), transcript variant X2, mRNA	1	723	723	exon-intron-exon-
NC_031971.2	38270554	38300608	gi|118495715|dbj|AB270897.1|	Oreochromis niloticus MHC class IA antigen UBA1, UBA2, UAA1 genes, partial cds, UAA3 and UAA2 pseudogenes, UAA4, UAA5 and UAA6 pseudogene fragments	1	30085	30085	exon-intron-exon-exon-intron-exon-exon-exon-intron-exon-exon-intron-exon-intron-exon-intron-exon-intron-exon-intron-exon-intron-intron-exon-intron-exon-intron-exon-intron-exon-intron-exon-intron-exon-intron-exon-intron-exon-intron-exon-intron-exon-intron-exon-intron-exon-intron-exon-intron-exon-intron-exon-exon-intron-
NC_031971.2	38121738	38169161	gi|1434977697|ref|XM_025899837.1|	PREDICTED: Oreochromis niloticus paraneoplastic antigen Ma3-like (LOC112842685), mRNA	1	47454	47454	exon-intron-exon-intron-exon-intron-exon-intron-exon-intron-exon-intron-exon-intron-exon-exon-intron-exon-intron-exon-intron-exon-intron-exon-intron-exon-intron-exon-intron-exon-intron-exon-intron-exon-intron-exon-intron-exon-intron-exon-intron-exon-intron-exon-intron-exon-intron-exon-intron-exon-intron-exon-exon-exon-exon-exon-intron-exon-intron-exon-intron-exon-intron-intron-intergenic-
NC_031971.2	38010281	38010442	gi|1434930751|ref|XM_003448004.5|	PREDICTED: Oreochromis niloticus prolyl 4-hydroxylase subunit beta (p4hb), mRNA	1	192	192	exon-
NC_031971.2	37620824	37621013	gi|1434930717|ref|XM_003447982.5|	PREDICTED: Oreochromis niloticus SEC14-like protein 1 (LOC100703895), transcript variant X2, mRNA	1	220	220	exon-
NC_031971.2	37168314	37171695	gi|1434930659|ref|XM_025908046.1|	PREDICTED: Oreochromis niloticus mastermind like transcriptional coactivator 3 (maml3), mRNA	1	3412	3412	exon-intron-exon-intergenic-
NC_031971.2	34388402	34399716	gi|930731281|ref|XM_005919031.2|	PREDICTED: Haplochromis burtoni cell division cycle 14B (cdc14b), transcript variant X10, mRNA	1	11345	11345	exon-exon-intron-exon-intron-exon-intron-
NC_031971.2	32780640	32785145	gi|1434929799|ref|XM_003453769.5|	PREDICTED: Oreochromis niloticus synaptogyrin-2 (LOC100706152), mRNA	1	4536	4536	exon-exon-intron-
NC_031971.2	31223507	31223722	gi|1434929489|ref|XM_019360024.2|	PREDICTED: Oreochromis niloticus polycystin 1, transient receptor potential channel interacting (pkd1), transcript variant X2, mRNA	1	246	246	exon-
NC_031971.2	30637727	30642104	gi|1434929897|ref|XM_005454805.4|	PREDICTED: Oreochromis niloticus adenylate cyclase type 9 (LOC100710254), transcript variant X2, mRNA	1	4408	4408	exon-exon-intron-exon-intron-exon-intron-exon-intron-exon-intron-
NC_031971.2	30305630	30307437	gi|1434929402|ref|XM_025907908.1|	PREDICTED: Oreochromis niloticus gamma-adducin (LOC100699311), transcript variant X9, mRNA	1	1838	1838	exon-intron-exon-intron-exon-
NC_031971.2	28487322	28487454	gi|1434928748|ref|XM_003458319.5|	PREDICTED: Oreochromis niloticus calcium voltage-gated channel auxiliary subunit gamma 1 (cacng1), mRNA	1	163	163	exon-
NC_031971.2	27059186	27061091	gi|583984586|ref|XM_006787490.1|	PREDICTED: Neolamprologus brichardi ubinuclein-2-like (LOC102799674), mRNA	1	1936	1936	exon-intron-exon-intron-exon-
NC_031971.2	25669337	25673838	gi|1434932087|ref|XM_013272986.3|	PREDICTED: Oreochromis niloticus septin-9 (LOC100703172), transcript variant X8, mRNA	1	4532	4532	exon-intron-exon-intron-exon-intron-exon-
NC_031971.2	25666303	25666706	gi|930753135|ref|XM_014338133.1|	PREDICTED: Haplochromis burtoni septin-9-like (LOC102291050), transcript variant X7, mRNA	1	434	434	exon-intron-exon-
NC_031971.2	25304261	25305356	gi|1381436082|ref|XR_001342150.3|	NOT ASSIGNED	1	1126	1126	exon-intron-exon-
NC_031971.2	25304257	25305352	gi|1381436082|ref|XR_001342150.3|	NOT ASSIGNED	1	1126	1126	exon-intron-exon-
NC_031971.2	21629351	21637835	gi|1434928231|ref|XM_005456903.4|	PREDICTED: Oreochromis niloticus amyloid beta precursor protein binding family B member 2 (apbb2), transcript variant X9, mRNA	1	8515	8515	exon-intron-exon-intron-exon-intron-exon-intron-exon-intron-exon-intron-exon-
NC_031971.2	19384637	19384769	gi|1434932272|ref|XM_005458708.3|	NOT ASSIGNED	1	163	163	exon-
NC_031971.2	16688352	16689055	gi|1434927495|ref|XR_003220345.1|	PREDICTED: Oreochromis niloticus GRB2 associated binding protein 1 (gab1), transcript variant X6, ncRNA	1	734	734	exon-intron-exon-
NC_031971.2	14134755	14145218	gi|1434933317|ref|XM_025908384.1|	PREDICTED: Oreochromis niloticus sorbin and SH3 domain containing 2 (sorbs2), transcript variant X20, mRNA	1	10494	10494	exon-exon-intron-
NC_031971.2	13664805	13679263	gi|1434930503|ref|XM_013264567.3|	PREDICTED: Oreochromis niloticus voltage-dependent T-type calcium channel subunit alpha-1H (LOC100704019), transcript variant X2, mRNA	1	14489	14489	exon-intron-exon-intron-exon-intron-exon-intron-exon-intron-exon-intron-exon-exon-exon-intron-exon-intron-exon-intron-exon-intron-exon-
NC_031971.2	13664805	13670498	gi|1434930503|ref|XM_013264567.3|	PREDICTED: Oreochromis niloticus voltage-dependent T-type calcium channel subunit alpha-1H (LOC100704019), transcript variant X2, mRNA	1	5724	5724	exon-intron-exon-intron-exon-intron-exon-intron-exon-intron-exon-intron-exon-exon-exon-
NC_031971.2	13618843	13619254	gi|584002365|ref|XM_006796140.1|	PREDICTED: Neolamprologus brichardi E3 ubiquitin-protein ligase RBBP6-like (LOC102788826), mRNA	1	442	442	exon-intron-exon-intron-
NC_031971.2	12968594	12981746	gi|1434933134|ref|XM_019360124.2|	PREDICTED: Oreochromis niloticus cytochrome P450 3A30 (LOC100700506), transcript variant X2, mRNA	1	13183	13183	exon-intron-exon-intron-exon-intron-exon-intron-exon-intron-exon-intron-exon-intron-exon-intron-exon-intron-exon-intron-exon-intron-exon-intron-exon-intron-exon-intron-exon-intron-exon-intron-exon-intron-exon-intron-exon-intron-exon-exon-intron-exon-intron-exon-intron-exon-intron-exon-intron-exon-intron-exon-intron-
NC_031971.2	12958994	12981746	gi|1434933134|ref|XM_019360124.2|	PREDICTED: Oreochromis niloticus cytochrome P450 3A30 (LOC100700506), transcript variant X2, mRNA	1	22783	22783	exon-intron-exon-intron-exon-exon-intron-exon-intron-exon-intron-exon-intron-exon-intron-exon-intron-exon-intron-exon-intron-exon-intron-exon-intron-exon-intron-exon-intron-exon-intron-exon-intron-exon-intron-exon-intron-exon-intron-exon-intron-exon-intron-exon-intron-exon-intron-exon-intron-exon-intron-exon-intron-exon-intron-exon-intron-exon-intron-exon-intron-exon-intron-exon-intron-exon-intro…
NC_031971.2	10943024	10955563	gi|1434927546|ref|XM_025907682.1|	PREDICTED: Oreochromis niloticus MICAL-like protein 2 (LOC102076226), transcript variant X3, mRNA	1	12570	12570	exon-exon-intron-exon-intron-exon-intron-exon-intron-exon-intron-exon-intron-exon-intron-exon-exon-intron-exon-intron-exon-intron-exon-intron-exon-intron-exon-intron-exon-intron-exon-intron-
NC_031970.2	9435049	9435360	gi|1434921472|ref|XM_003453661.5|	PREDICTED: Oreochromis niloticus myosin-binding protein H (LOC100699230), mRNA	1	340	340	exon-intron-exon-
NC_031970.2	8255082	8256847	gi|1434921338|ref|XM_013264635.3|	PREDICTED: Oreochromis niloticus proto-oncogene tyrosine-protein kinase Src (LOC100690332), transcript variant X3, mRNA	1	1794	1794	exon-intron-exon-exon-
NC_031970.2	6746571	6750567	gi|1434921264|ref|XM_013276942.3|	PREDICTED: Oreochromis niloticus ras-related protein Rap-1A (LOC100692376), transcript variant X6, mRNA	1	4025	4025	exon-exon-intron-exon-intron-exon-exon-intron-
NC_031970.2	32666106	32668191	gi|1434926028|ref|XM_005450143.4|	PREDICTED: Oreochromis niloticus PDZ domain containing ring finger 3 (pdzrn3), transcript variant X2, mRNA	1	2116	2116	exon-intron-exon-
NC_031970.2	32666102	32668187	gi|1434926028|ref|XM_005450143.4|	PREDICTED: Oreochromis niloticus PDZ domain containing ring finger 3 (pdzrn3), transcript variant X2, mRNA	1	2116	2116	exon-intron-exon-intron-
NC_031970.2	32228398	32232530	gi|1434926014|ref|XM_019358619.2|	PREDICTED: Oreochromis niloticus forkhead box P1 (foxp1), transcript variant X21, mRNA	1	4163	4163	exon-exon-intron-exon-exon-intron-exon-
NC_031970.2	30068400	30090161	gi|118495715|dbj|AB270897.1|	Oreochromis niloticus MHC class IA antigen UBA1, UBA2, UAA1 genes, partial cds, UAA3 and UAA2 pseudogenes, UAA4, UAA5 and UAA6 pseudogene fragments	1	21792	21792	intron-exon-intron-exon-intron-exon-intron-exon-intron-exon-exon-intron-intron-
NC_031970.2	25032729	25032974	gi|1434924416|ref|XM_019358801.2|	PREDICTED: Oreochromis niloticus proline and arginine rich end leucine rich repeat protein (prelp), transcript variant X3, mRNA	1	276	276	exon-
NC_031970.2	24263108	24264783	gi|930738431|ref|XM_005924844.2|	PREDICTED: Haplochromis burtoni gastrula zinc finger protein XlCGF57.1-like (LOC102304359), transcript variant X21, mRNA	1	1706	1706	exon-intron-exon-intron-exon-intron-exon-
NC_031970.2	24242071	24242259	gi|1110942907|ref|XM_005469457.3|	PREDICTED: Oreochromis niloticus calcium-binding and coiled-coil domain-containing protein 1 (LOC100708241), mRNA	1	219	219	exon-
NC_031970.2	24060100	24060969	gi|1434924223|ref|XM_005469469.4|	PREDICTED: Oreochromis niloticus low-density lipoprotein receptor-related protein 1 (LOC100706902), transcript variant X2, mRNA	1	900	900	exon-intron-exon-intron-exon-
NC_031970.2	23603992	23604201	gi|1434926026|ref|XM_003441476.5|	PREDICTED: Oreochromis niloticus ATP-dependent 6-phosphofructokinase, muscle type (pfk), mRNA	1	240	240	exon-
NC_031970.2	16921125	16921390	gi|1434922516|ref|XM_003448334.5|	PREDICTED: Oreochromis niloticus BRICK1, SCAR/WAVE actin nucleating complex subunit (brk1), mRNA	1	296	296	exon-
NC_031970.2	15532102	15541381	gi|1434924413|ref|XM_019359173.2|	PREDICTED: Oreochromis niloticus E3 ubiquitin-protein ligase TRIM39-like (LOC106096446), mRNA	1	9310	9310	intergenic-exon-exon-intron-exon-exon-
NC_031970.2	14665387	14665540	gi|1434922307|ref|XM_005453616.4|	PREDICTED: Oreochromis niloticus protein TMEPAI (LOC100691730), transcript variant X3, mRNA	1	184	184	exon-
NC_031970.2	1317991	1318125	gi|1434921062|ref|XM_005462561.4|	PREDICTED: Oreochromis niloticus makorin ring finger protein 2 (mkrn2), mRNA	1	163	163	exon-
NC_031970.2	11779339	11797327	gi|1434926543|ref|XM_019359110.2|	PREDICTED: Oreochromis niloticus protein hairy (LOC109202242), mRNA	1	18019	18019	exon-exon-intron-exon-intergenic-exon-intron-exon-intergenic-intergenic-exon-
NC_031970.2	11779339	11787347	gi|1434926545|ref|XM_019359109.2|	PREDICTED: Oreochromis niloticus transcription factor HES-5 (LOC109202241), mRNA	1	8039	8039	exon-exon-intergenic-
NC_031969.2	9670378	9743595	gi|1434918754|ref|XM_019357445.2|	PREDICTED: Oreochromis niloticus interferon-induced very large GTPase 1-like (LOC102080551), mRNA	1	73246	73246	exon-intron-exon-intron-exon-intron-exon-exon-intron-exon-intron-exon-intron-exon-exon-intron-exon-exon-intron-exon-intron-exon-intron-exon-intron-exon-intergenic-exon-intron-exon-intron-exon-intron-exon-intron-exon-intron-intergenic-exon-intergenic-exon-intergenic-
NC_031969.2	9156348	9157313	gi|1434919439|ref|XM_025906771.1|	PREDICTED: Oreochromis niloticus RNA binding protein fox-1 homolog 2 (LOC100692969), transcript variant X8, mRNA	1	994	994	exon-intron-exon-intron-exon-
NC_031969.2	4593021	4598712	gi|525343822|ref|NM_001279444.1|	Oreochromis niloticus collagen type I alpha 1 chain (col1a1), mRNA	1	5720	5720	exon-intron-exon-intron-exon-intron-exon-intron-exon-intron-exon-intron-exon-intron-exon-intron-exon-intron-exon-intron-exon-intron-exon-intron-exon-intron-exon-
NC_031969.2	4582704	4583220	gi|1434915731|ref|XM_019357401.2|	PREDICTED: Oreochromis niloticus collagen type I alpha 1 chain (col1a1), transcript variant X2, mRNA	1	545	545	exon-exon-
NC_031969.2	363188	363570	gi|1434918863|ref|XM_003457936.5|	PREDICTED: Oreochromis niloticus transmembrane protein 106B (LOC100702945), transcript variant X3, mRNA	1	409	409	exon-intron-exon-
NC_031969.2	35445680	35449395	gi|1434918148|ref|XR_001224128.3|	PREDICTED: Oreochromis niloticus sodium channel protein type 4 subunit alpha B (LOC100703327), transcript variant X8, misc_RNA	1	3746	3746	exon-intron-exon-intron-exon-intron-exon-intron-exon-intron-exon-intron-exon-intron-exon-intron-
NC_031969.2	34246086	34247624	gi|118495715|dbj|AB270897.1|	Oreochromis niloticus MHC class IA antigen UBA1, UBA2, UAA1 genes, partial cds, UAA3 and UAA2 pseudogenes, UAA4, UAA5 and UAA6 pseudogene fragments	1	1569	1569	exon-exon-intron-exon-intron-exon-
NC_031969.2	34214392	34231727	gi|118495715|dbj|AB270897.1|	Oreochromis niloticus MHC class IA antigen UBA1, UBA2, UAA1 genes, partial cds, UAA3 and UAA2 pseudogenes, UAA4, UAA5 and UAA6 pseudogene fragments	1	17366	17366	exon-intron-exon-intron-exon-exon-intergenic-
NC_031969.2	33625114	33625524	gi|1434917911|ref|XM_025906485.1|	PREDICTED: Oreochromis niloticus ataxin 2 like (atxn2l), mRNA	1	441	441	exon-intron-exon-
NC_031969.2	33551811	33553223	gi|1434917917|ref|XM_025906486.1|	PREDICTED: Oreochromis niloticus serine/threonine-protein kinase NLK2 (LOC100700355), transcript variant X3, mRNA	1	1443	1443	exon-intron-exon-intron-exon-
NC_031969.2	32522801	32523671	gi|1434917763|ref|XM_003442477.5|	PREDICTED: Oreochromis niloticus tetratricopeptide repeat protein 30A (LOC100700268), transcript variant X2, mRNA	1	901	901	exon-intron-exon-
NC_031969.2	30161427	30193815	gi|118495715|dbj|AB270897.1|	Oreochromis niloticus MHC class IA antigen UBA1, UBA2, UAA1 genes, partial cds, UAA3 and UAA2 pseudogenes, UAA4, UAA5 and UAA6 pseudogene fragments	1	32419	32419	intron-exon-intron-exon-intron-exon-exon-intergenic-exon-intron-exon-intron-exon-intron-exon-intron-exon-intron-exon-intron-exon-exon-intron-
NC_031969.2	29112596	29112770	gi|1434918706|ref|XM_003442405.5|	PREDICTED: Oreochromis niloticus myosin light chain, phosphorylatable, fast skeletal muscle (mylpf), mRNA	1	205	205	exon-
NC_031969.2	29112566	29112732	gi|1434918706|ref|XM_003442405.5|	PREDICTED: Oreochromis niloticus myosin light chain, phosphorylatable, fast skeletal muscle (mylpf), mRNA	1	197	197	exon-
NC_031969.2	29112380	29112595	gi|1434918706|ref|XM_003442405.5|	PREDICTED: Oreochromis niloticus myosin light chain, phosphorylatable, fast skeletal muscle (mylpf), mRNA	1	246	246	exon-
NC_031969.2	29112357	29112498	gi|1434918706|ref|XM_003442405.5|	PREDICTED: Oreochromis niloticus myosin light chain, phosphorylatable, fast skeletal muscle (mylpf), mRNA	1	172	172	exon-
NC_031969.2	29112212	29112465	gi|1434918706|ref|XM_003442405.5|	PREDICTED: Oreochromis niloticus myosin light chain, phosphorylatable, fast skeletal muscle (mylpf), mRNA	1	284	284	exon-
NC_031969.2	27644710	27647169	gi|1434917430|ref|XM_005468897.4|	PREDICTED: Oreochromis niloticus rho GTPase-activating protein 23 (LOC100695909), mRNA	1	2490	2490	intron-exon-intron-exon-intron-exon-intron-exon-intron-
NC_031969.2	27580275	27580843	gi|1434917422|ref|XM_019357694.2|	PREDICTED: Oreochromis niloticus LIM and SH3 protein 1 (lasp1), transcript variant X2, mRNA	1	599	599	exon-exon-
NC_031969.2	26415862	26416071	gi|1434917286|ref|XM_003442160.5|	PREDICTED: Oreochromis niloticus caveolae-associated protein 1 (LOC100703963), mRNA	1	240	240	exon-
NC_031969.2	23492294	23516023	gi|1110938500|ref|XM_019357842.1|	PREDICTED: Oreochromis niloticus myosin heavy chain, fast skeletal muscle (LOC100706261), mRNA	1	23760	23760	exon-intron-exon-intron-exon-intron-exon-intron-exon-intron-exon-intron-exon-intron-exon-exon-intron-exon-intron-exon-intron-exon-intron-exon-intron-exon-intron-exon-intron-exon-intron-exon-intron-exon-intron-exon-intron-exon-intron-exon-intron-exon-intron-exon-intron-exon-intron-exon-intron-intron-exon-intron-exon-intron-exon-intron-exon-intron-exon-intron-exon-intron-exon-intron-exon-intron-exo…
NC_031969.2	23488279	23511467	gi|1110938500|ref|XM_019357842.1|	PREDICTED: Oreochromis niloticus myosin heavy chain, fast skeletal muscle (LOC100706261), mRNA	1	23219	23219	exon-intron-exon-intron-exon-intron-exon-intron-exon-intron-exon-intron-exon-intron-exon-intron-exon-intron-exon-intron-exon-intron-exon-intron-exon-intron-exon-intron-exon-intron-exon-intron-exon-intron-exon-intron-exon-intron-exon-intron-exon-intron-exon-exon-intron-exon-intron-exon-intron-exon-intron-exon-intron-exon-intron-exon-intron-exon-intron-exon-intron-exon-intron-exon-intron-exon-intro…
NC_031969.2	23488275	23511463	gi|1110938500|ref|XM_019357842.1|	PREDICTED: Oreochromis niloticus myosin heavy chain, fast skeletal muscle (LOC100706261), mRNA	1	23219	23219	intron-exon-intron-exon-intron-exon-intron-exon-intron-exon-intron-exon-intron-exon-intron-exon-intron-exon-intron-exon-intron-exon-intron-exon-intron-exon-intron-exon-intron-exon-intron-exon-intron-exon-intron-exon-intron-exon-intron-exon-intron-exon-intron-exon-exon-intron-exon-intron-exon-intron-exon-intron-exon-intron-exon-intron-exon-intron-exon-intron-exon-intron-exon-intron-exon-intron-exo…
NC_031969.2	23487087	23551104	gi|118495715|dbj|AB270897.1|	Oreochromis niloticus MHC class IA antigen UBA1, UBA2, UAA1 genes, partial cds, UAA3 and UAA2 pseudogenes, UAA4, UAA5 and UAA6 pseudogene fragments	1	64048	64048	exon-intron-exon-intron-exon-intron-exon-intron-exon-intron-exon-intron-exon-intron-exon-intron-exon-intron-exon-intron-exon-intron-exon-intron-exon-intron-exon-intron-exon-intron-exon-intron-exon-intron-exon-intron-exon-intron-exon-intron-exon-intron-exon-intron-exon-intron-exon-intron-exon-intron-exon-exon-intron-exon-intron-exon-intron-exon-intron-exon-intron-exon-intron-exon-intron-exon-intro…
NC_031969.2	23487087	23510401	gi|1110938500|ref|XM_019357842.1|	PREDICTED: Oreochromis niloticus myosin heavy chain, fast skeletal muscle (LOC100706261), mRNA	1	23345	23345	exon-intron-exon-intron-exon-intron-exon-intron-exon-intron-exon-intron-exon-intron-exon-intron-exon-intron-exon-intron-exon-intron-exon-intron-exon-intron-exon-intron-exon-intron-exon-intron-exon-intron-exon-intron-exon-intron-exon-intron-exon-intron-exon-intron-exon-intron-exon-intron-exon-intron-exon-exon-intron-exon-intron-exon-intron-exon-intron-exon-intron-exon-intron-exon-intron-exon-intro…
NC_031969.2	23486594	23550491	gi|118495715|dbj|AB270897.1|	Oreochromis niloticus MHC class IA antigen UBA1, UBA2, UAA1 genes, partial cds, UAA3 and UAA2 pseudogenes, UAA4, UAA5 and UAA6 pseudogene fragments	1	63928	63928	exon-intron-exon-intron-exon-intron-exon-intron-exon-intron-exon-intron-exon-intron-exon-intron-exon-intron-exon-intron-exon-intron-exon-intron-exon-intron-exon-intron-exon-intron-exon-intron-exon-intron-exon-intron-exon-intron-exon-intron-exon-intron-exon-intron-exon-intron-exon-intron-exon-intron-exon-intron-exon-exon-intron-exon-intron-exon-intron-exon-intron-exon-intron-exon-intron-exon-intro…
NC_031969.2	23486594	23509903	gi|1434918605|ref|XM_019357829.2|	PREDICTED: Oreochromis niloticus myosin heavy chain, fast skeletal muscle (LOC100712344), mRNA	1	23340	23340	exon-intron-exon-intron-exon-intron-exon-intron-exon-intron-exon-intron-exon-intron-exon-intron-exon-intron-exon-intron-exon-intron-exon-intron-exon-intron-exon-intron-exon-intron-exon-intron-exon-intron-exon-intron-exon-intron-exon-intron-exon-intron-exon-intron-exon-intron-exon-intron-exon-intron-exon-intron-exon-exon-intron-exon-intron-exon-intron-exon-intron-exon-intron-exon-intron-exon-intro…
NC_031969.2	23486360	23550235	gi|118495715|dbj|AB270897.1|	Oreochromis niloticus MHC class IA antigen UBA1, UBA2, UAA1 genes, partial cds, UAA3 and UAA2 pseudogenes, UAA4, UAA5 and UAA6 pseudogene fragments	1	63906	63906	exon-intron-exon-intron-exon-intron-exon-intron-exon-intron-exon-intron-exon-intron-exon-intron-exon-intron-exon-intron-exon-intron-exon-intron-exon-intron-exon-intron-exon-intron-exon-intron-exon-intron-exon-intron-exon-intron-exon-intron-exon-intron-exon-intron-exon-intron-exon-intron-exon-intron-exon-intron-exon-intron-exon-exon-intron-exon-intron-exon-intron-exon-intron-exon-intron-exon-intro…
NC_031969.2	23486360	23509631	gi|1434918605|ref|XM_019357829.2|	PREDICTED: Oreochromis niloticus myosin heavy chain, fast skeletal muscle (LOC100712344), mRNA	1	23302	23302	exon-intron-exon-intron-exon-intron-exon-intron-exon-intron-exon-intron-exon-intron-exon-intron-exon-intron-exon-intron-exon-intron-exon-intron-exon-intron-exon-intron-exon-intron-exon-intron-exon-intron-exon-intron-exon-intron-exon-intron-exon-intron-exon-intron-exon-intron-exon-intron-exon-intron-exon-intron-exon-intron-exon-exon-intron-exon-intron-exon-intron-exon-intron-exon-intron-exon-intro…
NC_031969.2	23485172	23548961	gi|118495715|dbj|AB270897.1|	Oreochromis niloticus MHC class IA antigen UBA1, UBA2, UAA1 genes, partial cds, UAA3 and UAA2 pseudogenes, UAA4, UAA5 and UAA6 pseudogene fragments	1	63820	63820	exon-intron-exon-intron-exon-intron-exon-intron-exon-intron-exon-intron-exon-intron-exon-intron-exon-intron-exon-intron-exon-intron-exon-intron-exon-intron-exon-intron-exon-intron-exon-intron-exon-intron-exon-intron-exon-intron-exon-intron-exon-intron-exon-intron-exon-intron-exon-intron-exon-intron-exon-intron-exon-intron-exon-intron-exon-intron-exon-intron-exon-intron-exon-exon-intron-exon-intro…
NC_031969.2	23483732	23507014	gi|1434918605|ref|XM_019357829.2|	PREDICTED: Oreochromis niloticus myosin heavy chain, fast skeletal muscle (LOC100712344), mRNA	1	23313	23313	exon-intron-exon-intron-exon-intron-exon-intron-exon-intron-exon-intron-exon-intron-exon-intron-exon-intron-exon-intron-exon-intron-exon-intron-exon-intron-exon-intron-exon-intron-exon-intron-exon-intron-exon-intron-exon-intron-exon-intron-exon-intron-exon-intron-exon-intron-exon-intron-exon-intron-exon-intron-exon-intron-exon-intron-exon-intron-exon-intron-exon-intron-exon-intron-exon-intron-exo…
NC_031969.2	23478896	23493590	gi|1434918605|ref|XM_019357829.2|	PREDICTED: Oreochromis niloticus myosin heavy chain, fast skeletal muscle (LOC100712344), mRNA	1	14725	14725	exon-intron-exon-intergenic-exon-intron-exon-intron-exon-intron-exon-intron-exon-intron-exon-intron-exon-intron-exon-intron-exon-intron-exon-intron-exon-intron-exon-intron-exon-intron-exon-intron-exon-intron-exon-intron-exon-intron-exon-intron-exon-intron-exon-intron-exon-intron-exon-intron-exon-intron-exon-intron-exon-intron-exon-intron-exon-intron-exon-intron-exon-intron-exon-intron-exon-intron…
NC_031969.2	23473360	23487706	gi|1434918605|ref|XM_019357829.2|	PREDICTED: Oreochromis niloticus myosin heavy chain, fast skeletal muscle (LOC100712344), mRNA	1	14377	14377	exon-intron-exon-intron-exon-intron-exon-intron-exon-intron-exon-intron-exon-intron-exon-intron-exon-intron-exon-intron-exon-intron-exon-intron-exon-intron-exon-intron-exon-intron-exon-intron-exon-intron-exon-intron-exon-exon-intron-exon-intron-exon-intron-exon-intergenic-exon-intron-exon-intron-exon-intron-exon-intron-exon-intron-exon-intron-exon-intron-exon-intron-exon-intron-exon-intron-exon-i…
NC_031969.2	23472116	23550491	gi|118495715|dbj|AB270897.1|	Oreochromis niloticus MHC class IA antigen UBA1, UBA2, UAA1 genes, partial cds, UAA3 and UAA2 pseudogenes, UAA4, UAA5 and UAA6 pseudogene fragments	1	78406	78406	exon-intron-exon-intron-exon-intron-exon-intron-exon-intron-exon-intron-exon-intron-exon-intron-exon-intron-exon-intron-exon-intron-exon-intron-exon-intron-exon-intron-exon-intron-exon-intron-exon-intron-exon-intron-exon-intron-exon-intron-exon-intron-exon-intron-exon-exon-intron-exon-intron-exon-intron-exon-intergenic-exon-intron-exon-intron-exon-intron-exon-intron-exon-intron-exon-intron-exon-i…
NC_031969.2	23472116	23486486	gi|1434918606|ref|XM_019357830.2|	PREDICTED: Oreochromis niloticus myosin heavy chain, fast skeletal muscle (LOC100702068), mRNA	1	14401	14401	exon-intron-exon-intron-exon-intron-exon-intron-exon-intron-exon-intron-exon-intron-exon-intron-exon-intron-exon-intron-exon-intron-exon-intron-exon-intron-exon-intron-exon-intron-exon-intron-exon-intron-exon-intron-exon-intron-exon-intron-exon-intron-exon-intron-exon-exon-intron-exon-intron-exon-intron-exon-intergenic-exon-intron-exon-intron-exon-intron-exon-intron-exon-intron-exon-intron-exon-i…
NC_031969.2	23471286	23509201	gi|1434918606|ref|XM_019357830.2|	PREDICTED: Oreochromis niloticus myosin heavy chain, fast skeletal muscle (LOC100702068), mRNA	1	37946	37946	exon-intron-exon-intron-exon-intron-exon-intron-exon-intron-exon-intron-exon-intron-exon-intron-exon-intron-exon-intron-exon-intron-exon-intron-exon-intron-exon-intron-exon-intron-exon-intron-exon-intron-exon-intron-exon-intron-exon-intron-exon-intron-exon-intron-exon-intron-exon-intron-exon-intron-exon-exon-intron-exon-intron-exon-intron-exon-intergenic-exon-intron-exon-intron-exon-intron-exon-i…
NC_031969.2	23470437	23484797	gi|1434918606|ref|XM_019357830.2|	PREDICTED: Oreochromis niloticus myosin heavy chain, fast skeletal muscle (LOC100702068), mRNA	1	14391	14391	exon-intron-exon-intron-exon-intron-exon-intron-exon-intron-exon-intron-exon-intron-exon-intron-exon-intron-exon-intron-exon-intron-exon-intron-exon-intron-exon-intron-exon-intron-exon-intron-exon-intron-exon-intron-exon-intron-exon-intron-exon-intron-exon-intron-exon-intron-exon-intron-exon-intron-exon-intron-exon-intron-exon-intron-exon-exon-intron-exon-intron-exon-intron-exon-intergenic-exon-i…
NC_031969.2	23468599	23482865	gi|1434918606|ref|XM_019357830.2|	PREDICTED: Oreochromis niloticus myosin heavy chain, fast skeletal muscle (LOC100702068), mRNA	1	14297	14297	exon-intron-exon-intron-exon-intron-exon-intron-exon-intron-exon-intron-exon-intron-exon-intron-exon-intron-exon-intron-exon-intron-exon-intron-exon-intron-exon-intron-exon-intron-exon-intron-exon-intron-exon-intron-exon-intron-exon-intron-exon-intron-exon-intron-exon-intron-exon-intron-exon-intron-exon-intron-exon-intron-exon-intron-exon-intron-exon-intron-exon-intron-exon-intron-exon-intron-exo…
NC_031969.2	23458475	23511467	gi|1110938500|ref|XM_019357842.1|	PREDICTED: Oreochromis niloticus myosin heavy chain, fast skeletal muscle (LOC100706261), mRNA	1	53023	53023	exon-intron-exon-intron-exon-intron-exon-intron-exon-intron-exon-intron-exon-intron-exon-intron-exon-intron-exon-intron-exon-intron-exon-intron-exon-exon-intron-exon-intron-exon-intron-exon-intron-exon-intron-exon-intron-exon-intron-exon-intron-exon-intergenic-exon-intron-exon-intron-exon-intron-exon-intron-exon-intron-exon-intron-exon-intron-exon-intron-exon-intron-exon-intron-exon-intron-exon-i…
NC_031969.2	23458471	23511463	gi|1110938500|ref|XM_019357842.1|	PREDICTED: Oreochromis niloticus myosin heavy chain, fast skeletal muscle (LOC100706261), mRNA	1	53023	53023	intron-exon-intron-exon-intron-exon-intron-exon-intron-exon-intron-exon-intron-exon-intron-exon-intron-exon-intron-exon-intron-exon-intron-exon-intron-exon-exon-intron-exon-intron-exon-intron-exon-intron-exon-intron-exon-intron-exon-intron-exon-intron-exon-intergenic-exon-intron-exon-intron-exon-intron-exon-intron-exon-intron-exon-intron-exon-intron-exon-intron-exon-intron-exon-intron-exon-intron…
NC_031969.2	23458035	23487706	gi|1434918606|ref|XM_019357830.2|	PREDICTED: Oreochromis niloticus myosin heavy chain, fast skeletal muscle (LOC100702068), mRNA	1	29702	29702	exon-intron-exon-intron-exon-intron-exon-intron-exon-intron-exon-intron-exon-intron-exon-intron-exon-intron-exon-intron-exon-intron-exon-intron-exon-intron-exon-exon-intron-exon-intron-exon-intron-exon-intron-exon-intron-exon-intron-exon-intron-exon-intron-exon-intergenic-exon-intron-exon-intron-exon-intron-exon-intron-exon-intron-exon-intron-exon-intron-exon-intron-exon-intron-exon-intron-exon-i…
NC_031969.2	23456790	23550491	gi|118495715|dbj|AB270897.1|	Oreochromis niloticus MHC class IA antigen UBA1, UBA2, UAA1 genes, partial cds, UAA3 and UAA2 pseudogenes, UAA4, UAA5 and UAA6 pseudogene fragments	1	93732	93732	exon-intron-exon-intron-exon-intron-exon-intron-exon-intron-exon-intron-exon-intron-exon-intron-exon-intron-exon-intron-exon-intron-exon-intron-exon-intron-exon-intron-exon-intron-exon-intron-exon-intron-exon-exon-intron-exon-intron-exon-intron-exon-intron-exon-intron-exon-intron-exon-intron-exon-intron-exon-intergenic-exon-intron-exon-intron-exon-intron-exon-intron-exon-intron-exon-intron-exon-i…
NC_031969.2	23456790	23486486	gi|1434918606|ref|XM_019357830.2|	PREDICTED: Oreochromis niloticus myosin heavy chain, fast skeletal muscle (LOC100702068), mRNA	1	29727	29727	exon-intron-exon-intron-exon-intron-exon-intron-exon-intron-exon-intron-exon-intron-exon-intron-exon-intron-exon-intron-exon-intron-exon-intron-exon-intron-exon-intron-exon-intron-exon-intron-exon-intron-exon-exon-intron-exon-intron-exon-intron-exon-intron-exon-intron-exon-intron-exon-intron-exon-intron-exon-intergenic-exon-intron-exon-intron-exon-intron-exon-intron-exon-intron-exon-intron-exon-i…
NC_031969.2	23456790	23472010	gi|1434918604|ref|XM_019357827.2|	PREDICTED: Oreochromis niloticus myosin heavy chain, fast skeletal muscle (LOC102083013), mRNA	1	15251	15251	exon-intron-exon-intron-exon-intron-exon-intron-exon-intron-exon-intron-exon-intron-exon-intron-exon-intron-exon-intron-exon-intron-exon-intron-exon-intron-exon-intron-exon-intron-exon-intron-exon-intron-exon-exon-intron-exon-intron-exon-intron-exon-intron-exon-intron-exon-intron-exon-intron-exon-intron-exon-intergenic-exon-intron-exon-intron-exon-intron-exon-intron-exon-intron-exon-intron-exon-i…
NC_031969.2	23455960	23509201	gi|1434918606|ref|XM_019357830.2|	PREDICTED: Oreochromis niloticus myosin heavy chain, fast skeletal muscle (LOC100702068), mRNA	1	53272	53272	exon-intron-exon-intron-exon-intron-exon-intron-exon-intron-exon-intron-exon-intron-exon-intron-exon-intron-exon-intron-exon-intron-exon-intron-exon-intron-exon-intron-exon-intron-exon-intron-exon-intron-exon-intron-exon-intron-exon-intron-exon-exon-intron-exon-intron-exon-intron-exon-intron-exon-intron-exon-intron-exon-intron-exon-intron-exon-intergenic-exon-intron-exon-intron-exon-intron-exon-i…
NC_031969.2	23443995	23511467	gi|1110938500|ref|XM_019357842.1|	PREDICTED: Oreochromis niloticus myosin heavy chain, fast skeletal muscle (LOC100706261), mRNA	1	67503	67503	exon-intron-exon-intron-exon-intron-exon-intron-exon-intron-exon-intron-intron-exon-intron-exon-intron-exon-intron-exon-intron-exon-intron-exon-intron-exon-intron-exon-intron-exon-intron-exon-intron-exon-intron-exon-intron-exon-intron-exon-intron-exon-intergenic-exon-intron-exon-intron-exon-intron-exon-intron-exon-intron-exon-intron-exon-intron-exon-intron-exon-intron-exon-intron-exon-intron-exon…
NC_031969.2	23443991	23511463	gi|1110938500|ref|XM_019357842.1|	PREDICTED: Oreochromis niloticus myosin heavy chain, fast skeletal muscle (LOC100706261), mRNA	1	67503	67503	intron-exon-intron-exon-intron-exon-intron-exon-intron-exon-intron-exon-intron-intron-exon-intron-exon-intron-exon-intron-exon-intron-exon-intron-exon-intron-exon-intron-exon-intron-exon-intron-exon-intron-exon-intron-exon-intron-exon-intron-exon-intron-exon-intergenic-exon-intron-exon-intron-exon-intron-exon-intron-exon-intron-exon-intron-exon-intron-exon-intron-exon-intron-exon-intron-exon-intr…
NC_031969.2	23443555	23487706	gi|1434918606|ref|XM_019357830.2|	PREDICTED: Oreochromis niloticus myosin heavy chain, fast skeletal muscle (LOC100702068), mRNA	1	44182	44182	exon-intron-exon-intron-exon-intron-exon-intron-exon-intron-exon-intron-exon-intron-intron-exon-intron-exon-intron-exon-intron-exon-intron-exon-intron-exon-intron-exon-intron-exon-intron-exon-intron-exon-intron-exon-intron-exon-intron-exon-intron-exon-intron-exon-intergenic-exon-intron-exon-intron-exon-intron-exon-intron-exon-intron-exon-intron-exon-intron-exon-intron-exon-intron-exon-intron-exon…
NC_031969.2	23442408	23486692	gi|1434918606|ref|XM_019357830.2|	PREDICTED: Oreochromis niloticus myosin heavy chain, fast skeletal muscle (LOC100702068), mRNA	1	44315	44315	exon-intron-exon-intron-exon-intron-exon-intron-exon-intron-exon-intron-exon-intron-exon-intron-exon-intron-exon-intron-exon-intron-intron-exon-intron-exon-intron-exon-intron-exon-intron-exon-intron-exon-intron-exon-intron-exon-intron-exon-intron-exon-intron-exon-intron-exon-intron-exon-intron-exon-intron-exon-intergenic-exon-intron-exon-intron-exon-intron-exon-intron-exon-intron-exon-intron-exon…
NC_031969.2	23442309	23486486	gi|1434918606|ref|XM_019357830.2|	PREDICTED: Oreochromis niloticus myosin heavy chain, fast skeletal muscle (LOC100702068), mRNA	1	44208	44208	exon-intron-exon-intron-exon-intron-exon-intron-exon-intron-exon-intron-exon-intron-exon-intron-exon-intron-exon-intron-exon-intron-intron-exon-intron-exon-intron-exon-intron-exon-intron-exon-intron-exon-intron-exon-intron-exon-intron-exon-intron-exon-intron-exon-intron-exon-intron-exon-intron-exon-intron-exon-intergenic-exon-intron-exon-intron-exon-intron-exon-intron-exon-intron-exon-intron-exon…
NC_031969.2	23442309	23472010	gi|1434918604|ref|XM_019357827.2|	PREDICTED: Oreochromis niloticus myosin heavy chain, fast skeletal muscle (LOC102083013), mRNA	1	29732	29732	exon-intron-exon-intron-exon-intron-exon-intron-exon-intron-exon-intron-exon-intron-exon-intron-exon-intron-exon-intron-exon-intron-intron-exon-intron-exon-intron-exon-intron-exon-intron-exon-intron-exon-intron-exon-intron-exon-intron-exon-intron-exon-intron-exon-intron-exon-intron-exon-intron-exon-intron-exon-intergenic-exon-intron-exon-intron-exon-intron-exon-intron-exon-intron-exon-intron-exon…
NC_031969.2	23441480	23509201	gi|1434918652|ref|XM_019357841.2|	PREDICTED: Oreochromis niloticus myosin heavy chain, fast skeletal muscle (LOC100698204), mRNA	1	67752	67752	exon-intron-exon-intron-exon-intron-exon-intron-exon-intron-exon-intron-exon-intron-exon-intron-exon-intron-exon-intron-exon-intron-exon-intron-exon-intron-exon-intron-intron-exon-intron-exon-intron-exon-intron-exon-intron-exon-intron-exon-intron-exon-intron-exon-intron-exon-intron-exon-intron-exon-intron-exon-intron-exon-intron-exon-intron-exon-intergenic-exon-intron-exon-intron-exon-intron-exon…
NC_031969.2	23440639	23484797	gi|1434918652|ref|XM_019357841.2|	PREDICTED: Oreochromis niloticus myosin heavy chain, fast skeletal muscle (LOC100698204), mRNA	1	44189	44189	exon-intron-exon-intron-exon-intron-exon-intron-exon-intron-exon-intron-exon-intron-exon-intron-exon-intron-exon-intron-exon-intron-exon-intron-exon-intron-exon-intron-exon-intron-exon-intron-exon-intron-intron-exon-intron-exon-intron-exon-intron-exon-intron-exon-intron-exon-intron-exon-intron-exon-intron-exon-intron-exon-intron-exon-intron-exon-intron-exon-intron-exon-intron-exon-intergenic-exon…
NC_031969.2	23440237	23484401	gi|1434918652|ref|XM_019357841.2|	PREDICTED: Oreochromis niloticus myosin heavy chain, fast skeletal muscle (LOC100698204), mRNA	1	44195	44195	exon-intron-exon-intron-exon-intron-exon-intron-exon-intron-exon-intron-exon-intron-exon-intron-exon-intron-exon-intron-exon-intron-exon-intron-exon-intron-exon-intron-exon-intron-exon-intron-exon-intron-exon-intron-intron-exon-intron-exon-intron-exon-intron-exon-intron-exon-intron-exon-intron-exon-intron-exon-intron-exon-intron-exon-intron-exon-intron-exon-intron-exon-intron-exon-intron-exon-int…
NC_031969.2	23412055	23486486	gi|1434918652|ref|XM_019357841.2|	PREDICTED: Oreochromis niloticus myosin heavy chain, fast skeletal muscle (LOC100698204), mRNA	1	74462	74462	exon-intron-exon-exon-intron-exon-intron-exon-intron-exon-intron-exon-intron-exon-intron-exon-intron-exon-intron-exon-intron-exon-intron-exon-intron-exon-intron-exon-intron-exon-intron-exon-intron-exon-intron-exon-intron-exon-intron-exon-intron-exon-intron-exon-intron-exon-intron-exon-exon-intron-exon-intron-exon-intergenic-exon-intron-exon-intron-exon-intron-exon-intron-exon-intron-exon-intron-e…
NC_031969.2	23412055	23472010	gi|1434918652|ref|XM_019357841.2|	PREDICTED: Oreochromis niloticus myosin heavy chain, fast skeletal muscle (LOC100698204), mRNA	1	59986	59986	exon-intron-exon-exon-intron-exon-intron-exon-intron-exon-intron-exon-intron-exon-intron-exon-intron-exon-intron-exon-intron-exon-intron-exon-intron-exon-intron-exon-intron-exon-intron-exon-intron-exon-intron-exon-intron-exon-intron-exon-intron-exon-intron-exon-intron-exon-intron-exon-exon-intron-exon-intron-exon-intergenic-exon-intron-exon-intron-exon-intron-exon-intron-exon-intron-exon-intron-e…
NC_031969.2	23411333	23509201	gi|1434918653|ref|XM_019357843.2|	PREDICTED: Oreochromis niloticus myosin heavy chain, fast skeletal muscle (LOC100689722), mRNA	1	97899	97899	exon-intron-exon-intron-exon-intron-exon-intron-exon-exon-intron-exon-intron-exon-intron-exon-intron-exon-intron-exon-intron-exon-intron-exon-intron-exon-intron-exon-intron-exon-intron-exon-intron-exon-intron-exon-intron-exon-intron-exon-intron-exon-intron-exon-intron-exon-intron-exon-intron-exon-intron-exon-intron-exon-exon-intron-exon-intron-exon-intergenic-exon-intron-exon-intron-exon-intron-e…
NC_031969.2	23410492	23484797	gi|1434918653|ref|XM_019357843.2|	PREDICTED: Oreochromis niloticus myosin heavy chain, fast skeletal muscle (LOC100689722), mRNA	1	74336	74336	exon-intron-exon-intron-exon-intron-exon-intron-exon-intron-exon-intron-exon-intron-exon-exon-intron-exon-intron-exon-intron-exon-intron-exon-intron-exon-intron-exon-intron-exon-intron-exon-intron-exon-intron-exon-intron-exon-intron-exon-intron-exon-intron-exon-intron-exon-intron-exon-intron-exon-intron-exon-intron-exon-intron-exon-intron-exon-intron-exon-exon-intron-exon-intron-exon-intergenic-e…
NC_031969.2	23402663	23484797	gi|1434918653|ref|XM_019357843.2|	PREDICTED: Oreochromis niloticus myosin heavy chain, fast skeletal muscle (LOC100689722), mRNA	1	82165	82165	intron-exon-intron-exon-intron-exon-intron-exon-intron-exon-intergenic-exon-intron-exon-intron-exon-intron-exon-intron-exon-intron-exon-intron-exon-intron-exon-intron-exon-intron-exon-intron-exon-intron-exon-intron-exon-intron-exon-intron-exon-intron-exon-exon-intron-exon-intron-exon-intron-exon-intron-exon-intron-exon-intron-exon-intron-exon-intron-exon-intron-exon-intron-exon-intron-exon-intron…
NC_031969.2	23402281	23484401	gi|1434918653|ref|XM_019357843.2|	PREDICTED: Oreochromis niloticus myosin heavy chain, fast skeletal muscle (LOC100689722), mRNA	1	82151	82151	exon-intron-exon-intron-exon-intron-exon-intron-exon-intron-exon-intergenic-exon-intron-exon-intron-exon-intron-exon-intron-exon-intron-exon-intron-exon-intron-exon-intron-exon-intron-exon-intron-exon-intron-exon-intron-exon-intron-exon-intron-exon-intron-exon-exon-intron-exon-intron-exon-intron-exon-intron-exon-intron-exon-intron-exon-intron-exon-intron-exon-intron-exon-intron-exon-intron-exon-i…
NC_031969.2	23390940	23487706	gi|1434918653|ref|XM_019357843.2|	PREDICTED: Oreochromis niloticus myosin heavy chain, fast skeletal muscle (LOC100689722), mRNA	1	96797	96797	exon-intron-exon-intron-exon-intron-exon-intron-exon-intron-exon-intron-exon-intron-exon-intron-exon-intron-exon-intron-exon-intron-exon-intron-intron-exon-intron-exon-intron-exon-intron-exon-intron-exon-intron-exon-intron-exon-intron-exon-intergenic-exon-intron-exon-intron-exon-intron-exon-intron-exon-intron-exon-intron-exon-intron-exon-intergenic-exon-intron-exon-intron-exon-intron-exon-intron-…
NC_031969.2	23389225	23486233	gi|1434918653|ref|XM_019357843.2|	PREDICTED: Oreochromis niloticus myosin heavy chain, fast skeletal muscle (LOC100689722), mRNA	1	97039	97039	exon-intron-exon-intron-exon-intron-exon-intron-exon-intron-exon-intron-exon-intron-exon-intron-exon-intron-exon-intron-exon-intron-exon-intron-exon-intron-exon-intron-exon-intron-exon-intron-exon-intron-intron-exon-intron-exon-intron-exon-intron-exon-intron-exon-intron-exon-intron-exon-intron-exon-intergenic-exon-intron-exon-intron-exon-intron-exon-intron-exon-intron-exon-intron-exon-intron-exon…
NC_031969.2	23389225	23471756	gi|1434918653|ref|XM_019357843.2|	PREDICTED: Oreochromis niloticus myosin heavy chain, fast skeletal muscle (LOC100689722), mRNA	1	82562	82562	exon-intron-exon-intron-exon-intron-exon-intron-exon-intron-exon-intron-exon-intron-exon-intron-exon-intron-exon-intron-exon-intron-exon-intron-exon-intron-exon-intron-exon-intron-exon-intron-exon-intron-intron-exon-intron-exon-intron-exon-intron-exon-intron-exon-intron-exon-intron-exon-intron-exon-intergenic-exon-intron-exon-intron-exon-intron-exon-intron-exon-intron-exon-intron-exon-intron-exon…
NC_031969.2	23389225	23456430	gi|1434918653|ref|XM_019357843.2|	PREDICTED: Oreochromis niloticus myosin heavy chain, fast skeletal muscle (LOC100689722), mRNA	1	67236	67236	exon-intron-exon-intron-exon-intron-exon-intron-exon-intron-exon-intron-exon-intron-exon-intron-exon-intron-exon-intron-exon-intron-exon-intron-exon-intron-exon-intron-exon-intron-exon-intron-exon-intron-intron-exon-intron-exon-intron-exon-intron-exon-intron-exon-intron-exon-intron-exon-intron-exon-intergenic-exon-intron-exon-intron-exon-intron-exon-intron-exon-intron-exon-intron-exon-intron-exon…
NC_031969.2	23389225	23441949	gi|1434918653|ref|XM_019357843.2|	PREDICTED: Oreochromis niloticus myosin heavy chain, fast skeletal muscle (LOC100689722), mRNA	1	52755	52755	exon-intron-exon-intron-exon-intron-exon-intron-exon-intron-exon-intron-exon-intron-exon-intron-exon-intron-exon-intron-exon-intron-exon-intron-exon-intron-exon-intron-exon-intron-exon-intron-exon-intron-intron-exon-intron-exon-intron-exon-intron-exon-intron-exon-intron-exon-intron-exon-intron-exon-intergenic-exon-intron-exon-intron-exon-intron-exon-intron-exon-intron-exon-intron-exon-intron-exon…
NC_031969.2	23387692	23484797	gi|1434918653|ref|XM_019357843.2|	PREDICTED: Oreochromis niloticus myosin heavy chain, fast skeletal muscle (LOC100689722), mRNA	1	97136	97136	exon-intron-exon-intron-exon-intron-exon-intron-exon-intron-exon-intron-exon-intron-exon-intron-exon-intron-exon-intron-exon-intron-exon-intron-exon-intron-exon-intron-exon-intron-exon-intron-exon-intron-exon-intron-exon-intron-exon-intron-exon-intron-exon-intron-intron-exon-intron-exon-intron-exon-intron-exon-intron-exon-intron-exon-intron-exon-intron-exon-intergenic-exon-intron-exon-intron-exon…
NC_031969.2	23387268	23484401	gi|1434918653|ref|XM_019357843.2|	PREDICTED: Oreochromis niloticus myosin heavy chain, fast skeletal muscle (LOC100689722), mRNA	1	97164	97164	exon-intron-exon-intron-exon-intron-exon-intron-exon-intron-exon-intron-exon-intron-exon-intron-exon-intron-exon-intron-exon-intron-exon-intron-exon-intron-exon-intron-exon-intron-exon-intron-exon-intron-exon-intron-exon-intron-exon-intron-exon-intron-exon-intron-exon-intron-intron-exon-intron-exon-intron-exon-intron-exon-intron-exon-intron-exon-intron-exon-intron-exon-intergenic-exon-intron-exon…
NC_031969.2	23385596	23483192	gi|1434918653|ref|XM_019357843.2|	PREDICTED: Oreochromis niloticus myosin heavy chain, fast skeletal muscle (LOC100689722), mRNA	1	97627	97627	exon-intron-exon-intergenic-exon-intron-exon-intron-exon-intron-exon-intron-exon-intron-exon-intron-exon-intron-exon-intron-exon-intron-exon-intron-exon-intron-exon-intron-exon-intron-exon-intron-exon-intron-exon-intron-exon-intron-exon-intron-exon-intron-exon-intron-exon-intron-exon-intron-exon-intron-exon-intron-exon-intron-exon-intron-intron-exon-intron-exon-intron-exon-intron-exon-intron-exon…
NC_031969.2	19764980	19833796	gi|1434915810|ref|XM_013274300.3|	PREDICTED: Oreochromis niloticus nuclear GTPase SLIP-GC (LOC102081603), transcript variant X8, mRNA	1	68847	68847	exon-intron-exon-intron-exon-intron-exon-intron-exon-intron-exon-intron-exon-intron-exon-intron-exon-intron-exon-intron-exon-intron-exon-intron-exon-intron-exon-intron-exon-intron-exon-intron-exon-intron-exon-intron-exon-intron-exon-intron-exon-exon-exon-exon-intron-exon-intron-exon-intron-exon-intron-exon-exon-intron-exon-intron-exon-intron-exon-intron-exon-intron-exon-intron-exon-intron-exon-in…
NC_031969.2	18120322	18122039	gi|1434918547|ref|XM_025906611.1|	PREDICTED: Oreochromis niloticus ribosomal protein S2 (rps2), transcript variant X2, mRNA	1	1748	1748	exon-intron-exon-exon-intron-exon-intron-exon-intron-exon-exon-exon-intron-
NC_031969.2	13878039	13878214	gi|1434919955|ref|XM_019358079.2|	PREDICTED: Oreochromis niloticus xylosyltransferase 2 (xylt2), transcript variant X2, mRNA	1	206	206	exon-exon-
NC_031969.2	11197173	11268870	gi|1381400542|ref|XM_024806457.1|	PREDICTED: Maylandia zebra retrovirus-related Pol polyprotein from transposon 412 (LOC106674641), mRNA	1	71728	71728	exon-exon-intergenic-exon-intron-exon-intron-intergenic-exon-intron-exon-exon-intron-exon-intron-exon-intron-exon-intron-exon-exon-intron-exon-intron-exon-intron-intron-exon-exon-exon-intron-exon-intron-exon-intergenic-exon-intron-exon-intron-exon-exon-exon-exon-exon-
NC_031967.2	831047	832369	gi|1468922747|ref|XM_026159383.1|	PREDICTED: Astatotilapia calliptera ankyrin 2 (ank2), transcript variant X12, mRNA	1	1349	1349	exon-
NC_031967.2	830291	832369	gi|1468922747|ref|XM_026159383.1|	PREDICTED: Astatotilapia calliptera ankyrin 2 (ank2), transcript variant X12, mRNA	1	2105	2105	exon-
NC_031967.2	830102	832369	gi|1468922747|ref|XM_026159383.1|	PREDICTED: Astatotilapia calliptera ankyrin 2 (ank2), transcript variant X12, mRNA	1	2294	2294	exon-
NC_031967.2	830091	832358	gi|1468922727|ref|XM_026159302.1|	PREDICTED: Astatotilapia calliptera ankyrin 2 (ank2), transcript variant X2, mRNA	1	2294	2294	exon-
NC_031967.2	829535	830479	gi|1468922743|ref|XM_026159369.1|	PREDICTED: Astatotilapia calliptera ankyrin 2 (ank2), transcript variant X10, mRNA	1	971	971	exon-intron-exon-
NC_031967.2	829157	830479	gi|1468922747|ref|XM_026159383.1|	PREDICTED: Astatotilapia calliptera ankyrin 2 (ank2), transcript variant X12, mRNA	1	1349	1349	exon-intron-exon-
NC_031967.2	829146	830468	gi|1468922753|ref|XM_026159410.1|	PREDICTED: Astatotilapia calliptera ankyrin 2 (ank2), transcript variant X15, mRNA	1	1349	1349	exon-intron-exon-
NC_031967.2	7417222	7418306	gi|1434912255|ref|XM_005455235.4|	PREDICTED: Oreochromis niloticus fibroblast growth factor 11 (fgf11), mRNA	1	1113	1113	exon-
NC_031967.2	72203859	72231003	gi|1434908026|ref|XM_025900455.1|	PREDICTED: Oreochromis niloticus butyrophilin-like protein 2 (LOC102076415), transcript variant X4, mRNA	1	27175	27175	intron-exon-intron-exon-intergenic-exon-exon-intron-exon-intron-exon-intron-exon-intron-exon-exon-exon-intron-intron-
NC_031967.2	72203841	72230985	gi|1434908026|ref|XM_025900455.1|	PREDICTED: Oreochromis niloticus butyrophilin-like protein 2 (LOC102076415), transcript variant X4, mRNA	1	27175	27175	intron-exon-intron-exon-intergenic-exon-exon-intron-exon-intron-exon-intron-exon-intron-exon-exon-exon-intron-intron-
NC_031967.2	59223203	59231191	gi|923877940|ref|XM_005753844.2|	PREDICTED: Pundamilia nyererei signal-regulatory protein beta-2-like (LOC102204492), mRNA	1	8019	8019	exon-intron-exon-exon-exon-intron-
NC_031967.2	54232158	54237101	gi|1434913468|ref|XM_019356954.2|	PREDICTED: Oreochromis niloticus carcinoembryonic antigen-related cell adhesion molecule 1-like (LOC109201339), mRNA	1	4974	4974	exon-intron-exon-intergenic-exon-
NC_031967.2	37631285	37632881	gi|1434910641|ref|XM_005459544.4|	PREDICTED: Oreochromis niloticus dachshund homolog 2 (LOC100706586), mRNA	1	1627	1627	exon-intron-exon-intron-exon-
NC_031967.2	35866635	35941477	gi|1434909252|ref|XM_019354298.2|	PREDICTED: Oreochromis niloticus histone H1-like (LOC109198950), mRNA	1	74873	74873	exon-intron-exon-intron-exon-intron-exon-intron-exon-intron-exon-exon-intron-exon-intron-exon-intron-exon-intron-exon-exon-exon-intron-exon-intron-exon-intron-exon-intron-exon-intron-intron-intron-intron-
NC_031967.2	34529259	34537485	gi|1434910514|ref|XM_003457345.5|	PREDICTED: Oreochromis niloticus exocyst complex component 6B (LOC100692758), mRNA	1	8257	8257	exon-intron-exon-intron-exon-intron-
NC_031967.2	32522395	32531855	gi|32352005|dbj|AB101411.1|	Ptyochromis xenognathus DNA, 1424 locus for SINE insertion analysis	1	9491	9491	intron-exon-intron-exon-intron-exon-intron-exon-intron-exon-intron-exon-intron-exon-intron-exon-intron-exon-intron-exon-intron-exon-intron-exon-intron-exon-intron-exon-exon-
NC_031967.2	30181233	30218121	gi|1381361809|ref|XM_024801736.1|	PREDICTED: Maylandia zebra ankyrin repeat and protein kinase domain-containing protein 1-like (LOC112429941), mRNA	1	36919	36919	exon-intron-exon-intron-exon-exon-exon-intron-intron-
NC_031967.2	30181233	30190818	gi|1381361809|ref|XM_024801736.1|	PREDICTED: Maylandia zebra ankyrin repeat and protein kinase domain-containing protein 1-like (LOC112429941), mRNA	1	9616	9616	exon-intron-exon-intron-exon-
NC_031967.2	30181233	30181412	gi|1434912123|ref|XM_025905472.1|	PREDICTED: Oreochromis niloticus NACHT, LRR and PYD domains-containing protein 12-like (LOC102078974), transcript variant X2, mRNA	1	210	210	exon-
NC_031967.2	28982384	29006081	gi|1434908035|ref|XM_025900468.1|	PREDICTED: Oreochromis niloticus NACHT, LRR and PYD domains-containing protein 1b allele 5 (LOC109194346), transcript variant X2, mRNA	1	23728	23728	exon-exon-exon-intron-exon-intron-exon-intron-exon-exon-intron-exon-intron-exon-exon-exon-intron-exon-intron-exon-intron-exon-intron-exon-intron-exon-intron-intergenic-
NC_031967.2	28958888	29006081	gi|1434908035|ref|XM_025900468.1|	PREDICTED: Oreochromis niloticus NACHT, LRR and PYD domains-containing protein 1b allele 5 (LOC109194346), transcript variant X2, mRNA	1	47224	47224	exon-intron-exon-exon-intron-exon-exon-intron-exon-intron-exon-intron-exon-intron-exon-intron-exon-intron-exon-intron-exon-intron-exon-exon-exon-intron-exon-intron-exon-intron-exon-exon-intron-exon-intron-exon-exon-exon-intron-exon-intron-exon-intron-exon-intron-exon-intron-exon-intron-intergenic-intergenic-
NC_031967.2	28935405	29006081	gi|1434908035|ref|XM_025900468.1|	PREDICTED: Oreochromis niloticus NACHT, LRR and PYD domains-containing protein 1b allele 5 (LOC109194346), transcript variant X2, mRNA	1	70707	70707	exon-intron-exon-intron-exon-intron-exon-intron-exon-intron-exon-exon-intron-exon-intron-exon-intron-exon-intron-exon-intron-exon-intron-exon-intron-exon-intron-exon-intron-exon-exon-intron-exon-exon-intron-exon-intron-exon-intron-exon-intron-exon-intron-exon-intron-exon-intron-exon-intron-exon-exon-exon-intron-exon-intron-exon-intron-exon-exon-intron-exon-intron-exon-exon-exon-intron-exon-intron…
NC_031967.2	27787817	27849645	gi|1434914956|ref|XM_019354053.2|	PREDICTED: Oreochromis niloticus mucin-5AC (LOC100707479), mRNA	1	61859	61859	intron-exon-exon-intron-exon-intron-exon-intron-exon-intron-exon-intron-exon-exon-intron-exon-intron-exon-intergenic-exon-intron-exon-intron-exon-intron-exon-intergenic-exon-intron-exon-intron-exon-intergenic-exon-intron-exon-intron-intron-exon-intron-exon-intron-exon-intron-exon-intron-exon-intron-exon-intron-exon-intron-exon-intron-exon-intron-exon-intron-exon-intron-exon-intron-exon-intron-exo…
NC_031967.2	27758224	27849645	gi|118495715|dbj|AB270897.1|	Oreochromis niloticus MHC class IA antigen UBA1, UBA2, UAA1 genes, partial cds, UAA3 and UAA2 pseudogenes, UAA4, UAA5 and UAA6 pseudogene fragments	1	91452	91452	exon-intron-exon-intron-exon-intron-exon-intron-exon-intron-intron-exon-exon-intron-exon-intron-exon-intron-exon-intron-exon-intron-exon-exon-intron-exon-intron-exon-intergenic-exon-intron-exon-intron-exon-intron-exon-intergenic-exon-intron-exon-intron-exon-intergenic-exon-intron-exon-intron-intron-exon-intron-exon-intron-exon-intron-exon-intron-exon-intron-exon-intron-exon-intron-exon-intron-exo…
NC_031967.2	26951301	27030552	gi|1434912988|ref|XM_025905647.1|	PREDICTED: Oreochromis niloticus E3 ubiquitin/ISG15 ligase TRIM25 (LOC102077741), mRNA	1	79282	79282	exon-intergenic-exon-intron-exon-intron-exon-intron-exon-intron-exon-intron-exon-intron-exon-exon-intron-exon-intron-exon-intron-exon-intron-exon-intron-exon-intron-exon-exon-intron-exon-intron-exon-intron-exon-intron-exon-intron-exon-intron-exon-intron-exon-intergenic-exon-intron-exon-intron-exon-intron-exon-intron-exon-intron-exon-intron-exon-intron-intergenic-exon-intron-exon-intron-exon-intro…
NC_031967.2	26951301	27006867	gi|1434912988|ref|XM_025905647.1|	PREDICTED: Oreochromis niloticus E3 ubiquitin/ISG15 ligase TRIM25 (LOC102077741), mRNA	1	55597	55597	exon-intergenic-exon-intron-exon-intron-exon-intron-exon-intron-exon-intron-exon-intron-exon-exon-intron-exon-intron-exon-intron-exon-intron-exon-intron-exon-intron-exon-exon-intron-exon-intron-exon-intron-exon-intron-exon-intron-exon-intron-exon-intron-exon-intergenic-exon-intron-exon-intron-exon-intron-exon-intron-exon-intron-exon-intron-exon-intron-intergenic-exon-intron-exon-intron-exon-intro…
NC_031967.2	26929014	27007164	gi|1434912988|ref|XM_025905647.1|	PREDICTED: Oreochromis niloticus E3 ubiquitin/ISG15 ligase TRIM25 (LOC102077741), mRNA	1	78181	78181	exon-intron-exon-exon-intergenic-exon-intron-exon-intron-exon-intron-exon-intron-exon-intron-exon-intron-exon-exon-intron-exon-intron-exon-intron-exon-intron-exon-intron-exon-intron-exon-exon-intron-exon-intron-exon-intron-exon-intron-exon-intron-exon-intron-exon-intron-exon-intergenic-exon-intron-exon-intron-exon-intron-exon-intron-exon-intron-exon-intron-exon-intron-intergenic-exon-intron-exon-…
NC_031967.2	26929005	27007155	gi|1434912988|ref|XM_025905647.1|	PREDICTED: Oreochromis niloticus E3 ubiquitin/ISG15 ligase TRIM25 (LOC102077741), mRNA	1	78181	78181	exon-intron-exon-exon-intergenic-exon-intron-exon-intron-exon-intron-exon-intron-exon-intron-exon-intron-exon-exon-intron-exon-intron-exon-intron-exon-intron-exon-intron-exon-intron-exon-exon-intron-exon-intron-exon-intron-exon-intron-exon-intron-exon-intron-exon-intron-exon-intergenic-exon-intron-exon-intron-exon-intron-exon-intron-exon-intron-exon-intron-exon-intron-intergenic-exon-intron-exon-…
NC_031967.2	23926109	23929010	gi|1110935331|ref|XM_003447547.4|	PREDICTED: Oreochromis niloticus actinin alpha 3 (actn3), mRNA	1	2932	2932	exon-intron-exon-intron-exon-intron-exon-intron-exon-
NC_031967.2	23925668	23926219	gi|930764359|ref|XM_005945297.2|	PREDICTED: Haplochromis burtoni actinin, alpha 3 (actn3), mRNA	1	582	582	exon-intron-exon-
NC_031967.2	23893702	23930348	gi|1110935331|ref|XM_003447547.4|	PREDICTED: Oreochromis niloticus actinin alpha 3 (actn3), mRNA	1	36677	36677	intergenic-exon-exon-intron-exon-intron-exon-intron-exon-intron-exon-intron-exon-intron-exon-intron-exon-intron-exon-exon-intron-exon-intron-exon-intron-exon-intron-exon-intron-exon-intron-exon-intron-exon-intron-exon-intron-exon-intron-exon-exon-intron-intron-
NC_031967.2	20733725	20781594	gi|923864180|ref|XM_005749465.2|	PREDICTED: Pundamilia nyererei neuronal acetylcholine receptor subunit alpha-2-like (LOC102194301), mRNA	1	47900	47900	exon-intron-exon-intron-exon-intron-exon-intron-exon-exon-intron-exon-intron-intron-intron-
NC_031967.2	20733710	20781579	gi|923864180|ref|XM_005749465.2|	PREDICTED: Pundamilia nyererei neuronal acetylcholine receptor subunit alpha-2-like (LOC102194301), mRNA	1	47900	47900	exon-intron-exon-intron-exon-intron-exon-intron-exon-exon-intron-exon-intron-intron-intron-
NC_031967.2	17744189	17808277	gi|118495715|dbj|AB270897.1|	Oreochromis niloticus MHC class IA antigen UBA1, UBA2, UAA1 genes, partial cds, UAA3 and UAA2 pseudogenes, UAA4, UAA5 and UAA6 pseudogene fragments	1	64119	64119	exon-intron-exon-exon-intergenic-exon-intron-exon-intron-exon-intron-exon-exon-intron-exon-intron-exon-intron-exon-exon-intron-exon-intron-exon-intron-exon-intron-exon-intergenic-exon-exon-intron-exon-intron-exon-intron-exon-intergenic-exon-intron-exon-intron-exon-intron-exon-intergenic-exon-intron-exon-intergenic-intergenic-intron-
NC_031967.2	17263036	17268992	gi|1434912565|ref|XM_003458877.5|	PREDICTED: Oreochromis niloticus acyl-CoA dehydrogenase very long chain (acadvl), mRNA	1	5987	5987	exon-intron-exon-intron-exon-intron-exon-intron-exon-intron-exon-intron-exon-intron-exon-exon-intron-exon-intron-
NC_031967.2	12479057	12482283	gi|1434912771|ref|XM_019352587.2|	PREDICTED: Oreochromis niloticus myozenin-2 (LOC100711584), transcript variant X3, mRNA	1	3257	3257	exon-exon-exon-intron-exon-intron-exon-
NC_031967.2	10565666	10581723	gi|1434911592|ref|XM_005468083.3|	PREDICTED: Oreochromis niloticus pyruvate carboxylase (pc), transcript variant X4, mRNA	1	16088	16088	exon-exon-intron-exon-intron-exon-intron-exon-intron-exon-intron-exon-intron-exon-intron-
NC_031967.2	10501755	10518996	gi|723802023|tpe|BN000676.1|	TPA: Xenopus tropicalis Tc1-like transposon, Beagle	1	17272	17272	exon-intron-intron-exon-intron-exon-intergenic-exon-intron-exon-intron-exon-intron-exon-exon-intron-exon-exon-exon-intron-
NC_031966.2	9414546	9427914	gi|584005444|ref|XM_006797655.1|	PREDICTED: Neolamprologus brichardi matrin-3-like (LOC102787272), mRNA	1	13397	13397	exon-intron-exon-intron-exon-intron-exon-intron-exon-intron-exon-intron-exon-intron-exon-intron-exon-exon-intron-exon-intron-exon-intron-exon-intron-exon-intron-exon-intron-exon-intron-exon-intron-exon-intron-exon-intron-exon-intron-exon-intron-exon-intron-
NC_031966.2	6213691	6214149	gi|1434904444|ref|XM_005453216.4|	PREDICTED: Oreochromis niloticus proton-coupled amino acid transporter 1 (LOC100697342), transcript variant X3, mRNA	1	487	487	exon-intron-exon-intron-exon-
NC_031966.2	29940845	29941924	gi|1434906544|ref|XM_005467991.4|	PREDICTED: Oreochromis niloticus SH3 domain and tetratricopeptide repeat-containing protein 2 (LOC100706213), transcript variant X2, mRNA	1	1110	1110	exon-intron-exon-
NC_031966.2	26619206	26619791	gi|1434906101|ref|XM_005467828.4|	PREDICTED: Oreochromis niloticus heat shock protein family A (Hsp70) member 4 (hspa4), transcript variant X2, mRNA	1	616	616	exon-intron-exon-
NC_031966.2	2346242	2346622	gi|1434904306|ref|XM_019362711.2|	PREDICTED: Oreochromis niloticus casein kinase 1 alpha 1 (csnk1a1), transcript variant X5, mRNA	1	409	409	exon-intron-exon-
NC_031966.2	21354417	21356032	gi|583971973|ref|XM_006781341.1|	PREDICTED: Neolamprologus brichardi probable E3 ubiquitin-protein ligase MID2-like (LOC102785246), transcript variant X5, mRNA	1	1646	1646	exon-intron-exon-
NC_031966.2	20983664	20984055	gi|1331035467|emb|LT972176.1|	NOT ASSIGNED	1	422	422	intergenic-
NC_031966.2	20983603	20984873	gi|1559969728|gb|CP032588.1|	NOT ASSIGNED	1	1301	1301	intergenic-
NC_031966.2	20609666	20611075	gi|1434905483|ref|XM_003444603.5|	PREDICTED: Oreochromis niloticus transforming growth factor beta-2 (LOC100690458), mRNA	1	1440	1440	exon-
NC_031966.2	20330195	20330399	gi|1434905444|ref|XM_005467491.3|	PREDICTED: Oreochromis niloticus serine protease 23 (LOC100707079), mRNA	1	235	235	exon-
NC_031966.2	19855868	19856269	gi|1434905358|ref|XM_005467457.4|	PREDICTED: Oreochromis niloticus phosphatidylinositol 3,4,5-trisphosphate 5-phosphatase 2B (LOC100706013), transcript variant X2, mRNA	1	432	432	exon-intron-exon-
NC_031966.2	17403645	17404264	gi|1434905127|ref|XM_019364388.2|	PREDICTED: Oreochromis niloticus multidrug resistance-associated protein 5 (LOC100710139), transcript variant X2, mRNA	1	650	650	exon-intron-exon-
NC_031966.2	17389009	17402230	gi|1434905127|ref|XM_019364388.2|	PREDICTED: Oreochromis niloticus multidrug resistance-associated protein 5 (LOC100710139), transcript variant X2, mRNA	1	13252	13252	exon-intron-exon-intron-exon-intron-exon-intron-exon-intron-exon-intron-exon-intron-exon-intron-intron-exon-intron-exon-intron-exon-intron-exon-intron-exon-intron-exon-intron-exon-exon-
NC_031966.2	17348968	17356277	gi|1434905125|ref|XM_013271315.3|	PREDICTED: Oreochromis niloticus ecto-NOX disulfide-thiol exchanger 2 (enox2), transcript variant X7, mRNA	1	7340	7340	exon-exon-intron-exon-exon-intron-
NC_031966.2	16487406	16488359	gi|923776682|ref|XM_013908247.1|	PREDICTED: Pundamilia nyererei zinc finger protein 518B (znf518b), mRNA	1	984	984	exon-
NC_031965.2	7604686	7609175	gi|1434901474|ref|XM_019346135.2|	PREDICTED: Oreochromis niloticus neuron navigator 2 (LOC100704374), mRNA	1	4518	4518	exon-intron-exon-intron-exon-intron-exon-
NC_031965.2	64974	67128	gi|28933413|gb|AF472621.1|	Oreochromis niloticus cytochrome P450 aromatase type II gene, complete cds	1	2179	2179	exon-exon-intron-exon-intron-
NC_031965.2	38718395	38718628	gi|930737382|ref|XM_005923979.2|	PREDICTED: Haplochromis burtoni elongation factor Tu GTP binding domain containing 1 (eftud1), transcript variant X2, mRNA	1	264	264	exon-intron-exon-
NC_031965.2	38339313	38339627	gi|930737366|ref|XM_014334106.1|	PREDICTED: Haplochromis burtoni gamma-aminobutyric acid receptor-associated protein-like 2 (LOC102302824), mRNA	1	345	345	exon-intron-exon-
NC_031965.2	37448921	37453960	gi|1434903713|ref|XM_025908301.1|	PREDICTED: Oreochromis niloticus puratrophin-1 (LOC100709838), transcript variant X5, mRNA	1	5070	5070	exon-intron-exon-intron-exon-intron-exon-intron-exon-intron-exon-intron-exon-intron-exon-intron-exon-
NC_031965.2	37435820	37436209	gi|1434903713|ref|XM_025908301.1|	PREDICTED: Oreochromis niloticus puratrophin-1 (LOC100709838), transcript variant X5, mRNA	1	420	420	exon-intron-exon-
NC_031965.2	3543147	3555777	gi|1434901250|ref|XM_019349425.2|	PREDICTED: Oreochromis niloticus PTPRF interacting protein alpha 1 (ppfia1), transcript variant X21, mRNA	1	12659	12659	exon-intron-exon-intron-exon-intron-exon-intron-exon-intron-exon-intron-exon-intron-exon-intron-exon-intron-exon-intron-exon-intron-exon-intron-exon-intron-exon-intron-exon-exon-intron-exon-intron-
NC_031965.2	32914447	32927331	gi|1434903450|ref|XM_019360688.2|	PREDICTED: Oreochromis niloticus semaphorin-7A (LOC106096445), mRNA	1	12915	12915	exon-intron-exon-intron-exon-exon-intron-exon-intron-exon-intron-exon-intron-exon-intergenic-exon-intron-exon-intron-exon-intron-exon-intron-exon-intron-exon-intron-
NC_031965.2	32902047	32927331	gi|1468854042|ref|XM_026174434.1|	PREDICTED: Astatotilapia calliptera semaphorin-7A-like (LOC113026035), mRNA	1	25315	25315	exon-intron-exon-intron-exon-intron-exon-intron-exon-intron-exon-intron-exon-intron-exon-intergenic-exon-intron-exon-intron-exon-intron-exon-intron-exon-intron-exon-intron-exon-intron-exon-intron-exon-exon-intron-exon-intron-exon-intron-exon-intron-exon-intergenic-exon-intron-exon-intron-exon-intron-exon-intron-exon-intron-exon-intron-
NC_031965.2	30273814	30275692	gi|1434903228|ref|XM_003437534.5|	PREDICTED: Oreochromis niloticus matrix metallopeptidase 2 (mmp2), mRNA	1	1909	1909	exon-intron-exon-intron-exon-
NC_031965.2	28609178	28615589	gi|1434903121|ref|XM_013275277.3|	PREDICTED: Oreochromis niloticus unconventional myosin-Va (LOC100704034), transcript variant X7, mRNA	1	6442	6442	exon-intron-exon-intron-exon-intron-exon-intron-exon-intron-exon-intron-exon-
NC_031965.2	28586863	28589424	gi|1434903121|ref|XM_013275277.3|	PREDICTED: Oreochromis niloticus unconventional myosin-Va (LOC100704034), transcript variant X7, mRNA	1	2592	2592	exon-intron-exon-intron-exon-intron-exon-intron-exon-intron-exon-intron-exon-intron-exon-
NC_031965.2	25589509	25590146	gi|6942234|dbj|AB037866.1|	Tilapia mossambica mRNA for alpha-actin, complete cds	1	668	668	exon-intron-exon-
NC_031965.2	25589439	25590048	gi|157144150|dbj|AB360966.1|	Pagrus major ACTA1 gene for skeletal muscle alpha actin 1, complete cds	1	640	640	exon-intron-exon-
NC_031965.2	25588613	25591663	gi|319893875|gb|HM754623.1|	Rachycentron canadum alpha actin-3 gene, complete cds	1	3081	3081	exon-intron-exon-intron-exon-intron-exon-intron-exon-intron-exon-
NC_031965.2	25587905	25590172	gi|6942234|dbj|AB037866.1|	Tilapia mossambica mRNA for alpha-actin, complete cds	1	2298	2298	exon-intron-exon-intron-exon-intron-exon-intron-exon-
NC_031965.2	24489301	24489576	gi|1434902839|ref|XM_019359315.2|	PREDICTED: Oreochromis niloticus myomesin-2 (LOC100698303), mRNA	1	306	306	exon-
NC_031965.2	22739477	22740097	gi|1434902688|ref|XM_003442255.5|	PREDICTED: Oreochromis niloticus glutamic-oxaloacetic transaminase 2 (got2), mRNA	1	651	651	exon-
NC_031965.2	21099931	21100062	gi|1434902531|ref|XM_003442274.4|	PREDICTED: Oreochromis niloticus ribosomal protein L13 (rpl13), transcript variant X1, mRNA	1	162	162	exon-
NC_031965.2	20908311	20908470	gi|1434902507|ref|XM_013269709.3|	PREDICTED: Oreochromis niloticus microtubule associated monooxygenase, calponin and LIM domain containing 2 (mical2), transcript variant X7, mRNA	1	190	190	exon-
NC_031965.2	19591714	19619304	gi|55057670|emb|CR846705.1|	Takifugu rubripes DNA, highly conserved vertebrate non-coding sequence, element ID CNE601	1	27621	27621	exon-exon-exon-exon-intron-exon-intron-intron-
NC_031965.2	14691611	14694528	gi|927621733|gb|KT656911.1|	Telmatochromis sp. 'dhonti yellow' ultra conserved element locus uce-1072 genomic sequence	1	2948	2948	exon-exon-intron-exon-intron-exon-intron-exon-
NC_031965.2	13865382	13931992	gi|930755653|ref|XM_005938433.2|	PREDICTED: Haplochromis burtoni nuclear factor I/C (CCAAT-binding transcription factor) (nfic), transcript variant X2, mRNA	1	66641	66641	exon-intron-exon-intron-exon-intron-exon-intron-exon-intron-exon-intron-exon-intron-exon-intron-exon-intron-exon-intron-exon-exon-intron-exon-intron-exon-exon-intron-exon-intergenic-exon-intron-exon-intron-exon-exon-exon-intron-exon-intron-exon-intron-exon-intron-exon-intron-exon-intron-exon-intron-exon-intron-exon-intron-exon-intron-exon-intron-exon-intron-exon-intron-exon-intron-exon-intron-exo…
NC_031965.2	13748990	13749187	gi|583970104|ref|XM_006780430.1|	PREDICTED: Neolamprologus brichardi homer protein homolog 2-like (LOC102777771), transcript variant X1, mRNA	1	228	228	exon-intron-
NC_031965.2	12713041	12714978	gi|1434901874|ref|XM_005461585.4|	PREDICTED: Oreochromis niloticus fibrillin 1 (fbn1), mRNA	1	1968	1968	exon-intron-intron-exon-exon-
NC_031965.2	12598066	12599078	gi|1434901851|ref|XM_005461579.4|	PREDICTED: Oreochromis niloticus NAD(P) transhydrogenase, mitochondrial (LOC100699966), transcript variant X3, mRNA	1	1043	1043	exon-intron-exon-intron-exon-intron-exon-exon-
NC_031965.2	10928955	10929278	gi|1434901729|ref|XM_019354114.2|	PREDICTED: Oreochromis niloticus neogenin 1 (neo1), transcript variant X11, mRNA	1	354	354	exon-
NC_031965.2	1017807	1018564	gi|1434901065|ref|XM_019363023.2|	PREDICTED: Oreochromis niloticus zinc finger protein 408 (znf408), mRNA	1	786	786	exon-

## Sheet: ciri
Gene ID	Gene coordinates start	Gene coordinates end	Host gene for circRNAs ID	Host gene for circRNAs	Number of circRNAs	Minimum size, bp	Maximum size, bp	Structure
NW_020328527.1	17522	60094	gi|1434926443|ref|XM_025907575.1|	PREDICTED: Oreochromis niloticus syncytin-A-like (LOC112846998), mRNA	1	42600	42600	exon-intron-exon-intron-exon-intron-exon-intron-exon-intron-exon-intron-exon-intron-exon-intron-exon-intron-exon-intron-exon-intron-exon-intron-exon-intron-exon-intron-exon-exon-intron-exon-intron-exon-intron-exon-intron-exon-intron-exon-intron-exon-intron-exon-intergenic-
NW_020327774.1	57923	150727	gi|1434910647|ref|XM_025904709.1|	PREDICTED: Oreochromis niloticus protein NLRC3-like (LOC112845192), mRNA	1	92833	92833	exon-intron-exon-intron-exon-exon-intron-intron-exon-intron-exon-intron-exon-intergenic-exon-intron-exon-exon-intron-exon-exon-intron-exon-intergenic-exon-intron-intron-exon-intron-exon-intron-exon-intron-exon-intergenic-intergenic-intergenic-exon-intergenic-exon-intergenic-
NW_020327453.1	87498	93233	gi|1434918728|ref|XM_019358402.2|	PREDICTED: Oreochromis niloticus perforin-1 (LOC100692421), mRNA	1	5763	5763	exon-intron-exon-intron-exon-intergenic-exon-intron-exon-intron-exon-
NW_020327428.1	44481	44600	gi|1434897270|ref|XM_025904481.1|	PREDICTED: Oreochromis niloticus NLR family CARD domain-containing protein 3 (LOC102082989), partial mRNA	1	147	147	exon-
NW_020327419.1	193224	251970	gi|1434896954|ref|XM_019355002.2|	PREDICTED: Oreochromis niloticus contactin-4-like (LOC109199695), transcript variant X2, mRNA	1	58776	58776	exon-exon-intron-exon-intron-exon-intron-exon-intron-exon-intron-exon-exon-intron-exon-intron-exon-intergenic-exon-exon-intron-exon-intron-exon-intergenic-exon-intron-exon-intergenic-intergenic-intron-
NW_020327419.1	188463	362778	gi|1468883830|ref|XM_026143023.1|	PREDICTED: Astatotilapia calliptera zinc finger MYM-type protein 1-like (LOC113006830), mRNA	1	174345	174345	exon-intron-exon-exon-intron-exon-intron-exon-intron-exon-intron-exon-intron-exon-exon-intron-exon-intron-exon-intergenic-exon-exon-intron-exon-intron-exon-intergenic-exon-intron-exon-intron-exon-intron-exon-intron-exon-intergenic-intron-exon-intron-exon-intergenic-exon-intron-exon-intron-exon-exon-intergenic-exon-exon-intron-exon-intron-exon-exon-intron-exon-exon-intron-exon-intron-exon-intron-e…
NW_020327419.1	188463	339463	gi|1468883830|ref|XM_026143023.1|	PREDICTED: Astatotilapia calliptera zinc finger MYM-type protein 1-like (LOC113006830), mRNA	1	151030	151030	exon-intron-exon-exon-intron-exon-intron-exon-intron-exon-intron-exon-intron-exon-exon-intron-exon-intron-exon-intergenic-exon-exon-intron-exon-intron-exon-intergenic-exon-intron-exon-intron-exon-intron-exon-intron-exon-intergenic-intron-exon-intron-exon-intergenic-exon-intron-exon-intron-exon-exon-intergenic-exon-exon-intron-exon-intron-exon-exon-intron-exon-intergenic-intergenic-intron-intron-i…
NW_020327363.1	65973	66734	gi|1381413737|ref|XM_024800693.1|	PREDICTED: Maylandia zebra homeobox protein Hox-A3-like (LOC112431961), mRNA	1	789	789	exon-intron-exon-intron-exon-
NW_020327363.1	65973	112269	gi|1059791593|gb|AH013711.2|	Oreochromis niloticus KLR3 (KLR3) gene, exons 2 through 7; KLR2 pseudogene, partial sequence; KLR1 gene, complete sequence; KLR4 (KLR4) gene, exons 2 through 7; KLR5 (KLR5) gene, exons 1 through 7; KLR6 and KLR7 pseudogenes, complete sequence; KLR9 (KLR10) pseudogene, exons 4 through 7; KLR8 pseudogene, partial sequence; KLR9 (KLR9) gene, exons 1 through 7; C-type lectin (CLECT2)-like protein gen…	1	46325	46325	exon-intron-exon-intron-exon-intron-
NW_020327208.1	4034	17375	gi|1434985558|ref|XM_019349278.2|	PREDICTED: Oreochromis niloticus zinc finger protein 335 (LOC102082919), mRNA	1	13368	13368	exon-intron-exon-intron-exon-intron-exon-intron-exon-intron-exon-exon-intron-exon-intergenic-
NW_020327162.1	43392	78224	gi|1434896052|ref|XM_025904235.1|	PREDICTED: Oreochromis niloticus protein NYNRIN-like (LOC112844605), transcript variant X3, mRNA	1	34860	34860	exon-intron-exon-intron-exon-intron-exon-intron-exon-exon-intron-exon-intron-exon-intron-exon-exon-intron-exon-intergenic-exon-intron-exon-intron-exon-intron-exon-intron-exon-intron-exon-intron-exon-intron-exon-intron-exon-intron-exon-intron-exon-intron-exon-intron-exon-intron-exon-exon-intron-exon-exon-intergenic-exon-exon-
NW_020327153.1	281878	283889	gi|1434895983|ref|XM_019355471.2|	PREDICTED: Oreochromis niloticus NLR family CARD domain-containing protein 3 (LOC102082466), mRNA	1	2041	2041	exon-intron-exon-intergenic-
NW_020327144.1	88049	150005	gi|1434911195|ref|XM_025905277.1|	PREDICTED: Oreochromis niloticus protein NLRC3-like (LOC112846044), partial mRNA	1	61985	61985	exon-intron-exon-exon-intron-exon-exon-intergenic-intron-intergenic-
NW_020327098.1	221677	221850	gi|1110873283|ref|XM_019354857.1|	PREDICTED: Oreochromis niloticus protein NLRC3-like (LOC106097519), partial mRNA	1	203	203	intergenic-
NC_031987.2	7708398	7708532	gi|584018188|ref|XM_006803755.1|	PREDICTED: Neolamprologus brichardi E3 ubiquitin-protein ligase TRIM63-like (LOC102793986), mRNA	1	163	163	exon-
NC_031987.2	5202086	5203875	gi|1434973326|ref|XM_025903908.1|	PREDICTED: Oreochromis niloticus striated muscle preferentially expressed protein kinase (LOC100707609), transcript variant X5, mRNA	1	1818	1818	exon-intron-exon-intron-exon-intron-exon-
NC_031987.2	33884252	33884578	gi|1434972051|ref|XM_025903599.1|	PREDICTED: Oreochromis niloticus titin (LOC100702396), transcript variant X22, mRNA	1	357	357	exon-
NC_031987.2	30992411	31030129	gi|1434971881|ref|XM_019352949.2|	PREDICTED: Oreochromis niloticus amine oxidase [flavin-containing] (LOC100711847), mRNA	1	37749	37749	exon-intron-exon-intron-exon-intron-exon-exon-intron-exon-intron-exon-exon-intron-exon-intron-exon-intron-exon-intron-exon-intron-exon-intron-exon-intron-exon-intron-intergenic-
NC_031987.2	30946086	31029089	gi|1434971881|ref|XM_019352949.2|	PREDICTED: Oreochromis niloticus amine oxidase [flavin-containing] (LOC100711847), mRNA	1	83034	83034	exon-intron-exon-intron-exon-intron-exon-exon-intron-exon-intron-exon-exon-intron-exon-intron-exon-exon-intron-exon-intron-exon-intron-exon-intron-exon-intron-exon-intron-exon-intron-exon-intron-exon-intron-exon-intron-exon-intron-exon-exon-intron-exon-intron-exon-exon-intron-exon-intron-exon-intron-exon-intron-exon-intron-intron-intergenic-intron-intergenic-
NC_031987.2	30943443	30984022	gi|118495715|dbj|AB270897.1|	Oreochromis niloticus MHC class IA antigen UBA1, UBA2, UAA1 genes, partial cds, UAA3 and UAA2 pseudogenes, UAA4, UAA5 and UAA6 pseudogene fragments	1	40610	40610	exon-intron-exon-intron-exon-intron-exon-intron-exon-intron-exon-intron-exon-intron-exon-exon-intron-exon-intron-exon-exon-intron-exon-intron-exon-exon-intron-intron-intergenic-
NC_031987.2	27044232	27065475	gi|1434973801|ref|XM_025903966.1|	PREDICTED: Oreochromis niloticus interleukin-1 receptor type 2-like (LOC112844175), mRNA	1	21274	21274	exon-intron-exon-intron-exon-intergenic-exon-exon-exon-intron-exon-intron-exon-exon-intron-exon-intron-exon-intron-exon-intron-exon-intron-
NC_031987.2	26813873	26814386	gi|584008559|ref|XM_006799177.1|	PREDICTED: Neolamprologus brichardi nebulin-like (LOC102775746), mRNA	1	544	544	exon-intron-exon-
NC_031987.2	26813873	26813986	gi|584008559|ref|XM_006799177.1|	PREDICTED: Neolamprologus brichardi nebulin-like (LOC102775746), mRNA	1	144	144	exon-
NC_031987.2	26800611	26802199	gi|1434971483|ref|XM_025903481.1|	PREDICTED: Oreochromis niloticus nebulin (neb), transcript variant X9, mRNA	1	1619	1619	exon-intron-exon-
NC_031987.2	26797886	26797999	gi|1434971483|ref|XM_025903481.1|	PREDICTED: Oreochromis niloticus nebulin (neb), transcript variant X9, mRNA	1	144	144	exon-
NC_031987.2	26790151	26793919	gi|1434971483|ref|XM_025903481.1|	PREDICTED: Oreochromis niloticus nebulin (neb), transcript variant X9, mRNA	1	3799	3799	exon-intron-exon-intron-exon-intron-exon-intron-exon-intron-exon-intron-exon-intron-exon-intron-exon-intron-exon-intron-exon-intron-exon-
NC_031987.2	26779983	26781117	gi|1434971483|ref|XM_025903481.1|	PREDICTED: Oreochromis niloticus nebulin (neb), transcript variant X9, mRNA	1	1165	1165	exon-intron-exon-intron-exon-intron-exon-
NC_031987.2	24860784	25116134	gi|118495715|dbj|AB270897.1|	Oreochromis niloticus MHC class IA antigen UBA1, UBA2, UAA1 genes, partial cds, UAA3 and UAA2 pseudogenes, UAA4, UAA5 and UAA6 pseudogene fragments	1	255381	255381	exon-intron-exon-intergenic-exon-exon-intron-exon-exon-intron-exon-intron-exon-intron-exon-intron-exon-intron-exon-intron-exon-intron-exon-intron-exon-intron-exon-intron-exon-intron-exon-exon-intron-exon-intron-exon-intron-exon-exon-exon-intron-exon-exon-intron-exon-intron-exon-exon-exon-exon-intron-exon-exon-intron-exon-intron-exon-intron-exon-intron-exon-intergenic-exon-intron-exon-intron-exon-…
NC_031987.2	20729185	20729364	gi|1434972618|ref|XM_005457840.4|	PREDICTED: Oreochromis niloticus DDB1 and CUL4 associated factor 6 (dcaf6), transcript variant X9, mRNA	1	210	210	exon-
NC_031987.2	20723130	20727102	gi|1434972618|ref|XM_005457840.4|	PREDICTED: Oreochromis niloticus DDB1 and CUL4 associated factor 6 (dcaf6), transcript variant X9, mRNA	1	4003	4003	exon-exon-intron-exon-intron-exon-intron-exon-exon-exon-intron-
NC_031987.2	20516903	20523041	gi|548452160|ref|XM_005747161.1|	PREDICTED: Pundamilia nyererei phosphatidylinositol glycan anchor biosynthesis, class A (piga), mRNA	1	6169	6169	exon-intron-exon-intron-exon-intron-exon-intron-exon-
NC_031987.2	19359234	19546396	gi|1434972891|ref|XM_025903808.1|	PREDICTED: Oreochromis niloticus nectin-4 (LOC102079645), transcript variant X3, mRNA	1	187193	187193	exon-intron-exon-intron-exon-exon-intron-exon-intron-exon-exon-intron-exon-exon-intron-exon-intron-exon-intergenic-exon-exon-exon-intron-exon-intron-exon-intron-exon-intron-exon-exon-intron-exon-exon-intron-exon-intron-exon-intron-exon-exon-exon-exon-exon-exon-intron-exon-intron-exon-intron-exon-intron-exon-intron-exon-exon-exon-exon-exon-exon-exon-exon-intron-exon-intron-exon-intron-exon-intron-…
NC_031987.2	18891196	18970607	gi|1434974034|ref|XR_003216870.1|	PREDICTED: Oreochromis niloticus poliovirus receptor (LOC102079940), transcript variant X4, misc_RNA	1	79442	79442	exon-intron-exon-intron-exon-intron-exon-exon-intron-exon-exon-intron-exon-intron-exon-exon-intron-exon-intron-exon-intron-exon-intergenic-exon-intron-exon-intron-exon-exon-intron-exon-intron-exon-intron-exon-intron-exon-intron-exon-intron-exon-exon-intergenic-exon-intron-exon-intron-exon-intron-exon-exon-intron-exon-intron-intergenic-intron-
NC_031987.2	18871344	18872831	gi|1434974037|ref|XM_019352634.2|	PREDICTED: Oreochromis niloticus poliovirus receptor (LOC102080465), transcript variant X2, mRNA	1	1518	1518	exon-intron-exon-intron-exon-intron-exon-
NC_031987.2	16643630	16654910	gi|1434973233|ref|XM_019353199.2|	PREDICTED: Oreochromis niloticus integral membrane protein GPR155 (LOC102078181), mRNA	1	11311	11311	exon-intron-exon-intron-exon-intron-exon-intron-exon-intergenic-intergenic-exon-intron-exon-intron-exon-intron-exon-intron-exon-intron-exon-intron-exon-intron-exon-intron-exon-exon-
NC_031987.2	16640217	16651034	gi|1434973233|ref|XM_019353199.2|	PREDICTED: Oreochromis niloticus integral membrane protein GPR155 (LOC102078181), mRNA	1	10848	10848	exon-intron-exon-intron-exon-intron-exon-intron-exon-intron-exon-intron-exon-intron-exon-intron-exon-intron-exon-intron-exon-intergenic-intergenic-exon-intron-exon-exon-
NC_031987.2	14172984	14181466	gi|1434974706|ref|XM_025904102.1|	PREDICTED: Oreochromis niloticus LINE-1 retrotransposable element ORF2 protein (LOC102079249), transcript variant X5, mRNA	1	8513	8513	exon-exon-exon-exon-intron-exon-intron-exon-intron-exon-intron-exon-intron-exon-intron-exon-intron-exon-intron-exon-exon-intron-exon-
NC_031987.2	14170035	14176232	gi|1434974706|ref|XM_025904102.1|	PREDICTED: Oreochromis niloticus LINE-1 retrotransposable element ORF2 protein (LOC102079249), transcript variant X5, mRNA	1	6228	6228	exon-intron-exon-intron-exon-exon-exon-intron-exon-exon-exon-exon-exon-intron-exon-intron-exon-intron-exon-intron-exon-intron-exon-intron-
NC_031987.2	13974159	13980201	gi|1434974922|ref|XM_025904147.1|	PREDICTED: Oreochromis niloticus CASP8 and FADD-like apoptosis regulator (LOC100712109), transcript variant X2, mRNA	1	6073	6073	exon-intron-exon-intron-exon-intron-exon-exon-intron-exon-intron-exon-intron-exon-exon-intron-exon-intron-exon-intergenic-
NC_031987.2	13528997	13529615	gi|930730534|ref|XM_005918349.2|	PREDICTED: Haplochromis burtoni desmin-like (LOC102299224), mRNA	1	649	649	exon-intron-exon-
NC_031987.2	13480861	13485440	gi|1434974525|ref|XM_019353232.2|	PREDICTED: Oreochromis niloticus tubulin alpha-1A chain (LOC100708257), mRNA	1	4610	4610	exon-intron-exon-intergenic-exon-exon-exon-exon-intron-exon-intron-
NC_031987.2	1205680	1259173	gi|1468920037|ref|XM_026159709.1|	PREDICTED: Astatotilapia calliptera zinc finger MYM-type protein 1-like (LOC113016689), mRNA	1	53522	53522	exon-intron-exon-intron-exon-exon-intron-exon-intron-exon-intron-exon-intron-exon-exon-intron-exon-exon-intron-exon-intron-exon-exon-intron-exon-intron-exon-intron-exon-exon-intron-exon-intron-intron-intron-
NC_031987.2	11360713	11362298	gi|923858586|ref|XM_005747828.2|	PREDICTED: Pundamilia nyererei tumor protein, translationally-controlled 1 (tpt1), mRNA	1	1616	1616	exon-intron-exon-
NC_031987.2	10354087	10363874	gi|118495715|dbj|AB270897.1|	Oreochromis niloticus MHC class IA antigen UBA1, UBA2, UAA1 genes, partial cds, UAA3 and UAA2 pseudogenes, UAA4, UAA5 and UAA6 pseudogene fragments	1	9818	9818	exon-intron-exon-exon-intron-exon-intron-exon-intron-exon-intron-
NC_031986.2	45468002	45472582	gi|930757145|ref|XM_005939475.2|	PREDICTED: Haplochromis burtoni telomere maintenance 2 (telo2), mRNA	1	4611	4611	exon-intron-exon-intron-exon-intron-exon-
NC_031986.2	45119249	45119970	gi|1434996481|ref|XM_013268343.3|	PREDICTED: Oreochromis niloticus nexilin F-actin binding protein (nexn), transcript variant X3, mRNA	1	752	752	exon-intron-exon-
NC_031986.2	45040074	45040590	gi|1434995333|ref|XM_019351898.2|	PREDICTED: Oreochromis niloticus obscurin (LOC100700801), mRNA	1	547	547	exon-intron-exon-intron-exon-
NC_031986.2	43161071	43198150	gi|1434974310|ref|XM_019353411.2|	PREDICTED: Oreochromis niloticus interferon gamma receptor 2-2 (ifngr2-2), mRNA	1	37110	37110	exon-intron-exon-intron-exon-intron-exon-intron-exon-intron-exon-intron-exon-intron-exon-intron-exon-intron-exon-intron-exon-intergenic-exon-exon-exon-exon-intron-exon-intron-exon-intron-exon-intron-exon-intron-exon-intron-exon-intron-exon-intron-intron-exon-intron-exon-intron-exon-intron-exon-intron-exon-exon-intron-exon-intron-exon-exon-intron-exon-intron-exon-intron-exon-intron-exon-intron-int…
NC_031986.2	42808835	42829955	gi|927599563|gb|KT634745.1|	Neolamprologus pulcher voucher Matthew D. McGee:4405 ultra conserved element locus uce-375 genomic sequence	1	21151	21151	intron-exon-intron-exon-intron-exon-intron-exon-intron-exon-intron-intron-exon-intron-intron-exon-intron-exon-exon-exon-
NC_031986.2	42443745	42447945	gi|1434994096|ref|XM_005479056.4|	PREDICTED: Oreochromis niloticus SH2 domain-containing adapter protein D (LOC100709134), transcript variant X4, mRNA	1	4231	4231	exon-intron-exon-
NC_031986.2	3950837	3954216	gi|1434993584|ref|XM_025902687.1|	PREDICTED: Oreochromis niloticus dystrophin (LOC100694991), transcript variant X4, mRNA	1	3408	3408	exon-intron-exon-
NC_031986.2	39388380	39393427	gi|1434996238|ref|XM_019351325.2|	PREDICTED: Oreochromis niloticus cytochrome P450 2J2 (LOC100702332), transcript variant X2, mRNA	1	5078	5078	exon-intron-exon-intergenic-exon-intron-exon-intron-exon-intron-exon-intron-exon-intron-exon-intron-exon-
NC_031986.2	38822449	38828184	gi|1434995487|ref|XM_019351575.2|	PREDICTED: Oreochromis niloticus dimethylaniline monooxygenase [N-oxide-forming] 5 (LOC102080748), mRNA	1	5766	5766	exon-intron-exon-exon-intergenic-exon-intron-exon-intron-exon-intron-exon-intron-exon-intron-exon-intron-exon-intron-exon-
NC_031986.2	38821346	38827222	gi|1434995487|ref|XM_019351575.2|	PREDICTED: Oreochromis niloticus dimethylaniline monooxygenase [N-oxide-forming] 5 (LOC102080748), mRNA	1	5907	5907	exon-intron-exon-intron-exon-intron-exon-exon-intergenic-exon-intron-exon-intron-exon-intron-exon-intron-exon-intron-exon-
NC_031986.2	3872741	3886611	gi|1434909132|ref|XR_002058664.2|	PREDICTED: Oreochromis niloticus polymeric immunoglobulin receptor (LOC102079294), transcript variant X10, misc_RNA	1	13899	13899	exon-intron-exon-exon-intron-
NC_031986.2	35942086	35948290	gi|1434993362|ref|XM_003451333.4|	PREDICTED: Oreochromis niloticus dihydrolipoamide branched chain transacylase E2 (dbt), mRNA	1	6235	6235	exon-intron-exon-intron-exon-intron-exon-intron-exon-intron-exon-intron-exon-intron-exon-intron-exon-intron-intergenic-exon-exon-exon-
NC_031986.2	30905930	30927307	gi|1434995688|ref|XM_003444300.5|	PREDICTED: Oreochromis niloticus transmembrane and coiled-coil domains 1 (tmco1), mRNA	1	21408	21408	exon-intron-exon-intron-exon-intergenic-exon-exon-intron-exon-intron-exon-intron-exon-intron-exon-intron-exon-intron-exon-intron-exon-intron-exon-intron-exon-intron-exon-intron-exon-exon-intron-exon-intron-exon-intron-exon-intron-exon-intron-exon-intron-exon-intron-exon-intron-exon-intron-exon-intron-exon-intron-exon-intergenic-exon-intron-exon-intron-exon-intergenic-
NC_031986.2	29193264	29256360	gi|1434994618|ref|XM_019351601.2|	PREDICTED: Oreochromis niloticus zinc finger BED domain-containing protein 1-like (LOC109196945), mRNA	1	63127	63127	exon-intron-exon-intron-exon-exon-intron-exon-intron-exon-intron-exon-intron-exon-intron-exon-exon-intron-exon-exon-exon-intron-exon-intron-exon-intron-exon-intron-exon-intron-exon-exon-intron-exon-intergenic-exon-intron-exon-intron-intron-intergenic-intron-
NC_031986.2	29175728	29256743	gi|1434994634|ref|XM_025902899.1|	PREDICTED: Oreochromis niloticus tumor necrosis factor receptor superfamily member 14 (LOC100703972), transcript variant X6, mRNA	1	81046	81046	exon-intron-exon-intron-exon-intron-exon-intron-exon-exon-intron-intron-exon-exon-exon-exon-intergenic-exon-intron-exon-intron-exon-intron-exon-intron-exon-intron-exon-intron-exon-intron-exon-intron-exon-intron-exon-intron-exon-exon-exon-exon-intron-exon-intergenic-exon-intron-exon-intron-exon-intron-exon-intron-exon-exon-intron-exon-intron-exon-intron-exon-intron-exon-intron-exon-exon-intron-exo…
NC_031986.2	26663093	26729656	gi|118495715|dbj|AB270897.1|	Oreochromis niloticus MHC class IA antigen UBA1, UBA2, UAA1 genes, partial cds, UAA3 and UAA2 pseudogenes, UAA4, UAA5 and UAA6 pseudogene fragments	1	66594	66594	exon-intron-exon-intron-exon-exon-exon-intron-exon-intron-intron-exon-intron-exon-intron-exon-exon-exon-intron-exon-exon-intron-exon-exon-exon-exon-exon-exon-exon-exon-exon-intron-exon-intron-exon-exon-exon-exon-exon-exon-exon-intron-exon-exon-exon-intron-exon-exon-exon-intron-exon-intron-exon-intron-exon-intron-exon-intron-exon-intron-exon-intron-exon-intron-exon-intron-exon-exon-intron-intron-
NC_031986.2	2525332	2526568	gi|1434995047|ref|XM_025902986.1|	PREDICTED: Oreochromis niloticus dystrophin (LOC100700501), transcript variant X6, mRNA	1	1265	1265	exon-intron-exon-exon-
NC_031986.2	25058046	25391538	gi|1110928047|ref|XM_019351446.1|	PREDICTED: Oreochromis niloticus NLR family CARD domain-containing protein 3 (LOC100707312), mRNA	1	333523	333523	exon-intron-exon-intron-exon-exon-intron-exon-exon-exon-intron-exon-exon-exon-intron-exon-intron-exon-intron-exon-exon-intron-exon-intron-exon-intron-exon-exon-intron-exon-intron-exon-exon-intron-exon-exon-exon-intron-exon-intron-exon-intron-exon-intron-exon-intron-exon-intron-exon-exon-intron-exon-intron-exon-intron-exon-intron-exon-intron-exon-intron-exon-intron-exon-exon-intron-exon-intron-exo…
NC_031986.2	25044121	25066878	gi|1434993834|ref|XM_025902729.1|	PREDICTED: Oreochromis niloticus NACHT, LRR and PYD domains-containing protein 12-like (LOC109196903), transcript variant X2, mRNA	1	22788	22788	intron-exon-exon-exon-intron-exon-exon-exon-exon-intron-exon-intron-exon-intron-exon-exon-exon-exon-exon-exon-intron-exon-intron-exon-intron-exon-exon-intron-intron-
NC_031986.2	25020546	25065207	gi|1434993834|ref|XM_025902729.1|	PREDICTED: Oreochromis niloticus NACHT, LRR and PYD domains-containing protein 12-like (LOC109196903), transcript variant X2, mRNA	1	44692	44692	exon-intron-exon-intron-exon-exon-intron-exon-exon-intron-exon-intron-exon-intron-exon-exon-exon-intron-exon-exon-exon-exon-intron-exon-intron-exon-intron-exon-exon-exon-exon-exon-exon-intron-exon-intron-exon-intron-exon-exon-intron-intron-intron-intron-
NC_031986.2	23790852	23896193	gi|1434996311|ref|XM_019351511.2|	PREDICTED: Oreochromis niloticus DNA repair protein RAD50 (LOC100691162), transcript variant X4, mRNA	1	105372	105372	exon-intron-exon-intron-exon-exon-exon-exon-exon-intron-exon-intron-exon-intron-exon-exon-intron-exon-intron-exon-intron-exon-exon-intron-exon-intron-exon-exon-exon-intron-exon-exon-intron-exon-intron-exon-exon-exon-intron-exon-intron-exon-exon-intron-exon-exon-intron-exon-intron-exon-intron-exon-intron-exon-intron-exon-intron-exon-intron-exon-intron-exon-intron-exon-intron-exon-intron-exon-intro…
NC_031986.2	21701464	21703684	gi|554818931|ref|XM_005920160.1|	PREDICTED: Haplochromis burtoni transmembrane protein 182-like (LOC102310208), mRNA	1	2251	2251	exon-intron-exon-
NC_031986.2	17841494	17944388	gi|1434996577|ref|XM_003446594.5|	PREDICTED: Oreochromis niloticus GTPase IMAP family member 8 (LOC100711929), partial mRNA	1	102925	102925	exon-exon-intron-exon-intergenic-intron-exon-intron-exon-intron-exon-exon-intron-exon-exon-intron-exon-intron-exon-intron-exon-intron-exon-exon-exon-exon-intergenic-exon-intron-exon-intron-exon-intron-exon-intron-exon-intron-exon-exon-intron-exon-intron-exon-intron-exon-intron-exon-intron-exon-intron-exon-intron-exon-intron-exon-intron-exon-intron-exon-intron-exon-intron-exon-intron-exon-intron-e…
NC_031986.2	17834640	17937297	gi|1434996577|ref|XM_003446594.5|	PREDICTED: Oreochromis niloticus GTPase IMAP family member 8 (LOC100711929), partial mRNA	1	102688	102688	exon-intron-exon-intron-exon-intron-exon-intron-exon-intron-exon-intron-exon-intron-exon-intron-exon-intron-exon-intron-exon-intron-exon-intron-exon-intron-exon-intron-exon-intron-exon-intron-exon-intron-exon-intron-exon-intron-exon-intron-exon-exon-exon-exon-intron-exon-exon-intron-exon-intergenic-intron-exon-intron-exon-intron-exon-exon-intron-exon-exon-intron-exon-intron-exon-intron-exon-intro…
NC_031986.2	17688	43760	gi|1434974018|ref|XM_019352622.2|	PREDICTED: Oreochromis niloticus nectin-3 (LOC102080174), transcript variant X1, mRNA	1	26097	26097	exon-intron-exon-exon-intron-exon-intron-
NC_031986.2	12405525	12550513	gi|1434909766|ref|XR_003216476.1|	PREDICTED: Oreochromis niloticus retrovirus-related Pol polyprotein from transposon 412 (LOC102082344), transcript variant X2, misc_RNA	1	145019	145019	exon-intron-exon-intron-exon-intron-exon-exon-intron-exon-intron-exon-intron-exon-intron-exon-intron-exon-intron-exon-intron-exon-exon-intron-exon-exon-intron-exon-intron-exon-intron-exon-intron-exon-intron-exon-intron-exon-intron-exon-intron-exon-intron-exon-intron-exon-exon-intron-exon-intron-exon-intron-exon-intron-exon-intron-exon-intron-exon-exon-intron-exon-exon-exon-exon-intron-exon-interg…
NC_031986.2	11263255	11266860	gi|1434993398|ref|XM_005450058.4|	PREDICTED: Oreochromis niloticus muscleblind-like protein 2a (LOC100695201), transcript variant X15, mRNA	1	3636	3636	exon-intron-exon-exon-intron-exon-
NC_031985.2	8555356	8609228	gi|1434992357|ref|XM_025902454.1|	PREDICTED: Oreochromis niloticus major histocompatibility complex class I-related gene protein-like (LOC112841703), transcript variant X2, mRNA	1	53901	53901	exon-intron-exon-intron-exon-intron-exon-intron-exon-intron-exon-intron-exon-intron-exon-exon-exon-intron-exon-intron-exon-intron-exon-intron-exon-intron-exon-exon-intron-exon-exon-intron-exon-intron-exon-intron-exon-intron-exon-exon-intron-exon-intron-exon-intron-exon-intergenic-intron-intron-
NC_031985.2	8555356	8583575	gi|1434992964|ref|XM_019355577.2|	PREDICTED: Oreochromis niloticus class I histocompatibility antigen, F10 alpha chain (LOC100702327), mRNA	1	28248	28248	exon-intron-exon-intron-exon-intron-exon-intron-exon-intron-exon-intron-exon-intron-exon-exon-exon-intron-exon-intron-exon-intron-exon-intron-exon-intergenic-
NC_031985.2	38800780	38823274	gi|1434989954|ref|XM_019350764.2|	PREDICTED: Oreochromis niloticus ubiquitin-conjugating enzyme E2 E2 (LOC100697459), mRNA	1	22525	22525	exon-intron-exon-intergenic-exon-exon-exon-intron-exon-intron-exon-exon-intron-
NC_031985.2	3767942	3936935	gi|118495715|dbj|AB270897.1|	Oreochromis niloticus MHC class IA antigen UBA1, UBA2, UAA1 genes, partial cds, UAA3 and UAA2 pseudogenes, UAA4, UAA5 and UAA6 pseudogene fragments	1	169022	169022	exon-exon-exon-intron-exon-intron-exon-intron-exon-intron-exon-intron-exon-intron-exon-exon-intron-exon-exon-exon-exon-intron-exon-intron-exon-intron-exon-intron-exon-intron-exon-intron-exon-intron-intron-exon-intron-exon-intron-exon-intron-exon-intron-exon-intron-exon-intron-intron-intron-intron-intron-intron-exon-
NC_031985.2	27837715	27859323	gi|1434991880|ref|XM_019350598.2|	PREDICTED: Oreochromis niloticus glutathione S-transferase A (LOC102075633), mRNA	1	21639	21639	exon-exon-exon-intergenic-exon-intron-exon-intron-exon-intron-exon-intron-exon-intron-exon-exon-intron-exon-intron-exon-intron-exon-intron-exon-intergenic-
NC_031985.2	24429461	24430494	gi|930743217|ref|XM_014335585.1|	PREDICTED: Haplochromis burtoni collagen, type I, alpha 2 (col1a2), transcript variant X2, mRNA	1	1064	1064	exon-intron-exon-intron-exon-
NC_031985.2	24429255	24429514	gi|544583476|ref|NM_001282897.1|	Oreochromis niloticus collagen type I alpha 2 chain (col1a2), mRNA	1	290	290	exon-intron-exon-
NC_031985.2	24428856	24428954	gi|544583476|ref|NM_001282897.1|	Oreochromis niloticus collagen type I alpha 2 chain (col1a2), mRNA	1	129	129	exon-
NC_031985.2	23901713	23902275	gi|930743201|ref|XM_014335584.1|	PREDICTED: Haplochromis burtoni sorting nexin 13 (snx13), transcript variant X2, mRNA	1	593	593	exon-intron-exon-intron-exon-
NC_031985.2	2280030	2290744	gi|1434992737|ref|XM_013266399.3|	PREDICTED: Oreochromis niloticus ring finger protein 139 (rnf139), mRNA	1	10743	10743	exon-exon-exon-exon-intron-exon-intron-exon-intron-exon-intron-exon-exon-intron-exon-intron-exon-intron-exon-intron-exon-exon-intron-exon-exon-intron-exon-intron-exon-exon-intron-exon-intergenic-exon-intron-exon-intron-exon-intron-exon-intron-exon-intron-exon-
NC_031985.2	13820232	13830767	gi|1434991051|ref|XM_019350575.2|	PREDICTED: Oreochromis niloticus MAP7 domain-containing protein 1 (LOC100702993), transcript variant X10, mRNA	1	10566	10566	exon-intron-exon-intron-exon-intron-exon-exon-intron-
NC_031984.2	4519550	4524223	gi|1434989026|ref|XM_019349722.2|	PREDICTED: Oreochromis niloticus sodium- and chloride-dependent creatine transporter 1 (LOC100704248), transcript variant X3, mRNA	1	4702	4702	exon-exon-intron-exon-intron-
NC_031984.2	35582665	35589644	gi|1059791593|gb|AH013711.2|	Oreochromis niloticus KLR3 (KLR3) gene, exons 2 through 7; KLR2 pseudogene, partial sequence; KLR1 gene, complete sequence; KLR4 (KLR4) gene, exons 2 through 7; KLR5 (KLR5) gene, exons 1 through 7; KLR6 and KLR7 pseudogenes, complete sequence; KLR9 (KLR10) pseudogene, exons 4 through 7; KLR8 pseudogene, partial sequence; KLR9 (KLR9) gene, exons 1 through 7; C-type lectin (CLECT2)-like protein gen…	1	7010	7010	exon-exon-intron-exon-intron-
NC_031984.2	23857803	23879618	gi|118495715|dbj|AB270897.1|	Oreochromis niloticus MHC class IA antigen UBA1, UBA2, UAA1 genes, partial cds, UAA3 and UAA2 pseudogenes, UAA4, UAA5 and UAA6 pseudogene fragments	1	21846	21846	intron-exon-intron-exon-exon-intron-exon-intron-exon-intron-exon-exon-intron-exon-intron-exon-intron-exon-intron-exon-exon-exon-exon-intron-exon-intergenic-exon-intron-
NC_031984.2	23834008	23835346	gi|1434988642|ref|XM_013271151.3|	PREDICTED: Oreochromis niloticus PR/SET domain 16 (prdm16), mRNA	1	1369	1369	exon-intron-exon-intron-exon-intron-exon-
NC_031984.2	22067641	22068248	gi|1434988765|ref|XM_003444805.5|	PREDICTED: Oreochromis niloticus calsyntenin 1 (clstn1), transcript variant X4, mRNA	1	638	638	exon-intron-exon-
NC_031984.2	20727900	20728238	gi|1434988337|ref|XM_025901840.1|	PREDICTED: Oreochromis niloticus ribosomal protein L10a (rpl10a), transcript variant X2, mRNA	1	369	369	exon-intron-exon-
NC_031984.2	18676088	18678947	gi|1434986338|ref|XM_019349598.2|	PREDICTED: Oreochromis niloticus hemicentin-1 (LOC100712379), mRNA	1	2890	2890	exon-intron-exon-intron-exon-intron-intron-exon-intron-exon-exon-
NC_031984.2	15224199	15225087	gi|1434987775|ref|XM_025901766.1|	PREDICTED: Oreochromis niloticus glutamate receptor-interacting protein 2 (LOC100699182), transcript variant X7, mRNA	1	919	919	exon-exon-intron-exon-
NC_031984.2	1245238	1246912	gi|1434987899|ref|XM_003446028.5|	PREDICTED: Oreochromis niloticus acyl-CoA synthetase short chain family member 2 (acss2), transcript variant X3, mRNA	1	1703	1703	exon-intron-exon-intron-exon-exon-
NC_031983.2	8430068	8438815	gi|1381431089|ref|XM_012918517.3|	PREDICTED: Maylandia zebra sodium- and chloride-dependent GABA transporter 2 (LOC101476219), transcript variant X2, mRNA	1	8776	8776	exon-intron-exon-intron-exon-intergenic-exon-intron-exon-intron-exon-exon-intergenic-exon-intron-
NC_031983.2	6588902	6599175	gi|118495715|dbj|AB270897.1|	Oreochromis niloticus MHC class IA antigen UBA1, UBA2, UAA1 genes, partial cds, UAA3 and UAA2 pseudogenes, UAA4, UAA5 and UAA6 pseudogene fragments	1	10302	10302	exon-intron-exon-exon-exon-intron-exon-intron-exon-intron-exon-intron-exon-intron-exon-intron-exon-intron-exon-intron-exon-intron-exon-intron-exon-intron-exon-
NC_031983.2	6557440	6607897	gi|118495715|dbj|AB270897.1|	Oreochromis niloticus MHC class IA antigen UBA1, UBA2, UAA1 genes, partial cds, UAA3 and UAA2 pseudogenes, UAA4, UAA5 and UAA6 pseudogene fragments	1	50486	50486	exon-intron-exon-intron-exon-intron-exon-intron-exon-intron-exon-intron-exon-intron-exon-intergenic-exon-intron-exon-exon-intron-exon-intron-exon-intron-exon-intron-exon-intron-exon-intron-exon-intron-exon-intron-exon-intron-exon-intron-exon-intron-exon-intergenic-exon-exon-intron-exon-intron-exon-intron-exon-intron-exon-intron-exon-intron-exon-intron-exon-intron-exon-intron-exon-intron-exon-exon…
NC_031983.2	6557440	6581338	gi|1434984103|ref|XM_025900987.1|	PREDICTED: Oreochromis niloticus tumor necrosis factor alpha-induced protein 2 (LOC100693880), transcript variant X2, mRNA	1	23927	23927	exon-intron-exon-intron-exon-intron-exon-intron-exon-intron-exon-intron-exon-intron-exon-intergenic-exon-intron-exon-exon-intron-exon-intron-exon-intron-exon-intron-exon-intron-exon-intron-exon-intron-exon-intron-exon-intron-exon-intron-exon-intron-exon-intergenic-exon-exon-intron-exon-intron-exon-intron-exon-intron-exon-intron-exon-intron-
NC_031983.2	6295906	6318502	gi|1434982626|ref|XM_003447793.5|	PREDICTED: Oreochromis niloticus zinc finger FYVE-type containing 21 (zfyve21), transcript variant X1, mRNA	1	22625	22625	exon-intron-exon-exon-intergenic-exon-intron-exon-intron-exon-intron-exon-intron-exon-intron-intron-exon-intergenic-exon-
NC_031983.2	563858	565098	gi|1434983736|ref|XM_019348596.2|	PREDICTED: Oreochromis niloticus galactocerebrosidase (LOC100707150), mRNA	1	1267	1267	exon-intron-exon-intron-exon-intron-exon-
NC_031983.2	30813628	30814989	gi|1434942737|ref|XM_003444416.5|	PREDICTED: Oreochromis niloticus sarcosine dehydrogenase (sardh), transcript variant X2, mRNA	1	1392	1392	exon-intron-exon-intron-exon-intron-exon-intron-exon-
NC_031983.2	22346989	22348856	gi|1434985360|ref|XM_005477470.4|	PREDICTED: Oreochromis niloticus solute carrier family 8 member A3 (slc8a3), transcript variant X3, mRNA	1	1898	1898	exon-exon-
NC_031983.2	18390651	18397842	gi|1434985297|ref|XM_025901221.1|	PREDICTED: Oreochromis niloticus lysosome membrane protein 2 (LOC100694672), transcript variant X5, mRNA	1	7222	7222	exon-intron-exon-intron-exon-intron-exon-intron-exon-intron-exon-intron-exon-intron-exon-intron-exon-intron-exon-intron-exon-intron-exon-
NC_031983.2	17043245	17043933	gi|1434984981|ref|XM_025901155.1|	PREDICTED: Oreochromis niloticus trichohyalin (LOC100709148), mRNA	1	719	719	exon-intron-exon-intron-exon-intron-exon-
NC_031983.2	17041201	17046105	gi|1434969166|ref|XM_019346046.2|	PREDICTED: Oreochromis niloticus fibrinogen-binding protein (LOC109194861), transcript variant X5, mRNA	1	4935	4935	exon-intron-exon-intron-exon-intron-exon-intron-exon-intron-exon-intron-exon-intron-exon-intron-exon-intron-exon-intron-exon-intron-exon-intron-exon-intron-exon-intron-exon-intron-exon-intron-exon-intron-exon-intron-exon-
NC_031983.2	17040928	17046105	gi|1434969166|ref|XM_019346046.2|	PREDICTED: Oreochromis niloticus fibrinogen-binding protein (LOC109194861), transcript variant X5, mRNA	1	5208	5208	exon-intron-exon-intron-exon-intron-exon-intron-exon-intron-exon-intron-exon-intron-exon-intron-exon-intron-exon-intron-exon-intron-exon-intron-exon-intron-exon-intron-exon-intron-exon-intron-exon-intron-exon-intron-exon-intron-exon-
NC_031983.2	12379114	12396590	gi|1434983526|ref|XM_025900886.1|	PREDICTED: Oreochromis niloticus isoamyl acetate-hydrolyzing esterase 1 homolog (LOC109195997), mRNA	1	17507	17507	exon-intron-exon-exon-intron-exon-intron-exon-intron-exon-exon-intron-exon-intron-exon-intron-
NC_031983.2	10545664	10567168	gi|1434984458|ref|XM_005476934.4|	PREDICTED: Oreochromis niloticus CD209 antigen-like protein E (LOC102082687), mRNA	1	21535	21535	exon-intron-exon-intron-exon-intergenic-exon-intron-exon-intron-exon-intron-exon-intron-exon-exon-intron-exon-intron-exon-intron-exon-intron-exon-intron-exon-intron-exon-intergenic-exon-intron-exon-intron-exon-intron-exon-intron-exon-intron-exon-intergenic-exon-intron-exon-intron-exon-intron-exon-intron-exon-intergenic-
NC_031982.2	9953969	9954142	gi|1434978893|ref|XM_003437808.5|	PREDICTED: Oreochromis niloticus profilin-2 (LOC100707144), transcript variant X2, mRNA	1	202	202	exon-
NC_031982.2	8632139	8642813	gi|1434982073|ref|XM_019347438.2|	PREDICTED: Oreochromis niloticus transferrin receptor protein 1 (LOC102081239), mRNA	1	10703	10703	exon-intron-exon-intron-exon-intron-exon-exon-exon-exon-intron-exon-intron-exon-intron-exon-intron-exon-intron-exon-intron-exon-intron-exon-intron-exon-intron-exon-intron-exon-intron-exon-intron-intron-
NC_031982.2	8623391	8642813	gi|1434982073|ref|XM_019347438.2|	PREDICTED: Oreochromis niloticus transferrin receptor protein 1 (LOC102081239), mRNA	1	19451	19451	exon-intron-exon-intron-exon-intron-exon-intron-exon-intron-exon-intergenic-exon-intron-exon-intron-exon-intron-exon-intron-exon-intron-exon-intron-exon-intron-exon-intron-exon-intron-exon-intron-exon-intron-exon-intron-exon-intron-exon-intron-exon-intron-exon-exon-exon-exon-intron-exon-intron-exon-intron-exon-intron-exon-intron-exon-intron-exon-intron-exon-intron-exon-intron-exon-intron-exon-int…
NC_031982.2	7002948	7009217	gi|1434981486|ref|XM_019347885.2|	PREDICTED: Oreochromis niloticus golgin subfamily A member 4 (LOC100695437), transcript variant X2, mRNA	1	6298	6298	exon-intron-exon-intron-exon-intron-exon-intron-exon-intron-exon-intron-exon-intron-exon-intron-exon-intron-exon-intron-exon-intron-exon-intron-exon-intron-exon-intron-exon-intron-exon-intron-exon-intron-exon-intron-exon-intron-exon-intron-exon-intron-exon-
NC_031982.2	4535430	4539958	gi|1434981297|ref|XM_005464528.3|	PREDICTED: Oreochromis niloticus DEP domain containing 5 (depdc5), transcript variant X15, mRNA	1	4557	4557	exon-intron-exon-intron-exon-intron-exon-intron-exon-exon-intron-exon-intron-exon-intron-exon-intron-exon-exon-intron-
NC_031982.2	4477984	4478859	gi|1434981494|ref|XM_005464533.4|	PREDICTED: Oreochromis niloticus mitochondrial ribosomal protein L37 (mrpl37), transcript variant X2, mRNA	1	904	904	exon-intron-exon-intron-exon-intron-exon-
NC_031982.2	32012492	32161007	gi|118495715|dbj|AB270897.1|	Oreochromis niloticus MHC class IA antigen UBA1, UBA2, UAA1 genes, partial cds, UAA3 and UAA2 pseudogenes, UAA4, UAA5 and UAA6 pseudogene fragments	1	148546	148546	exon-intron-intron-exon-intron-exon-intron-exon-intron-exon-exon-intron-exon-intron-exon-exon-intron-exon-exon-exon-intron-exon-intron-exon-intron-exon-intron-exon-exon-intron-exon-intron-exon-intron-exon-intron-exon-exon-intron-exon-intron-exon-intron-exon-intron-exon-intron-exon-intron-exon-intron-exon-intron-intron-exon-intron-exon-intron-exon-intron-exon-intron-exon-intron-exon-intron-exon-in…
NC_031982.2	30310544	30508352	gi|1059791593|gb|AH013711.2|	Oreochromis niloticus KLR3 (KLR3) gene, exons 2 through 7; KLR2 pseudogene, partial sequence; KLR1 gene, complete sequence; KLR4 (KLR4) gene, exons 2 through 7; KLR5 (KLR5) gene, exons 1 through 7; KLR6 and KLR7 pseudogenes, complete sequence; KLR9 (KLR10) pseudogene, exons 4 through 7; KLR8 pseudogene, partial sequence; KLR9 (KLR9) gene, exons 1 through 7; C-type lectin (CLECT2)-like protein gen…	1	197839	197839	exon-exon-exon-exon-intergenic-exon-intron-exon-exon-intron-exon-intergenic-exon-intron-exon-intron-exon-exon-exon-exon-intron-exon-intergenic-exon-intron-exon-intron-exon-exon-intron-exon-intergenic-exon-intron-exon-intron-exon-intron-exon-intergenic-exon-intron-exon-exon-intron-exon-exon-exon-exon-intergenic-exon-intron-exon-intron-exon-intron-exon-intron-exon-intron-exon-intron-exon-intron-exo…
NC_031982.2	27199427	27203702	gi|1434978853|ref|XM_019348045.2|	PREDICTED: Oreochromis niloticus supervillin (LOC100703985), transcript variant X13, mRNA	1	4306	4306	exon-intron-exon-intron-exon-intron-exon-intron-exon-intron-exon-intron-exon-
NC_031982.2	25980059	26026998	gi|1381384467|ref|XM_012920245.3|	PREDICTED: Maylandia zebra microtubule-associated protein futsch (LOC101470030), transcript variant X6, mRNA	1	46970	46970	exon-intron-exon-intron-exon-intron-exon-intron-exon-intron-exon-intron-exon-intron-exon-intron-exon-intron-exon-intron-exon-intron-exon-intron-exon-intron-exon-exon-intron-exon-intron-exon-intron-exon-intron-exon-intron-exon-intron-exon-exon-intergenic-exon-intron-exon-intron-exon-intron-exon-intron-exon-intron-exon-intron-exon-intron-exon-exon-intron-exon-intron-exon-intron-exon-intron-exon-int…
NC_031982.2	23105201	23105671	gi|1434980878|ref|XM_003448490.4|	PREDICTED: Oreochromis niloticus complexin-4 (LOC100705335), transcript variant X1, mRNA	1	501	501	exon-exon-exon-
NC_031982.2	22933984	22934532	gi|1434979108|ref|XM_005476595.4|	PREDICTED: Oreochromis niloticus insulin receptor (LOC100696191), mRNA	1	579	579	exon-
NC_031982.2	21897747	22028103	gi|1468910214|ref|XR_003270842.1|	PREDICTED: Astatotilapia calliptera adenylate cyclase 6 (adcy6), transcript variant X1, misc_RNA	1	130387	130387	exon-intron-exon-intron-exon-intron-exon-exon-intron-exon-intron-exon-exon-intron-exon-intron-exon-intron-exon-intron-exon-intron-exon-intergenic-exon-intron-exon-intron-exon-intron-exon-intron-exon-exon-intron-exon-intergenic-exon-intergenic-intergenic-intron-
NC_031982.2	21884486	22009721	gi|1468910214|ref|XR_003270842.1|	PREDICTED: Astatotilapia calliptera adenylate cyclase 6 (adcy6), transcript variant X1, misc_RNA	1	125266	125266	exon-intron-exon-exon-intron-exon-intron-exon-intron-exon-exon-intron-exon-intron-exon-intron-exon-intron-exon-intron-exon-intron-exon-intron-exon-exon-intron-exon-intron-exon-exon-intron-exon-intron-exon-intron-exon-intron-exon-intron-exon-intergenic-exon-intron-exon-intron-exon-intergenic-exon-intergenic-intergenic-intron-
NC_031982.2	21876768	21895586	gi|1381397013|ref|XM_024804582.1|	PREDICTED: Maylandia zebra tumor necrosis factor receptor superfamily member 14-like (LOC112429656), transcript variant X1, mRNA	1	18849	18849	exon-intron-exon-intron-exon-intron-exon-intron-exon-exon-exon-intron-exon-intergenic-exon-intron-exon-intron-exon-intron-exon-intron-exon-exon-intron-exon-intron-exon-intron-exon-exon-intron-exon-intron-exon-intron-
NC_031982.2	19907459	19973697	gi|1434926413|ref|XM_025907565.1|	PREDICTED: Oreochromis niloticus piggyBac transposable element-derived protein 4 (LOC102078467), transcript variant X8, mRNA	1	66269	66269	exon-exon-intergenic-exon-intron-exon-intron-exon-exon-intron-exon-intergenic-exon-intron-exon-intron-exon-intron-exon-exon-intron-exon-intron-exon-intron-exon-intron-exon-intron-exon-intron-exon-intron-exon-intron-exon-intron-exon-intron-exon-intron-exon-intron-exon-intron-exon-exon-intron-exon-intron-exon-intron-exon-intron-intron-intron-
NC_031982.2	19905542	20024573	gi|1434926413|ref|XM_025907565.1|	PREDICTED: Oreochromis niloticus piggyBac transposable element-derived protein 4 (LOC102078467), transcript variant X8, mRNA	1	119062	119062	exon-exon-exon-intergenic-exon-intron-exon-intron-exon-exon-intron-exon-intergenic-exon-intron-exon-intron-exon-intron-exon-exon-intron-exon-intron-exon-intron-exon-intron-exon-intron-exon-intron-exon-intron-exon-intron-exon-intron-exon-intron-exon-intron-exon-intron-exon-intron-exon-exon-intron-exon-intron-exon-intron-exon-intron-exon-exon-intron-exon-intron-exon-intron-exon-intron-exon-intron-e…
NC_031982.2	19901355	19967919	gi|1434926413|ref|XM_025907565.1|	PREDICTED: Oreochromis niloticus piggyBac transposable element-derived protein 4 (LOC102078467), transcript variant X8, mRNA	1	66595	66595	exon-intron-exon-intron-exon-intron-exon-intron-exon-intron-exon-intron-exon-intron-exon-intron-exon-exon-exon-intergenic-exon-intron-exon-intron-exon-exon-intron-exon-intergenic-exon-intron-exon-intron-exon-intron-exon-exon-intron-exon-intron-exon-intron-exon-intron-exon-intron-exon-intron-exon-intron-exon-intron-intron-intron-
NC_031982.2	17405937	17439861	gi|1434978868|ref|XM_025900034.1|	PREDICTED: Oreochromis niloticus desmocollin-2-like (LOC112842746), transcript variant X1, mRNA	1	33955	33955	exon-intron-exon-intergenic-exon-intron-exon-exon-intron-exon-exon-exon-intron-exon-intron-intron-
NC_031982.2	16980759	16986758	gi|930723540|ref|XM_014332625.1|	PREDICTED: Haplochromis burtoni zinc finger protein 521 (znf521), transcript variant X5, mRNA	1	6030	6030	exon-intron-exon-
NC_031982.2	15091152	15106042	gi|1434978762|ref|XM_005476264.4|	PREDICTED: Oreochromis niloticus glypican-5 (LOC102077503), transcript variant X3, mRNA	1	14921	14921	exon-intron-exon-intron-exon-intron-exon-
NC_031982.2	15091152	15093159	gi|1434978762|ref|XM_005476264.4|	PREDICTED: Oreochromis niloticus glypican-5 (LOC102077503), transcript variant X3, mRNA	1	2038	2038	exon-intron-exon-intron-exon-
NC_031982.2	10848339	10900595	gi|118495715|dbj|AB270897.1|	Oreochromis niloticus MHC class IA antigen UBA1, UBA2, UAA1 genes, partial cds, UAA3 and UAA2 pseudogenes, UAA4, UAA5 and UAA6 pseudogene fragments	1	52287	52287	exon-intron-exon-intron-exon-intron-exon-intron-exon-intron-exon-intron-exon-intron-exon-intron-exon-intron-exon-intergenic-exon-intron-exon-exon-intron-exon-intron-exon-intron-exon-intron-exon-exon-intron-exon-intron-exon-intron-exon-intron-exon-exon-intron-exon-intron-exon-intron-exon-intron-intergenic-intron-
NC_031982.2	10847843	10900204	gi|118495715|dbj|AB270897.1|	Oreochromis niloticus MHC class IA antigen UBA1, UBA2, UAA1 genes, partial cds, UAA3 and UAA2 pseudogenes, UAA4, UAA5 and UAA6 pseudogene fragments	1	52392	52392	exon-intron-exon-intron-exon-intron-exon-intron-exon-intron-exon-intron-exon-intron-exon-intron-exon-intron-exon-intron-exon-intron-exon-intergenic-exon-intron-exon-exon-intron-exon-intron-exon-intron-exon-intron-exon-exon-intron-exon-intron-exon-intron-exon-intron-exon-exon-intron-exon-intron-exon-intron-intergenic-intron-
NC_031981.2	4034321	4047908	gi|1434975109|ref|XM_019346793.2|	PREDICTED: Oreochromis niloticus sodium-coupled monocarboxylate transporter 1 (LOC100708619), transcript variant X3, mRNA	1	13616	13616	exon-intron-exon-intergenic-exon-intron-exon-intergenic-exon-exon-exon-intron-exon-intron-exon-exon-intron-exon-intron-exon-intron-exon-intron-exon-intron-exon-intron-exon-intron-exon-intron-exon-intron-exon-intron-exon-exon-intron-exon-exon-intron-
NC_031981.2	4031691	4045355	gi|1434975109|ref|XM_019346793.2|	PREDICTED: Oreochromis niloticus sodium-coupled monocarboxylate transporter 1 (LOC100708619), transcript variant X3, mRNA	1	13693	13693	exon-intron-exon-intron-exon-intron-exon-intron-exon-intron-exon-intron-exon-intron-exon-intergenic-exon-intron-exon-intergenic-exon-exon-exon-intron-exon-intron-exon-exon-intron-exon-intron-exon-intron-exon-intron-exon-intron-exon-intron-exon-
NC_031981.2	4030993	4043847	gi|1434975109|ref|XM_019346793.2|	PREDICTED: Oreochromis niloticus sodium-coupled monocarboxylate transporter 1 (LOC100708619), transcript variant X3, mRNA	1	12883	12883	exon-intron-exon-intron-exon-intron-exon-intron-exon-intron-exon-intron-exon-intron-exon-intron-exon-intron-exon-intergenic-exon-intron-exon-intergenic-exon-exon-exon-intron-exon-intron-exon-exon-intron-exon-intron-exon-intron-exon-intron-exon-
NC_031981.2	37978522	37981100	gi|1434977029|ref|XM_003449744.5|	PREDICTED: Oreochromis niloticus SET binding factor 1 (sbf1), transcript variant X5, mRNA	1	2609	2609	exon-intron-exon-intron-exon-intron-exon-intron-exon-intron-exon-intron-exon-intron-exon-
NC_031981.2	32616550	32617575	gi|1434976301|ref|XM_025899546.1|	PREDICTED: Oreochromis niloticus synapse defective Rho GTPase homolog 2 (syde2), transcript variant X2, mRNA	1	1056	1056	exon-intron-exon-
NC_031981.2	31558669	31785978	gi|1468918882|ref|XR_003271216.1|	PREDICTED: Astatotilapia calliptera zinc finger BED domain-containing protein 4-like (LOC113016343), transcript variant X4, misc_RNA	1	227340	227340	exon-intron-exon-intron-exon-intron-exon-intron-exon-intron-exon-intron-exon-intron-exon-exon-exon-exon-intron-exon-intron-exon-exon-intron-exon-intron-exon-intron-exon-intron-exon-intron-exon-intron-exon-intron-exon-intron-exon-intron-exon-intron-exon-exon-intron-exon-intron-exon-intron-exon-intron-exon-exon-exon-exon-intron-exon-intron-exon-intron-exon-intergenic-exon-intron-exon-intron-exon-ex…
NC_031981.2	31557573	31785096	gi|1468918882|ref|XR_003271216.1|	PREDICTED: Astatotilapia calliptera zinc finger BED domain-containing protein 4-like (LOC113016343), transcript variant X4, misc_RNA	1	227554	227554	exon-intron-exon-intron-exon-intron-exon-intron-exon-intron-exon-intron-exon-intron-exon-intron-exon-intron-exon-intron-exon-exon-exon-exon-intron-exon-intron-exon-exon-intron-exon-intron-exon-intron-exon-intron-exon-intron-exon-intron-exon-intron-exon-intron-exon-intron-exon-intron-exon-exon-intron-exon-intron-exon-intron-exon-intron-exon-exon-exon-exon-intron-exon-intron-exon-intron-exon-interg…
NC_031981.2	31524359	31769498	gi|1468918882|ref|XR_003271216.1|	PREDICTED: Astatotilapia calliptera zinc finger BED domain-containing protein 4-like (LOC113016343), transcript variant X4, misc_RNA	1	245170	245170	exon-intron-exon-intron-exon-intron-exon-intron-exon-intron-exon-intron-exon-intron-exon-intron-exon-exon-intron-exon-intron-exon-intron-exon-intron-exon-intron-exon-exon-intron-exon-intron-exon-intron-exon-intron-exon-intron-exon-intron-exon-intron-exon-intron-exon-intron-exon-intron-exon-intron-exon-intron-exon-exon-exon-exon-intron-exon-intron-exon-exon-intron-exon-intron-exon-intron-exon-intr…
NC_031981.2	27628589	27663172	gi|1059791593|gb|AH013711.2|	Oreochromis niloticus KLR3 (KLR3) gene, exons 2 through 7; KLR2 pseudogene, partial sequence; KLR1 gene, complete sequence; KLR4 (KLR4) gene, exons 2 through 7; KLR5 (KLR5) gene, exons 1 through 7; KLR6 and KLR7 pseudogenes, complete sequence; KLR9 (KLR10) pseudogene, exons 4 through 7; KLR8 pseudogene, partial sequence; KLR9 (KLR9) gene, exons 1 through 7; C-type lectin (CLECT2)-like protein gen…	1	34614	34614	exon-intron-exon-intron-exon-exon-intron-exon-exon-exon-intron-exon-intron-exon-intron-exon-intron-exon-intron-exon-intron-exon-intron-exon-intron-exon-intron-exon-intron-exon-intron-exon-exon-intron-exon-intron-exon-intron-exon-intron-exon-intron-exon-exon-exon-intron-exon-intron-exon-intergenic-intron-
NC_031981.2	27604771	27654499	gi|1059791593|gb|AH013711.2|	Oreochromis niloticus KLR3 (KLR3) gene, exons 2 through 7; KLR2 pseudogene, partial sequence; KLR1 gene, complete sequence; KLR4 (KLR4) gene, exons 2 through 7; KLR5 (KLR5) gene, exons 1 through 7; KLR6 and KLR7 pseudogenes, complete sequence; KLR9 (KLR10) pseudogene, exons 4 through 7; KLR8 pseudogene, partial sequence; KLR9 (KLR9) gene, exons 1 through 7; C-type lectin (CLECT2)-like protein gen…	1	49759	49759	exon-exon-intron-exon-intron-exon-intron-exon-intron-exon-intron-exon-exon-intron-exon-intron-exon-intron-exon-intron-exon-intron-exon-intron-exon-exon-intron-exon-intron-exon-intron-exon-intron-exon-exon-intron-exon-intron-exon-intron-exon-intron-exon-intron-exon-exon-intron-exon-exon-exon-intron-exon-intron-exon-intron-exon-intron-exon-intron-exon-intron-exon-intron-exon-intron-exon-intron-exon…
NC_031981.2	27542836	27667269	gi|1434946779|ref|XM_005471898.3|	PREDICTED: Oreochromis niloticus trichohyalin-like (LOC102082957), mRNA	1	124464	124464	exon-intron-exon-intron-exon-intron-exon-intron-exon-exon-intron-exon-intron-exon-exon-intron-exon-intron-exon-intron-exon-exon-intron-exon-exon-intron-exon-exon-intron-exon-exon-intron-exon-intron-exon-intron-exon-intron-exon-exon-exon-intron-exon-intron-exon-exon-intron-exon-intron-exon-intron-exon-intron-exon-intron-exon-exon-intron-exon-intron-exon-intron-exon-intron-exon-intron-exon-exon-int…
NC_031981.2	27542836	27653751	gi|1434946779|ref|XM_005471898.3|	PREDICTED: Oreochromis niloticus trichohyalin-like (LOC102082957), mRNA	1	110946	110946	exon-intron-exon-intron-exon-intron-exon-intron-exon-exon-intron-exon-intron-exon-exon-intron-exon-intron-exon-intron-exon-exon-intron-exon-exon-intron-exon-exon-intron-exon-exon-intron-exon-intron-exon-intron-exon-intron-exon-exon-exon-intron-exon-intron-exon-exon-intron-exon-intron-exon-intron-exon-intron-exon-intron-exon-exon-intron-exon-intron-exon-intron-exon-intron-exon-intron-exon-exon-int…
NC_031981.2	27529803	27684388	gi|1434946779|ref|XM_005471898.3|	PREDICTED: Oreochromis niloticus trichohyalin-like (LOC102082957), mRNA	1	154616	154616	exon-exon-intergenic-exon-intron-exon-intergenic-exon-exon-intron-exon-intron-exon-intron-exon-intron-exon-intron-exon-exon-intron-exon-intron-exon-exon-intron-exon-intron-exon-intron-exon-exon-intron-exon-exon-intron-exon-exon-intron-exon-exon-intron-exon-intron-exon-intron-exon-intron-exon-exon-exon-intron-exon-intron-exon-exon-intron-exon-intron-exon-intron-exon-intron-exon-intron-exon-exon-in…
NC_031981.2	27499790	27533199	gi|723802023|tpe|BN000676.1|	TPA: Xenopus tropicalis Tc1-like transposon, Beagle	1	33440	33440	exon-exon-intron-exon-intron-exon-intron-exon-intron-exon-intergenic-exon-intron-exon-exon-exon-exon-intron-exon-intron-exon-intron-exon-exon-exon-intron-exon-intron-exon-intron-exon-intron-exon-exon-intergenic-exon-intron-exon-intergenic-exon-intergenic-intron-
NC_031981.2	27486615	27533199	gi|723802023|tpe|BN000676.1|	TPA: Xenopus tropicalis Tc1-like transposon, Beagle	1	46615	46615	exon-intron-exon-intron-exon-intron-exon-intron-exon-intergenic-exon-exon-exon-intron-exon-intron-exon-exon-intron-exon-exon-intron-exon-intron-exon-intron-exon-intron-exon-intergenic-exon-intron-exon-exon-exon-exon-intron-exon-intron-exon-intron-exon-exon-exon-intron-exon-intron-exon-intron-exon-intron-exon-exon-intergenic-exon-intron-exon-intergenic-exon-intron-intergenic-intron-
NC_031981.2	27267347	27267889	gi|1434976297|ref|XM_003457295.5|	PREDICTED: Oreochromis niloticus GDP-mannose 4,6-dehydratase (gmds), mRNA	1	573	573	exon-intron-exon-
NC_031981.2	21430072	21442596	gi|1434976856|ref|XM_025899666.1|	PREDICTED: Oreochromis niloticus NACHT, LRR and PYD domains-containing protein 12 (LOC100692765), mRNA	1	12555	12555	exon-exon-intron-exon-intron-exon-intron-exon-intergenic-intron-
NC_031981.2	19641941	19649503	gi|1434975634|ref|XM_019346826.2|	PREDICTED: Oreochromis niloticus tetraspanin-8 (LOC102081043), mRNA	1	7593	7593	exon-intron-exon-exon-intron-exon-intron-exon-intron-intron-exon-intron-exon-intron-exon-intron-exon-intron-exon-exon-intron-exon-exon-exon-
NC_031981.2	19641648	19649029	gi|1434975634|ref|XM_019346826.2|	PREDICTED: Oreochromis niloticus tetraspanin-8 (LOC102081043), mRNA	1	7412	7412	exon-exon-intron-exon-intron-exon-exon-intron-exon-intron-exon-intron-intron-exon-intron-exon-intron-exon-intron-exon-intron-exon-exon-exon-
NC_031981.2	12590903	12594749	gi|1434976347|ref|XM_019347071.2|	PREDICTED: Oreochromis niloticus voltage-dependent calcium channel subunit alpha-2/delta-1 (LOC100705144), transcript variant X6, mRNA	1	3877	3877	exon-intron-exon-intron-exon-intron-exon-
NC_031981.2	12545456	12549945	gi|1434976347|ref|XM_019347071.2|	PREDICTED: Oreochromis niloticus voltage-dependent calcium channel subunit alpha-2/delta-1 (LOC100705144), transcript variant X6, mRNA	1	4520	4520	exon-intron-exon-intron-exon-
NC_031981.2	12544517	12549945	gi|1434976347|ref|XM_019347071.2|	PREDICTED: Oreochromis niloticus voltage-dependent calcium channel subunit alpha-2/delta-1 (LOC100705144), transcript variant X6, mRNA	1	5459	5459	exon-intron-exon-intron-exon-intron-
NC_031981.2	10272056	10281829	gi|1434976700|ref|XR_003214533.1|	PREDICTED: Oreochromis niloticus ELKS/Rab6-interacting/CAST family member 1 (LOC100690550), transcript variant X11, misc_RNA	1	9804	9804	exon-exon-intron-exon-intron-exon-intron-
NC_031981.2	10238150	10281829	gi|1434976128|ref|XM_005451686.4|	PREDICTED: Oreochromis niloticus trichohyalin-like (LOC102077753), mRNA	1	43710	43710	exon-exon-exon-intron-exon-intron-exon-intron-intron-
NC_031980.2	9665228	9672963	gi|299322|gb|S57288.1|S57288	{repetitive sequence SATB} [Oreochromis niloticus, Genomic, 1904 nt]	1	7764	7764	exon-intron-exon-exon-intron-exon-intron-exon-intron-exon-exon-intron-exon-exon-intron-exon-intron-exon-intron-
NC_031980.2	896114	897054	gi|930729063|ref|XM_005917127.2|	PREDICTED: Haplochromis burtoni serine/threonine-protein kinase MRCK alpha-like (LOC102297448), transcript variant X4, mRNA	1	967	967	exon-intron-exon-intron-exon-intron-exon-
NC_031980.2	6495031	6495347	gi|1434907202|ref|XM_025898949.1|	PREDICTED: Oreochromis niloticus protocadherin alpha-8-like (LOC112842411), mRNA	1	345	345	intron-
NC_031980.2	6476381	6500453	gi|1434907202|ref|XM_025898949.1|	PREDICTED: Oreochromis niloticus protocadherin alpha-8-like (LOC112842411), mRNA	1	24101	24101	exon-intron-exon-intron-exon-exon-intron-exon-intron-exon-intron-exon-exon-intron-
NC_031980.2	32787027	32789391	gi|583993873|ref|XM_006792024.1|	PREDICTED: Neolamprologus brichardi trimeric intracellular cation channel type A-like (LOC102777740), mRNA	1	2395	2395	exon-intron-exon-intron-exon-intron-exon-
NC_031980.2	31400423	31430226	gi|329556156|gb|JF284171.1|	Oreochromis aureus female-specific RAPD marker OauF1488 genomic sequence	1	29834	29834	exon-intron-exon-exon-intron-
NC_031980.2	26941650	26950427	gi|1434968783|ref|XM_005460228.4|	PREDICTED: Oreochromis niloticus ankyrin repeat and SOCS box protein 2 (LOC100706505), transcript variant X5, mRNA	1	8808	8808	exon-intron-exon-intron-exon-intron-exon-intron-exon-intron-exon-intron-exon-
NC_031980.2	26908108	26910014	gi|1434968764|ref|XM_025898869.1|	PREDICTED: Oreochromis niloticus putative E3 ubiquitin-protein ligase UBR7 (LOC100699512), transcript variant X5, mRNA	1	1937	1937	exon-intron-exon-intron-exon-
NC_031980.2	24912501	24922930	gi|1434967875|ref|XM_013272263.2|	PREDICTED: Oreochromis niloticus adhesion G protein-coupled receptor G6 (adgrg6), transcript variant X5, mRNA	1	10460	10460	exon-intron-exon-exon-intron-exon-intron-exon-exon-exon-intron-exon-intron-exon-intron-exon-intron-exon-
NC_031980.2	24571835	24571912	gi|930752889|ref|XM_005936242.2|	PREDICTED: Haplochromis burtoni beta-taxilin-like (LOC102308838), mRNA	1	108	108	exon-
NC_031980.2	21553142	21553361	gi|1049260762|ref|XM_017714695.1|	PREDICTED: Pygocentrus nattereri hydroperoxide isomerase ALOXE3-like (LOC108437541), mRNA	1	250	250	intergenic-
NC_031980.2	11807379	11853733	gi|1434968282|ref|XM_019345512.2|	PREDICTED: Oreochromis niloticus apolipoprotein B-100 (LOC100697064), mRNA	1	46385	46385	exon-exon-intron-exon-intron-exon-intron-exon-intron-exon-intron-exon-intron-exon-intron-exon-intron-exon-intron-exon-intron-exon-intergenic-exon-intron-exon-intron-exon-intron-exon-intergenic-exon-exon-intron-exon-intron-exon-intron-exon-intron-exon-intron-exon-intron-exon-intron-exon-intron-exon-intron-exon-intron-exon-intron-exon-intron-exon-intron-exon-intergenic-exon-intron-exon-exon-interge…
NC_031980.2	11803553	11850174	gi|1434968282|ref|XM_019345512.2|	PREDICTED: Oreochromis niloticus apolipoprotein B-100 (LOC100697064), mRNA	1	46652	46652	exon-intron-exon-intron-exon-exon-intron-exon-intron-exon-intron-exon-intron-exon-intron-exon-intron-exon-intron-exon-intron-exon-intron-exon-intron-exon-intergenic-exon-intron-exon-intron-exon-intron-exon-intergenic-exon-exon-intron-exon-intron-exon-intron-exon-intron-exon-intron-exon-intron-exon-intron-exon-intron-exon-intron-exon-intron-exon-intron-exon-intron-exon-intron-exon-intergenic-exon-…
NC_031979.2	8479048	8481489	gi|1434966975|ref|XM_019367675.2|	PREDICTED: Oreochromis niloticus histone H3.3 (LOC100691280), mRNA	1	2470	2470	exon-intron-exon-intron-exon-intergenic-exon-
NC_031979.2	5328821	5337764	gi|313150351|dbj|AB505452.1|	Rana rugosa got1 gene for glutamate oxaloacetate transaminase, partial cds	1	8972	8972	exon-intron-exon-intron-exon-intron-exon-intron-exon-
NC_031979.2	5190613	5198088	gi|1468910919|ref|XM_026154972.1|	PREDICTED: Astatotilapia calliptera tripartite motif-containing protein 54-like (LOC113013803), transcript variant X7, mRNA	1	7504	7504	exon-exon-intron-exon-intron-
NC_031979.2	4492615	4495075	gi|1468879654|ref|XM_026193492.1|	PREDICTED: Astatotilapia calliptera Na(+)/H(+) exchange regulatory cofactor NHE-RF3-like (LOC113036904), mRNA	1	2489	2489	exon-intron-exon-intron-exon-intron-exon-
NC_031979.2	39586020	39592536	gi|118495715|dbj|AB270897.1|	Oreochromis niloticus MHC class IA antigen UBA1, UBA2, UAA1 genes, partial cds, UAA3 and UAA2 pseudogenes, UAA4, UAA5 and UAA6 pseudogene fragments	1	6547	6547	exon-intron-exon-intron-exon-
NC_031979.2	36007343	36016714	gi|1434966935|ref|XM_019367605.2|	PREDICTED: Oreochromis niloticus delta(3,5)-Delta(2,4)-dienoyl-CoA isomerase, mitochondrial (LOC100709616), mRNA	1	9402	9402	exon-intron-exon-intron-exon-intron-exon-intron-exon-intron-exon-intron-exon-intron-exon-intron-exon-intron-exon-exon-intron-exon-intron-exon-intron-exon-intron-
NC_031979.2	34743807	34744810	gi|1434964535|ref|XM_003456381.4|	PREDICTED: Oreochromis niloticus creatine kinase M-type (LOC100702938), mRNA	1	1034	1034	exon-intron-exon-intron-exon-
NC_031979.2	33566995	33567331	gi|1434964623|ref|XM_019345203.2|	PREDICTED: Oreochromis niloticus ryanodine receptor 1 (LOC100709030), transcript variant X19, mRNA	1	367	367	exon-intron-exon-
NC_031979.2	3312024	3324963	gi|1434966285|ref|XM_019367617.2|	PREDICTED: Oreochromis niloticus BCAS3, microtubule associated cell migration factor (bcas3), transcript variant X8, mRNA	1	12968	12968	exon-intron-exon-intron-exon-intron-exon-intron-exon-intron-exon-
NC_031979.2	28109013	28119300	gi|1434967679|ref|XM_025898654.1|	PREDICTED: Oreochromis niloticus nascent polypeptide-associated complex subunit alpha, muscle-specific form-like (LOC109199352), mRNA	1	10318	10318	exon-exon-intron-exon-intron-exon-intron-exon-intergenic-exon-intron-exon-intron-
NC_031979.2	28041838	28047711	gi|1434965485|ref|XM_003440278.5|	PREDICTED: Oreochromis niloticus dehydrogenase/reductase SDR family member 11 (LOC100694479), mRNA	1	5904	5904	exon-intron-exon-intron-exon-intron-exon-intron-exon-intron-exon-exon-intergenic-exon-intron-exon-
NC_031979.2	24606047	24609702	gi|1434964710|ref|XM_005459297.4|	PREDICTED: Oreochromis niloticus membrane metalloendopeptidase (mme), transcript variant X3, mRNA	1	3686	3686	exon-intron-exon-intron-exon-exon-intron-
NC_031979.2	23803305	23813927	gi|1434964997|ref|XM_019367764.2|	PREDICTED: Oreochromis niloticus low affinity immunoglobulin gamma Fc region receptor III-A (LOC102080526), mRNA	1	10653	10653	exon-intron-exon-intron-exon-exon-intron-exon-intron-exon-intron-exon-intron-exon-intron-
NC_031979.2	23743946	23764621	gi|118495715|dbj|AB270897.1|	Oreochromis niloticus MHC class IA antigen UBA1, UBA2, UAA1 genes, partial cds, UAA3 and UAA2 pseudogenes, UAA4, UAA5 and UAA6 pseudogene fragments	1	20706	20706	exon-exon-intron-exon-exon-intron-exon-intron-exon-intron-exon-intron-exon-intron-exon-intron-exon-intron-exon-intergenic-
NC_031979.2	23188464	23189463	gi|1434963974|ref|XM_005459369.4|	PREDICTED: Oreochromis niloticus cut like homeobox 1 (cux1), transcript variant X2, mRNA	1	1030	1030	exon-intron-exon-intron-exon-
NC_031979.2	20060175	20087906	gi|118495715|dbj|AB270897.1|	Oreochromis niloticus MHC class IA antigen UBA1, UBA2, UAA1 genes, partial cds, UAA3 and UAA2 pseudogenes, UAA4, UAA5 and UAA6 pseudogene fragments	1	27762	27762	intron-exon-intergenic-exon-intron-exon-intron-exon-intron-exon-exon-intron-exon-intron-exon-exon-intron-exon-exon-intron-exon-intron-exon-intron-exon-intron-exon-intron-exon-intron-exon-intron-exon-intron-exon-intron-exon-intron-exon-intron-exon-intron-exon-exon-intron-exon-intron-exon-intron-exon-intron-exon-intron-exon-intron-exon-intron-exon-intron-exon-intron-exon-intron-exon-intron-exon-int…
NC_031979.2	17034562	17098407	gi|1434964274|ref|XM_025898017.1|	PREDICTED: Oreochromis niloticus von Willebrand factor A domain-containing protein 5A (LOC100702702), transcript variant X38, mRNA	1	63876	63876	intron-exon-intron-exon-intron-exon-intron-exon-intron-exon-intron-intron-exon-intron-exon-intron-exon-intron-exon-intron-exon-intron-exon-intron-exon-intron-exon-intron-exon-exon-intron-exon-exon-intron-exon-intron-exon-intron-exon-intron-exon-exon-intron-exon-intron-exon-intron-exon-intron-exon-intron-exon-intron-exon-intron-exon-exon-intron-exon-exon-intron-exon-intron-exon-intron-exon-intron-…
NC_031979.2	17019818	17128021	gi|118495715|dbj|AB270897.1|	Oreochromis niloticus MHC class IA antigen UBA1, UBA2, UAA1 genes, partial cds, UAA3 and UAA2 pseudogenes, UAA4, UAA5 and UAA6 pseudogene fragments	1	108234	108234	exon-intron-exon-intron-exon-intron-exon-intron-exon-intron-exon-intron-exon-exon-intron-exon-intron-exon-intron-exon-intron-exon-exon-intron-exon-exon-exon-intron-exon-intron-exon-exon-exon-intron-exon-intron-exon-intron-exon-intron-exon-intron-exon-intron-exon-exon-intron-exon-exon-intron-exon-intron-exon-intron-exon-intron-exon-intron-exon-intron-exon-intron-exon-intron-exon-intron-intron-exon…
NC_031979.2	17017583	17089487	gi|1434964272|ref|XM_025898016.1|	PREDICTED: Oreochromis niloticus von Willebrand factor A domain-containing protein 5A (LOC100702702), transcript variant X37, mRNA	1	71935	71935	exon-intron-exon-intron-exon-intron-exon-intron-exon-intron-exon-intron-exon-intron-exon-intron-exon-intron-exon-intron-exon-exon-intron-exon-intron-exon-intron-exon-intron-exon-exon-intron-exon-exon-exon-intron-exon-intron-exon-exon-exon-intron-exon-intron-exon-intron-exon-intron-exon-intron-exon-intron-exon-exon-intron-exon-exon-intron-exon-intron-exon-intron-exon-intron-exon-intron-exon-intron…
NC_031979.2	17014174	17103628	gi|1434964272|ref|XM_025898016.1|	PREDICTED: Oreochromis niloticus von Willebrand factor A domain-containing protein 5A (LOC100702702), transcript variant X37, mRNA	1	89485	89485	exon-intron-exon-intron-exon-intron-exon-intron-exon-intron-exon-intron-exon-intron-exon-intron-exon-intron-exon-intron-exon-intron-exon-intron-exon-intron-exon-exon-intron-exon-intron-exon-intron-exon-intron-exon-exon-intron-exon-exon-exon-intron-exon-intron-exon-exon-exon-intron-exon-intron-exon-intron-exon-intron-exon-intron-exon-intron-exon-exon-intron-exon-exon-intron-exon-intron-exon-intron…
NC_031979.2	17008844	17168764	gi|1434964268|ref|XM_025898014.1|	PREDICTED: Oreochromis niloticus von Willebrand factor A domain-containing protein 5A (LOC100702702), transcript variant X35, mRNA	1	159951	159951	exon-intron-exon-intron-exon-intron-exon-intron-exon-intron-exon-intron-exon-intron-exon-intron-exon-intron-exon-intron-exon-intron-exon-intron-exon-intron-exon-intron-exon-intron-exon-intron-exon-intron-exon-intron-exon-intron-exon-intron-exon-intron-exon-exon-intron-exon-intron-exon-intron-exon-intron-exon-exon-intron-exon-exon-exon-intron-exon-intron-exon-exon-exon-intron-exon-intron-exon-intr…
NC_031979.2	17006271	17018372	gi|1434964293|ref|XM_025898026.1|	PREDICTED: Oreochromis niloticus von Willebrand factor A domain-containing protein 5A (LOC100702702), transcript variant X49, mRNA	1	12132	12132	exon-exon-intron-exon-intron-exon-intron-exon-intron-exon-intron-exon-intron-exon-intron-exon-intron-exon-intron-exon-intron-exon-intron-exon-intron-exon-intron-exon-intron-
NC_031979.2	16967584	17105969	gi|118495715|dbj|AB270897.1|	Oreochromis niloticus MHC class IA antigen UBA1, UBA2, UAA1 genes, partial cds, UAA3 and UAA2 pseudogenes, UAA4, UAA5 and UAA6 pseudogene fragments	1	138416	138416	exon-intron-exon-intron-exon-intron-exon-intron-exon-intron-exon-intron-intron-exon-intron-exon-intron-exon-intergenic-exon-exon-exon-intron-exon-intron-exon-intron-exon-intron-exon-intron-exon-intron-exon-intron-exon-intron-exon-intron-exon-intron-exon-intron-exon-intron-exon-intron-exon-exon-intron-exon-intron-exon-intron-exon-exon-intron-exon-intron-exon-intron-exon-intron-exon-intron-exon-int…
NC_031979.2	16961565	17101140	gi|118495715|dbj|AB270897.1|	Oreochromis niloticus MHC class IA antigen UBA1, UBA2, UAA1 genes, partial cds, UAA3 and UAA2 pseudogenes, UAA4, UAA5 and UAA6 pseudogene fragments	1	139606	139606	exon-intron-exon-intron-exon-intron-exon-intron-exon-intron-exon-intron-exon-intron-exon-intron-exon-intron-exon-intron-exon-intron-exon-intron-exon-intron-exon-intron-exon-intron-exon-intron-intron-exon-intron-exon-intron-exon-intergenic-exon-exon-exon-intron-exon-intron-exon-intron-exon-intron-exon-intron-exon-intron-exon-intron-exon-intron-exon-intron-exon-intron-exon-intron-exon-intron-exon-i…
NC_031979.2	16934946	17103628	gi|118495715|dbj|AB270897.1|	Oreochromis niloticus MHC class IA antigen UBA1, UBA2, UAA1 genes, partial cds, UAA3 and UAA2 pseudogenes, UAA4, UAA5 and UAA6 pseudogene fragments	1	168713	168713	exon-intron-exon-intron-exon-intron-exon-intron-exon-exon-intron-exon-intron-exon-intron-exon-intron-exon-intron-exon-intron-exon-intron-exon-intron-exon-intron-exon-exon-intron-exon-intron-exon-exon-intron-exon-exon-intron-exon-exon-exon-intron-exon-intergenic-exon-intron-exon-intron-exon-intron-exon-intron-exon-intron-exon-intron-exon-intron-exon-intron-exon-intron-exon-intron-exon-intron-exon-…
NC_031979.2	15964322	15966507	gi|1434965513|ref|XM_005474597.4|	PREDICTED: Oreochromis niloticus Fli-1 proto-oncogene, ETS transcription factor (fli1), transcript variant X4, mRNA	1	2216	2216	exon-intron-exon-exon-intron-exon-
NC_031979.2	13301603	13305188	gi|1381374697|ref|XM_014408648.3|	PREDICTED: Maylandia zebra acetylcholinesterase (LOC101487581), transcript variant X3, mRNA	1	3616	3616	exon-exon-intron-exon-intron-
NC_031979.2	11373844	11438680	gi|118495715|dbj|AB270897.1|	Oreochromis niloticus MHC class IA antigen UBA1, UBA2, UAA1 genes, partial cds, UAA3 and UAA2 pseudogenes, UAA4, UAA5 and UAA6 pseudogene fragments	1	64867	64867	exon-intron-exon-intron-exon-exon-intron-exon-intron-exon-intron-exon-intron-exon-intron-exon-intron-exon-intron-exon-intron-exon-intron-exon-intron-exon-exon-intron-exon-intron-exon-intron-exon-exon-intergenic-exon-intron-exon-intron-exon-intron-exon-intron-exon-intron-exon-intron-exon-intron-exon-exon-intron-exon-intron-intron-intron-intergenic-
NC_031979.2	11277765	11448883	gi|1059791593|gb|AH013711.2|	Oreochromis niloticus KLR3 (KLR3) gene, exons 2 through 7; KLR2 pseudogene, partial sequence; KLR1 gene, complete sequence; KLR4 (KLR4) gene, exons 2 through 7; KLR5 (KLR5) gene, exons 1 through 7; KLR6 and KLR7 pseudogenes, complete sequence; KLR9 (KLR10) pseudogene, exons 4 through 7; KLR8 pseudogene, partial sequence; KLR9 (KLR9) gene, exons 1 through 7; C-type lectin (CLECT2)-like protein gen…	1	171149	171149	exon-intron-exon-intron-exon-intron-exon-intron-exon-intron-exon-intron-exon-intron-exon-exon-exon-exon-exon-intron-exon-intron-exon-intron-exon-intron-exon-exon-intron-exon-intron-exon-exon-intron-exon-intron-exon-exon-intron-exon-intron-exon-intron-exon-intron-exon-exon-exon-intron-intron-exon-intergenic-exon-intron-exon-intron-exon-intron-exon-intron-exon-exon-intron-exon-intron-exon-intron-ex…
NC_031979.2	11277765	11391570	gi|1059791593|gb|AH013711.2|	Oreochromis niloticus KLR3 (KLR3) gene, exons 2 through 7; KLR2 pseudogene, partial sequence; KLR1 gene, complete sequence; KLR4 (KLR4) gene, exons 2 through 7; KLR5 (KLR5) gene, exons 1 through 7; KLR6 and KLR7 pseudogenes, complete sequence; KLR9 (KLR10) pseudogene, exons 4 through 7; KLR8 pseudogene, partial sequence; KLR9 (KLR9) gene, exons 1 through 7; C-type lectin (CLECT2)-like protein gen…	1	113836	113836	exon-intron-exon-intron-exon-intron-exon-intron-exon-intron-exon-intron-exon-intron-exon-exon-exon-exon-exon-intron-exon-intron-exon-intron-exon-intron-exon-exon-intron-exon-intron-exon-exon-intron-exon-intron-exon-exon-intron-exon-intron-exon-intron-exon-intron-exon-exon-exon-intron-intron-exon-intergenic-exon-intron-exon-intron-exon-intron-exon-intron-exon-exon-intron-exon-intron-exon-intron-ex…
NC_031979.2	11269987	11444700	gi|1059791593|gb|AH013711.2|	Oreochromis niloticus KLR3 (KLR3) gene, exons 2 through 7; KLR2 pseudogene, partial sequence; KLR1 gene, complete sequence; KLR4 (KLR4) gene, exons 2 through 7; KLR5 (KLR5) gene, exons 1 through 7; KLR6 and KLR7 pseudogenes, complete sequence; KLR9 (KLR10) pseudogene, exons 4 through 7; KLR8 pseudogene, partial sequence; KLR9 (KLR9) gene, exons 1 through 7; C-type lectin (CLECT2)-like protein gen…	1	174744	174744	exon-exon-intron-exon-intron-exon-intron-exon-intron-exon-intron-exon-intron-exon-intron-exon-intron-exon-intron-exon-intron-exon-exon-exon-exon-exon-intron-exon-intron-exon-intron-exon-intron-exon-exon-intron-exon-intron-exon-exon-intron-exon-intron-exon-exon-intron-exon-intron-exon-intron-exon-intron-exon-exon-exon-intron-intron-exon-intergenic-exon-intron-exon-intron-exon-intron-exon-intron-ex…
NC_031979.2	10922884	10958973	gi|1468883830|ref|XM_026143023.1|	PREDICTED: Astatotilapia calliptera zinc finger MYM-type protein 1-like (LOC113006830), mRNA	1	36120	36120	exon-intron-exon-intron-exon-intron-exon-intron-exon-intron-exon-intron-exon-intron-exon-exon-intron-exon-intron-exon-intron-exon-intron-exon-intron-exon-intron-exon-intron-exon-intron-exon-exon-exon-intron-exon-intergenic-exon-intron-exon-intron-exon-intron-exon-intron-exon-intron-exon-intron-exon-intron-exon-intron-intergenic-
NC_031979.2	10916734	11309417	gi|1468883830|ref|XM_026143023.1|	PREDICTED: Astatotilapia calliptera zinc finger MYM-type protein 1-like (LOC113006830), mRNA	1	392714	392714	exon-intron-exon-intron-exon-intron-exon-intron-exon-intron-exon-intron-exon-exon-intron-exon-intron-exon-intron-exon-intron-exon-intron-exon-intron-exon-intron-exon-intron-exon-intron-exon-exon-intron-exon-intron-exon-intron-exon-intron-exon-intron-exon-intron-exon-intron-exon-intron-exon-exon-exon-intron-exon-intergenic-exon-intron-exon-intron-exon-intron-exon-intron-exon-intron-exon-intron-exo…
NC_031979.2	10916734	11243985	gi|1468883830|ref|XM_026143023.1|	PREDICTED: Astatotilapia calliptera zinc finger MYM-type protein 1-like (LOC113006830), mRNA	1	327282	327282	exon-intron-exon-intron-exon-intron-exon-intron-exon-intron-exon-intron-exon-exon-intron-exon-intron-exon-intron-exon-intron-exon-intron-exon-intron-exon-intron-exon-intron-exon-intron-exon-exon-intron-exon-intron-exon-intron-exon-intron-exon-intron-exon-intron-exon-intron-exon-intron-exon-exon-exon-intron-exon-intergenic-exon-intron-exon-intron-exon-intron-exon-intron-exon-intron-exon-intron-exo…
NC_031979.2	10897524	10963013	gi|1468883830|ref|XM_026143023.1|	PREDICTED: Astatotilapia calliptera zinc finger MYM-type protein 1-like (LOC113006830), mRNA	1	65520	65520	exon-intron-exon-intron-exon-exon-intron-exon-intergenic-exon-exon-intron-exon-intron-exon-exon-intron-exon-intron-exon-intron-exon-intron-exon-intron-exon-intron-exon-intron-exon-exon-intron-exon-intron-exon-intron-exon-intron-exon-intron-exon-intron-exon-intron-exon-intron-exon-intron-exon-exon-intron-exon-intron-exon-intron-exon-intron-exon-intron-exon-intron-exon-intron-exon-intron-exon-exon-…
NC_031979.2	10865805	10921571	gi|1434914324|ref|XM_025905929.1|	PREDICTED: Oreochromis niloticus zinc finger MYM-type protein 1-like (LOC112846433), mRNA	1	55797	55797	exon-intron-exon-intron-exon-intron-exon-intron-exon-intron-exon-intron-exon-intron-exon-intron-exon-intron-exon-intron-exon-intron-exon-intron-exon-intron-exon-exon-intron-exon-intron-exon-intron-exon-intron-exon-intron-exon-intron-exon-intron-exon-intergenic-exon-intron-exon-intron-exon-intron-exon-intron-exon-intron-exon-intron-exon-intron-exon-intron-exon-intron-exon-intron-exon-exon-intron-e…
NC_031978.2	97182	105225	gi|584031099|ref|XM_006809945.1|	PREDICTED: Neolamprologus brichardi LIM domain-binding protein 3-like (LOC102797234), mRNA	1	8069	8069	exon-exon-intron-exon-intron-exon-intron-exon-intron-
NC_031978.2	6363417	6374682	gi|1434962380|ref|XR_003213534.1|	PREDICTED: Oreochromis niloticus mitogen-activated protein kinase kinase kinase 2-like (LOC109204840), transcript variant X3, misc_RNA	1	11294	11294	intergenic-exon-intron-exon-intron-exon-intron-exon-exon-intron-exon-intron-exon-exon-exon-exon-exon-exon-exon-exon-intron-exon-intron-exon-intron-exon-intron-exon-exon-intron-exon-exon-exon-exon-intron-exon-intron-exon-intron-exon-intron-
NC_031978.2	34214876	34314295	gi|118495715|dbj|AB270897.1|	Oreochromis niloticus MHC class IA antigen UBA1, UBA2, UAA1 genes, partial cds, UAA3 and UAA2 pseudogenes, UAA4, UAA5 and UAA6 pseudogene fragments	1	99450	99450	exon-intron-exon-intron-exon-intron-exon-intron-exon-intron-exon-exon-intron-exon-intron-exon-intron-exon-exon-intron-exon-intron-exon-intergenic-exon-intron-exon-exon-exon-exon-intron-exon-intron-exon-intron-exon-intron-exon-intron-exon-intron-exon-intron-exon-intergenic-intron-intron-intergenic-intron-
NC_031978.2	30759710	30763908	gi|1434961369|ref|XM_005461429.4|	PREDICTED: Oreochromis niloticus piezo type mechanosensitive ion channel component 1 (piezo1), mRNA	1	4229	4229	exon-intron-exon-intron-exon-intron-exon-intron-exon-
NC_031978.2	30702661	30704116	gi|1434961369|ref|XM_005461429.4|	PREDICTED: Oreochromis niloticus piezo type mechanosensitive ion channel component 1 (piezo1), mRNA	1	1486	1486	exon-exon-intron-
NC_031978.2	27805023	27862935	gi|1434961994|ref|XM_019366507.2|	PREDICTED: Oreochromis niloticus transmembrane protein 254 (LOC109204777), mRNA	1	57943	57943	exon-intron-exon-intergenic-exon-intron-exon-intergenic-exon-intron-exon-intron-exon-exon-exon-intron-exon-intron-exon-intron-exon-intron-exon-intron-exon-intron-exon-exon-intron-exon-intron-exon-intron-exon-intron-exon-intron-exon-intron-exon-intron-exon-intergenic-exon-intron-exon-intergenic-intron-
NC_031978.2	27730553	27862935	gi|1434961994|ref|XM_019366507.2|	PREDICTED: Oreochromis niloticus transmembrane protein 254 (LOC109204777), mRNA	1	132413	132413	exon-exon-exon-intron-exon-intron-exon-intron-exon-intron-exon-intron-exon-intron-exon-intron-exon-exon-intron-exon-exon-intron-exon-exon-intron-exon-intron-exon-intergenic-exon-intron-exon-intergenic-exon-intron-exon-intron-exon-exon-exon-intron-exon-intron-exon-intron-exon-intron-exon-intron-exon-intron-exon-exon-intron-exon-intron-exon-intron-exon-intron-exon-intron-exon-intron-exon-intron-exo…
NC_031978.2	27720957	27850071	gi|1434961994|ref|XM_019366507.2|	PREDICTED: Oreochromis niloticus transmembrane protein 254 (LOC109204777), mRNA	1	129145	129145	exon-intron-exon-exon-intron-exon-intron-exon-intron-exon-intron-exon-intron-exon-intergenic-exon-intron-exon-intron-exon-exon-exon-intron-exon-intron-exon-intron-exon-intron-exon-intron-exon-intron-exon-intron-exon-exon-intron-exon-exon-intron-exon-exon-intron-exon-intron-exon-intergenic-exon-intron-exon-intergenic-exon-intron-exon-intron-exon-exon-exon-intron-exon-intron-exon-intron-exon-intron…
NC_031978.2	27720749	27841700	gi|1434961994|ref|XM_019366507.2|	PREDICTED: Oreochromis niloticus transmembrane protein 254 (LOC109204777), mRNA	1	120982	120982	exon-intron-exon-intron-exon-exon-intron-exon-intron-exon-intron-exon-intron-exon-intron-exon-intergenic-exon-intron-exon-intron-exon-exon-exon-intron-exon-intron-exon-intron-exon-intron-exon-intron-exon-intron-exon-intron-exon-exon-intron-exon-exon-intron-exon-exon-intron-exon-intron-exon-intergenic-exon-intron-exon-intergenic-exon-intron-exon-intron-exon-exon-exon-intron-exon-intron-intron-inte…
NC_031978.2	25214297	25216302	gi|1434961924|ref|XM_019366502.2|	PREDICTED: Oreochromis niloticus LRR binding FLII interacting protein 2 (lrrfip2), transcript variant X10, mRNA	1	2036	2036	exon-intron-exon-exon-intron-exon-intron-exon-intron-exon-intron-
NC_031978.2	23864359	23867766	gi|584026337|ref|XM_006807683.1|	PREDICTED: Neolamprologus brichardi disrupted in schizophrenia 1 protein-like (LOC102797615), mRNA	1	3438	3438	exon-intron-exon-intron-exon-
NC_031978.2	22496226	22506504	gi|1434963197|ref|XM_019366421.2|	PREDICTED: Oreochromis niloticus MAD2L1 binding protein (mad2l1bp), transcript variant X2, mRNA	1	10309	10309	exon-intron-exon-intron-exon-intron-exon-intron-exon-intron-exon-exon-exon-intron-exon-intron-exon-exon-intron-exon-intron-exon-intron-exon-
NC_031978.2	21822924	21854645	gi|1434896451|ref|XM_019353736.2|	PREDICTED: Oreochromis niloticus myosin-7-like (LOC109198089), mRNA	1	31752	31752	exon-exon-intron-exon-exon-intron-exon-intron-exon-intron-exon-intron-exon-intron-exon-intron-exon-exon-intron-exon-intron-exon-intron-intron-
NC_031978.2	19601556	19601690	gi|1110892550|ref|XM_003440993.3|	PREDICTED: Oreochromis niloticus kelch like family member 31 (klhl31), mRNA	1	165	165	exon-
NC_031978.2	102602	105225	gi|118495715|dbj|AB270897.1|	Oreochromis niloticus MHC class IA antigen UBA1, UBA2, UAA1 genes, partial cds, UAA3 and UAA2 pseudogenes, UAA4, UAA5 and UAA6 pseudogene fragments	1	2650	2650	exon-intron-exon-
NC_031978.2	10245688	10256166	gi|61097721|emb|AJ889574.1|	Oreochromis mossambicus partial vtg gene for vitellogenin, promoter and exon 1	1	10509	10509	exon-intron-exon-intron-exon-intron-exon-intron-exon-intron-exon-intron-exon-intron-exon-intron-exon-intron-exon-intron-exon-intron-exon-intron-exon-
NC_031978.2	10237859	10251925	gi|61097721|emb|AJ889574.1|	Oreochromis mossambicus partial vtg gene for vitellogenin, promoter and exon 1	1	14097	14097	exon-intron-exon-intron-exon-exon-intron-exon-intron-exon-intron-exon-intron-exon-intron-exon-intron-exon-intron-exon-intron-
NC_031978.2	10233147	10250619	gi|61097721|emb|AJ889574.1|	Oreochromis mossambicus partial vtg gene for vitellogenin, promoter and exon 1	1	17503	17503	exon-intron-exon-intron-exon-intron-exon-intron-exon-intron-exon-exon-intron-exon-intron-exon-intron-exon-intron-exon-intron-
NC_031977.2	9813835	9883111	gi|1434956867|ref|XM_019365555.2|	PREDICTED: Oreochromis niloticus glutathione hydrolase 5 proenzyme (LOC102081842), transcript variant X6, mRNA	1	69305	69305	exon-exon-intron-exon-intron-exon-intron-exon-intron-exon-intron-exon-intron-exon-intergenic-exon-exon-intron-exon-intron-exon-intergenic-exon-intron-exon-intron-exon-intron-exon-intron-exon-intron-exon-intron-exon-intron-exon-intron-exon-intron-exon-exon-intron-exon-intron-exon-intergenic-exon-intron-exon-intergenic-exon-intron-exon-intron-exon-intron-exon-intron-exon-intergenic-intron-exon-intr…
NC_031977.2	8572124	8574599	gi|1434959564|ref|XM_003445575.5|	PREDICTED: Oreochromis niloticus musashi RNA binding protein 1 (msi1), transcript variant X3, mRNA	1	2504	2504	intron-exon-intron-exon-intron-exon-intron-exon-
NC_031977.2	37920563	37921585	gi|1434958029|ref|XM_013264273.3|	PREDICTED: Oreochromis niloticus far upstream element-binding protein 3 (LOC100704289), transcript variant X3, mRNA	1	1053	1053	exon-intron-exon-intron-exon-
NC_031977.2	37082865	37084661	gi|1434956783|ref|XM_025911905.1|	PREDICTED: Oreochromis niloticus protein FAM160B2 (LOC100711782), transcript variant X3, mRNA	1	1827	1827	exon-intron-exon-intron-exon-intron-exon-intron-exon-intron-exon-intron-exon-intron-exon-
NC_031977.2	36639263	36742723	gi|1434958447|ref|XM_019365422.2|	PREDICTED: Oreochromis niloticus GTPase IMAP family member 8 (LOC100703505), transcript variant X12, mRNA	1	103491	103491	exon-exon-exon-exon-intergenic-exon-intron-exon-exon-intron-exon-exon-intron-exon-exon-intron-exon-exon-exon-exon-exon-intron-exon-exon-intron-exon-exon-intron-intron-intergenic-
NC_031977.2	32797485	32803686	gi|1434959627|ref|XM_003444520.5|	PREDICTED: Oreochromis niloticus SH2 domain-containing protein 3C (LOC100691262), transcript variant X2, mRNA	1	6232	6232	exon-intron-exon-intron-exon-intron-exon-exon-intergenic-
NC_031977.2	32567705	32752957	gi|118495715|dbj|AB270897.1|	Oreochromis niloticus MHC class IA antigen UBA1, UBA2, UAA1 genes, partial cds, UAA3 and UAA2 pseudogenes, UAA4, UAA5 and UAA6 pseudogene fragments	1	185283	185283	exon-exon-exon-intron-exon-intron-exon-intron-exon-exon-intergenic-exon-intron-exon-intron-exon-intergenic-exon-intron-exon-intron-exon-exon-exon-intron-exon-exon-intron-intergenic-exon-intron-exon-exon-intron-exon-intron-exon-intron-exon-intergenic-exon-intron-exon-exon-exon-intron-exon-intron-exon-intron-exon-intron-exon-intron-exon-intron-exon-exon-intron-exon-intron-exon-intergenic-exon-intro…
NC_031977.2	30892680	30896142	gi|930774176|ref|XM_005952579.2|	PREDICTED: Haplochromis burtoni calcium/calmodulin-dependent protein kinase type II subunit beta-like (LOC102306429), mRNA	1	3493	3493	exon-intron-exon-intron-exon-intron-exon-intron-exon-
NC_031977.2	30864209	30896142	gi|930774176|ref|XM_005952579.2|	PREDICTED: Haplochromis burtoni calcium/calmodulin-dependent protein kinase type II subunit beta-like (LOC102306429), mRNA	1	31964	31964	exon-exon-intron-exon-intron-exon-intron-exon-intron-exon-exon-exon-intron-exon-intron-exon-intron-exon-intron-exon-intron-exon-intron-exon-intron-intron-
NC_031977.2	19903552	19925237	gi|1434957325|ref|XM_019365324.2|	PREDICTED: Oreochromis niloticus vacuolar protein sorting 13 homolog A (vps13a), transcript variant X3, mRNA	1	21716	21716	exon-intron-exon-intron-exon-exon-exon-intron-exon-intron-exon-intron-exon-intron-exon-intron-exon-intron-exon-exon-exon-intron-exon-exon-intron-exon-intron-exon-intron-exon-intron-exon-intron-intron-
NC_031977.2	19508827	19509068	gi|1434957275|ref|XM_005473417.4|	PREDICTED: Oreochromis niloticus ubiquitin-associated protein 2 (LOC100696291), transcript variant X4, mRNA	1	272	272	exon-intron-exon-
NC_031977.2	17061244	17183931	gi|118495715|dbj|AB270897.1|	Oreochromis niloticus MHC class IA antigen UBA1, UBA2, UAA1 genes, partial cds, UAA3 and UAA2 pseudogenes, UAA4, UAA5 and UAA6 pseudogene fragments	1	122718	122718	exon-intron-exon-intron-exon-intron-exon-intergenic-exon-exon-intron-exon-intron-exon-intron-exon-intron-exon-exon-intron-exon-exon-intron-exon-intron-exon-intron-exon-exon-intron-exon-exon-intron-exon-intron-exon-intron-intron-exon-intron-exon-intron-exon-intron-exon-intron-exon-exon-intron-exon-intron-exon-intron-exon-intron-exon-intron-exon-intron-exon-intron-exon-intron-exon-intron-exon-intro…
NC_031977.2	17049067	17182338	gi|118495715|dbj|AB270897.1|	Oreochromis niloticus MHC class IA antigen UBA1, UBA2, UAA1 genes, partial cds, UAA3 and UAA2 pseudogenes, UAA4, UAA5 and UAA6 pseudogene fragments	1	133302	133302	exon-intron-exon-intron-exon-intron-exon-exon-intron-exon-intron-exon-intron-exon-intron-exon-intergenic-exon-exon-intron-exon-intron-exon-intron-exon-intron-exon-exon-intron-exon-exon-intron-exon-intron-exon-intron-exon-exon-intron-exon-exon-intron-exon-intron-exon-intron-intron-exon-intron-exon-intron-exon-intron-exon-intron-exon-exon-intron-exon-intron-exon-intron-exon-intron-exon-intron-exon-…
NC_031977.2	16959781	16969383	gi|583977719|ref|XM_006784143.1|	PREDICTED: Neolamprologus brichardi collagen type IV alpha-3-binding protein-like (LOC102800035), transcript variant X3, mRNA	1	9633	9633	exon-intron-exon-intron-exon-intron-exon-intron-exon-intergenic-exon-intron-exon-intron-exon-intron-exon-
NC_031977.2	15722348	15722913	gi|930735982|ref|XM_014333732.1|	PREDICTED: Haplochromis burtoni rho-related BTB domain-containing protein 2-like (LOC102296660), transcript variant X6, mRNA	1	596	596	exon-intron-exon-
NC_031976.2	95036	95722	gi|1434954410|ref|XR_003222178.1|	PREDICTED: Oreochromis niloticus centrosomal protein 162 (cep162), transcript variant X11, misc_RNA	1	711	711	exon-intron-exon-
NC_031976.2	7393547	7394740	gi|1434955270|ref|XM_025911626.1|	PREDICTED: Oreochromis niloticus pollen-specific leucine-rich repeat extensin-like protein 1 (LOC100695418), transcript variant X3, mRNA	1	1222	1222	exon-intron-exon-intron-exon-intron-exon-
NC_031976.2	4617931	4618143	gi|1434952765|ref|XM_013266543.3|	PREDICTED: Oreochromis niloticus SNF related kinase (snrk), transcript variant X4, mRNA	1	241	241	exon-
NC_031976.2	4608763	4618143	gi|118495715|dbj|AB270897.1|	Oreochromis niloticus MHC class IA antigen UBA1, UBA2, UAA1 genes, partial cds, UAA3 and UAA2 pseudogenes, UAA4, UAA5 and UAA6 pseudogene fragments	1	9409	9409	exon-intron-exon-
NC_031976.2	4314381	4316945	gi|1434952685|ref|XM_005463992.4|	PREDICTED: Oreochromis niloticus transforming growth factor beta 2 (tgfb2), transcript variant X1, mRNA	1	2593	2593	exon-intron-exon-intron-exon-intron-exon-intron-exon-exon-
NC_031976.2	38965513	38985217	gi|28849242|dbj|AB104861.1|	Oreochromis niloticus GnRH1 gene for seabream-type gonadotropin-releasing hormone precursor, complete cds	1	19735	19735	exon-intron-exon-intron-exon-exon-intron-exon-intron-exon-intron-exon-intron-exon-intron-exon-intron-exon-intron-exon-intron-
NC_031976.2	38965231	39003520	gi|28849242|dbj|AB104861.1|	Oreochromis niloticus GnRH1 gene for seabream-type gonadotropin-releasing hormone precursor, complete cds	1	38320	38320	exon-intron-exon-intron-exon-intron-exon-exon-intron-exon-intron-exon-intron-exon-intron-exon-intron-exon-intron-exon-intron-exon-intron-exon-intron-exon-intron-exon-intron-exon-exon-intron-exon-intron-exon-intron-exon-intron-exon-intron-exon-intron-exon-intron-exon-intron-exon-intron-exon-intron-exon-intron-exon-intron-exon-intron-exon-intron-exon-intron-intergenic-
NC_031976.2	37510836	37639458	gi|1434953489|ref|XM_019364412.2|	PREDICTED: Oreochromis niloticus gamma-aminobutyric acid type B receptor subunit 2 (LOC109204139), transcript variant X2, mRNA	1	128653	128653	exon-intron-exon-intron-exon-intron-exon-intron-exon-intron-exon-intron-exon-exon-intron-exon-intron-exon-intron-exon-intron-exon-intron-exon-intron-exon-exon-exon-intron-exon-exon-intron-exon-intron-exon-intron-exon-intron-exon-intron-exon-intron-exon-intron-exon-intergenic-exon-intron-exon-intron-exon-intron-exon-intron-exon-intron-exon-intron-exon-intron-exon-intron-exon-exon-intron-exon-intro…
NC_031976.2	37510328	37638057	gi|1434953489|ref|XM_019364412.2|	PREDICTED: Oreochromis niloticus gamma-aminobutyric acid type B receptor subunit 2 (LOC109204139), transcript variant X2, mRNA	1	127760	127760	exon-intron-exon-intron-exon-intron-exon-intron-exon-intron-exon-intron-exon-intron-exon-intron-exon-exon-intron-exon-intron-exon-intron-exon-intron-exon-intron-exon-intron-exon-exon-exon-intron-exon-exon-intron-exon-intron-exon-intron-exon-intron-exon-intron-exon-intron-exon-intron-exon-intergenic-exon-intron-exon-intron-exon-intron-exon-intron-exon-intron-exon-intron-exon-intron-exon-intron-exo…
NC_031976.2	37495749	37632186	gi|1434953489|ref|XM_019364412.2|	PREDICTED: Oreochromis niloticus gamma-aminobutyric acid type B receptor subunit 2 (LOC109204139), transcript variant X2, mRNA	1	136468	136468	exon-intron-exon-exon-intron-exon-intron-exon-intron-exon-intron-exon-intron-exon-intron-exon-intron-exon-intron-exon-intron-exon-intron-exon-intron-exon-exon-intron-exon-intron-exon-intron-exon-intron-exon-intron-exon-intron-exon-exon-exon-intron-exon-exon-intron-exon-intron-exon-intron-exon-intron-exon-intron-exon-intron-exon-intron-exon-intergenic-exon-intron-exon-intron-exon-intron-exon-intro…
NC_031976.2	37495602	37628192	gi|1434953489|ref|XM_019364412.2|	PREDICTED: Oreochromis niloticus gamma-aminobutyric acid type B receptor subunit 2 (LOC109204139), transcript variant X2, mRNA	1	132621	132621	exon-intron-exon-intron-exon-exon-intron-exon-intron-exon-intron-exon-intron-exon-intron-exon-intron-exon-intron-exon-intron-exon-intron-exon-intron-exon-intron-exon-exon-intron-exon-intron-exon-intron-exon-intron-exon-intron-exon-intron-exon-exon-exon-intron-exon-exon-intron-exon-intron-exon-intron-exon-intron-exon-intron-exon-intron-exon-intron-exon-intergenic-exon-intron-exon-intron-exon-intro…
NC_031976.2	36846457	36851301	gi|1468864578|ref|XM_026185832.1|	PREDICTED: Astatotilapia calliptera membrane-spanning 4-domains subfamily A member 4A-like (LOC113032754), transcript variant X3, mRNA	1	4875	4875	exon-intron-exon-intron-exon-exon-exon-exon-intron-exon-intergenic-exon-intron-
NC_031976.2	36016595	36018688	gi|1434954002|ref|XM_013275037.3|	PREDICTED: Oreochromis niloticus lamin A/C (lmna), transcript variant X2, mRNA	1	2124	2124	exon-intron-exon-
NC_031976.2	35903742	35929711	gi|723802023|tpe|BN000676.1|	TPA: Xenopus tropicalis Tc1-like transposon, Beagle	1	26000	26000	exon-exon-intron-exon-intron-exon-intron-exon-intron-exon-intron-exon-intergenic-
NC_031976.2	35845298	35861191	gi|118495715|dbj|AB270897.1|	Oreochromis niloticus MHC class IA antigen UBA1, UBA2, UAA1 genes, partial cds, UAA3 and UAA2 pseudogenes, UAA4, UAA5 and UAA6 pseudogene fragments	1	15924	15924	exon-intron-exon-exon-intron-exon-intron-exon-intron-exon-intron-exon-intron-exon-intron-exon-intergenic-
NC_031976.2	31061326	31077467	gi|1434956595|ref|XM_019364686.2|	PREDICTED: Oreochromis niloticus cathepsin S (LOC100695758), mRNA	1	16172	16172	exon-intron-exon-exon-intron-exon-intron-exon-intergenic-exon-intron-exon-intron-exon-intron-exon-intron-exon-intergenic-exon-intron-exon-intron-exon-intron-
NC_031976.2	29817506	29873312	gi|1434954840|ref|XM_025911560.1|	PREDICTED: Oreochromis niloticus proline-rich receptor-like protein kinase PERK9 (LOC112848208), transcript variant X1, mRNA	1	55837	55837	exon-intron-exon-intron-exon-intron-exon-exon-intergenic-exon-intron-exon-intron-exon-intron-exon-intron-exon-exon-exon-intron-exon-intron-exon-intron-exon-intron-exon-intron-exon-intron-exon-intron-intergenic-exon-intron-intergenic-exon-
NC_031976.2	28869754	28877287	gi|1434953019|ref|XM_025911201.1|	PREDICTED: Oreochromis niloticus sialic acid-binding Ig-like lectin 14 (LOC112848128), mRNA	1	7564	7564	exon-intron-exon-intron-exon-intron-exon-intron-exon-exon-intron-exon-exon-
NC_031976.2	28432240	28465636	gi|1434953037|ref|XM_025911210.1|	PREDICTED: Oreochromis niloticus SIGLEC family-like protein 1 (LOC109204120), mRNA	1	33427	33427	intergenic-exon-intron-exon-intron-exon-intergenic-exon-intron-exon-exon-intron-exon-intron-exon-intergenic-exon-intron-exon-intron-exon-intron-exon-intron-exon-intron-exon-intron-exon-intron-exon-intron-exon-intron-exon-intron-exon-intron-exon-intron-intron-
NC_031976.2	28413474	28430037	gi|1434953049|ref|XM_019364372.2|	PREDICTED: Oreochromis niloticus B-cell receptor CD22 (LOC109204119), mRNA	1	16594	16594	exon-intron-exon-intron-exon-intron-exon-intron-exon-intron-exon-intron-exon-intergenic-exon-intron-exon-intron-exon-intron-exon-intron-exon-intron-exon-intron-exon-intron-exon-exon-intergenic-
NC_031976.2	27995918	27996070	gi|542234515|ref|XR_266608.1|	NOT ASSIGNED	1	183	183	exon-
NC_031976.2	25103290	25125810	gi|1434954484|ref|XM_019364468.2|	PREDICTED: Oreochromis niloticus multiple epidermal growth factor-like domains protein 8 (LOC102081177), mRNA	1	22551	22551	exon-intron-exon-intron-exon-intron-exon-intron-exon-intron-exon-intron-exon-intron-exon-intron-exon-intron-exon-intron-exon-intron-exon-intron-exon-intron-exon-intron-exon-intergenic-exon-intron-exon-intron-exon-intron-exon-intron-exon-intron-exon-exon-intron-exon-intron-exon-intron-exon-intron-exon-intron-exon-intron-exon-intron-exon-intron-exon-intron-exon-intron-exon-intron-exon-intron-exon-i…
NC_031976.2	25100146	25122887	gi|1434954484|ref|XM_019364468.2|	PREDICTED: Oreochromis niloticus multiple epidermal growth factor-like domains protein 8 (LOC102081177), mRNA	1	22772	22772	intron-exon-intron-exon-intron-exon-intron-exon-intron-exon-intron-exon-intron-exon-intron-exon-intron-exon-intron-exon-intron-exon-intron-exon-intron-exon-intron-exon-intron-exon-intron-exon-intron-exon-intron-exon-intron-exon-intron-exon-intron-exon-intron-exon-intergenic-exon-intron-exon-intron-exon-intron-exon-intron-exon-intron-exon-exon-intron-exon-intron-exon-intron-exon-intron-exon-intron…
NC_031976.2	25098042	25119917	gi|1434954484|ref|XM_019364468.2|	PREDICTED: Oreochromis niloticus multiple epidermal growth factor-like domains protein 8 (LOC102081177), mRNA	1	21906	21906	exon-intron-exon-intron-exon-intron-exon-intron-exon-intron-intron-exon-intron-exon-intron-exon-intron-exon-intron-exon-intron-exon-intron-exon-intron-exon-intron-exon-intron-exon-intron-exon-intron-exon-intron-exon-intron-exon-intron-exon-intron-exon-intron-exon-intron-exon-intron-exon-intron-exon-intron-exon-intron-exon-intergenic-exon-intron-exon-intron-exon-intron-exon-intron-exon-intron-exon…
NC_031976.2	23512523	23584024	gi|1434955997|ref|XR_002063777.2|	PREDICTED: Oreochromis niloticus basement membrane-specific heparan sulfate proteoglycan core protein (LOC109204210), transcript variant X6, misc_RNA	1	71532	71532	exon-intron-exon-intron-exon-intron-exon-intron-exon-intron-exon-intron-exon-intron-exon-intron-exon-intron-exon-intron-exon-intron-intergenic-exon-intron-exon-intron-exon-intron-exon-exon-intergenic-exon-exon-exon-exon-intron-exon-intron-exon-intron-exon-intron-exon-exon-intron-exon-exon-exon-exon-exon-intron-exon-exon-exon-exon-exon-exon-exon-exon-intron-exon-exon-intron-exon-intron-exon-intron…
NC_031976.2	23376409	23376474	gi|1434954955|ref|XM_003450585.5|	PREDICTED: Oreochromis niloticus triosephosphate isomerase B (tpi), mRNA	1	96	96	exon-
NC_031976.2	23108419	23108528	gi|1434955899|ref|XM_005455438.3|	PREDICTED: Oreochromis niloticus glyceraldehyde-3-phosphate dehydrogenase (gapdh), mRNA	1	140	140	exon-
NC_031976.2	18017102	18048978	gi|1381434559|ref|XM_024802689.1|	PREDICTED: Maylandia zebra transposon Tf2-1 polyprotein (LOC106675890), mRNA	1	31907	31907	exon-intron-exon-intron-exon-intron-exon-exon-intron-exon-intron-exon-intron-exon-intron-exon-intron-exon-intron-exon-intron-exon-intron-exon-intron-exon-intergenic-exon-intron-exon-intron-exon-intron-exon-intron-exon-intron-exon-intron-exon-intron-exon-intron-exon-intron-exon-intron-exon-intron-exon-intron-exon-intron-exon-exon-exon-intron-exon-intron-exon-intron-exon-intron-exon-intron-exon-int…
NC_031976.2	18011223	18047222	gi|118495715|dbj|AB270897.1|	Oreochromis niloticus MHC class IA antigen UBA1, UBA2, UAA1 genes, partial cds, UAA3 and UAA2 pseudogenes, UAA4, UAA5 and UAA6 pseudogene fragments	1	36030	36030	exon-intron-exon-intron-exon-intron-exon-intron-exon-intron-exon-intron-exon-intron-exon-intron-exon-intron-exon-intron-exon-exon-intron-exon-intron-exon-intron-exon-intron-exon-intron-exon-intron-exon-intron-exon-intron-exon-intron-exon-intergenic-exon-intron-exon-intron-exon-intron-exon-intron-exon-intron-exon-intron-exon-intron-exon-intron-exon-intron-exon-intron-exon-intron-exon-intron-exon-i…
NC_031976.2	1773467	1774455	gi|1434955294|ref|XM_013268385.3|	PREDICTED: Oreochromis niloticus phosphatidylinositide phosphatase SAC1-A (LOC100707989), transcript variant X4, mRNA	1	1017	1017	exon-intron-exon-exon-intron-exon-
NC_031976.2	16591258	16641479	gi|118495715|dbj|AB270897.1|	Oreochromis niloticus MHC class IA antigen UBA1, UBA2, UAA1 genes, partial cds, UAA3 and UAA2 pseudogenes, UAA4, UAA5 and UAA6 pseudogene fragments	1	50252	50252	exon-exon-exon-intron-exon-intron-exon-intron-exon-intron-exon-intron-exon-intron-exon-intron-exon-intron-exon-exon-intron-exon-intron-exon-intron-exon-exon-intron-exon-intron-exon-intron-exon-intron-exon-intron-exon-intron-exon-intron-intron-intron-intron-
NC_031976.2	16552335	16621299	gi|118495715|dbj|AB270897.1|	Oreochromis niloticus MHC class IA antigen UBA1, UBA2, UAA1 genes, partial cds, UAA3 and UAA2 pseudogenes, UAA4, UAA5 and UAA6 pseudogene fragments	1	68995	68995	exon-intron-exon-intron-exon-exon-exon-intron-exon-exon-exon-intron-exon-intron-exon-intron-exon-intron-exon-intron-exon-intron-exon-intron-exon-intron-exon-exon-intron-exon-intron-exon-intron-intron-intron-intron-
NC_031976.2	13612918	13625912	gi|1434953210|ref|XM_025911261.1|	PREDICTED: Oreochromis niloticus plectin (LOC100704602), transcript variant X27, mRNA	1	13025	13025	exon-intron-exon-intron-exon-intron-exon-intron-exon-intron-exon-intron-exon-intron-exon-intron-exon-exon-intron-exon-intron-exon-intron-exon-intron-exon-intron-exon-intron-exon-intron-exon-intron-exon-intron-exon-intron-exon-exon-intron-exon-intron-exon-intron-exon-intron-
NC_031976.2	11469175	11480025	gi|1468863578|ref|XM_026185482.1|	PREDICTED: Astatotilapia calliptera nuclear receptor coactivator 7-like (LOC113032523), mRNA	1	10881	10881	exon-intron-exon-intron-exon-intron-exon-intron-exon-intron-exon-
NC_031976.2	10373687	10376021	gi|1434954124|ref|XM_005450575.3|	PREDICTED: Oreochromis niloticus growth factor receptor-bound protein 10 (LOC100703704), transcript variant X5, mRNA	1	2365	2365	exon-intron-exon-exon-
NC_031975.2	6291595	6320220	gi|1434952605|ref|XM_003456161.5|	PREDICTED: Oreochromis niloticus beta-glucuronidase (LOC100708292), mRNA	1	28654	28654	exon-intron-exon-intron-exon-intron-exon-intron-exon-intron-exon-intron-exon-intron-exon-intron-exon-intron-exon-intron-exon-intron-exon-exon-intron-exon-intron-exon-intron-exon-intron-intron-
NC_031975.2	531120	549980	gi|157429631|gb|EF526075.2|	Astatotilapia burtoni BAC 99M12 Gsh2 (gsh2), Pdgfra (pdgfra), and Kita (kita) genes, complete cds; Kdrb (kdrb) gene, partial cds; and Clock (clock) gene, complete cds	1	18887	18887	exon-intron-exon-intron-exon-exon-intron-
NC_031975.2	5254495	5267611	gi|282765727|gb|FJ859721.1|	Oreochromis niloticus ATP-binding cassette subfamily G member 1 transcription variant 2 (ABCG1) mRNA, complete cds	1	13145	13145	exon-intron-exon-intron-exon-exon-intron-exon-intron-
NC_031975.2	24586874	24586999	gi|1434949914|ref|XM_019363710.2|	PREDICTED: Oreochromis niloticus ubiquitin specific peptidase 28 (usp28), transcript variant X4, mRNA	1	156	156	exon-
NC_031975.2	19390394	19392880	gi|923794682|ref|XM_005727934.2|	PREDICTED: Pundamilia nyererei cytoplasmic polyadenylation element binding protein 4 (cpeb4), mRNA	1	2517	2517	exon-intron-exon-intron-exon-intron-exon-intron-exon-
NC_031975.2	11473153	11486479	gi|499026441|ref|XM_004563907.1|	PREDICTED: Maylandia zebra TATA-box binding protein associated factor 6 (taf6), mRNA	1	13357	13357	exon-intron-exon-intron-exon-intron-exon-intron-exon-intron-exon-intron-exon-intergenic-exon-intron-exon-intron-exon-intron-exon-intron-exon-exon-intron-
NC_031975.2	11139723	11158453	gi|1434952238|ref|XM_019364003.2|	PREDICTED: Oreochromis niloticus E3 ubiquitin-protein ligase RNF167 (LOC100707667), transcript variant X3, mRNA	1	18761	18761	exon-intron-exon-intron-exon-exon-intron-exon-intergenic-exon-exon-intron-exon-intron-exon-intron-exon-intron-intron-
NC_031975.2	11138886	11154604	gi|1434952238|ref|XM_019364003.2|	PREDICTED: Oreochromis niloticus E3 ubiquitin-protein ligase RNF167 (LOC100707667), transcript variant X3, mRNA	1	15749	15749	exon-intron-exon-intron-exon-intron-exon-intron-exon-intron-exon-intron-exon-exon-intron-exon-intergenic-exon-intron-
NC_031974.2	8574640	8714894	gi|1468883830|ref|XM_026143023.1|	PREDICTED: Astatotilapia calliptera zinc finger MYM-type protein 1-like (LOC113006830), mRNA	1	140283	140283	exon-exon-exon-exon-intron-exon-intron-exon-intron-exon-intron-exon-intron-exon-intron-exon-exon-intron-exon-intron-exon-exon-intron-exon-intron-exon-exon-intron-exon-intergenic-exon-exon-exon-exon-intron-exon-intron-exon-intron-exon-intron-exon-exon-intron-exon-intron-exon-intron-exon-exon-exon-intergenic-exon-intron-exon-intron-exon-intron-exon-intergenic-intergenic-intron-intergenic-intergenic…
NC_031974.2	6124059	6248461	gi|1434948028|ref|XM_019352932.2|	PREDICTED: Oreochromis niloticus zinc finger protein 239 (LOC102079429), transcript variant X1, mRNA	1	124431	124431	exon-intron-exon-exon-intergenic-exon-intron-exon-exon-intron-exon-exon-exon-intron-exon-exon-intron-exon-intergenic-exon-intron-exon-exon-intron-exon-exon-intron-exon-intron-exon-intergenic-exon-exon-exon-exon-intron-exon-intron-exon-intergenic-exon-intron-exon-exon-exon-intron-exon-intron-intergenic-intergenic-intergenic-intron-intergenic-intron-
NC_031974.2	2005234	2032824	gi|118495715|dbj|AB270897.1|	Oreochromis niloticus MHC class IA antigen UBA1, UBA2, UAA1 genes, partial cds, UAA3 and UAA2 pseudogenes, UAA4, UAA5 and UAA6 pseudogene fragments	1	27619	27619	exon-intron-exon-exon-exon-intergenic-exon-intergenic-intron-
NC_031974.2	18961552	19001240	gi|1434946779|ref|XM_005471898.3|	PREDICTED: Oreochromis niloticus trichohyalin-like (LOC102082957), mRNA	1	39719	39719	intron-exon-intron-exon-intron-exon-intron-exon-intron-exon-intron-exon-exon-exon-exon-exon-exon-exon-exon-intron-exon-intron-exon-exon-exon-intron-exon-intron-exon-intron-exon-intron-exon-exon-intron-exon-intron-exon-exon-intron-exon-intron-exon-intergenic-exon-intron-exon-intron-exon-intron-exon-intron-exon-intron-exon-intron-exon-intron-exon-intron-exon-intron-exon-intron-exon-intron-exon-intr…
NC_031974.2	17041291	17043827	gi|1434948410|ref|XM_005448919.4|	PREDICTED: Oreochromis niloticus DLG associated protein 1 (dlgap1), transcript variant X4, mRNA	1	2567	2567	exon-intron-exon-intron-exon-
NC_031974.2	15912796	15997368	gi|118495715|dbj|AB270897.1|	Oreochromis niloticus MHC class IA antigen UBA1, UBA2, UAA1 genes, partial cds, UAA3 and UAA2 pseudogenes, UAA4, UAA5 and UAA6 pseudogene fragments	1	84603	84603	exon-intron-exon-intron-exon-intron-exon-intron-exon-intron-exon-intron-exon-exon-intron-exon-intron-exon-intron-exon-intron-exon-intron-exon-intron-exon-intron-exon-intron-exon-exon-intron-exon-intron-exon-intron-exon-intron-exon-exon-intron-exon-intron-exon-intron-exon-intron-exon-intergenic-exon-intron-exon-intron-exon-intron-exon-exon-intron-exon-intron-exon-intron-exon-intergenic-exon-intron…
NC_031974.2	15908827	15995809	gi|118495715|dbj|AB270897.1|	Oreochromis niloticus MHC class IA antigen UBA1, UBA2, UAA1 genes, partial cds, UAA3 and UAA2 pseudogenes, UAA4, UAA5 and UAA6 pseudogene fragments	1	87013	87013	intron-exon-intron-exon-intron-exon-intron-exon-intron-exon-intron-exon-intron-exon-intron-exon-intron-exon-intron-exon-exon-intron-exon-intron-exon-intron-exon-intron-exon-intron-exon-intron-exon-intron-exon-intron-exon-exon-intron-exon-intron-exon-intron-exon-intron-exon-exon-intron-exon-intron-exon-intron-exon-intron-exon-intergenic-exon-intron-exon-intron-exon-intron-exon-exon-intron-exon-int…
NC_031974.2	15908594	15995598	gi|118495715|dbj|AB270897.1|	Oreochromis niloticus MHC class IA antigen UBA1, UBA2, UAA1 genes, partial cds, UAA3 and UAA2 pseudogenes, UAA4, UAA5 and UAA6 pseudogene fragments	1	87035	87035	exon-intron-intron-exon-intron-exon-intron-exon-intron-exon-intron-exon-intron-exon-intron-exon-intron-exon-intron-exon-intron-exon-exon-intron-exon-intron-exon-intron-exon-intron-exon-intron-exon-intron-exon-intron-exon-intron-exon-exon-intron-exon-intron-exon-intron-exon-intron-exon-exon-intron-exon-intron-exon-intron-exon-intron-exon-intergenic-exon-intron-exon-intron-exon-intron-exon-exon-int…
NC_031974.2	15897699	15985751	gi|118495715|dbj|AB270897.1|	Oreochromis niloticus MHC class IA antigen UBA1, UBA2, UAA1 genes, partial cds, UAA3 and UAA2 pseudogenes, UAA4, UAA5 and UAA6 pseudogene fragments	1	88083	88083	exon-intron-exon-intron-exon-intron-exon-intron-exon-intron-exon-intron-exon-intron-exon-intron-exon-intron-exon-intron-exon-intron-exon-intron-exon-intron-exon-exon-intron-exon-intron-exon-intron-exon-intron-exon-intron-exon-intron-intron-exon-intron-exon-intron-exon-intron-exon-intron-exon-intron-exon-intron-exon-intron-exon-intron-exon-intron-exon-exon-intron-exon-intron-exon-intron-exon-intro…
NC_031974.2	15590492	15659838	gi|1434948442|ref|XM_005448961.4|	PREDICTED: Oreochromis niloticus methyltransferase-like protein 4 (LOC100697483), transcript variant X2, mRNA	1	69377	69377	exon-intron-exon-intron-exon-intron-exon-intron-exon-intron-exon-intergenic-exon-exon-intron-exon-intron-exon-intron-exon-intron-exon-intron-exon-intron-exon-intron-exon-intergenic-exon-intron-exon-intron-exon-intron-exon-intron-exon-intron-exon-intron-exon-intron-exon-intron-exon-intron-exon-intron-exon-exon-intron-exon-intron-exon-intron-exon-intron-exon-intron-exon-intron-exon-intron-exon-intr…
NC_031974.2	15581757	15650546	gi|1434948442|ref|XM_005448961.4|	PREDICTED: Oreochromis niloticus methyltransferase-like protein 4 (LOC100697483), transcript variant X2, mRNA	1	68820	68820	exon-intron-exon-intron-exon-intron-exon-intron-exon-intron-exon-exon-intron-exon-exon-intron-exon-intron-exon-intron-exon-intron-exon-intron-exon-intron-exon-intron-exon-intron-exon-intron-exon-intergenic-exon-exon-intron-exon-intron-exon-intron-exon-intron-exon-intron-exon-intron-exon-intron-exon-intergenic-exon-intron-exon-intron-exon-intron-exon-intron-exon-intron-exon-intron-exon-intron-exon…
NC_031973.2	9903733	9905025	gi|1434943742|ref|XM_019362446.2|	PREDICTED: Oreochromis niloticus eukaryotic elongation factor 2 kinase (eef2k), transcript variant X8, mRNA	1	1321	1321	exon-intron-exon-intron-exon-intron-exon-
NC_031973.2	9897506	9902986	gi|1434943742|ref|XM_019362446.2|	PREDICTED: Oreochromis niloticus eukaryotic elongation factor 2 kinase (eef2k), transcript variant X8, mRNA	1	5509	5509	exon-exon-intron-exon-intron-exon-intron-exon-intron-exon-intron-exon-
NC_031973.2	7562132	7562185	gi|930724652|ref|XM_005913568.2|	PREDICTED: Haplochromis burtoni collagen alpha-1(I) chain-like (LOC102304089), transcript variant X2, mRNA	1	82	82	exon-
NC_031973.2	6541346	6542303	gi|1434944303|ref|XM_019362294.2|	PREDICTED: Oreochromis niloticus ankyrin-3 (LOC100703272), transcript variant X13, mRNA	1	986	986	exon-intron-exon-exon-
NC_031973.2	4820953	4828959	gi|927599563|gb|KT634745.1|	Neolamprologus pulcher voucher Matthew D. McGee:4405 ultra conserved element locus uce-375 genomic sequence	1	8035	8035	exon-exon-intron-exon-intron-exon-intron-exon-intron-exon-
NC_031973.2	4664930	4672518	gi|1434945945|ref|XM_025909900.1|	PREDICTED: Oreochromis niloticus microtubule-associated protein tau (LOC100696807), transcript variant X27, mRNA	1	7617	7617	exon-intron-exon-intron-exon-intron-exon-exon-intron-exon-intron-
NC_031973.2	28425174	28426156	gi|1434945067|ref|XR_269440.4|	PREDICTED: Oreochromis niloticus RFNG O-fucosylpeptide 3-beta-N-acetylglucosaminyltransferase (rfng), transcript variant X2, misc_RNA	1	1013	1013	exon-intron-exon-intron-exon-intron-exon-
NC_031973.2	26159330	26159830	gi|930737102|ref|XM_005923763.2|	PREDICTED: Haplochromis burtoni dual specificity mitogen-activated protein kinase kinase 4-like (LOC102293557), transcript variant X6, mRNA	1	531	531	exon-intron-exon-intron-exon-
NC_031973.2	25289302	25292744	gi|1434944139|ref|XM_019362085.2|	PREDICTED: Oreochromis niloticus C-Jun-amino-terminal kinase-interacting protein 4 (LOC100690161), transcript variant X3, mRNA	1	3473	3473	exon-intron-exon-intron-exon-intron-exon-
NC_031973.2	18834035	18835076	gi|1434944381|ref|XM_003438613.5|	PREDICTED: Oreochromis niloticus major facilitator superfamily domain-containing protein 1 (LOC100697574), transcript variant X1, mRNA	1	1072	1072	exon-intron-exon-
NC_031973.2	1854460	1854640	gi|1434945996|ref|XM_025909909.1|	NOT ASSIGNED	1	209	209	exon-exon-
NC_031973.2	17199041	17435863	gi|118495715|dbj|AB270897.1|	Oreochromis niloticus MHC class IA antigen UBA1, UBA2, UAA1 genes, partial cds, UAA3 and UAA2 pseudogenes, UAA4, UAA5 and UAA6 pseudogene fragments	1	236853	236853	exon-intron-exon-intron-exon-intron-exon-intron-exon-intron-exon-intron-exon-exon-intron-exon-intron-exon-exon-intron-exon-exon-intron-exon-intron-exon-intron-exon-intron-exon-intron-exon-intron-exon-intron-exon-intron-exon-intron-exon-intron-exon-intron-exon-intron-exon-intron-exon-intron-exon-intron-exon-intron-exon-intron-exon-intron-exon-intron-exon-intron-exon-intron-exon-intron-exon-intron-…
NC_031973.2	17197794	17524118	gi|118495715|dbj|AB270897.1|	Oreochromis niloticus MHC class IA antigen UBA1, UBA2, UAA1 genes, partial cds, UAA3 and UAA2 pseudogenes, UAA4, UAA5 and UAA6 pseudogene fragments	1	326355	326355	exon-intron-exon-intron-exon-intron-exon-intron-exon-intron-exon-intron-exon-intron-exon-intron-exon-intron-exon-intron-exon-intron-exon-exon-intron-exon-intron-exon-exon-intron-exon-exon-intron-exon-intron-exon-intron-exon-intron-exon-intron-exon-intron-exon-intron-exon-intron-exon-intron-exon-intron-exon-intron-exon-intron-exon-intron-exon-intron-exon-intron-exon-intron-exon-intron-exon-intron-…
NC_031973.2	17156219	17522030	gi|1434944023|ref|XM_019362654.2|	PREDICTED: Oreochromis niloticus integrin alpha-M (LOC106098356), mRNA	1	365842	365842	exon-intron-exon-intron-exon-intron-exon-intron-exon-intron-exon-intron-exon-intron-exon-intron-exon-intron-exon-intron-exon-intron-exon-intron-exon-intron-exon-intron-exon-intron-exon-intron-exon-intron-exon-exon-intron-exon-intron-exon-intron-exon-intron-exon-intron-exon-intron-exon-intron-exon-intron-exon-intron-exon-intron-exon-intron-exon-intron-exon-intron-exon-intron-exon-exon-intron-exon-…
NC_031973.2	17021741	17520998	gi|1434944023|ref|XM_019362654.2|	PREDICTED: Oreochromis niloticus integrin alpha-M (LOC106098356), mRNA	1	499288	499288	exon-intron-exon-intron-exon-intron-exon-intron-intron-exon-intron-exon-intron-exon-intron-exon-intron-exon-intron-exon-intron-exon-intron-exon-intron-exon-intron-exon-intron-exon-intron-exon-intron-exon-intron-exon-intron-exon-intron-exon-intergenic-exon-intron-exon-intron-exon-exon-intron-exon-exon-intron-exon-intron-exon-intron-exon-intron-exon-intron-exon-intron-exon-intron-exon-intron-exon-i…
NC_031973.2	16660948	16672699	gi|1059791593|gb|AH013711.2|	Oreochromis niloticus KLR3 (KLR3) gene, exons 2 through 7; KLR2 pseudogene, partial sequence; KLR1 gene, complete sequence; KLR4 (KLR4) gene, exons 2 through 7; KLR5 (KLR5) gene, exons 1 through 7; KLR6 and KLR7 pseudogenes, complete sequence; KLR9 (KLR10) pseudogene, exons 4 through 7; KLR8 pseudogene, partial sequence; KLR9 (KLR9) gene, exons 1 through 7; C-type lectin (CLECT2)-like protein gen…	1	11782	11782	exon-intron-exon-intron-exon-intron-exon-intron-exon-exon-intron-exon-intron-exon-intron-exon-intron-exon-intron-exon-intron-exon-intron-exon-intron-exon-intron-exon-intron-exon-intron-exon-intron-exon-exon-intron-exon-intron-exon-exon-intron-exon-intron-exon-intron-exon-intron-exon-intron-exon-intron-exon-intron-
NC_031973.2	16659461	16671438	gi|1059791593|gb|AH013711.2|	Oreochromis niloticus KLR3 (KLR3) gene, exons 2 through 7; KLR2 pseudogene, partial sequence; KLR1 gene, complete sequence; KLR4 (KLR4) gene, exons 2 through 7; KLR5 (KLR5) gene, exons 1 through 7; KLR6 and KLR7 pseudogenes, complete sequence; KLR9 (KLR10) pseudogene, exons 4 through 7; KLR8 pseudogene, partial sequence; KLR9 (KLR9) gene, exons 1 through 7; C-type lectin (CLECT2)-like protein gen…	1	12008	12008	exon-intron-exon-intron-exon-intron-exon-intron-exon-intron-exon-intron-exon-intron-exon-intron-exon-intron-exon-exon-intron-exon-intron-exon-intron-exon-intron-exon-intron-exon-intron-exon-intron-exon-intron-exon-intron-exon-intron-exon-intron-exon-intron-exon-exon-intron-exon-intron-exon-exon-intron-exon-intron-
NC_031973.2	16592971	16595187	gi|1434945134|ref|XM_019362622.2|	PREDICTED: Oreochromis niloticus MYC associated zinc finger protein (maz), transcript variant X1, mRNA	1	2247	2247	exon-exon-intron-exon-intron-exon-exon-
NC_031973.2	16447231	16447277	gi|923863343|ref|XM_013914954.1|	PREDICTED: Pundamilia nyererei sarcoplasmic/endoplasmic reticulum calcium ATPase 1 (LOC102214567), transcript variant X2, mRNA	1	77	77	exon-
NC_031973.2	16446879	16446972	gi|584022217|ref|XM_006805702.1|	PREDICTED: Neolamprologus brichardi sarcoplasmic/endoplasmic reticulum calcium ATPase 1-like (LOC102797408), transcript variant X2, mRNA	1	124	124	exon-
NC_031973.2	16444502	16444912	gi|1110957238|ref|XM_013266483.2|	PREDICTED: Oreochromis niloticus sarcoplasmic/endoplasmic reticulum calcium ATPase 1 (LOC100706607), transcript variant X2, mRNA	1	441	441	exon-intron-exon-
NC_031973.2	16440918	16441122	gi|1110957238|ref|XM_013266483.2|	PREDICTED: Oreochromis niloticus sarcoplasmic/endoplasmic reticulum calcium ATPase 1 (LOC100706607), transcript variant X2, mRNA	1	235	235	exon-intron-exon-
NC_031973.2	16440763	16441133	gi|1110957238|ref|XM_013266483.2|	PREDICTED: Oreochromis niloticus sarcoplasmic/endoplasmic reticulum calcium ATPase 1 (LOC100706607), transcript variant X2, mRNA	1	401	401	exon-intron-exon-intron-exon-
NC_031973.2	15959229	16031011	gi|1110957185|ref|XM_019362610.1|	PREDICTED: Oreochromis niloticus sterile alpha motif domain-containing protein 3 (LOC109203249), transcript variant X1, mRNA	1	71813	71813	exon-intron-exon-intron-exon-intron-exon-intron-exon-intron-exon-intron-exon-intron-exon-intron-exon-intron-exon-exon-exon-exon-exon-intron-exon-intron-exon-intron-exon-intron-exon-exon-intron-exon-intron-exon-intron-exon-exon-intron-exon-intron-exon-intron-exon-intron-exon-intron-exon-intron-exon-intron-exon-intron-exon-intron-exon-intron-exon-intron-exon-intron-exon-intron-exon-intron-exon-exon…
NC_031973.2	13461966	13465680	gi|55057188|emb|CR846318.1|	Takifugu rubripes DNA, highly conserved vertebrate non-coding sequence, element ID CNE214	1	3745	3745	exon-intron-exon-intron-exon-
NC_031972.2	9033630	9035959	gi|1434942082|ref|XM_005449455.4|	PREDICTED: Oreochromis niloticus myocyte-specific enhancer factor 2C (LOC100706088), transcript variant X5, mRNA	1	2358	2358	exon-intron-exon-
NC_031972.2	6448793	6460603	gi|723802023|tpe|BN000676.1|	TPA: Xenopus tropicalis Tc1-like transposon, Beagle	1	11839	11839	exon-intron-exon-intron-exon-intron-exon-intron-exon-intron-exon-intron-exon-intron-exon-intron-exon-intron-exon-intron-exon-intron-exon-exon-intron-exon-intron-exon-intron-exon-intron-exon-intron-exon-intron-exon-intron-exon-intron-exon-intergenic-exon-intron-exon-intron-
NC_031972.2	61245143	61245486	gi|1434936877|ref|XM_025908740.1|	PREDICTED: Oreochromis niloticus protein-methionine sulfoxide oxidase mical3a (LOC100695036), transcript variant X30, mRNA	1	374	374	exon-exon-
NC_031972.2	61040062	61047706	gi|1434936952|ref|XM_025908754.1|	PREDICTED: Oreochromis niloticus thromboxane-A synthase (LOC102078896), mRNA	1	7675	7675	exon-intron-exon-intron-exon-intron-exon-intron-exon-intron-exon-intron-exon-intron-exon-intron-exon-intron-exon-exon-intron-exon-intergenic-exon-intron-intron-exon-exon-
NC_031972.2	59895964	59991358	gi|118495715|dbj|AB270897.1|	Oreochromis niloticus MHC class IA antigen UBA1, UBA2, UAA1 genes, partial cds, UAA3 and UAA2 pseudogenes, UAA4, UAA5 and UAA6 pseudogene fragments	1	95425	95425	exon-intron-exon-intron-exon-intron-intron-exon-intron-exon-intron-exon-intron-exon-intron-exon-exon-intron-exon-intron-exon-intron-exon-exon-intron-exon-intron-exon-intron-exon-intron-intron-exon-intron-exon-intron-exon-intron-exon-intron-exon-intron-exon-intron-exon-exon-intron-exon-intron-exon-intron-exon-intron-exon-intron-exon-intron-exon-intron-exon-intron-exon-exon-intron-intergenic-exon-i…
NC_031972.2	56853671	56872104	gi|1468950906|ref|XM_026176362.1|	PREDICTED: Astatotilapia calliptera liver carboxylesterase 2-like (LOC113026994), mRNA	1	18464	18464	exon-intron-exon-intron-exon-intron-exon-intergenic-exon-intron-exon-intron-exon-intron-exon-intron-exon-intron-exon-intron-exon-intron-exon-intron-exon-intron-exon-intron-exon-intron-exon-intron-exon-intergenic-exon-exon-intron-exon-intron-exon-intron-intron-exon-intron-exon-intron-exon-intron-exon-intron-exon-exon-
NC_031972.2	56852776	56858830	gi|1468950906|ref|XM_026176362.1|	PREDICTED: Astatotilapia calliptera liver carboxylesterase 2-like (LOC113026994), mRNA	1	6085	6085	exon-intron-exon-intron-exon-intron-exon-intron-exon-intron-exon-intron-exon-intron-exon-intergenic-exon-intron-exon-intron-exon-intron-exon-intron-exon-
NC_031972.2	55841582	55849644	gi|548444545|ref|XM_005745982.1|	PREDICTED: Pundamilia nyererei arylsulfatase A-like (LOC102197618), mRNA	1	8093	8093	exon-intron-exon-intron-exon-intergenic-exon-intron-exon-intron-exon-intron-exon-intron-exon-
NC_031972.2	52750455	52754068	gi|1434942885|ref|XM_019361620.2|	PREDICTED: Oreochromis niloticus tropomyosin 1 (tpm1), transcript variant X7, mRNA	1	3644	3644	exon-intron-exon-intron-exon-intron-exon-intron-exon-intron-exon-intron-exon-exon-exon-
NC_031972.2	52745730	52750889	gi|1434942889|ref|XM_019361621.2|	PREDICTED: Oreochromis niloticus tropomyosin 1 (tpm1), transcript variant X11, mRNA	1	5190	5190	exon-exon-exon-exon-exon-intron-exon-intron-exon-intron-exon-exon-exon-intron-exon-intron-exon-intron-exon-
NC_031972.2	48411677	48413963	gi|930743823|ref|XM_014335746.1|	PREDICTED: Haplochromis burtoni CUGBP Elav-like family member 2 (LOC102310863), mRNA	1	2317	2317	exon-intron-exon-intron-exon-
NC_031972.2	48410377	48412804	gi|930743823|ref|XM_014335746.1|	PREDICTED: Haplochromis burtoni CUGBP Elav-like family member 2 (LOC102310863), mRNA	1	2458	2458	exon-intron-exon-intron-exon-
NC_031972.2	48409310	48413963	gi|930743823|ref|XM_014335746.1|	PREDICTED: Haplochromis burtoni CUGBP Elav-like family member 2 (LOC102310863), mRNA	1	4684	4684	exon-intron-exon-intron-exon-intron-exon-intron-exon-
NC_031972.2	46683217	46683557	gi|548351937|ref|XM_005728189.1|	PREDICTED: Pundamilia nyererei transcriptional enhancer factor TEF-3-like (LOC102203976), mRNA	1	371	371	exon-intron-intergenic-
NC_031972.2	45961438	45988994	gi|1434939114|ref|XR_003220892.1|	PREDICTED: Oreochromis niloticus ankyrin repeat domain-containing protein 26 (LOC100711289), transcript variant X5, misc_RNA	1	27587	27587	exon-intron-exon-intron-exon-intron-exon-exon-intron-exon-intron-exon-intron-exon-intron-exon-intron-exon-intron-exon-intron-exon-intron-exon-intron-exon-intron-exon-intron-intron-exon-exon-intron-exon-intron-exon-intron-exon-intron-exon-intron-exon-intron-exon-intron-exon-intron-exon-intron-exon-intron-exon-exon-exon-intron-exon-exon-exon-exon-exon-intergenic-
NC_031972.2	45443531	45504905	gi|1110877824|ref|XM_019356445.1|	PREDICTED: Oreochromis niloticus transposon Ty3-I Gag-Pol polyprotein (LOC106098548), mRNA	1	61405	61405	exon-intron-exon-intron-exon-intergenic-exon-intron-exon-exon-exon-intron-intergenic-intron-intergenic-
NC_031972.2	45273975	45326869	gi|1434935127|ref|XM_003447521.5|	PREDICTED: Oreochromis niloticus catalase (LOC100712286), mRNA	1	52925	52925	exon-intron-exon-intron-exon-intron-exon-intron-exon-intron-exon-exon-exon-exon-intron-exon-intron-exon-intron-exon-intron-exon-intron-exon-intron-exon-intergenic-intron-intergenic-
NC_031972.2	41189270	41189586	gi|1434940305|ref|XM_025909126.1|	PREDICTED: Oreochromis niloticus suppression of tumorigenicity 7 (st7), transcript variant X7, mRNA	1	347	347	exon-exon-intron-
NC_031972.2	35919735	36360926	gi|1007795946|ref|XM_015941229.1|	PREDICTED: Nothobranchius furzeri acyl-CoA binding domain containing 4 (acbd4), mRNA	1	441222	441222	exon-exon-intron-exon-exon-exon-exon-intron-exon-intron-exon-intron-exon-intron-exon-intron-exon-intron-exon-intron-exon-intron-exon-exon-intron-exon-intron-exon-exon-intron-exon-intron-exon-intron-exon-intron-exon-intron-exon-intron-exon-intron-exon-exon-intron-exon-intron-exon-intron-exon-intron-exon-intron-exon-intron-exon-exon-intron-exon-intron-exon-intron-exon-intron-exon-intron-exon-intron…
NC_031972.2	3588775	3593483	gi|1434914918|ref|XM_005460158.4|	PREDICTED: Oreochromis niloticus fibrinogen alpha chain (LOC102076387), mRNA	1	4737	4737	intron-exon-intron-exon-intron-exon-intron-exon-
NC_031972.2	35875177	36092844	gi|1007795946|ref|XM_015941229.1|	PREDICTED: Nothobranchius furzeri acyl-CoA binding domain containing 4 (acbd4), mRNA	1	217698	217698	intron-exon-exon-intron-exon-intron-exon-intron-exon-exon-intron-exon-exon-exon-exon-exon-intron-exon-intron-exon-intron-exon-exon-exon-exon-intron-exon-intron-exon-exon-intron-exon-exon-intron-exon-intron-exon-exon-intron-exon-intron-exon-intron-exon-exon-intron-exon-exon-exon-exon-intron-exon-intron-exon-intron-exon-intron-exon-intron-exon-intron-exon-intron-exon-intron-exon-exon-intron-exon-in…
NC_031972.2	3587346	3588265	gi|1434936051|ref|XM_005449247.4|	PREDICTED: Oreochromis niloticus troponin T, fast skeletal muscle isoforms (LOC100707421), transcript variant X11, mRNA	1	948	948	exon-intron-exon-intron-exon-exon-intron-
NC_031972.2	3587344	3590213	gi|1434936051|ref|XM_005449247.4|	PREDICTED: Oreochromis niloticus troponin T, fast skeletal muscle isoforms (LOC100707421), transcript variant X11, mRNA	1	2898	2898	exon-intron-exon-intron-exon-exon-intron-exon-intron-exon-intron-exon-intron-exon-intron-
NC_031972.2	3587344	3589177	gi|1434936051|ref|XM_005449247.4|	PREDICTED: Oreochromis niloticus troponin T, fast skeletal muscle isoforms (LOC100707421), transcript variant X11, mRNA	1	1862	1862	exon-intron-exon-intron-exon-exon-intron-exon-intron-exon-intron-exon-intron-
NC_031972.2	35866960	36114061	gi|1007795946|ref|XM_015941229.1|	PREDICTED: Nothobranchius furzeri acyl-CoA binding domain containing 4 (acbd4), mRNA	1	247132	247132	exon-intron-exon-intron-exon-exon-exon-intergenic-exon-intron-exon-exon-intron-exon-intron-exon-intron-exon-exon-intron-exon-exon-exon-exon-exon-intron-exon-intron-exon-intron-exon-exon-exon-exon-intron-exon-intron-exon-exon-intron-exon-exon-intron-exon-intron-exon-exon-intron-exon-intron-exon-intron-exon-exon-intron-exon-exon-exon-exon-intron-exon-intron-exon-intron-exon-intron-exon-intron-exon-…
NC_031972.2	3584468	3590213	gi|15076659|dbj|AB067589.1|	Melanochromis joanjohnsonae DNA, SINE sequence, locus:1613	1	5774	5774	exon-intron-exon-intron-exon-intron-exon-intron-exon-exon-intron-exon-intron-exon-intron-exon-intron-exon-intron-
NC_031972.2	3583989	3584602	gi|1434936045|ref|XM_005449241.3|	PREDICTED: Oreochromis niloticus troponin T, fast skeletal muscle isoforms (LOC100707421), transcript variant X5, mRNA	1	642	642	intron-exon-intron-exon-
NC_031972.2	35497810	35787783	gi|118495715|dbj|AB270897.1|	Oreochromis niloticus MHC class IA antigen UBA1, UBA2, UAA1 genes, partial cds, UAA3 and UAA2 pseudogenes, UAA4, UAA5 and UAA6 pseudogene fragments	1	290004	290004	exon-intron-exon-intron-intron-exon-intergenic-exon-intron-exon-intron-exon-intron-exon-intergenic-exon-exon-intron-exon-exon-intron-exon-intron-exon-exon-exon-intergenic-exon-intron-exon-intron-exon-intron-exon-exon-intron-exon-intron-exon-intron-exon-intron-exon-exon-exon-intron-exon-intron-exon-exon-intron-exon-intron-exon-exon-intron-exon-intergenic-exon-intron-exon-intron-exon-intron-exon-in…
NC_031972.2	3497910	3499132	gi|1434940081|ref|XM_025909097.1|	PREDICTED: Oreochromis niloticus troponin I, fast skeletal muscle (LOC100706619), transcript variant X2, mRNA	1	1251	1251	exon-exon-intron-exon-intron-exon-
NC_031972.2	34471289	34492362	gi|930728877|ref|XM_005917002.2|	PREDICTED: Haplochromis burtoni leukemia inhibitory factor receptor-like (LOC102289449), mRNA	1	21104	21104	exon-exon-intron-exon-intron-exon-intron-exon-intron-exon-intron-exon-intron-exon-intron-exon-intron-exon-intron-exon-intron-exon-intron-exon-intron-exon-intron-exon-intron-exon-intron-exon-intron-exon-intron-exon-intron-exon-intron-exon-intron-exon-intron-exon-intron-exon-intron-intron-
NC_031972.2	3420665	3421094	gi|1434940918|ref|XM_003439386.5|	PREDICTED: Oreochromis niloticus dihydrolipoamide dehydrogenase (dld), mRNA	1	458	458	exon-intron-exon-
NC_031972.2	32935904	32936219	gi|583973488|ref|XM_006782086.1|	NOT ASSIGNED	1	346	346	exon-intron-exon-
NC_031971.2	6582330	6584695	gi|1434928560|ref|XM_025907802.1|	PREDICTED: Oreochromis niloticus basement membrane-specific heparan sulfate proteoglycan core protein (LOC100708464), mRNA	1	2394	2394	exon-intron-exon-intron-exon-intron-exon-
NC_031971.2	6581965	6583966	gi|1434928560|ref|XM_025907802.1|	PREDICTED: Oreochromis niloticus basement membrane-specific heparan sulfate proteoglycan core protein (LOC100708464), mRNA	1	2030	2030	exon-intron-exon-intron-exon-intron-exon-
NC_031971.2	42021773	42028544	gi|118495715|dbj|AB270897.1|	Oreochromis niloticus MHC class IA antigen UBA1, UBA2, UAA1 genes, partial cds, UAA3 and UAA2 pseudogenes, UAA4, UAA5 and UAA6 pseudogene fragments	1	6802	6802	exon-intron-exon-exon-intron-exon-intron-
NC_031971.2	4075465	4076159	gi|1434931636|ref|XM_005461334.4|	PREDICTED: Oreochromis niloticus endoplasmic reticulum oxidoreductase 1 beta (ero1b), transcript variant X2, mRNA	1	723	723	exon-intron-exon-
NC_031971.2	38268251	38298430	gi|118495715|dbj|AB270897.1|	Oreochromis niloticus MHC class IA antigen UBA1, UBA2, UAA1 genes, partial cds, UAA3 and UAA2 pseudogenes, UAA4, UAA5 and UAA6 pseudogene fragments	1	30210	30210	exon-intron-exon-intron-exon-intron-exon-intron-exon-exon-intron-exon-exon-exon-intron-exon-exon-intron-exon-intron-exon-intron-exon-intron-exon-intron-exon-intron-intron-exon-intron-exon-intron-exon-intron-exon-intron-exon-intron-exon-intron-exon-intron-exon-intron-exon-intron-exon-intron-exon-intron-exon-exon-intron-
NC_031971.2	38257090	38264908	gi|1434930807|ref|XM_025908070.1|	PREDICTED: Oreochromis niloticus integrin alpha-L (LOC109202376), transcript variant X9, mRNA	1	7849	7849	exon-intron-exon-intron-exon-intron-exon-intron-exon-intron-exon-
NC_031971.2	38253772	38288699	gi|118495715|dbj|AB270897.1|	Oreochromis niloticus MHC class IA antigen UBA1, UBA2, UAA1 genes, partial cds, UAA3 and UAA2 pseudogenes, UAA4, UAA5 and UAA6 pseudogene fragments	1	34958	34958	exon-intron-exon-intron-exon-intron-exon-intron-exon-intron-exon-intron-exon-intron-exon-intron-intron-exon-intron-exon-intron-exon-intron-exon-intron-exon-intron-exon-intron-exon-intron-exon-intron-exon-intron-exon-intron-exon-intron-exon-intron-exon-intron-exon-intron-exon-intron-exon-exon-intron-exon-exon-exon-intron-exon-exon-intron-exon-intron-exon-intron-exon-intron-exon-exon-intron-
NC_031971.2	38181487	38289422	gi|118495715|dbj|AB270897.1|	Oreochromis niloticus MHC class IA antigen UBA1, UBA2, UAA1 genes, partial cds, UAA3 and UAA2 pseudogenes, UAA4, UAA5 and UAA6 pseudogene fragments	1	107966	107966	exon-intron-exon-intron-exon-intron-exon-intron-exon-intron-exon-intron-exon-intron-exon-exon-intron-exon-intron-exon-intron-exon-intron-exon-intron-exon-intron-exon-intron-exon-intron-exon-intron-exon-intron-exon-intron-exon-intron-exon-intron-exon-intron-exon-intron-exon-intergenic-exon-intron-intron-exon-intergenic-exon-intron-exon-intron-exon-exon-intron-exon-intergenic-exon-intron-exon-intro…
NC_031971.2	38121738	38169161	gi|1434977697|ref|XM_025899837.1|	PREDICTED: Oreochromis niloticus paraneoplastic antigen Ma3-like (LOC112842685), mRNA	1	47454	47454	exon-intron-exon-intron-exon-intron-exon-intron-exon-intron-exon-intron-exon-intron-exon-exon-intron-exon-intron-exon-intron-exon-intron-exon-intron-exon-intron-exon-intron-exon-intron-exon-intron-exon-intron-exon-intron-exon-intron-exon-intron-exon-intron-exon-intron-exon-intron-exon-intron-exon-intron-exon-exon-exon-exon-exon-intron-exon-intron-exon-intron-exon-intron-intron-intergenic-
NC_031971.2	36909117	36938377	gi|1434930638|ref|XM_019359571.2|	PREDICTED: Oreochromis niloticus multidrug and toxin extrusion protein 1 (LOC100692267), mRNA	1	29291	29291	exon-intron-exon-exon-intron-exon-intron-exon-intron-exon-intron-exon-intron-exon-intron-exon-intron-exon-intron-exon-intron-exon-intron-exon-intron-exon-intron-exon-intron-exon-intron-exon-intron-exon-intergenic-exon-intron-exon-intron-exon-intron-exon-intron-exon-intron-exon-intron-intron-exon-intron-exon-intron-exon-intron-exon-intron-exon-intron-exon-intron-exon-intergenic-exon-
NC_031971.2	36907678	36935076	gi|1434930638|ref|XM_019359571.2|	PREDICTED: Oreochromis niloticus multidrug and toxin extrusion protein 1 (LOC100692267), mRNA	1	27429	27429	exon-intron-exon-intron-exon-intron-exon-intron-exon-intron-exon-exon-intron-exon-intron-exon-intron-exon-intron-exon-intron-exon-intron-exon-intron-exon-intron-exon-intron-exon-intron-exon-intron-exon-intron-exon-intron-exon-intron-exon-intron-exon-intergenic-exon-intron-exon-intron-exon-intron-exon-intron-exon-intron-exon-intron-intron-exon-intron-exon-intron-exon-intergenic-exon-
NC_031971.2	36906784	36934294	gi|1434930638|ref|XM_019359571.2|	PREDICTED: Oreochromis niloticus multidrug and toxin extrusion protein 1 (LOC100692267), mRNA	1	27541	27541	exon-intron-exon-intron-exon-intron-exon-intron-exon-intron-exon-intron-exon-intron-exon-exon-intron-exon-intron-exon-intron-exon-intron-exon-intron-exon-intron-exon-intron-exon-intron-exon-intron-exon-intron-exon-intron-exon-intron-exon-intron-exon-intron-exon-intron-exon-intergenic-exon-intron-exon-intron-exon-intron-exon-intron-exon-intron-exon-intron-intron-exon-intergenic-exon-
NC_031971.2	36905900	36917424	gi|1110945139|ref|XM_013273031.2|	PREDICTED: Oreochromis niloticus multidrug and toxin extrusion protein 1 (LOC100692807), mRNA	1	11555	11555	exon-intron-exon-intron-exon-intron-exon-intron-exon-intron-exon-intron-exon-intron-exon-intron-exon-intron-exon-exon-intron-exon-intron-exon-intron-exon-intron-exon-intron-exon-intergenic-
NC_031971.2	36904811	36915151	gi|1110945139|ref|XM_013273031.2|	PREDICTED: Oreochromis niloticus multidrug and toxin extrusion protein 1 (LOC100692807), mRNA	1	10371	10371	exon-intron-exon-intron-exon-intron-exon-intron-exon-intron-exon-intron-exon-intron-exon-intron-exon-intron-exon-intron-exon-intron-exon-exon-intron-exon-intron-exon-intron-exon-intergenic-
NC_031971.2	34388402	34399716	gi|930731281|ref|XM_005919031.2|	PREDICTED: Haplochromis burtoni cell division cycle 14B (cdc14b), transcript variant X10, mRNA	1	11345	11345	exon-exon-intron-exon-intron-exon-intron-
NC_031971.2	31570077	31609779	gi|1468890250|ref|XM_026146493.1|	PREDICTED: Astatotilapia calliptera zinc finger CCHC domain-containing protein 18-like (LOC113008771), mRNA	1	39733	39733	exon-intron-exon-intron-exon-exon-exon-intron-exon-intron-exon-intron-exon-intron-exon-intron-exon-intron-exon-intron-exon-exon-exon-exon-exon-intron-exon-exon-intron-exon-intron-exon-intron-exon-intron-exon-intron-exon-intron-exon-exon-intron-exon-intron-exon-intron-intron-intergenic-
NC_031971.2	30305630	30307437	gi|1434929402|ref|XM_025907908.1|	PREDICTED: Oreochromis niloticus gamma-adducin (LOC100699311), transcript variant X9, mRNA	1	1838	1838	exon-intron-exon-intron-exon-
NC_031971.2	27059186	27061091	gi|583984586|ref|XM_006787490.1|	PREDICTED: Neolamprologus brichardi ubinuclein-2-like (LOC102799674), mRNA	1	1936	1936	exon-intron-exon-intron-exon-
NC_031971.2	25801954	25828556	gi|118495715|dbj|AB270897.1|	Oreochromis niloticus MHC class IA antigen UBA1, UBA2, UAA1 genes, partial cds, UAA3 and UAA2 pseudogenes, UAA4, UAA5 and UAA6 pseudogene fragments	1	26633	26633	exon-intron-exon-exon-intron-exon-intron-exon-intergenic-exon-intron-exon-exon-intron-exon-intron-exon-intergenic-intergenic-
NC_031971.2	25304261	25305356	gi|1381436082|ref|XR_001342150.3|	NOT ASSIGNED	1	1126	1126	exon-intron-exon-
NC_031971.2	25131932	25140449	gi|1468940227|ref|XM_026170622.1|	PREDICTED: Astatotilapia calliptera paralemmin-1-like (LOC113024041), transcript variant X7, mRNA	1	8548	8548	exon-exon-exon-intron-exon-intron-exon-intron-exon-intron-exon-exon-intron-
NC_031971.2	25131932	25139815	gi|1468940227|ref|XM_026170622.1|	PREDICTED: Astatotilapia calliptera paralemmin-1-like (LOC113024041), transcript variant X7, mRNA	1	7914	7914	exon-exon-exon-intron-exon-intron-exon-intron-exon-intron-
NC_031971.2	24932987	24933518	gi|1434928483|ref|XM_013272974.3|	PREDICTED: Oreochromis niloticus nuclear factor 1 X-type (LOC100690838), transcript variant X13, mRNA	1	562	562	exon-
NC_031971.2	24582936	24598098	gi|1381436351|ref|XM_014411689.3|	PREDICTED: Maylandia zebra low-density lipoprotein receptor 1 (LOC106675973), transcript variant X2, mRNA	1	15193	15193	exon-intron-exon-intron-exon-intron-exon-intron-exon-intron-exon-intron-exon-exon-intron-exon-intron-exon-intron-exon-intron-exon-intron-exon-intron-exon-intron-
NC_031971.2	24581920	24597015	gi|1381436351|ref|XM_014411689.3|	PREDICTED: Maylandia zebra low-density lipoprotein receptor 1 (LOC106675973), transcript variant X2, mRNA	1	15126	15126	exon-intron-exon-intron-exon-intron-exon-intron-exon-intron-exon-intron-exon-intron-exon-intron-exon-intron-exon-intron-exon-exon-intron-exon-intron-exon-intron-
NC_031971.2	13802766	13821080	gi|1434927174|ref|XM_019360108.2|	PREDICTED: Oreochromis niloticus toll-like receptor 2 (LOC109202487), mRNA	1	18345	18345	exon-intron-exon-intron-exon-intron-exon-intron-exon-exon-exon-exon-intron-exon-intergenic-exon-exon-intergenic-exon-intron-exon-intron-exon-intron-exon-intron-exon-intron-exon-intron-exon-intron-exon-intron-exon-intron-
NC_031971.2	1339490	1460006	gi|1468848660|ref|XM_026160721.1|	PREDICTED: Astatotilapia calliptera NACHT, LRR and PYD domains-containing protein 12-like (LOC113017568), transcript variant X2, mRNA	1	120545	120545	exon-intron-exon-exon-intron-exon-intron-exon-intron-exon-intron-exon-exon-intron-exon-intron-exon-intergenic-exon-intron-exon-intron-exon-intergenic-exon-intron-exon-intron-exon-intron-exon-intron-exon-exon-intron-exon-exon-intron-exon-intron-exon-exon-intergenic-intergenic-intergenic-
NC_031971.2	10943024	10955563	gi|1434927546|ref|XM_025907682.1|	PREDICTED: Oreochromis niloticus MICAL-like protein 2 (LOC102076226), transcript variant X3, mRNA	1	12570	12570	exon-exon-intron-exon-intron-exon-intron-exon-intron-exon-intron-exon-intron-exon-intron-exon-exon-intron-exon-intron-exon-intron-exon-intron-exon-intron-exon-intron-exon-intron-exon-intron-
NC_031971.2	10730276	10750201	gi|2243155|emb|Y11732.1|	Oreochromis mossambicus tigH gene	1	19956	19956	exon-intron-exon-intron-exon-intron-exon-exon-exon-intron-exon-intron-exon-intron-exon-intron-exon-intron-exon-intron-exon-intron-exon-intron-exon-intron-exon-intron-exon-intron-exon-intron-exon-exon-intergenic-exon-intron-exon-exon-intron-intergenic-
NC_031971.2	10107413	10132646	gi|1434927579|ref|XM_025907686.1|	PREDICTED: Oreochromis niloticus sialoadhesin (LOC109202518), mRNA	1	25264	25264	exon-intron-exon-exon-intron-exon-intron-exon-intron-exon-intron-exon-intron-exon-intron-intergenic-
NC_031970.2	9538356	9541115	gi|1434921495|ref|XM_019359065.2|	PREDICTED: Oreochromis niloticus immunoglobulin-like and fibronectin type III domain-containing protein 1 (LOC100707924), mRNA	1	2788	2788	exon-intron-
NC_031970.2	6746571	6750567	gi|1434921264|ref|XM_013276942.3|	PREDICTED: Oreochromis niloticus ras-related protein Rap-1A (LOC100692376), transcript variant X6, mRNA	1	4025	4025	exon-exon-intron-exon-intron-exon-exon-intron-
NC_031970.2	6666323	6674929	gi|923832941|ref|XM_013912640.1|	PREDICTED: Pundamilia nyererei guanine nucleotide-binding protein G(s) subunit alpha-like (LOC102208626), mRNA	1	8635	8635	exon-intron-exon-exon-exon-intron-
NC_031970.2	32666106	32668191	gi|1434926028|ref|XM_005450143.4|	PREDICTED: Oreochromis niloticus PDZ domain containing ring finger 3 (pdzrn3), transcript variant X2, mRNA	1	2116	2116	exon-intron-exon-
NC_031970.2	26994248	27032152	gi|1434953150|ref|XM_003443639.5|	PREDICTED: Oreochromis niloticus DEP domain containing 1B (depdc1b), transcript variant X1, mRNA	1	37935	37935	exon-exon-intron-exon-exon-intron-exon-intron-intron-
NC_031970.2	24263108	24264783	gi|930738431|ref|XM_005924844.2|	PREDICTED: Haplochromis burtoni gastrula zinc finger protein XlCGF57.1-like (LOC102304359), transcript variant X21, mRNA	1	1706	1706	exon-intron-exon-intron-exon-intron-exon-
NC_031970.2	24262377	24264783	gi|1317083159|ref|XM_023420114.1|	PREDICTED: Seriola lalandi dorsalis zinc finger protein 148-like (LOC111665193), mRNA	1	2437	2437	exon-intron-exon-intron-exon-intron-exon-intron-exon-
NC_031970.2	23997227	24023212	gi|1059791593|gb|AH013711.2|	Oreochromis niloticus KLR3 (KLR3) gene, exons 2 through 7; KLR2 pseudogene, partial sequence; KLR1 gene, complete sequence; KLR4 (KLR4) gene, exons 2 through 7; KLR5 (KLR5) gene, exons 1 through 7; KLR6 and KLR7 pseudogenes, complete sequence; KLR9 (KLR10) pseudogene, exons 4 through 7; KLR8 pseudogene, partial sequence; KLR9 (KLR9) gene, exons 1 through 7; C-type lectin (CLECT2)-like protein gen…	1	26016	26016	exon-intron-exon-intron-exon-intron-exon-exon-exon-intron-exon-exon-intron-exon-intron-exon-intron-exon-intron-exon-intron-exon-intron-exon-intron-exon-exon-intergenic-exon-intron-exon-exon-intron-exon-intron-exon-intron-intron-
NC_031970.2	23603022	23603383	gi|1434926026|ref|XM_003441476.5|	PREDICTED: Oreochromis niloticus ATP-dependent 6-phosphofructokinase, muscle type (pfk), mRNA	1	392	392	exon-intron-exon-intron-exon-
NC_031970.2	21285563	21323277	gi|118495715|dbj|AB270897.1|	Oreochromis niloticus MHC class IA antigen UBA1, UBA2, UAA1 genes, partial cds, UAA3 and UAA2 pseudogenes, UAA4, UAA5 and UAA6 pseudogene fragments	1	37745	37745	exon-intron-exon-intron-exon-intron-exon-intron-exon-intron-exon-intron-exon-exon-intron-exon-intron-exon-intron-exon-exon-exon-intron-exon-intron-exon-intron-exon-intron-exon-intron-exon-intron-exon-exon-intron-exon-exon-exon-intron-exon-intron-exon-intron-exon-intron-exon-intron-exon-intron-exon-intron-exon-exon-intron-exon-intron-exon-intron-exon-intron-exon-intron-exon-intron-exon-intron-exon…
NC_031970.2	20380032	20501999	gi|118495715|dbj|AB270897.1|	Oreochromis niloticus MHC class IA antigen UBA1, UBA2, UAA1 genes, partial cds, UAA3 and UAA2 pseudogenes, UAA4, UAA5 and UAA6 pseudogene fragments	1	121998	121998	exon-intron-exon-intron-exon-intron-exon-intron-exon-exon-intron-exon-intron-exon-intron-exon-exon-exon-intron-exon-intron-exon-intron-exon-intron-exon-intron-exon-intron-exon-intron-exon-intron-exon-intron-exon-intron-exon-intron-exon-intron-exon-intron-exon-intron-exon-intron-exon-intron-exon-intron-exon-intron-exon-exon-intron-exon-intron-exon-intron-exon-intergenic-exon-intron-exon-intron-exo…
NC_031970.2	15764627	15775031	gi|930756316|ref|XM_005938868.2|	PREDICTED: Haplochromis burtoni C-reactive protein-like (LOC102302474), mRNA	1	10435	10435	exon-intron-exon-intron-exon-intergenic-exon-intron-exon-
NC_031970.2	14397281	14443824	gi|118495715|dbj|AB270897.1|	Oreochromis niloticus MHC class IA antigen UBA1, UBA2, UAA1 genes, partial cds, UAA3 and UAA2 pseudogenes, UAA4, UAA5 and UAA6 pseudogene fragments	1	46574	46574	exon-intron-exon-intron-exon-exon-intergenic-exon-intron-exon-intron-exon-intron-exon-intron-exon-intron-exon-intron-exon-intron-exon-intron-exon-intron-exon-intron-exon-intron-exon-intron-exon-intron-exon-exon-intergenic-exon-exon-intron-exon-intron-exon-intron-exon-intron-exon-intron-exon-intron-exon-intron-exon-exon-intron-exon-exon-intron-exon-intron-exon-intron-intergenic-intron-
NC_031970.2	14395936	14442011	gi|118495715|dbj|AB270897.1|	Oreochromis niloticus MHC class IA antigen UBA1, UBA2, UAA1 genes, partial cds, UAA3 and UAA2 pseudogenes, UAA4, UAA5 and UAA6 pseudogene fragments	1	46106	46106	exon-intron-exon-intron-exon-intron-exon-intron-exon-exon-intergenic-exon-intron-exon-intron-exon-intron-exon-intron-exon-intron-exon-intron-exon-intron-exon-intron-exon-intron-exon-intron-exon-intron-exon-intron-exon-intron-exon-exon-intergenic-exon-exon-intron-exon-intron-exon-intron-exon-intron-exon-intron-exon-intron-exon-intron-exon-exon-intron-exon-exon-intron-intergenic-intron-
NC_031969.2	9225307	9288209	gi|1434919452|ref|XM_013270134.3|	PREDICTED: Oreochromis niloticus tripartite motif-containing protein 16 (LOC100702348), mRNA	1	62931	62931	exon-intron-exon-intron-exon-intron-exon-intron-exon-exon-exon-intron-exon-intron-exon-intergenic-exon-exon-intergenic-exon-exon-exon-intergenic-intron-intron-
NC_031969.2	5801446	5981539	gi|1434919106|ref|XM_003446465.5|	PREDICTED: Oreochromis niloticus carnitine O-palmitoyltransferase 1, liver isoform (LOC100698402), mRNA	1	180122	180122	exon-exon-exon-exon-exon-exon-intron-exon-intron-exon-intron-exon-exon-intron-exon-intron-exon-intron-exon-intron-exon-intron-exon-intron-exon-intron-exon-intron-exon-intron-exon-exon-exon-exon-intron-exon-exon-intron-exon-intergenic-exon-intron-exon-intron-exon-intron-exon-intron-exon-exon-exon-exon-intergenic-intron-exon-exon-intron-exon-intron-exon-intron-exon-intron-exon-intron-exon-exon-intr…
NC_031969.2	5792327	5947783	gi|1434919106|ref|XM_003446465.5|	PREDICTED: Oreochromis niloticus carnitine O-palmitoyltransferase 1, liver isoform (LOC100698402), mRNA	1	155485	155485	exon-intron-exon-intron-exon-intron-exon-intron-exon-exon-exon-exon-exon-exon-exon-intron-exon-intron-exon-intron-exon-exon-intron-exon-intron-exon-intron-exon-intron-exon-intron-exon-intron-exon-intron-exon-intron-exon-intron-exon-exon-exon-exon-intron-exon-exon-intron-exon-intergenic-exon-intron-exon-intron-exon-intron-exon-intron-exon-exon-exon-exon-intergenic-intron-exon-exon-intron-exon-intr…
NC_031969.2	5757950	5932866	gi|1434919106|ref|XM_003446465.5|	PREDICTED: Oreochromis niloticus carnitine O-palmitoyltransferase 1, liver isoform (LOC100698402), mRNA	1	174945	174945	exon-intron-exon-intron-exon-intron-exon-exon-intron-exon-exon-intron-exon-intron-exon-intron-exon-intron-exon-exon-exon-exon-exon-exon-exon-intron-exon-intron-exon-intron-exon-exon-intron-exon-intron-exon-intron-exon-intron-exon-intron-exon-intron-exon-intron-exon-intron-exon-intron-exon-exon-exon-exon-intron-exon-exon-intron-exon-intergenic-exon-intron-exon-intron-exon-intron-exon-intron-exon-e…
NC_031969.2	4710417	4782331	gi|1434919066|ref|XM_019358285.2|	PREDICTED: Oreochromis niloticus beta-1,4 N-acetylgalactosaminyltransferase 2 (LOC100694685), transcript variant X3, mRNA	1	71943	71943	exon-intron-exon-intron-exon-intron-exon-intron-exon-intron-exon-intron-exon-exon-intron-exon-intron-exon-intron-exon-intron-exon-exon-intergenic-exon-intron-exon-intron-exon-intron-exon-exon-intron-exon-intron-exon-intron-exon-intron-exon-intergenic-exon-exon-intron-exon-intron-exon-exon-intron-exon-intergenic-exon-intron-exon-intron-exon-intron-exon-exon-intergenic-intergenic-intron-
NC_031969.2	4589761	4589814	gi|525343822|ref|NM_001279444.1|	Oreochromis niloticus collagen type I alpha 1 chain (col1a1), mRNA	1	82	82	exon-
NC_031969.2	3455146	3475990	gi|118495715|dbj|AB270897.1|	Oreochromis niloticus MHC class IA antigen UBA1, UBA2, UAA1 genes, partial cds, UAA3 and UAA2 pseudogenes, UAA4, UAA5 and UAA6 pseudogene fragments	1	20873	20873	exon-exon-intron-intron-exon-intron-exon-intron-exon-exon-intron-exon-exon-intron-
NC_031969.2	3453283	3473138	gi|118495715|dbj|AB270897.1|	Oreochromis niloticus MHC class IA antigen UBA1, UBA2, UAA1 genes, partial cds, UAA3 and UAA2 pseudogenes, UAA4, UAA5 and UAA6 pseudogene fragments	1	19884	19884	intron-exon-intron-exon-intergenic-exon-exon-intron-intron-exon-intron-exon-intron-exon-exon-intron-
NC_031969.2	34246086	34247624	gi|118495715|dbj|AB270897.1|	Oreochromis niloticus MHC class IA antigen UBA1, UBA2, UAA1 genes, partial cds, UAA3 and UAA2 pseudogenes, UAA4, UAA5 and UAA6 pseudogene fragments	1	1569	1569	exon-exon-intron-exon-intron-exon-
NC_031969.2	29832223	29844301	gi|584016786|ref|XM_006803081.1|	PREDICTED: Neolamprologus brichardi dentin sialophosphoprotein-like (LOC102795808), mRNA	1	12109	12109	exon-exon-intron-exon-intron-exon-intron-exon-intron-exon-intron-exon-intron-exon-intron-exon-intron-exon-intron-exon-intergenic-
NC_031969.2	26843126	26847198	gi|1434917335|ref|XM_019357723.2|	PREDICTED: Oreochromis niloticus cytosolic 5'-nucleotidase 3 (LOC100701809), mRNA	1	4103	4103	exon-intergenic-exon-exon-exon-intron-exon-exon-intron-exon-intron-exon-intron-exon-intron-exon-intron-exon-intron-exon-
NC_031969.2	26611300	26619165	gi|1326041661|gb|MG680274.1|	Oreochromis niloticus LGP2 gene, complete cds	1	7896	7896	exon-intron-exon-intron-exon-intron-exon-intron-exon-intron-exon-intron-exon-intron-exon-intron-exon-intergenic-exon-intron-exon-intron-exon-intron-exon-
NC_031969.2	25767985	25778572	gi|1434917190|ref|XM_019357750.2|	PREDICTED: Oreochromis niloticus apoptosis regulator BAX (LOC109201890), mRNA	1	10618	10618	exon-intron-exon-intron-exon-intergenic-exon-intron-exon-exon-intron-exon-intron-exon-intergenic-exon-intron-exon-intron-exon-intron-exon-intron-exon-intron-exon-intron-exon-intron-exon-intergenic-exon-intron-exon-intron-exon-intergenic-
NC_031969.2	25767141	25777218	gi|1434917190|ref|XM_019357750.2|	PREDICTED: Oreochromis niloticus apoptosis regulator BAX (LOC109201890), mRNA	1	10108	10108	exon-intron-exon-intron-exon-intron-exon-intron-exon-intergenic-exon-intron-exon-exon-intron-exon-intron-exon-intergenic-exon-intron-exon-intron-exon-intron-exon-intron-exon-intron-exon-intron-exon-intron-exon-intergenic-exon-intergenic-
NC_031969.2	23997110	24049968	gi|1381416679|ref|XM_024802230.1|	PREDICTED: Maylandia zebra intercellular adhesion molecule 1 (LOC101464316), transcript variant X4, mRNA	1	52889	52889	exon-intron-exon-intron-exon-intergenic-exon-intron-exon-intron-exon-exon-intron-exon-intron-exon-intron-exon-intergenic-exon-intron-exon-intron-exon-intron-exon-intron-exon-intergenic-exon-intron-exon-intron-exon-intron-exon-intron-exon-intron-exon-intron-exon-intron-exon-exon-exon-intron-exon-intron-exon-intron-exon-intron-exon-exon-exon-intron-exon-intron-exon-intron-exon-intron-exon-exon-inte…
NC_031969.2	23488342	23488872	gi|1434918607|ref|XM_019357831.2|	PREDICTED: Oreochromis niloticus myosin heavy chain, fast skeletal muscle (LOC100707599), mRNA	1	561	561	exon-intron-exon-intron-exon-
NC_031969.2	23488275	23511463	gi|1110938500|ref|XM_019357842.1|	PREDICTED: Oreochromis niloticus myosin heavy chain, fast skeletal muscle (LOC100706261), mRNA	1	23219	23219	intron-exon-intron-exon-intron-exon-intron-exon-intron-exon-intron-exon-intron-exon-intron-exon-intron-exon-intron-exon-intron-exon-intron-exon-intron-exon-intron-exon-intron-exon-intron-exon-intron-exon-intron-exon-intron-exon-intron-exon-intron-exon-intron-exon-exon-intron-exon-intron-exon-intron-exon-intron-exon-intron-exon-intron-exon-intron-exon-intron-exon-intron-exon-intron-exon-intron-exo…
NC_031969.2	23478097	23556263	gi|118495715|dbj|AB270897.1|	Oreochromis niloticus MHC class IA antigen UBA1, UBA2, UAA1 genes, partial cds, UAA3 and UAA2 pseudogenes, UAA4, UAA5 and UAA6 pseudogene fragments	1	78197	78197	exon-exon-intron-exon-intron-exon-intron-exon-intergenic-exon-intron-exon-intron-exon-intron-exon-intron-exon-intron-exon-intron-exon-intron-exon-intron-exon-intron-exon-intron-exon-intron-exon-intron-exon-intron-exon-intron-exon-intron-exon-intron-exon-intron-exon-intron-exon-intron-exon-intron-exon-intron-exon-intron-exon-intron-exon-intron-exon-intron-exon-intron-exon-intron-exon-intron-exon-i…
NC_031969.2	23476318	23554980	gi|118495715|dbj|AB270897.1|	Oreochromis niloticus MHC class IA antigen UBA1, UBA2, UAA1 genes, partial cds, UAA3 and UAA2 pseudogenes, UAA4, UAA5 and UAA6 pseudogene fragments	1	78693	78693	exon-intron-exon-intron-exon-intron-exon-intron-exon-intron-exon-intron-exon-intron-exon-exon-intron-exon-intron-exon-intron-exon-intergenic-exon-intron-exon-intron-exon-intron-exon-intron-exon-intron-exon-intron-exon-intron-exon-intron-exon-intron-exon-intron-exon-intron-exon-intron-exon-intron-exon-intron-exon-intron-exon-intron-exon-intron-exon-intron-exon-intron-exon-intron-exon-intron-exon-i…
NC_031969.2	23473794	23552339	gi|118495715|dbj|AB270897.1|	Oreochromis niloticus MHC class IA antigen UBA1, UBA2, UAA1 genes, partial cds, UAA3 and UAA2 pseudogenes, UAA4, UAA5 and UAA6 pseudogene fragments	1	78576	78576	intron-exon-intron-exon-intron-exon-intron-exon-intron-exon-intron-exon-intron-exon-intron-exon-intron-exon-intron-exon-intron-exon-intron-exon-intron-exon-intron-exon-intron-exon-intron-exon-intron-exon-intron-exon-exon-intron-exon-intron-exon-intron-exon-intergenic-exon-intron-exon-intron-exon-intron-exon-intron-exon-intron-exon-intron-exon-intron-exon-intron-exon-intron-exon-intron-exon-intron…
NC_031969.2	23473791	23511383	gi|1110938500|ref|XM_019357842.1|	PREDICTED: Oreochromis niloticus myosin heavy chain, fast skeletal muscle (LOC100706261), mRNA	1	37623	37623	intron-exon-intron-exon-intron-exon-intron-exon-intron-exon-intron-exon-intron-exon-intron-exon-intron-exon-intron-exon-intron-exon-intron-exon-intron-exon-intron-exon-intron-exon-intron-exon-intron-exon-intron-exon-exon-intron-exon-intron-exon-intron-exon-intergenic-exon-intron-exon-intron-exon-intron-exon-intron-exon-intron-exon-intron-exon-intron-exon-intron-exon-intron-exon-intron-exon-intron…
NC_031969.2	23448352	23556263	gi|118495715|dbj|AB270897.1|	Oreochromis niloticus MHC class IA antigen UBA1, UBA2, UAA1 genes, partial cds, UAA3 and UAA2 pseudogenes, UAA4, UAA5 and UAA6 pseudogene fragments	1	107942	107942	exon-intron-exon-intron-exon-intron-exon-intron-exon-intergenic-exon-intron-exon-intron-exon-intron-exon-intron-exon-intron-exon-intron-exon-intron-exon-intron-exon-intron-exon-intron-exon-intron-exon-intron-exon-intron-exon-intron-exon-intron-exon-intron-exon-intron-exon-intron-exon-intron-exon-intron-exon-intron-exon-intron-exon-intron-exon-intron-exon-intron-exon-intron-exon-intron-exon-intron…
NC_031969.2	23444354	23552784	gi|118495715|dbj|AB270897.1|	Oreochromis niloticus MHC class IA antigen UBA1, UBA2, UAA1 genes, partial cds, UAA3 and UAA2 pseudogenes, UAA4, UAA5 and UAA6 pseudogene fragments	1	108461	108461	exon-intron-exon-intron-exon-intron-exon-intron-exon-intron-intron-exon-intron-exon-intron-exon-intron-exon-intron-exon-intron-exon-intron-exon-intron-exon-intron-exon-intron-exon-intron-exon-intron-exon-intron-exon-intron-exon-intron-exon-intergenic-exon-intron-exon-intron-exon-intron-exon-intron-exon-intron-exon-intron-exon-intron-exon-intron-exon-intron-exon-intron-exon-intron-exon-intron-exon…
NC_031969.2	23414619	23475040	gi|1434918652|ref|XM_019357841.2|	PREDICTED: Oreochromis niloticus myosin heavy chain, fast skeletal muscle (LOC100698204), mRNA	1	60452	60452	exon-intron-exon-intron-exon-intron-exon-intron-exon-intron-exon-intron-exon-intron-exon-intron-exon-intron-exon-intron-exon-intron-exon-intron-exon-intron-exon-intron-exon-intron-exon-intron-exon-exon-intron-exon-intron-exon-intergenic-exon-intron-exon-intron-exon-intron-exon-intron-exon-intron-exon-intron-exon-intron-exon-intron-exon-intron-exon-intron-exon-intron-exon-intron-exon-intron-exon-i…
NC_031969.2	23412815	23551824	gi|118495715|dbj|AB270897.1|	Oreochromis niloticus MHC class IA antigen UBA1, UBA2, UAA1 genes, partial cds, UAA3 and UAA2 pseudogenes, UAA4, UAA5 and UAA6 pseudogene fragments	1	139040	139040	exon-intron-exon-intron-exon-intron-exon-intron-exon-intron-exon-intron-exon-intron-exon-intron-exon-intron-exon-intron-exon-intron-exon-intron-exon-intron-exon-intron-exon-intron-exon-intron-exon-intron-exon-intron-exon-intron-exon-intron-exon-intron-exon-intron-exon-exon-intron-exon-intron-exon-intergenic-exon-intron-exon-intron-exon-intron-exon-intron-exon-intron-exon-intron-exon-intron-exon-i…
NC_031969.2	23412548	23472505	gi|1434918652|ref|XM_019357841.2|	PREDICTED: Oreochromis niloticus myosin heavy chain, fast skeletal muscle (LOC100698204), mRNA	1	59988	59988	exon-exon-intron-exon-intron-exon-intron-exon-intron-exon-intron-exon-intron-exon-intron-exon-intron-exon-intron-exon-intron-exon-intron-exon-intron-exon-intron-exon-intron-exon-intron-exon-intron-exon-intron-exon-intron-exon-intron-exon-intron-exon-intron-exon-intron-exon-exon-intron-exon-intron-exon-intergenic-exon-intron-exon-intron-exon-intron-exon-intron-exon-intron-exon-intron-exon-intron-e…
NC_031969.2	23412388	23472388	gi|1434918652|ref|XM_019357841.2|	PREDICTED: Oreochromis niloticus myosin heavy chain, fast skeletal muscle (LOC100698204), mRNA	1	60031	60031	exon-intron-exon-exon-intron-exon-intron-exon-intron-exon-intron-exon-intron-exon-intron-exon-intron-exon-intron-exon-intron-exon-intron-exon-intron-exon-intron-exon-intron-exon-intron-exon-intron-exon-intron-exon-intron-exon-intron-exon-intron-exon-intron-exon-intron-exon-intron-exon-exon-intron-exon-intron-exon-intergenic-exon-intron-exon-intron-exon-intron-exon-intron-exon-intron-exon-intron-e…
NC_031969.2	23408950	23483557	gi|1434918653|ref|XM_019357843.2|	PREDICTED: Oreochromis niloticus myosin heavy chain, fast skeletal muscle (LOC100689722), mRNA	1	74638	74638	exon-intron-exon-intron-exon-intron-exon-intron-exon-intron-exon-intron-exon-intron-exon-intron-exon-intron-exon-intron-exon-intron-exon-intron-exon-intron-exon-exon-intron-exon-intron-exon-intron-exon-intron-exon-intron-exon-intron-exon-intron-exon-intron-exon-intron-exon-intron-exon-intron-exon-intron-exon-intron-exon-intron-exon-intron-exon-intron-exon-intron-exon-intron-exon-intron-exon-intro…
NC_031969.2	23397921	23556263	gi|118495715|dbj|AB270897.1|	Oreochromis niloticus MHC class IA antigen UBA1, UBA2, UAA1 genes, partial cds, UAA3 and UAA2 pseudogenes, UAA4, UAA5 and UAA6 pseudogene fragments	1	158373	158373	exon-intron-exon-intron-exon-intergenic-exon-intron-exon-intron-exon-intron-exon-intron-exon-intron-exon-intron-exon-intron-exon-intergenic-exon-intron-exon-intron-exon-intron-exon-intron-exon-intron-exon-intron-exon-intron-exon-intron-exon-intron-exon-intron-exon-intron-exon-intron-exon-intron-exon-intron-exon-intron-exon-exon-intron-exon-intron-exon-intron-exon-intron-exon-intron-exon-intron-ex…
NC_031969.2	23391379	23488079	gi|1434918653|ref|XM_019357843.2|	PREDICTED: Oreochromis niloticus myosin heavy chain, fast skeletal muscle (LOC100689722), mRNA	1	96731	96731	intron-exon-intron-exon-intron-exon-intron-exon-intron-exon-intron-exon-intron-exon-intron-exon-intron-exon-intron-exon-intron-exon-intron-intron-exon-intron-exon-intron-exon-intron-exon-intron-exon-intron-exon-intron-exon-intron-exon-intergenic-exon-intron-exon-intron-exon-intron-exon-intron-exon-intron-exon-intron-exon-intron-exon-intergenic-exon-intron-exon-intron-exon-intron-exon-intron-exon-…
NC_031969.2	23374283	23556263	gi|118495715|dbj|AB270897.1|	Oreochromis niloticus MHC class IA antigen UBA1, UBA2, UAA1 genes, partial cds, UAA3 and UAA2 pseudogenes, UAA4, UAA5 and UAA6 pseudogene fragments	1	182011	182011	exon-intron-exon-intron-exon-intron-exon-exon-intron-exon-intron-exon-intergenic-exon-intron-exon-intron-exon-intron-exon-intron-exon-intron-exon-intron-exon-intron-exon-intron-exon-intron-exon-intron-exon-intron-exon-intron-exon-intron-exon-intron-exon-intron-exon-intron-exon-intron-exon-intron-exon-intron-exon-intron-exon-intron-exon-intron-exon-intron-exon-intron-exon-intron-exon-intron-intron…
NC_031969.2	23370195	23485235	gi|1434918653|ref|XM_019357843.2|	PREDICTED: Oreochromis niloticus myosin heavy chain, fast skeletal muscle (LOC100689722), mRNA	1	115071	115071	exon-intron-exon-intron-exon-intron-exon-intron-exon-intron-exon-intron-exon-intron-exon-intron-exon-intron-exon-intron-exon-intron-exon-intron-exon-intron-exon-intron-exon-intron-exon-intron-exon-intron-exon-intron-exon-intron-exon-exon-intron-exon-intron-exon-intergenic-exon-intron-exon-intron-exon-intron-exon-intron-exon-intron-exon-intron-exon-intron-exon-intron-exon-intron-exon-intron-exon-i…
NC_031969.2	19808555	19839230	gi|1434915810|ref|XM_013274300.3|	PREDICTED: Oreochromis niloticus nuclear GTPase SLIP-GC (LOC102081603), transcript variant X8, mRNA	1	30706	30706	exon-intron-exon-exon-intron-exon-intron-exon-intron-exon-exon-intron-exon-exon-intron-exon-intron-exon-intron-exon-intron-exon-intron-exon-intron-exon-intron-exon-intron-exon-intron-exon-intron-exon-intron-exon-intron-exon-intron-
NC_031969.2	19789828	19804907	gi|1434915806|ref|XM_025906212.1|	PREDICTED: Oreochromis niloticus nuclear GTPase SLIP-GC (LOC102081603), transcript variant X7, mRNA	1	15110	15110	exon-intron-exon-intron-exon-intron-exon-intron-exon-intron-exon-intron-exon-exon-exon-exon-intron-exon-intron-exon-intron-exon-intron-exon-exon-intron-exon-intron-exon-intron-exon-intron-exon-intron-exon-intron-exon-intron-exon-intron-exon-intron-exon-intron-exon-intron-exon-intron-
NC_031969.2	19764980	19833796	gi|1434915810|ref|XM_013274300.3|	PREDICTED: Oreochromis niloticus nuclear GTPase SLIP-GC (LOC102081603), transcript variant X8, mRNA	1	68847	68847	exon-intron-exon-intron-exon-intron-exon-intron-exon-intron-exon-intron-exon-intron-exon-intron-exon-intron-exon-intron-exon-intron-exon-intron-exon-intron-exon-intron-exon-intron-exon-intron-exon-intron-exon-intron-exon-intron-exon-intron-exon-exon-exon-exon-intron-exon-intron-exon-intron-exon-intron-exon-exon-intron-exon-intron-exon-intron-exon-intron-exon-intron-exon-intron-exon-intron-exon-in…
NC_031969.2	19763499	19832440	gi|1434915810|ref|XM_013274300.3|	PREDICTED: Oreochromis niloticus nuclear GTPase SLIP-GC (LOC102081603), transcript variant X8, mRNA	1	68972	68972	exon-exon-exon-intron-exon-intron-exon-intron-exon-intron-exon-intron-exon-intron-exon-intron-exon-intron-exon-intron-exon-intron-exon-intron-exon-intron-exon-intron-exon-intron-exon-intron-exon-intron-exon-intron-exon-intron-exon-intron-exon-intron-exon-exon-exon-exon-intron-exon-intron-exon-intron-exon-intron-exon-exon-intron-exon-intron-exon-intron-exon-intron-exon-intron-exon-intron-exon-intr…
NC_031969.2	19585411	19771375	gi|1434915889|ref|XM_019357924.2|	PREDICTED: Oreochromis niloticus nuclear GTPase SLIP-GC-like (LOC109194209), transcript variant X3, mRNA	1	185995	185995	exon-intron-exon-intron-exon-intron-exon-intron-exon-intron-exon-exon-intron-exon-intergenic-exon-intron-exon-intron-exon-intron-exon-intron-exon-intron-exon-intron-exon-intron-exon-exon-exon-intron-exon-exon-intron-exon-exon-intron-exon-exon-exon-intron-exon-intron-exon-exon-intron-exon-intron-exon-intron-exon-intron-exon-intron-exon-intron-exon-intron-exon-intron-exon-intron-exon-intron-exon-in…
NC_031969.2	19578903	19833796	gi|1434915889|ref|XM_019357924.2|	PREDICTED: Oreochromis niloticus nuclear GTPase SLIP-GC-like (LOC109194209), transcript variant X3, mRNA	1	254924	254924	exon-intron-exon-intron-exon-intron-exon-intron-exon-intron-exon-intron-exon-intron-exon-intron-exon-intron-exon-intron-exon-intron-exon-intron-exon-intron-exon-intron-exon-exon-intron-exon-intergenic-exon-intron-exon-intron-exon-intron-exon-intron-exon-intron-exon-intron-exon-intron-exon-exon-exon-intron-exon-exon-intron-exon-exon-intron-exon-exon-exon-intron-exon-intron-exon-exon-intron-exon-in…
NC_031969.2	19577788	19832782	gi|1434915889|ref|XM_019357924.2|	PREDICTED: Oreochromis niloticus nuclear GTPase SLIP-GC-like (LOC109194209), transcript variant X3, mRNA	1	255025	255025	exon-intron-exon-intron-exon-intron-exon-exon-intron-exon-intron-exon-intron-exon-intron-exon-intron-exon-intron-exon-intron-exon-intron-exon-intron-exon-intron-exon-intron-exon-intron-exon-intron-exon-intron-exon-exon-intron-exon-intergenic-exon-intron-exon-intron-exon-intron-exon-intron-exon-intron-exon-intron-exon-intron-exon-exon-exon-intron-exon-exon-intron-exon-exon-intron-exon-exon-exon-in…
NC_031969.2	19563544	19763629	gi|1434915889|ref|XM_019357924.2|	PREDICTED: Oreochromis niloticus nuclear GTPase SLIP-GC-like (LOC109194209), transcript variant X3, mRNA	1	200116	200116	exon-intron-exon-intron-exon-intron-exon-intron-exon-exon-intron-exon-intron-exon-intron-exon-intron-exon-intron-exon-intergenic-exon-intron-exon-intron-exon-intron-exon-intron-exon-intron-exon-intron-exon-intron-exon-exon-intron-exon-intron-exon-intron-exon-intron-exon-intron-exon-intron-exon-intron-exon-intron-exon-intron-exon-intron-exon-intron-exon-intron-exon-intron-exon-intron-exon-exon-int…
NC_031969.2	18120322	18122039	gi|1434918547|ref|XM_025906611.1|	PREDICTED: Oreochromis niloticus ribosomal protein S2 (rps2), transcript variant X2, mRNA	1	1748	1748	exon-intron-exon-exon-intron-exon-intron-exon-intron-exon-exon-exon-intron-
NC_031969.2	15777785	15883169	gi|1434975112|ref|XM_019346795.2|	PREDICTED: Oreochromis niloticus syncytin-2-like (LOC109195171), mRNA	1	105415	105415	intron-exon-intron-exon-intron-exon-exon-intron-exon-intron-exon-intron-exon-exon-intron-exon-intron-exon-intron-exon-intron-exon-intron-exon-intron-exon-intron-exon-intron-exon-exon-intron-exon-intron-exon-intron-exon-exon-intron-exon-intron-exon-intron-exon-intron-exon-exon-intron-exon-intron-exon-intron-exon-intron-exon-exon-intron-exon-exon-intron-exon-intron-exon-exon-intron-exon-intron-exon…
NC_031969.2	13847151	13847529	gi|908438932|ref|XM_013276766.1|	PREDICTED: Oreochromis niloticus butyrophilin subfamily 3 member A3 (LOC100706773), transcript variant X1, mRNA	1	409	409	exon-intron-exon-intron-
NC_031969.2	11385285	11463616	gi|930775287|ref|XM_005953227.2|	PREDICTED: Haplochromis burtoni DNA ligase 1-like (LOC102301947), transcript variant X3, mRNA	1	78362	78362	exon-intron-exon-exon-intron-exon-intron-exon-intron-exon-exon-exon-intron-exon-intron-exon-exon-intron-exon-intron-exon-exon-exon-exon-intron-exon-intron-exon-exon-intron-exon-intron-exon-intergenic-exon-intron-exon-exon-intron-exon-exon-intron-exon-intron-exon-intron-exon-intron-exon-intron-exon-intron-exon-intron-exon-exon-intron-exon-intron-exon-intron-exon-intron-exon-exon-exon-intron-exon-i…
NC_031969.2	10863423	10872041	gi|1434919685|ref|XM_019358110.2|	PREDICTED: Oreochromis niloticus adenylosuccinate lyase (LOC100706371), mRNA	1	8649	8649	exon-intron-exon-intron-exon-intron-exon-intron-exon-intron-exon-intron-exon-intron-exon-intergenic-exon-intron-exon-intron-exon-
NC_031969.2	10863232	10953698	gi|118495715|dbj|AB270897.1|	Oreochromis niloticus MHC class IA antigen UBA1, UBA2, UAA1 genes, partial cds, UAA3 and UAA2 pseudogenes, UAA4, UAA5 and UAA6 pseudogene fragments	1	90497	90497	exon-intron-exon-intron-exon-intron-exon-intron-exon-intron-exon-intron-exon-intron-exon-intron-exon-intergenic-exon-intron-exon-intron-exon-intergenic-exon-exon-intron-exon-intron-exon-intron-exon-intron-exon-intron-exon-intron-exon-intron-exon-intron-exon-exon-intron-exon-exon-intron-exon-intron-exon-exon-intron-exon-intron-exon-exon-intron-exon-intron-exon-intron-exon-intron-exon-intron-exon-i…
NC_031967.2	87310444	87326691	gi|1434912700|ref|XM_003460152.4|	PREDICTED: Oreochromis niloticus complement C1q tumor necrosis factor-related protein 3-like (LOC100691700), mRNA	1	16278	16278	exon-intron-exon-intron-exon-intron-exon-intron-exon-intron-exon-intron-exon-intron-exon-intron-
NC_031967.2	85764418	85770411	gi|930748488|ref|XM_014336956.1|	PREDICTED: Haplochromis burtoni nucleotide-binding oligomerization domain-containing protein 1-like (LOC106632325), transcript variant X3, mRNA	1	6024	6024	intron-exon-intergenic-exon-intron-exon-intergenic-
NC_031967.2	85615009	85798993	gi|1434896586|ref|XM_025904350.1|	PREDICTED: Oreochromis niloticus ATP-dependent DNA helicase PIF1-like (LOC109195818), transcript variant X3, mRNA	1	184015	184015	exon-intron-exon-intron-exon-intron-intron-exon-intron-exon-exon-intron-exon-exon-intron-exon-exon-intron-exon-intron-exon-intron-exon-intron-exon-intron-exon-intron-exon-intron-exon-intron-exon-exon-intron-exon-intron-exon-intron-exon-intron-exon-exon-intron-exon-exon-intron-exon-intron-exon-exon-intron-exon-intron-exon-intron-exon-intergenic-exon-intron-exon-intron-exon-intron-exon-intron-exon-…
NC_031967.2	85419243	85419422	gi|1110872210|ref|XM_019354503.1|	PREDICTED: Oreochromis niloticus protein NLRC3 (LOC102080346), partial mRNA	1	210	210	intron-
NC_031967.2	85403910	85617317	gi|1434914005|ref|XM_025905865.1|	PREDICTED: Oreochromis niloticus protein NLRC3-like (LOC112846389), mRNA	1	213438	213438	exon-intron-exon-exon-exon-exon-intron-exon-exon-intron-exon-intron-exon-intron-exon-intron-exon-intron-exon-intron-exon-intron-exon-intron-exon-exon-intergenic-exon-intron-exon-exon-intron-exon-intron-exon-intron-exon-intergenic-exon-intron-exon-intergenic-exon-intron-exon-intron-exon-intron-exon-exon-intergenic-exon-intron-exon-exon-intron-exon-intron-exon-intron-exon-intron-exon-exon-intron-ex…
NC_031967.2	81374639	81374749	gi|1434897705|ref|XM_025904555.1|	PREDICTED: Oreochromis niloticus NACHT, LRR and PYD domains-containing protein 12 (LOC102080813), transcript variant X4, mRNA	1	141	141	exon-
NC_031967.2	80247905	80269191	gi|1434911122|ref|XM_019351535.2|	PREDICTED: Oreochromis niloticus C-type mannose receptor 2-like (LOC102081993), mRNA	1	21317	21317	exon-intron-exon-exon-intron-exon-intron-exon-intron-exon-intron-exon-intergenic-exon-intron-exon-exon-intron-exon-intron-exon-intron-intron-
NC_031967.2	79659591	79660772	gi|1434912821|ref|XM_003451115.4|	PREDICTED: Oreochromis niloticus beta-enolase (LOC100699677), mRNA	1	1212	1212	exon-intron-exon-intron-exon-
NC_031967.2	789599	790764	gi|1434907618|ref|XM_025899688.1|	PREDICTED: Oreochromis niloticus ankyrin-2 (LOC100696152), transcript variant X2, mRNA	1	1192	1192	exon-intron-exon-
NC_031967.2	77006431	77021663	gi|1434988718|ref|XR_002057811.2|	PREDICTED: Oreochromis niloticus probable RNA-directed DNA polymerase from transposon X-element (LOC102080879), transcript variant X2, ncRNA	1	15263	15263	intron-exon-intron-exon-intron-exon-exon-intron-
NC_031967.2	7417222	7418306	gi|1434912255|ref|XM_005455235.4|	PREDICTED: Oreochromis niloticus fibroblast growth factor 11 (fgf11), mRNA	1	1113	1113	exon-
NC_031967.2	72998081	73027539	gi|28849242|dbj|AB104861.1|	Oreochromis niloticus GnRH1 gene for seabream-type gonadotropin-releasing hormone precursor, complete cds	1	29489	29489	exon-intergenic-exon-intron-exon-exon-intron-exon-intron-exon-intergenic-exon-intron-exon-intron-exon-exon-intron-intergenic-
NC_031967.2	70770806	70840006	gi|1434990397|ref|XM_025902117.1|	PREDICTED: Oreochromis niloticus zinc finger BED domain-containing protein 1-like (LOC112843459), mRNA	1	69231	69231	exon-intron-exon-exon-intron-exon-exon-intron-exon-intron-exon-intron-exon-intron-exon-exon-exon-intron-exon-exon-exon-exon-intron-intron-intergenic-intron-
NC_031967.2	69301968	69313119	gi|118495715|dbj|AB270897.1|	Oreochromis niloticus MHC class IA antigen UBA1, UBA2, UAA1 genes, partial cds, UAA3 and UAA2 pseudogenes, UAA4, UAA5 and UAA6 pseudogene fragments	1	11182	11182	exon-intron-exon-exon-intron-exon-intron-exon-intron-exon-intergenic-
NC_031967.2	69301602	69431155	gi|1468883830|ref|XM_026143023.1|	PREDICTED: Astatotilapia calliptera zinc finger MYM-type protein 1-like (LOC113006830), mRNA	1	129584	129584	exon-intron-exon-intron-exon-exon-intron-exon-intron-exon-intron-exon-intron-exon-intron-exon-exon-intron-exon-intron-exon-intron-exon-intron-exon-exon-intron-exon-intron-exon-intron-exon-intron-exon-exon-intron-exon-intron-exon-exon-intron-exon-intron-exon-intron-exon-exon-intron-exon-intron-exon-intron-exon-intron-exon-intron-exon-exon-intron-exon-intron-exon-intron-exon-intron-exon-intron-exon…
NC_031967.2	69301602	69321188	gi|118495715|dbj|AB270897.1|	Oreochromis niloticus MHC class IA antigen UBA1, UBA2, UAA1 genes, partial cds, UAA3 and UAA2 pseudogenes, UAA4, UAA5 and UAA6 pseudogene fragments	1	19617	19617	exon-intron-exon-intron-exon-exon-intron-exon-intron-exon-intron-exon-intron-exon-intron-exon-exon-intron-exon-intergenic-intergenic-
NC_031967.2	69291538	69313119	gi|118495715|dbj|AB270897.1|	Oreochromis niloticus MHC class IA antigen UBA1, UBA2, UAA1 genes, partial cds, UAA3 and UAA2 pseudogenes, UAA4, UAA5 and UAA6 pseudogene fragments	1	21612	21612	exon-intron-exon-intergenic-exon-intron-exon-intron-exon-intron-exon-intron-exon-exon-intron-exon-intron-exon-intron-exon-intergenic-
NC_031967.2	69291174	69321188	gi|118495715|dbj|AB270897.1|	Oreochromis niloticus MHC class IA antigen UBA1, UBA2, UAA1 genes, partial cds, UAA3 and UAA2 pseudogenes, UAA4, UAA5 and UAA6 pseudogene fragments	1	30045	30045	exon-intron-exon-intron-exon-intergenic-exon-intron-exon-intron-exon-intron-exon-intron-exon-exon-intron-exon-intron-exon-intron-exon-intron-exon-intron-exon-exon-intron-exon-intergenic-intergenic-
NC_031967.2	68764772	68817654	gi|1434911415|ref|XR_002061264.2|	PREDICTED: Oreochromis niloticus programmed cell death 1 ligand 1 (LOC109201242), transcript variant X3, misc_RNA	1	52913	52913	exon-exon-intron-exon-intron-exon-intron-exon-exon-exon-intron-exon-intron-exon-exon-exon-exon-intron-exon-intron-exon-intron-exon-intron-exon-intron-intron-intron-
NC_031967.2	68763629	68765104	gi|1434911445|ref|XM_025905344.1|	PREDICTED: Oreochromis niloticus signal-regulatory protein beta-2 (LOC109201241), mRNA	1	1506	1506	exon-intron-
NC_031967.2	67514091	67518087	gi|118495715|dbj|AB270897.1|	Oreochromis niloticus MHC class IA antigen UBA1, UBA2, UAA1 genes, partial cds, UAA3 and UAA2 pseudogenes, UAA4, UAA5 and UAA6 pseudogene fragments	1	4027	4027	exon-intron-exon-
NC_031967.2	66906951	67202167	gi|1434911326|ref|XM_019354770.2|	PREDICTED: Oreochromis niloticus sodium channel subunit beta-3-like (LOC109199423), transcript variant X1, mRNA	1	295247	295247	exon-intron-exon-intron-exon-intergenic-intron-exon-intron-exon-intron-exon-intron-exon-exon-intron-exon-exon-exon-intron-exon-intron-exon-intron-exon-exon-intron-exon-intron-exon-intron-exon-intron-exon-intron-exon-exon-exon-exon-exon-intron-exon-exon-exon-exon-exon-exon-intron-exon-intron-exon-intron-exon-intron-exon-exon-exon-exon-intron-exon-intron-exon-exon-exon-intron-exon-exon-exon-intron-…
NC_031967.2	65655648	65724609	gi|1434911195|ref|XM_025905277.1|	PREDICTED: Oreochromis niloticus protein NLRC3-like (LOC112846044), partial mRNA	1	68992	68992	exon-intron-exon-intron-exon-exon-intron-exon-intron-exon-exon-intron-exon-intron-exon-intron-exon-intron-exon-intron-exon-intergenic-exon-intron-exon-intergenic-exon-exon-intron-intergenic-
NC_031967.2	64003849	64360600	gi|118495715|dbj|AB270897.1|	Oreochromis niloticus MHC class IA antigen UBA1, UBA2, UAA1 genes, partial cds, UAA3 and UAA2 pseudogenes, UAA4, UAA5 and UAA6 pseudogene fragments	1	356782	356782	exon-exon-intron-exon-intron-exon-intron-exon-exon-exon-intron-exon-intron-exon-exon-intron-exon-intron-exon-intron-exon-intergenic-exon-intron-exon-intron-exon-intergenic-exon-intron-exon-intron-exon-intron-exon-exon-intron-exon-intron-exon-exon-intron-exon-intron-exon-exon-intron-exon-intron-exon-intron-exon-exon-intron-exon-intron-exon-intron-exon-intron-exon-exon-intron-exon-exon-intron-exon-…
NC_031967.2	60611792	60637179	gi|1434913727|ref|XM_019360045.2|	PREDICTED: Oreochromis niloticus cell surface A33 antigen (LOC109202473), mRNA	1	25418	25418	exon-intron-exon-exon-exon-exon-intron-exon-intron-exon-intergenic-exon-intron-exon-exon-intron-exon-exon-exon-
NC_031967.2	59223203	59231191	gi|923877940|ref|XM_005753844.2|	PREDICTED: Pundamilia nyererei signal-regulatory protein beta-2-like (LOC102204492), mRNA	1	8019	8019	exon-intron-exon-exon-exon-intron-
NC_031967.2	59209877	59232715	gi|923877940|ref|XM_005753844.2|	PREDICTED: Pundamilia nyererei signal-regulatory protein beta-2-like (LOC102204492), mRNA	1	22869	22869	exon-intron-exon-exon-intron-exon-intron-exon-intron-exon-intron-exon-intron-exon-intron-exon-intron-exon-exon-exon-intron-exon-intron-intron-
NC_031967.2	5918719	5946084	gi|1434912733|ref|XM_019350099.2|	PREDICTED: Oreochromis niloticus citrate synthase-lysine N-methyltransferase CSKMT, mitochondrial-like (LOC100699492), mRNA	1	27394	27394	exon-intron-exon-intron-exon-intron-exon-exon-exon-exon-exon-intron-exon-exon-intergenic-exon-intergenic-exon-intron-exon-intron-exon-intron-exon-intron-exon-intron-exon-intron-exon-exon-intron-exon-intron-exon-intron-exon-intron-exon-intron-exon-intron-exon-intergenic-exon-intron-exon-intron-exon-intron-exon-intron-exon-intron-exon-intergenic-exon-intron-exon-intron-
NC_031967.2	57015020	57064667	gi|927646860|gb|KT682030.1|	Neolamprologus obscurus voucher Matthew D. McGee:4441 ultra conserved element locus uce-441 genomic sequence	1	49678	49678	exon-intron-exon-exon-exon-intron-exon-intron-exon-intron-exon-intron-exon-intron-exon-exon-intron-exon-intergenic-exon-intron-exon-intron-exon-intron-exon-intron-exon-intron-exon-exon-exon-exon-exon-exon-intron-exon-intron-exon-exon-exon-intron-intron-exon-intergenic-exon-intergenic-exon-exon-intergenic-
NC_031967.2	44151902	44160633	gi|1434909410|ref|XM_019363272.2|	PREDICTED: Oreochromis niloticus obscurin (LOC109194564), transcript variant X1, mRNA	1	8762	8762	intergenic-exon-intron-exon-exon-intron-exon-intergenic-
NC_031967.2	43898424	43922435	gi|1468856155|ref|XR_003273570.1|	PREDICTED: Astatotilapia calliptera Cbl proto-oncogene B (cblb), transcript variant X5, misc_RNA	1	24042	24042	exon-intron-exon-intron-exon-intron-exon-exon-intron-exon-intron-exon-intergenic-
NC_031967.2	41853567	41868400	gi|1434951057|ref|XM_005452683.4|	PREDICTED: Oreochromis niloticus potassium/sodium hyperpolarization-activated cyclic nucleotide-gated channel 2 (LOC102078341), mRNA	1	14864	14864	exon-intron-exon-exon-exon-intron-exon-intron-exon-intron-exon-intron-exon-intron-exon-intron-exon-intron-exon-intron-exon-intron-exon-intron-exon-intron-exon-intergenic-
[truncated: 60 more rows]

## Sheet: ciri2
Gene ID	Gene coordinates start	Gene coordinates end	Host gene for circRNAs ID	Host gene for circRNAs	Number of circRNAs	Minimum size, bp	Maximum size, bp	Structure
NW_020327363.1	65973	66734	gi|1381413737|ref|XM_024800693.1|	PREDICTED: Maylandia zebra homeobox protein Hox-A3-like (LOC112431961), mRNA	1	789	789	exon-intron-exon-intron-exon-
[truncated: 800 more rows]

## Sheet: find_circ
Gene ID	Gene coordinates start	Gene coordinates end	Host gene for circRNAs ID	Host gene for circRNAs	Number of circRNAs	Minimum size, bp	Maximum size, bp	Structure
[truncated: 318 more rows]
